# Supplementary material for: UPLC-MS metabolite profiling and antioxidant activity of Sanghuangporus sanghuang extract
Source: PeerJ journal article supplement (doi:10.7717/peerj.18758), 2025-01-22
Supplement: identification_of_ingredients.zip [file elution gradient.xlsx]

## Sheet: Sheet1
time	A%	B%
0	95	5
2	95	5
4	70	30
8	50	50
10	20	80
14	0	100
15	0	100
15.1	95	5
16	95	5
