# Supplementary material for: UPLC-MS metabolite profiling and antioxidant activity of Sanghuangporus sanghuang extract
Source: PeerJ journal article supplement (doi:10.7717/peerj.18758), 2025-01-22
Supplement: identification_of_ingredients.zip [file Instrument Information Sheet.xlsx]

## Sheet: Sheet1
instruments	Models and specifications	manufacturer
ultrasonic cleaner	F-060SD	Shenzhen Fuyang Technology Group Co.
vortex oscillator	TYXH-I	Shanghai Khannuo Instrument Co.
Benchtop High-Speed Freezing Centrifuge	TGL-16MS	Shanghai Lu Xiangyi Centrifuge Instrument Co.
High Performance Liquid Chromatograph	ACQUITY UPLC I-Class HF	Waters
column	ACQUITY UPLC HSS T3 （100 mm×2.1 mm, 1.8 um）	Waters
PDA detector	ACQUity UPLC	Waters
High Resolution Liquid-Mass Spectrometer	Thermo-Obritrap-QE	Thermo
