# Supplementary material for: UPLC-MS metabolite profiling and antioxidant activity of Sanghuangporus sanghuang extract
Source: PeerJ journal article supplement (doi:10.7717/peerj.18758), 2025-01-22
Supplement: identification_of_ingredients.zip [file Mass Spectrometer.xlsx]

## Sheet: Sheet1
parameters	positive ion	negative ion
Spray Voltage (V)	3800	-3000
Capillary Temperature (°C)	320	320
Aux gas heater temperature (℃)	350	350
Sheath Gas Flow Rate (Arb)	35	35
Aux gas flow rate (Arb)	8	8
S-lens RF level	50	50
Mass range (m/z)	100-1200	100-1200
Full ms resolution	70000	70000
MS/MS resolution	17500	17500
NCE/stepped NCE	10，20，40	10，20，40
