# Supplementary material for: UPLC-MS metabolite profiling and antioxidant activity of Sanghuangporus sanghuang extract
Source: PeerJ journal article supplement (doi:10.7717/peerj.18758), 2025-01-22
Supplement: identification_of_ingredients.zip [file Reagent Information.xlsx]

## Sheet: Sheet1
Reagent	manufacturer	product number
methanol	thermo	A452-4
acetonitrile	thermo	A998-4
carboxylic acid	thermo	A117-50
