# Supplementary material for: UPLC-MS metabolite profiling and antioxidant activity of Sanghuangporus sanghuang extract
Source: PeerJ journal article supplement (doi:10.7717/peerj.18758), 2025-01-22
Supplement: Table_S1.xlsx [file Table_S1.xlsx]

## Sheet: Sheet1
No.	ID	Adducts	Formula	Score	Fragmentation Score	Mass Error (ppm)	Metabolites	Fragment Ions	theoretical m/z	m/z	Retention time (min)	Ion mode	SEE-1	SEE-2	SEE-3	SEE-1	SEE-2	SEE-3	M average	InChIKey	SMILES	HMDB	METLIN	LipidMaps	KEGG	PubChem	CAS	category	Section
compound00001	0.53_117.0549m/z	M+H-H2O	C5H10O4	51.6	61.7	1.76	Deoxyribose	71.0496, 72.0812, 73.0287, 76.9333, 88.0758, 94.9439, 99.0443, 116.0707, 116.1073, 117.0548	117.055	117.055	0.53	POS	2190.55	2398.98	1863.63	0.00287558	0.00316335	0.00242216	0.00282037	PDWIQYODPROSQH-WISUUJSJSA-N	OC[C@@H]1O[C@H](O)C[C@H]1O	HMDB0003224	3258		C01801	22833604	533-67-5	Carbohydrates and Glycosides	Carbohydrates
compound00002	4.31_180.0423n	M+H-H2O, M+H	C9H8O4	58.4	53.4	0.37	Caffeic acid	133.0282, 135.0438, 145.0282, 163.0386	163.039	163.039	4.31	POS	267049	275660	277773	0.350561	0.363492	0.361023	0.358359	QAIPRVGONGVQAS-DUXPYHPUSA-N	OC(=O)\C=C\C1=CC(O)=C(O)C=C1	HMDB0001964	3316		C01481	689043	501-16-6	Organic acids and derivatives
compound00003	1.21_268.1041m/z	M+H	C10H13N5O4	58.1	80.9	0.3	Adenosine	136.0616, 268.1038	268.104	268.104	1.21	POS	45232	43876.5	43687.1	0.059377	0.0578566	0.0567803	0.0580046	OIRDTQYFTABQOQ-KQYNXXCUSA-N	NC1=C2N=CN([C@@H]3O[C@H](CO)[C@@H](O)[C@H]3O)C2=NC=N1	HMDB0000050	86		C00212	60961	58-61-7	Nucleotides and derivatives	Purine nucleosides
compound00004	6.33_207.0657m/z	M-H	C11H12O4	50.4	52.7	-3	Ethyl Caffeic acid	135.0442, 161.0236, 161.0446, 179.0342, 207.0657	207.066	207.066	6.33	NEG	20997.4	22418	22634.2	0.0275637	0.0295609	0.0294178	0.0288474	WDKYDMULARNCIS-GQCTYLIASA-N	CCOC(=O)\C=C\C1=CC(O)=C(O)C=C1	HMDB0301712					102-37-4	Phenylpropanoids	Simple phenylpropanoids
compound00005	4.18_159.0655m/z	M-H	C7H12O4	54.8	61.6	-4.85	Pimelic acid	95.0488, 97.0648, 115.0754, 129.0181, 130.9825, 158.0818, 158.8923, 159.0287, 159.0439, 159.0651	159.066	159.065	4.18	NEG	5344.57	5619.81	5636.74	0.00701593	0.00741041	0.00732609	0.00725081	WLJVNTCWHIRURA-UHFFFAOYSA-N	C(CCCCCC(=O)O)(=O)O	HMDB0000857	3280	LMFA01170051	C02656	385	111-16-0	Fatty Acyls	Fatty acid and derivatives
compound00006	0.68_225.0611m/z	M+FA-H	C6H12O6	51.3	57.1	-2.88	myo-Inositol	151.0603, 153.0185, 157.0121, 161.0445, 179.0555, 181.0130, 181.0494, 225.0042, 225.0374, 225.0610	225.062	225.061	0.68	NEG	127567	131662	134692	0.16746	0.173612	0.17506	0.172044	CDAISMWEOUEBRE-GPIVLXJGSA-N	O[C@H]1[C@H](O)[C@@H](O)[C@H](O)[C@H](O)[C@@H]1O	HMDB0000211	5221		C00137		87-89-8	Others
compound00007	12.03_271.2278m/z	M-H	C16H32O3	69	77.2	-0.37	2-Hydroxyhexadecanoic acid	225.2219, 271.2276	271.228	271.228	12.03	NEG	338132	318102	327921	0.443874	0.419456	0.426201	0.429843	JGHSBPIZNUXPLA-HNNXBMFYSA-N	C(CCCCCCCCCCCCC)[C@H](O)C(=O)O	HMDB0031057		LMFA01050422		12575964	16452-52-1	Fatty Acyls	Fatty acid and derivatives
compound00008	4.55_165.0186m/z	M-H	C8H6O4	64.8	66.5	-4.62	Isophthalic Acid	121.0286, 165.0183	165.019	165.019	4.55	NEG	34424.8	35488.8	36336.5	0.0451902	0.0467964	0.0472267	0.0464045	QQVIHTHCMHWDBS-UHFFFAOYSA-N	C1=CC(=CC(=C1)C(=O)O)C(=O)O		268528			8496		Organic acids and derivatives
compound00009	5.49_279.9973n	M+H, M+Na	C11H8N2O3S2	59.9	87.1	-1.05	Luciferin	177.0113, 193.9725, 234.9989, 281.0043	281.005	281.005	5.49	POS	4.53701e+06	4.65887e+06	4.72891e+06	5.95583	6.14329	6.14618	6.08177	BJGNCJDXODQBOB-SSDOTTSWSA-N	C1C(N=C(S1)C2=NC3=C(S2)C=C(C=C3)O)C(=O)O		65823		C02740	92934	2591-17-5	Others
compound00010	4.74_173.0812m/z	M-H	C8H14O4	57	72.3	-4.33	Suberic acid	61.9873, 111.0805, 129.0911, 152.996, 173.0812	173.082	173.081	4.74	NEG	8165.09	8222.9	7871.32	0.0107185	0.0108429	0.0102304	0.0105973	TYFQFVWCELRYAO-UHFFFAOYSA-N	OC(CCCCCCC(=O)O)=O	HMDB0000893	4243	LMFA01170001	C08278	10457	505-48-6	Fatty Acyls	Fatty acid and derivatives
compound00011	4.83_167.0342m/z	M-H	C8H8O4	53.8	67.1	-4.37	Methyl protocatechuate	108.0206, 123.0443, 152.0106, 167.0341	167.035	167.034	4.83	NEG	7956.02	7640.04	7618.04	0.010444	0.0100743	0.0099012	0.0101399	CUFLZUDASVUNOE-UHFFFAOYSA-N	O=C(OC)C1=CC=C(O)C(O)=C1						2150-43-8	Carboxylic acid and derivatives
compound00012	11.47_277.2158m/z	M+H	C18H28O2	56.4	58.2	-1.33	Stearidonic acid	95.0856, 97.0650, 107.0857, 121.1012, 135.1168, 147.1160, 149.1323, 277.1408, 277.1784, 277.2153	277.216	277.216	11.47	POS	43471.1	47801.2	48076	0.0570655	0.0630317	0.0624846	0.0608606	JIWBIWFOSCKQMA-LTKCOYKYSA-N	C(CCCC/C=C\C/C=C\C/C=C\C/C=C\CC)(=O)O	HMDB0006547	34838	LMFA01030357	C16300	5312508	20290-75-9	Fatty Acyls	Fatty acid and derivatives
compound00013	4.68_341.0653m/z	M+H-H2O	C18H14O8	63.6	74.5	-0.76	Przewalskinic acid A	267.0643, 269.0804, 277.0492, 279.0643, 295.0593, 297.0755, 313.0696, 323.0540, 340.1820, 341.0603	341.066	341.065	4.68	POS	43662.6	43429.5	43692.4	0.0573168	0.0572672	0.0567872	0.0571238	GJHXGOBGPWPCCK-DBLORFJXSA-N	O=C(O)/C=C/c1ccc(O)c2c1[C@@H](C(=O)O)[C@H](c1ccc(O)c(O)c1)O2						136112-75-9	Phenylpropanoids	Lignans
compound00014	1.11_243.0625m/z	M-H	C9H12N2O6	49.5	58.4	0.8	Pseudouridine	175.0239, 175.0604, 181.0507, 182.0448, 199.0246, 199.0595, 200.0558, 225.0393, 243.0136, 243.0598	243.062	243.062	1.11	NEG	6076.13	6204.14	6206.25	0.00797627	0.00818092	0.00806629	0.00807449	PTJWIQPHWPFNBW-GBNDHIKLSA-N	OC[C@H]1O[C@H]([C@H](O)[C@@H]1O)C1=CNC(=O)NC1=O	HMDB0000767	5734		C02067	15047	1445-07-4	Nucleotides and derivatives
compound00015	4.74_275.0198m/z	M-H	C13H8O7	54.7	69.2	0.36	3,4,8,9,10-Pentahydroxy Urolithin	187.0393, 217.0141, 229.0141, 257.0099, 275.0201	275.02	275.02	4.74	NEG	35308.3	36612	36703.3	0.0463499	0.0482774	0.0477034	0.0474436	ZELMDXUEWHBWPN-UHFFFAOYSA-N	O=c1oc2c(O)c(O)ccc2c2c(O)c(O)c(O)cc12						91485-02-8	Phenols	Polyphenols
compound00016	3.94_139.0391m/z	M+H	C7H6O3	58.8	77.6	0.98	3,4-Dihydroxybenzaldehyde	65.0391, 69.034, 93.0338, 111.0441, 134.0599, 139.0389	139.039	139.039	3.94	POS	74748.9	76976.8	78201.7	0.0981245	0.101503	0.101639	0.100422	IBGBGRVKPALMCQ-UHFFFAOYSA-N	OC1=CC=C(C=O)C=C1O	HMDB0059965	63101		C16700	8768	139-85-5	Phenols	Polyphenols
compound00017	0.72_182.0783n	M-H, M+FA-H	C6H14O6	58.6	80.6	-3.91	Sorbitol	59.0128, 71.0128, 73.0285, 85.0285, 89.0234, 101.0234, 119.034, 163.0603, 181.0711	181.072	181.071	0.72	NEG	3.12083e+06	3.34164e+06	3.4693e+06	4.09678	4.40636	4.50907	4.3374	FBPFZTCFMRRESA-JGWLITMVSA-N	OC[C@H](O)[C@@H](O)[C@H](O)[C@H](O)CO	HMDB0000247	143		C00794	5780	50-70-4	Carbohydrates and Glycosides	Carbohydrates
compound00018	6.06_249.1480m/z	M+H	C15H20O3	51.9	55.6	-2.15	Pterosin A	81.0703, 123.1167, 203.1427, 231.138, 249.1101, 249.1475	249.149	249.148	6.06	POS	36791.4	36141.2	36529.2	0.0482969	0.0476566	0.0474771	0.0478102	BDZJLPDYMKPKGC-HNNXBMFYSA-N	O=C1C2=C(C(=C(C=C2CC1(C)CO)C)CCO)C					135017	37124-17-7	Terpenes	Sesquiterpenes
compound00019	0.72_119.0585n	M+H-H2O, M+H	C4H9NO3	66.2	63.3	2.07	4-Amino-3-hydroxybutyrate	56.0501, 72.0812, 84.0447, 85.0288, 86.0604, 102.0552	102.055	102.055	0.72	POS	98913.7	98126.5	95447.2	0.129846	0.129392	0.124053	0.127764	YQGDEPYYFWUPGO-UHFFFAOYSA-N	NCC(O)CC(O)=O	HMDB0061877	313521		C03678	2149		Amino Acids, Peptides and derivatives	Amino Acids
compound00020	0.73_182.0789n	M+H-H2O, M+H	C6H14O6	57.6	72.8	-0.97	Mannitol	100.0759, 101.0599, 111.0441, 118.0862, 128.0705, 129.0544, 146.0809, 147.0649, 164.0915, 165.0754	165.076	165.076	0.73	POS	322718	325610	317011	0.423639	0.429357	0.412021	0.421672	FBPFZTCFMRRESA-KVTDHHQDSA-N	OC[C@@H](O)[C@@H](O)[C@H](O)[C@H](O)CO	HMDB0000765	142		C00392	6251	69-65-8	Carbohydrates and Glycosides	Carbohydrates
compound00021	0.73_153.0756m/z	M+H	C5H12O5	52.8	53.5	-0.96	Ribitol	57.0341, 69.034, 71.0132, 71.0496, 73.0289, 97.0649, 99.0443, 117.0546, 135.1165, 152.07	153.076	153.076	0.73	POS	20979.8	20428.7	20679.1	0.0275407	0.0269378	0.0268767	0.0271184	HEBKCHPVOIAQTA-ZXFHETKHSA-N	OC[C@H](O)[C@H](O)[C@H](O)CO	HMDB0000508	316		C00474		488-81-3	Carbohydrates and Glycosides	Carbohydrates
compound00022	0.73_190.0951n	M+H-H2O, M+H	C7H14N2O4	53.1	61.9	-1.23	Diaminopimelic acid	98.9845, 110.0602, 114.0551, 127.0864, 128.0708, 156.0651, 173.092	191.103	191.102	0.73	POS	620273	610709	597116	0.814245	0.805295	0.776074	0.798538	GMKMEZVLHJARHF-WHFBIAKZSA-N	C(=O)(O)[C@@H](N)CCC[C@H](N)C(=O)O	HMDB0001370	45927	LMFA01170102	C00666	439283	583-93-7	Amino Acids, Peptides and derivatives	Amino Acids
compound00023	5.92_201.1125m/z	M-H	C10H18O4	59.7	85.1	-3.62	Sebacic acid	139.1118, 183.102, 201.1125	201.113	201.113	5.92	NEG	21791	23625.1	22070.1	0.0286055	0.0311526	0.0286846	0.0294809	CXMXRPHRNRROMY-UHFFFAOYSA-N	C(CCCCCCCCC(=O)O)(=O)O	HMDB0000792	4240	LMFA01170006	C08277	5192	111-20-6	Fatty Acyls	Fatty acid and derivatives
compound00024	1.10_192.0265n	M-H2O-H, M-H	C6H8O7	62.3	67.5	-2.43	Citric acid	61.9873, 85.0285, 111.0077, 129.0184, 173.0083	191.02	191.019	1.1	NEG	131161	147051	153199	0.172178	0.193905	0.199113	0.188399	KRKNYBCHXYNGOX-UHFFFAOYSA-N	OC(=O)CC(O)(CC(O)=O)C(O)=O	HMDB0000094	124		C00158	311	77-92-9	Organic acids and derivatives
compound00025	9.60_317.2927n	M+H, M+Na, M+H-H2O	C18H39NO3	66.4	92.7	-0.88	Phytosphingosine	60.045, 282.2786, 300.2891, 318.2997	318.3	318.3	9.6	POS	6.61479e+06	6.55492e+06	6.67146e+06	8.68337	8.64347	8.67092	8.66592	AERBNCYCJBRYDG-KSZLIROESA-N	OC[C@]([H])(N)[C@]([H])(O)[C@@](O)([H])CCCCCCCCCCCCCC	HMDB0004610	7066	LMSP01030001	C12144	122121	554-62-1	Sphingolipids
compound00026	0.74_116.0708m/z	M+H	C5H9NO2	58.5	89.9	1.3	L-Proline	70.0656, 116.0706	116.071	116.071	0.74	POS	101617	104367	105729	0.133395	0.13762	0.137417	0.136144	ONIBWKKTOPOVIA-BYPYZUCNSA-N	OC(=O)[C@@H]1CCCN1	HMDB0000162	29		C00148	145742	147-85-3	Amino Acids, Peptides and derivatives	Amino Acids
compound00027	0.71_147.0763m/z	M+H	C5H10N2O3	59.5	93.4	-0.65	L-Glutamine	84.0447, 102.0551, 130.0497	147.076	147.076	0.71	POS	431837	426972	420004	0.566882	0.563014	0.545881	0.558593	ZDXPYRJPNDTMRX-VKHMYHEASA-N	N[C@@H](CCC(N)=O)C(O)=O	HMDB0000641	18		C00064	5961	56-85-9	Amino Acids, Peptides and derivatives	Amino Acids
compound00028	4.49_217.1077m/z	M-H	C10H18O5	50.9	52.4	-2.01	3-Hydroxysebacic acid	59.0129, 155.1069, 157.0862, 216.9921, 217.0131, 217.0505, 217.1078	217.108	217.108	4.49	NEG	6378.33	6558.36	6453.11	0.00837298	0.008648	0.00838714	0.00846937	OQYZCCKCJQWHIE-MRVPVSSYSA-N	O[C@H](CCCCCCC(O)=O)CC(O)=O	HMDB0000350				124350389	446881-43-2	Organic acids and derivatives
compound00029	0.71_147.0530n	M+H-H2O, M+H	C5H9NO4	57.1	82.1	-1.06	L-Glutamic acid	84.0448, 84.0812, 130.0497	148.06	148.06	0.71	POS	2.61257e+06	2.57372e+06	2.53515e+06	3.42958	3.39376	3.29494	3.37276	WHUUTDBJXJRKMK-VKHMYHEASA-N	N[C@@H](CCC(O)=O)C(O)=O	HMDB0000148	19		C00025	33032	56-86-0	Amino Acids, Peptides and derivatives	Amino Acids
compound00030	0.73_360.1497m/z	M+NH4	C12H22O11	66.5	90.1	-0.99	Melibiose	91.0393, 97.0286, 109.0285, 127.0389, 145.0493, 163.0598, 180.0860, 198.0964, 325.1123, 360.1480	360.15	360.15	0.73	POS	3.60446e+06	3.3629e+06	3.56665e+06	4.73166	4.43439	4.63558	4.60054	DLRVVLDZNNYCBX-CQHUIXDMSA-N	OC[C@H]1O[C@H](OC[C@H]2O[C@H](O)[C@H](O)[C@@H](O)[C@@H]2O)[C@H](O)[C@@H](O)[C@H]1O	HMDB0000048				6602503	13299-20-2	Carbohydrates and Glycosides	Carbohydrates
compound00031	0.69_175.1189m/z	M+H	C6H14N4O2	52.1	61.2	-0.32	L-Arginine	60.0562, 70.0656, 116.0706, 130.0972, 158.0921, 174.8954, 175.1188	175.119	175.119	0.69	POS	10386.7	10281.2	10853.8	0.0136349	0.0135571	0.0141067	0.0137662	ODKSFYDXXFIFQN-BYPYZUCNSA-N	N[C@@H](CCCNC(N)=N)C(O)=O	HMDB0000517	13		C00062	6322	74-79-3	Amino Acids, Peptides and derivatives	Amino Acids
compound00032	0.69_104.1072m/z	M+	C5H14NO+	56.5	77.3	-3.08	Choline	58.0657, 60.0813, 87.0444, 104.0708, 104.1071	104.108	104.107	0.69	POS	134388	134709	138063	0.176414	0.177631	0.179441	0.177829	OEYIOHPDSNJKLS-UHFFFAOYSA-N	C[N+](C)(C)CCO	HMDB0000097	56		C00114	305	62-49-7	Others
compound00033	1.37_132.1021m/z	M+H	C6H13NO2	65.9	72.3	1.36	L-Isoleucine	69.0703, 86.0967, 132.1018	132.102	132.102	1.37	POS	165525	162514	166589	0.217288	0.214295	0.216516	0.216033	AGPKZVBTJJNPAG-WHFBIAKZSA-N	C([C@@H](N)[C@@H](C)CC)(=O)O	HMDB0000172	23	LMFA01100047	C00407	6306	73-32-5	Amino Acids, Peptides and derivatives	Amino Acids
compound00034	4.85_207.0890n	M-H, M+FA-H	C11H13NO3	59.3	83.2	-2.48	N-Acetyl-L-phenylalanine	58.0288, 70.0287, 147.0444, 161.0447, 163.0394, 164.0708, 206.0186, 206.0816	206.082	206.082	4.85	NEG	12412	12861.8	12636.8	0.0162935	0.0169599	0.0164241	0.0165592	CBQJSKKFNMDLON-JTQLQIEISA-N	CC(=O)N[C@@H](CC1=CC=CC=C1)C(O)=O	HMDB0000512	34536		C03519	74839	2018-61-3	Amino Acids, Peptides and derivatives	Peptides
compound00035	11.43_332.2580m/z	M+NH4	C21H30O2	58.7	81.9	-1.41	Cannabidiol	93.0701, 95.0859, 107.0856, 149.1322, 191.1063, 219.2103, 245.1536, 314.2477, 315.2310, 332.2587	332.258	332.258	11.43	POS	102709	105009	105834	0.134828	0.138467	0.137552	0.136949	QHMBSVQNZZTUGM-ZWKOTPCHSA-N	CCCCCC1=CC(=C(C(=C1)O)C2C=C(CCC2C(=C)C)C)O		41032		C07578	644019	13956-29-1	Terpenes	Meroterpenoids
compound00036	6.17_232.1462n	M+H-H2O, M+H	C15H20O2	58.4	67.2	-0.64	Isoalantolactone	159.1163, 163.0745, 173.0596, 177.0907, 187.1478, 191.1063, 215.1428, 233.0798, 233.1151, 233.1531	233.154	233.154	6.17	POS	33524	34510.9	33329.4	0.0440077	0.0455069	0.0433184	0.0442776	CVUANYCQTOGILD-QVHKTLOISA-N	CC12CCCC(=C)C1CC3C(C2)OC(=O)C3=C		67738		C09484	73285	470-17-7	Terpenes	Sesquiterpenes
compound00037	5.26_187.0969m/z	M-H	C9H16O4	59.4	76.9	-3.59	Azelaic acid	125.0962, 187.097	187.098	187.097	5.26	NEG	60121.6	61696.4	59222.1	0.0789229	0.0813543	0.0769712	0.0790828	BDJRBEYXGGNYIS-UHFFFAOYSA-N	C(CCCCCCCC(=O)O)(=O)O	HMDB0000784	5750	LMFA01170054	C08261	2266	123-99-9	Fatty Acyls	Fatty acid and derivatives
compound00038	7.90_470.2667n	M+H-H2O, M+NH4	C28H38O6	61.2	69.4	-0.33	Withaferin A	321.1813, 335.1985, 377.2094, 389.2456, 391.2615, 407.1822, 407.2542, 417.2381, 435.2515, 453.2624	453.264	453.263	7.9	POS	830199	830675	835810	1.08982	1.09535	1.08631	1.09049	DBRXOUCRJQVYJQ-CKNDUULBSA-N	O1[C@@H]2C[C@@]3([H])[C@]4([H])CC[C@]([H])([C@H](C)[C@@]5([H])CC(C)=C(CO)C(=O)O5)[C@@]4(C)CC[C@]3([H])[C@]3(C(C=C[C@@H]([C@]132)O)=O)C		67219	LMST01160017	C08841	265237	5119-48-2	Steroids	Other steroids
compound00039	12.38_439.3568m/z	M+H-H2O	C30H48O3	62.3	79.5	-0.59	Betulinic acid	179.1787, 239.1483, 259.1682, 371.1614, 393.3498, 421.3515, 438.3787, 439.2866, 439.3553, 439.3605	439.357	439.357	12.38	POS	97210.8	97401	95415.1	0.127611	0.128435	0.124011	0.126686	QGJZLNKBHJESQX-FZFNOLFKSA-N	C1[C@@]2(C)[C@@]([H])(CC[C@]3(C)[C@]2([H])CC[C@@]2([C@@]4([C@](CC[C@@]32C)(C(O)=O)CC[C@H]4C(C)=C)[H])[H])C(C)(C)[C@@H](O)C1	HMDB0030094	44088	LMPR0106140004	C08619	64971	472-15-1	Organic acids and derivatives
compound00040	4.89_178.0630n	M+H-H2O, M+H	C10H10O3	58.7	81.2	-0.03	Osmundacetone	105.07, 114.0914, 115.0542, 117.0698, 119.0854, 120.0806, 133.0646, 133.1011, 143.0488, 161.0593	179.07	179.07	4.89	POS	214823	206182	215136	0.282003	0.271876	0.279613	0.277831	YIFZKRGUGKLILR-NSCUHMNNSA-N	CC(=O)C=CC1=CC(=C(C=C1)O)O		828933			9942292		Phenylpropanoids	Simple phenylpropanoids
compound00041	10.59_235.1691m/z	M+H	C15H22O2	62.3	63.7	-0.7	Volvalerenic acid A	179.1066, 235.1689	235.169	235.169	10.59	POS	92504.4	94339.5	94991.6	0.121433	0.124398	0.123461	0.123097	BBGNZFMMXLMZRC-KZUCOUCWSA-N	C/C1=C\CC/C(C(=O)O)=C/[C@H]2[C@@H](CC1)C2(C)C						1247014-34-1	Carboxylic acid and derivatives
compound00042	1.10_160.0364n	M-H, 2M-H, M-H2O-H	C6H8O5	53.2	63.2	-4.66	Oxoadipic acid	89.0234, 97.0284, 97.0650, 99.0077, 113.0237, 115.0026, 115.0390, 141.0185, 158.0452, 159.0291	159.03	159.029	1.1	NEG	28944.3	29204.3	30160.8	0.0379958	0.0385094	0.0392002	0.0385685	FGSBNBBHOZHUBO-UHFFFAOYSA-N	C(=O)(O)C(=O)CCCC(=O)O	HMDB0000225	322	LMFA01170121	C00322	71	3184-35-8	Organic acids and derivatives
compound00043	5.02_246.0527n	M-H, 2M-H	C13H10O5	66.4	60.2	-0.57	Hispidin	159.0441, 201.0549, 245.0453	245.046	245.045	5.02	NEG	6.45929e+06	6.57387e+06	6.57159e+06	8.47926	8.66846	8.54112	8.56294	SGJNQVTUYXCBKH-UHFFFAOYSA-N	OC1=CC(=O)OC(C=CC2=CC=C(O)C(O)=C2)=C1	HMDB0253181				54722180		Alkaloids
compound00044	4.69_209.0451m/z	M-H	C10H10O5	59	51.3	-2.35	Vanilpyruvic acid	121.0286, 145.0074, 209.0071, 209.045	209.046	209.045	4.69	NEG	22561.9	24228.5	23316.6	0.0296175	0.0319482	0.0303047	0.0306235	YGQHQTMRZPHIBB-UHFFFAOYSA-N	COC1=C(O)C=CC(CC(=O)C(O)=O)=C1	HMDB0011714	62448			14124	1081-71-6	Organic acids and derivatives
compound00045	3.79_231.1703m/z	M+H	C11H22N2O3	51.8	54.8	-0.26	Valylleucine	72.0812, 111.0803, 132.1019, 231.0618, 231.1191, 231.1694	231.17	231.17	3.79	POS	9591.96	8777.36	8985.61	0.0125916	0.011574	0.0116786	0.0119481	XCTHZFGSVQBHBW-IUCAKERBSA-N	CC(C)C[C@H](NC(=O)[C@@H](N)C(C)C)C(O)=O	HMDB0029131	23950			6993117	3989-97-7	Amino Acids, Peptides and derivatives	Peptides
compound00046	0.74_549.1671m/z	M+FA-H	C18H32O16	50.7	57.9	-0.36	1-Kestose	75.0077, 206.0667, 207.0505, 549.1677	549.167	549.167	0.74	NEG	233174	226104	226785	0.306092	0.298146	0.294754	0.299664	VAWYEUIPHLMNNF-OESPXIITSA-N	OC[C@H]1O[C@@](CO)(OC[C@@]2(O[C@H]3O[C@H](CO)[C@@H](O)[C@H](O)[C@H]3O)O[C@H](CO)[C@@H](O)[C@@H]2O)[C@@H](O)[C@@H]1O	HMDB0011729			C03661	440080	470-69-9	Carbohydrates and Glycosides	Carbohydrates
compound00047	2.47_218.1029m/z	M-H	C9H17NO5	53.8	70.7	-2.2	Pantothenic acid	71.0128, 88.0394, 143.0335, 146.0814, 161.0445, 218.1027	218.103	218.103	2.47	NEG	124883	131325	128767	0.163936	0.173168	0.167359	0.168155	GHOKWGTUZJEAQD-ZETCQYMHSA-N	CC(C)(CO)[C@@H](O)C(=O)NCCC(O)=O	HMDB0000210	241		C00864	6613	79-83-4	Amino Acids, Peptides and derivatives	Peptides
compound00048	0.69_606.0741m/z	M-H	C17H27N3O17P2	59	89.7	-0.24	Uridine diphosphate-N-acetylglucosamine	78.958, 158.9246, 272.9568, 282.0382, 384.9842, 606.074	606.074	606.074	0.69	NEG	436329	447519	458757	0.572779	0.590108	0.596249	0.586379	LFTYTUAZOPRMMI-CFRASDGPSA-N	O(P(O)(=O)OC[C@@H]1[C@@H](O)[C@@H](O)[C@H](N2C(=O)NC(=O)C=C2)O1)P(O[C@H]1O[C@@H]([C@H]([C@@H]([C@H]1NC(C)=O)O)O)CO)(=O)O	HMDB0000290	5281	LMSL01010002	C00043	445675	528-04-1	Nucleotides and derivatives	Pyrimidine nucleosides
compound00049	0.73_104.0709m/z	M+H	C4H9NO2	58.3	85	2.43	gamma-Aminobutyric acid	58.0657, 60.0813, 69.034, 86.0604, 87.0443, 104.0709	104.071	104.071	0.73	POS	30261.9	30650.4	29338.2	0.0397254	0.0404164	0.038131	0.0394243	BTCSSZJGUNDROE-UHFFFAOYSA-N	C(CCN)C(=O)O	HMDB0000112		LMFA01100039	C00334	119	56-12-2	Amino Acids, Peptides and derivatives	Amino Acids
compound00050	0.69_260.0294n	M-H2O-H, M-H	C6H13O9P	56.5	54.1	-1.36	Glucose 6-phosphate	78.958, 96.9686, 138.9792, 171.0056, 199.0004, 259.0222	259.022	259.022	0.69	NEG	24472.7	28462.3	29755.4	0.0321259	0.037531	0.0386732	0.03611	NBSCHQHZLSJFNQ-GASJEMHNSA-N	OC1O[C@H](COP(O)(O)=O)[C@@H](O)[C@H](O)[C@H]1O	HMDB0001401	145		C00092	5958	56-73-5	Carbohydrates and Glycosides	Carbohydrates
compound00051	0.72_342.1161n	M+FA-H, 2M-H, M-H	C12H22O11	56.1	67.1	-0.47	Alpha-Lactose	59.0128, 71.0128, 89.0234, 101.0234, 119.034, 179.0554, 341.1086, 387.1142	387.114	387.114	0.72	NEG	1.76852e+07	1.67565e+07	1.72183e+07	23.2158	22.0956	22.3787	22.5634	GUBGYTABKSRVRQ-XLOQQCSPSA-N	OC[C@H]1O[C@@H](O[C@H]2[C@H](O)[C@@H](O)[C@@H](O)O[C@@H]2CO)[C@H](O)[C@@H](O)[C@H]1O	HMDB0000186	984806		C00243	84571	63-42-3	Carbohydrates and Glycosides	Carbohydrates
compound00052	1.10_137.0458m/z	M+H	C5H4N4O	55.5	55.7	0.45	Hypoxanthine	107.0001, 108.4936, 109.0196, 110.9963, 116.0053, 118.5079, 120.0015, 127.5131, 136.0615, 137.0456	137.046	137.046	1.1	POS	10183.5	10591	9220.57	0.0133682	0.0139655	0.011984	0.0131059	FDGQSTZJBFJUBT-UHFFFAOYSA-N	OC1=NC=NC2=C1NC=N2	HMDB0000157	83		C00262	790	68-94-0	Imidazopyrimidines
compound00053	8.29_495.2734m/z	2M-H	C15H20O3	40.4	0	-3.62	Micheliolide		495.275	495.273	8.29	NEG	4024.92	2629.42	3887.53	0.0052836	0.00346722	0.00505263	0.00460115	RDJAFOWISVMOJY-PWNZVWSESA-N	CC1=C2CCC(C2C3C(CC1)C(=C)C(=O)O3)(C)O		67759		C09507	442279	68370-47-8	Terpenes	Sesquiterpenes
compound00054	9.61_472.3051m/z	M+NH4	C28H38O5	52.3	0	-1.53	Meldenin	391.2633, 393.2819, 411.2311, 419.2553, 436.2555, 437.2682, 454.2634, 455.2784, 471.2729, 472.2772	472.306	472.305	9.61	POS	29304.2	30997.3	29616.2	0.0384683	0.0408737	0.0384922	0.0392781	KKBYMJHRFVZUIQ-SAGQAIRCSA-N	CC(=O)O[C@@H]1[C@@H]2[C@](CCC(=O)C2(C)C)([C@H]3CC[C@]4([C@@H](CC=C4C3([C@@H]1O)C)C5=COC=C5)C)C
compound00055	10.79_409.2350m/z	M+Na	C24H34O4	43.6	0	0.22	Medroxyprogesterone acetate		409.235	409.235	10.79	POS	6181.49	6052.21	6065.63	0.00811458	0.00798058	0.00788353	0.00799289	FRQMUZJSZHZSGN-HBNHAYAOSA-N	C1C[C@@](C(=O)C)(O)[C@@]2(C)CC[C@]3([H])[C@@]4(C)CCC(=O)C=C4[C@@H](C)C[C@@]3([H])[C@@]21[H]	HMDB0001939	1094	LMST02030176	C07119	10631	520-85-4	Steroids	Other steroids
compound00056	5.80_363.2155m/z	M+H-H2O	C21H32O6	54.9	0	-2.97	NIGAKIHEMIACETAL C		363.216	363.216	5.8	POS	1910.85	2025.09	2229.71	0.00250842	0.00267033	0.00289797	0.00269224	XUBQJRDNLZNZRC-UHFFFAOYSA-N	CC1C=C(C(=O)C2(C1CC3C4(C2C(C(C(C4CC(O3)O)C)O)O)C)C)OC					328260
compound00057	5.15_447.1068m/z	M+K	C20H24O9	40.5	0	4.04	Nodakenin		447.105	447.107	5.15	POS	4364.83	4388.55	4815.74	0.0057298	0.00578684	0.00625903	0.00592523	HXCGUCZXPFBNRD-DNLMCPORSA-N	CC(C)(C1CC2=C(O1)C=C3C(=C2)C=CC(=O)O3)OC4C(C(C(C(O4)CO)O)O)O		67571		C09279	73191	495-31-8	Phenylpropanoids	Coumarins
compound00058	8.11_311.2227m/z	2M-H	C9H16O2	53.8	35.5	-0.29	Nonenoic acid	174.9553, 183.1017, 311.2228	311.223	311.223	8.11	NEG	75149.2	76462.9	76275.7	0.0986499	0.100826	0.0991358	0.0995371	ADLXTJMPCFOTOO-UHFFFAOYSA-N	CCCCCCC=CC(=O)O					5312586
compound00059	3.84_199.0870m/z	M-H2O-H	C12H14N2O2	40.7	0	-2.94	N-Formylcytisine		199.088	199.087	3.84	NEG	1197.04	1489.76	1232.78	0.00157138	0.00196443	0.00160225	0.00171269	PCYQRXYBKKZUSR-VHSXEESVSA-N	O=CN1CC2C3=CC=CC(=O)N3CC(C1)C2					179619	53007-06-0	Alkaloids
compound00060	9.87_547.3279m/z	M+FA-H	C30H46O6	52.9	0	0.42	Medicagenic acid		547.328	547.328	9.87	NEG	3982.67	3850.47	4489.32	0.00522814	0.00507731	0.00583479	0.00538008	IDGXIXSKISLYAC-WNTKNEGGSA-N	[C@]12([H])CC=C3[C@]4([H])CC(CC[C@@]4(CC[C@@]3(C)[C@]1(C)CC[C@@]1([H])[C@](C)(C(=O)O)[C@H]([C@@H](O)C[C@]21C)O)C(=O)O)(C)C	HMDB34551		LMPR0106150034		65048		Terpenes	Triterpenes
compound00061	13.27_334.3100m/z	M+NH4	C22H36O	67.3	69.2	-1.41	mansumbinol	95.0857, 109.1012, 121.1012, 123.1168, 135.1168, 137.1320, 299.2725, 317.2831, 334.2057, 334.3095	334.31	334.31	13.27	POS	170874	181136	175652	0.224311	0.23885	0.228296	0.230486	UFUNZTHIOJRTHF-DRAFNHJNSA-N	C[C@]12CC[C@@H](C([C@@H]1CC[C@@]3([C@@H]2CC[C@H]4[C@]3(CC=C4)C)C)(C)C)O
compound00062	0.74_210.0732n	M-H2O-H, M-H	C7H14O7	43.8	25	-3.77	Mannoheptulose	85.0284, 87.0077, 101.0234, 102.9478, 111.0077, 129.0182, 133.0132, 191.0192, 191.0554	191.056	191.055	0.74	NEG	156752	156362	157943	0.205771	0.206183	0.205279	0.205745	HSNZZMHEPUFJNZ-QMTIVRBISA-N	O=C(CO)[C@@H](O)[C@@H](O)[C@H](O)[C@H](O)CO						3615-44-9	Carbohydrates and Glycosides	Carbohydrates
compound00063	4.57_307.1324m/z	M+K	C18H22NO+	54.3	0	-3.51	N-(p-Nydroxyphenethyl)actinidine		307.133	307.132	4.57	POS	1981.24	1774.91	1893.95	0.00260081	0.00234044	0.00246157	0.00246761	CKHCFVWFFIHGMT-UHFFFAOYSA-O	CC1CCC2=C(C)C=[N+](CCC3=CC=C(O)C=C3)C=C12	HMDB0030347	86906		C09984	3536737	15794-92-0
compound00064	4.42_134.0602m/z	M+H	C8H7NO	55.8	0	1.47	Mandelonitrile		134.06	134.06	4.42	POS	1356.13	1308.01	1422.64	0.00178023	0.00172477	0.00184901	0.00178467	NNICRUQPODTGRU-UHFFFAOYSA-N	OC(C#N)C1=CC=CC=C1	HMDB0034666	63621		C00561	10758	613-88-7
compound00065	6.81_265.1445m/z	M-H	C15H22O4	50.9	0	-0.23	Magnograndiolide		265.144	265.144	6.81	NEG	10726.8	11136	11207.4	0.0140813	0.0146841	0.0145664	0.0144439	VHFXPBHLQOPQHJ-ABBQYLIMSA-N	C[C@]1(CC[C@@H]2[C@@H]([C@@H]3[C@H]1CC[C@@]3(C)O)OC(=O)C2=C)O
compound00066	4.12_226.0479n	M+H-H2O, M+H	C10H10O6	57.7	0	0.57	m-Hemipic acid		227.055	227.055	4.12	POS	4544.45	4802.85	4797.5	0.0059656	0.00633315	0.00623533	0.00617802	SKBDLRWFSRLIPP-UHFFFAOYSA-N	COC1=C(OC)C=C(C(O)=O)C(=C1)C(O)=O	HMDB0033893	89599			290988	577-68-4
compound00067	4.86_181.0500m/z	M+FA-H	C8H8O2	45.5	0.171	-4.46	m-Anisaldehyde	59.0128, 71.0128, 89.0234, 101.0235, 112.9846, 152.0107, 153.0186, 163.0604, 180.9893, 181.0501	181.051	181.05	4.86	NEG	7827.03	7526.27	7882.89	0.0102747	0.00992432	0.0102454	0.0101482	WMPDAIZRQDCGFH-UHFFFAOYSA-N	COC1=CC(C=O)=CC=C1	HMDB0031459	87695			11569	591-31-1	Carboxylic acid and derivatives
compound00068	8.58_247.1327m/z	M+H-H2O	C15H20O4	50.9	0	-0.58	Lupulone C		247.133	247.133	8.58	POS	9704.69	9810.94	9707.75	0.0127396	0.0129369	0.0126172	0.0127646	KKNXLCGOZLVUHL-UHFFFAOYSA-N	CC(C)=CCC1(CC=C(C)C)C(=O)C(O)=C(O)C1=O	HMDB0030102	86721			12310637		Terpenes	Meroterpenoids
compound00069	11.13_471.3481m/z	M-H	C30H48O4	48.1	0	0.24	Maslinic acid		471.348	471.348	11.13	NEG	1285.07	989.058	1061.96	0.00168694	0.00130419	0.00138023	0.00145712	MDZKJHQSJHYOHJ-LLICELPBSA-N	CC1([C@@H](O)[C@@H](C[C@]2(C)[C@]3(CC=C4[C@]5([H])CC(C)(CC[C@]5(C(=O)O)CC[C@]4([C@]3(C)CC[C@@]12[H])C)C)[H])O)C	HMDB0002392	44861	LMPR0106180014	C16939	73659	4373-41-5	Terpenes	Triterpenes
compound00070	5.28_587.1165m/z	M+Na	C29H24O12	49.3	0	0.98	Neotheaflavin		587.116	587.116	5.28	POS	18912	19181.5	18930.9	0.0248262	0.0252932	0.0246045	0.024908	IPMYMEWFZKHGAX-WCQFOESSSA-N	O=c1c(O)cc([C@H]2Oc3cc(O)cc(O)c3C[C@H]2O)cc2c([C@H]3Oc4cc(O)cc(O)c4C[C@@H]3O)cc(O)c(O)c12						36451-14-6	Flavonoids	Flavanols
compound00071	1.11_168.0632m/z	M+Na	C6H11NO3	42.3	11.8	0.33	N-Hydroxypipecolic acid	150.9508, 168.0294, 168.0629	168.063	168.063	1.11	POS	11594.2	11509.4	10165	0.01522	0.0151765	0.0132115	0.014536	SEWARTPIJFHCRP-UHFFFAOYSA-N	O=C(O)C1CCCCN1O						115819-92-6	Carboxylic acid and derivatives
compound00072	12.66_339.2769n	M+H-H2O, M+H	C20H37NO3	42	2.88	-1.33	N-Oleoyl glycine	277.2159, 321.2404, 322.2741	322.274	322.274	12.66	POS	87329.8	88462	88456.5	0.11464	0.116648	0.114967	0.115418	HPFXACZRFJDURI-UHFFFAOYSA-N	CCCCCCCCC=CCCCCCCCC(=O)NCC(O)=O	HMDB0241916						Carboxylic acid and derivatives
compound00073	8.73_353.0664m/z	M+FA-H	C18H12O5	52.9	0	-0.76	Neodulin		353.067	353.066	8.73	NEG	6952.82	6654.52	6474.22	0.00912712	0.0087748	0.00841457	0.00877216	VZDPNKZCXYBWLM-UHFFFAOYSA-N	C12OC=CC1=CC1C3OC4=CC5OCOC=5C=C4C3COC=1C=2		48125	LMPK12070037		100179
compound00074	8.11_158.0731n	M+H-H2O, M+H	C11H10O	50.5	0	-0.55	methylnaphtol	117.9596, 128.9507, 129.0698, 131.0855, 141.0179, 141.0695, 144.0568, 158.1537, 158.9613, 159.0802	159.08	159.08	8.11	POS	50226.1	50861.4	52201.1	0.0659329	0.067067	0.067846	0.0669486	SRJCJJKWVSSELL-UHFFFAOYSA-N	CC1=C(C2=CC=CC=C2C=C1)O					24055	7469-77-4
compound00075	0.87_217.0683m/z	M+Na	C7H14O6	53.6	0	0.03	Methylbeta-D-fructofuranoside	139.0002, 157.0108, 180.0267, 217.0142, 217.0682	217.068	217.068	0.87	POS	30608.8	27481.8	26040.3	0.0401809	0.0362381	0.0338447	0.0367546	JPHVNZOOBXUCDJ-UHFFFAOYSA-N	COC1(C(C(C(O1)CO)O)O)CO					6325664	15219-93-9
compound00076	9.68_351.1248m/z	M-H2O-H	C21H22O6	40.7	0	2.74	Mollicellin I		351.124	351.125	9.68	NEG	3770.67	4468.02	4928.95	0.00494983	0.00589164	0.00640617	0.00574921	NTWOSLVOKRNGLX-UHFFFAOYSA-N	CC(C)=CCc1c(O)cc2c(c1C)OC(=O)c1c(C)cc(O)c(CO)c1O2						1016605-29-0	Phenols	Polyphenols
compound00077	3.85_399.0930m/z	M+FA-H	C16H18O9	40.5	0	-0.86	Neochlorogenic acid		399.093	399.093	3.85	NEG	3400.75	3069.08	3262.34	0.00446424	0.00404696	0.00424007	0.00425043	CWVRJTMFETXNAD-NXLLHMKUSA-N	[H]\C(=C(\[H])C1=CC(O)=C(O)C=C1)C(=O)O[C@]1([H])C[C@](O)(C[C@@]([H])(O)[C@]1([H])O)C(O)=O	HMDB0240477			C17147	5280633		Phenylpropanoids	Simple phenylpropanoids
compound00078	7.33_479.2653m/z	M-H	C26H40O8	52.5	0	0.51	Neoandrographolide		479.265	479.265	7.33	NEG	28346.8	28821.4	28133.7	0.0372114	0.0380046	0.0365655	0.0372605	YGCYRQKJYWQXHG-RDNQFMDVSA-N	CC1(CCCC2(C1CCC(=C)C2CCC3=CCOC3=O)C)COC4C(C(C(C(O4)CO)O)O)O		985467			9848024		Terpenes	Diterpenes
compound00079	9.99_209.1535m/z	M+H-H2O	C13H22O3	45.3	0	-0.57	Methyl dihydrojasmonate		209.154	209.154	9.99	POS	1997.9	2152.92	2048.48	0.00262269	0.00283889	0.00266242	0.002708	KVWWIYGFBYDJQC-GHMZBOCLSA-N	CCCCC[C@@H]1[C@@H](CC(=O)OC)CCC1=O	HMDB0031740				102861	24851-98-7	Others
compound00080	4.90_519.0908m/z	M+K	C22H24O12	51.8	0	1.77	micranthoside		519.09	519.091	4.9	POS	14917.4	13679.6	14890.6	0.0195825	0.0180382	0.0193534	0.0189913	BSCOLASOAXHKHJ-UHFFFAOYSA-N	COC1=CC(=C2C(=C1)OC(C(C2=O)O)C3=CC(=C(C=C3)O)OC4C(C(C(C(O4)CO)O)O)O)O
compound00081	12.64_375.2749m/z	M+FA-H	C19H38O4	50	0	-0.84	Monopalmitin		375.275	375.275	12.64	NEG	27733.6	26591.1	26351.9	0.0364065	0.0350636	0.0342496	0.0352399	QHZLMUACJMDIAE-UHFFFAOYSA-N	OCC([H])(O)COC(CCCCCCCCCCCCCCC)=O	HMDB0245964	24076	LMGL01010001		14900	542-44-9
compound00082	4.66_371.1350m/z	M-H	C17H24O9	50.9	0	0.62	multifidol glucoside		371.135	371.135	4.66	NEG	3639.05	4294.67	3937.64	0.00477706	0.00566305	0.00511777	0.00518596	MMJKSUJYDHTZJV-WVSKRKQGSA-N	CC[C@H](C)C(=O)C1=C(C=C(C=C1O[C@H]2[C@@H]([C@H]([C@@H]([C@H](O2)CO)O)O)O)O)O
compound00083	4.76_457.0896m/z	M+K	C21H22O9	41.1	0	0.15	Neoliquiritin		457.089	457.09	4.76	POS	6477.34	7234.68	5402.57	0.00850295	0.00953981	0.00702174	0.00835483	HJBUYKZTEBZNSH-IPVAVBGKSA-N	O=C1C[C@@H](c2ccc(O)cc2)Oc2cc(OC3O[C@H](CO)[C@@H](O)[C@H](O)[C@H]3O)ccc21						5088-75-5	Flavonoids	Flavanones
compound00084	13.87_346.3100m/z	M+H	C23H39NO	44.9	0	-1.35	N-Benzylpalmitamide		346.31	346.31	13.87	POS	30470.6	28943.3	29374.5	0.0399994	0.0381653	0.0381781	0.0387809	MLGPKWUKOQAAGI-UHFFFAOYSA-N	C(CCCCCCCCCCCCCCC)(=O)NCC1C=CC=CC=1	HMDB0039954	94496	LMFA08020155		11198769	74058-71-2	Carboxylic acid and derivatives
compound00085	7.78_203.0708m/z	M+FA-H	C11H10O	51.9	0	-3.75	Methoxynaphthalene		203.071	203.071	7.78	NEG	3637.91	3572.81	4044.81	0.00477557	0.00471118	0.00525705	0.0049146	NQMUGNMMFTYOHK-UHFFFAOYSA-N	COC1=CC=CC2=CC=CC=C21		345363			16668
compound00086	8.11_193.0863m/z	M-H	C11H14O3	56.1	0	-3.5	Methoxyeugenol	193.0865	193.087	193.086	8.11	NEG	22582.3	22609.9	22018.5	0.0296443	0.0298139	0.0286175	0.0293586	FWMPKHMKIJDEMJ-UHFFFAOYSA-N	COC1=CC(CC=C)=CC(OC)=C1O	HMDB0041194	95616			226486	6627-88-9
compound00087	7.24_381.0969m/z	M+H-H2O	C21H18O8	43.6	0	0.01	Naringenin triacetate		381.097	381.097	7.24	POS	6796.66	6588.34	6519.96	0.00892213	0.00868754	0.00847402	0.00869456	HQZXCNZZVRAEPO-UHFFFAOYSA-N	CC(=O)Oc1ccc(C2CC(=O)c3c(OC(C)=O)cc(OC(C)=O)cc3O2)cc1						3682-04-0	Flavonoids	Flavanones
compound00088	9.68_249.1494m/z	M-H	C15H22O3	47.4	0	-0.81	Nardosinone		249.15	249.149	9.68	NEG	5308.47	5602.36	6518.5	0.00696855	0.00738741	0.00847212	0.00760936	KXGHHSIMRWPVQM-JWFUOXDNSA-N	C[C@@H]1CCC=C2C(=O)C[C@H]3OOC(C)(C)[C@H]3[C@]21C						23720-80-1	Terpenes	Sesquiterpenes
compound00089	4.57_363.1050m/z	M+Na	C16H20O8	55.5	0	-0.16	methyl 6-o-p-cis-coumaroyl-β-d-glucopyra-noside		363.105	363.105	4.57	POS	3960.55	3197.04	3882.08	0.0051991	0.00421569	0.00504555	0.00482011	FDKJBXIGTBNKPD-UHFFFAOYSA-N	COC1C(C(C(C(O1)COC(=O)C=CC2=CC=C(C=C2)O)O)O)O
compound00090	10.63_295.2278m/z	M-H	C18H32O3	61	87.8	-0.29	(+/-)9-HODE	183.1021, 277.217, 295.2276	295.228	295.228	10.63	NEG	408381	401919	406085	0.536091	0.52998	0.52779	0.531287	NPDSHTNEKLQQIJ-UHFFFAOYSA-N	C(CCCCCCCC(O)C=CC=CCCCCC)(=O)O			LMFA02000318		1927
compound00091	7.47_497.2543m/z	M-H2O-H	C29H40O8	46.5	0	-0.26	Lucidenic acid E2		497.255	497.254	7.47	NEG	31639.4	30979.1	31525.1	0.0415338	0.0408497	0.0409733	0.0411189	ASPCIAWQVXVATP-VWXYMJEFSA-N	CC(CCC(=O)O)C1CC(=O)C2(C1(C(C(=O)C3=C2C(=O)CC4C3(CCC(C4(C)C)O)C)OC(=O)C)C)C	HMDB0036434	91569			23247892	98665-17-9	Terpenes	Triterpenes
compound00092	5.58_261.1118m/z	M+H-H2O	C15H18O5	54.2	0	-1.36	isohelenol		261.112	261.112	5.58	POS	5829.26	5874.25	5974.77	0.00765219	0.00774593	0.00776543	0.00772118	HNDYFBSTNFZJEB-JMLQNSIWSA-N	CC1CC2C(=C(C(=O)O2)CO)C(C3(C1C=CC3=O)C)O		67739		C09485	155585	71013-32-6
compound00093	7.36_515.0964m/z	2M-H	C14H10O5	54.3	0	-3.81	Isogentisin		515.098	515.096	7.36	NEG	21580.3	21385.3	21013.2	0.0283289	0.0281991	0.027311	0.0279463	FVIYCYAHKMJVJK-UHFFFAOYSA-N	COC1=CC2=C(OC3=CC(O)=CC(O)=C3C2=O)C=C1	HMDB0030871	68111		C10070	5281640	491-64-5
compound00094	6.46_353.0307m/z	M-H	C18H10O8	58.5	0	1.11	Isoeuphorbetin		353.03	353.031	6.46	NEG	32721.6	33284.7	32118.9	0.0429544	0.04389	0.041745	0.0428631	MCLQXBHUUFURBK-UHFFFAOYSA-N	C1=CC(=O)OC2=C(C(=C(C=C21)O)O)C3=C(C(=CC4=C3C=CC(=O)O4)O)O					71438018	50886-61-8
compound00095	4.47_479.1183m/z	M+FA-H	C21H22O10	41.6	0	-2.78	Isocoreopsin		479.12	479.118	4.47	NEG	2084.17	3170.05	3045.24	0.00273593	0.0041801	0.00395791	0.00362465	AWENDZQUFCJISN-ZRWXNEIDSA-N	O=C1C[C@@H](c2ccc(O)c(O)c2)Oc2cc(O[C@@H]3O[C@H](CO)[C@@H](O)[C@H](O)[C@H]3O)ccc21						30382-18-4	Flavonoids	Flavanones
compound00096	5.81_327.0874m/z	M-H	C18H16O6	51.7	0	0.01	isoamericanin a		327.087	327.087	5.81	NEG	10196.7	9127.92	9971.14	0.0133854	0.0120363	0.0129595	0.0127938	SDDXIQONGFZHJH-ZHEVZCJESA-N	C1=CC2=C(C=C1C=CC=O)OC(C(O2)CO)C3=CC(=C(C=C3)O)O	HMDB0033318	89172			11324912	109063-85-6
compound00097	12.50_469.2598m/z	M-H	C28H38O6	48.3	0	0.61	Ingenol-5,20-acetonide-3-O-angelic acid		469.26	469.26	12.5	NEG	19826.6	23559.4	21576.3	0.0260268	0.0310659	0.0280429	0.0283786	STFFIQHUWFISBB-ZFUJAFNPSA-N	CC=C(C)C(=O)O[C@H]1C(C)=C[C@]23C(=O)[C@@H](C=C4COC(C)(C)O[C@H]4C12O)[C@H]1[C@@H](C[C@H]3C)C1(C)C						87980-68-5	Terpenes	Diterpenes
compound00098	13.24_609.4125m/z	M+Na	C36H58O6	57.3	0	-0.18	ingenol-3-hexadecanoate		609.413	609.413	13.24	POS	33536.9	32778.3	36705.2	0.0440246	0.0432222	0.0477059	0.0449843	DOSPRDHNGNPKKJ-BYPUAWAASA-N	CCCCCCCCCCCCCCCC(=O)O[C@H]1C(=C[C@@]23[C@@]1([C@@H](C(=C[C@H](C2=O)[C@H]4[C@H](C4(C)C)C[C@H]3C)CO)O)O)C
compound00099	10.36_291.1604m/z	2M-H	C9H10N2	41.1	0	-3.73	Indole-3-methanamine		291.161	291.16	10.36	NEG	1716.22	2093.34	1878.26	0.00225292	0.00276033	0.00244118	0.00248481	JXYGLMATGAAIBU-UHFFFAOYSA-N	NCC1=CNC2=C1C=CC=C2	HMDB0029740	86458			472107	22259-53-6	Alkaloids
compound00100	6.30_535.3265m/z	2M-H	C15H24O4	50.8	0	-2.13	indicumolide C		535.328	535.327	6.3	NEG	11944.8	12581.3	11664.1	0.0156802	0.01659	0.0151599	0.0158101	COAQKOGOEILNMA-WLCDGYCFSA-N	CC1=C[C@H]2[C@@H](CC[C@@]([C@@H]2C[C@@H]1O)(C)O)C(C)C(=O)O
compound00101	0.71_133.0375n	M+H-H2O, M+H	C4H7NO4	43.1	18.4	-0.06	Iminodiacetic acid	58.0656, 70.0655, 72.0812, 74.0241, 88.0396, 88.0759, 90.0916	134.045	134.045	0.71	POS	44530	44903.5	43665.1	0.0584555	0.0592108	0.0567518	0.0581394	NBZBKCUXIYYUSX-UHFFFAOYSA-N	OC(=O)CNCC(O)=O	HMDB0011753	34481		C19911	8897	142-73-4	Amino Acids, Peptides and derivatives	Amino Acids
compound00102	10.80_338.2090n	M+H, M+Na	C19H30O5	43.3	7.57	-1.03	Idebenone	153.0541, 209.1168, 237.1116, 283.1533, 293.1744, 338.2753, 338.34, 339.1899, 339.2206	361.199	361.198	10.8	POS	138086	135308	139414	0.181269	0.178421	0.181196	0.180295	JGPMMRGNQUBGND-UHFFFAOYSA-N	COC1=C(OC)C(=O)C(CCCCCCCCCCO)=C(C)C1=O	HMDB0253376	757			3686	58186-27-9	Quinones	Benzoquinones
compound00103	6.72_263.1288m/z	M-H	C15H20O4	56.2	0	-0.19	hymenolin		263.129	263.129	6.72	NEG	1615.59	1630.09	1660.92	0.00212083	0.00214947	0.0021587	0.002143	OYBKYXUMZIXQDT-JWXRIFBJSA-N	CC1CCC2C(C(=O)OC2C3(C1(C=CC3=O)O)C)C		67735		C09481	88590	20555-05-9
compound00104	4.35_163.0393m/z	M-H2O-H	C9H10O4	47.8	34.7	-4.38	Hydroumbellic acid	118.9916, 119.0493, 142.9919, 162.8927, 163.0005, 163.0392	163.04	163.039	4.35	NEG	7959.12	8055.05	8138.01	0.0104481	0.0106216	0.010577	0.0105489	HMCMTJPPXSGYJY-UHFFFAOYSA-N	OC(=O)CCC1=C(O)C=C(O)C=C1	HMDB0126386				96384	5631-68-5	Phenylpropanoids	Simple phenylpropanoids
compound00105	5.01_393.0965m/z	M+K	C20H20NO5+	41.4	0	-2.39	Hydroprotopine		393.097	393.096	5.01	POS	4536.51	3612.49	2475.19	0.00595517	0.00476351	0.00321701	0.00464523	SZMZXQWCICMUFH-UHFFFAOYSA-N	C[N+]12CCc3cc4c(cc3C1(O)Cc1ccc3c(c1C2)OCO3)OCO4						128397-41-1	Alkaloids
compound00106	6.84_595.0882m/z	2M-H	C16H10O6	55.2	0	0.05	Glyzaglabrin	159.0443, 347.0563, 389.0671, 391.0458, 401.066, 433.0573, 551.0976, 595.0889	595.088	595.088	6.84	NEG	143522	142554	137140	0.188404	0.187975	0.178241	0.184874	GRMSSCUVELGNHC-UHFFFAOYSA-N	C1(O)=CC2OC=C(C3C=CC4OCOC=4C=3O)C(=O)C=2C=C1	HMDB0033859	47604	LMPK12050085		5317777	65242-64-0
compound00107	4.86_395.1708m/z	2M-H	C10H14O4	41.8	0	-0.88	Guaifenesin		395.171	395.171	4.86	NEG	6526.68	7097.25	6822.97	0.00856771	0.0093586	0.00886784	0.00893138	HSRJKNPTNIJEKV-UHFFFAOYSA-N	COC1=CC=CC=C1OCC(O)CO	HMDB0004998	4057			3516	93-14-1	Others
compound00108	10.38_455.3150m/z	M+Na	C27H44O4	51.2	0	4.32	guggulsterol-I		455.313	455.315	10.38	POS	4943.04	4864.72	4961.92	0.00648884	0.00641473	0.00644903	0.00645086	OOTWVICJYKMZRC-YUHDYOHUSA-N	CC(C)CC[C@H](C(C)([C@H]1[C@H](C[C@@H]2[C@@]1(CC[C@H]3[C@H]2CCC4=CC(=O)CC[C@]34C)C)O)O)O
compound00109	10.71_335.1986m/z	M+Na	C21H28O2	51.9	0	1.48	Guggulsterone		335.198	335.199	10.71	POS	2564.78	2559.97	2662.32	0.00336685	0.00337564	0.00346023	0.0034009	WDXRGPWQVHZTQJ-PXYKUDORSA-N	C/C=C1/C(=O)C[C@H]2[C@H]3CCC4=CC(=O)CC[C@]4(C)[C@@H]3CC[C@@]12C						95975-55-6	Steroids	Other steroids
compound00110	4.82_269.0442m/z	M-H2O-H	C15H12O6	41.4	0	-4.77	Isookanin		269.046	269.044	4.82	NEG	8549.14	7766.06	8249.49	0.0112226	0.0102405	0.0107219	0.0107283	ZPVNWCMRCGXRJD-ZDUSSCGKSA-N	C1C(OC2=C(C1=O)C=CC(=C2O)O)C3=CC(=C(C=C3)O)O		52585			91196552		Flavonoids	Flavanones
compound00111	6.13_533.1423m/z	M+K	C24H30O11	52.6	0	0.65	Harpagoside		533.142	533.142	6.13	POS	30064.5	29711.1	30905.9	0.0394663	0.0391777	0.0401686	0.0396042	KVRQGMOSZKPBNS-KGJABYPVSA-N	C[C@]1(OC(=O)/C=C\c2ccccc2)C[C@@H](O)[C@@]2(O)C=CO[C@@H](O[C@H]3O[C@@H](CO)[C@@H](O)[C@@H](O)[C@@H]3O)[C@@H]12						19210-12-9	Terpenes	Monoterpenes
compound00112	14.46_339.3268m/z	M-H	C22H44O2	50.1	0	-0.11	Henicosyl formate	339.1998, 339.3265	339.327	339.327	14.46	NEG	31.6369	289522	266849	4.15304e-05	0.38177	0.346824	0.242878	ZMGJNJFHZNMVCW-UHFFFAOYSA-N	CCCCCCCCCCCCCCCCCCCCCOC=O		354511			545651
compound00113	6.35_313.0702m/z	M+H-H2O	C17H14O7	51.2	0	-1.28	hildecarpin		313.071	313.07	6.35	POS	5254.64	5763.09	5515.09	0.00689788	0.00759934	0.00716798	0.00722173	DQXBSJMCLQLJKV-DLBZAZTESA-N	C1(O)=CC2OC[C@@]3(O)C4C=C5OCOC5=CC=4O[C@@]3([H])C=2C=C1OC		48217	LMPK12070129	C10424	442773
compound00114	8.37_447.1070m/z	M+H-H2O	C25H20O9	40.8	0	-0.91	Hydnocarpin		447.107	447.107	8.37	POS	26574.5	26569.6	27276.5	0.0348849	0.0350353	0.0354514	0.0351239	NMICSFNNFDNGEL-UHFFFAOYSA-N	COc1cc(C2Oc3ccc(-c4cc(=O)c5c(O)cc(O)cc5o4)cc3OC2CO)ccc1O						51419-48-8	Flavonoids	Flavones
compound00115	9.04_413.2335m/z	M-H2O-H	C25H36O6	46.7	0	0.27	Hydrocortisone 17-butyrate		413.233	413.233	9.04	NEG	13515.3	13164.3	13866.1	0.0177418	0.0173588	0.0180219	0.0177075	BMCQMVFGOVHVNG-TUFAYURCSA-N	CCCC(=O)OC1(CCC2C1(CC(C3C2CCC4=CC(=O)CCC34C)O)C)C(=O)CO		313564			26133		Steroids	Other steroids
compound00116	6.30_345.2051m/z	M+H-H2O	C21H30O5	57.7	0	-2.56	Hydrocortisone Impurity M		345.206	345.205	6.3	POS	6212.19	6289.98	6339.46	0.00815488	0.00829411	0.00823942	0.00822947	JYGXADMDTFJGBT-UHFFFAOYSA-N	CC12CC(O)C3C(CCC4=CC(=O)CCC34C)C1CCC2(O)C(=O)CO	HMDB0244354				3640
compound00117	6.75_297.0406m/z	M-H	C16H10O6	51.8	0	0.36	Hedysarimcoumestan B		297.041	297.041	6.75	NEG	1478.77	1586.65	1547.15	0.00194121	0.00209219	0.00201084	0.00201474	AAKHRTZXSZBLFQ-UHFFFAOYSA-N	COc1ccc2c(c1)oc1c3c(O)cc(O)cc3oc(=O)c21						899436-04-5	Flavonoids	Other flavonoids
compound00118	3.06_209.0086m/z	M+FA-H	C8H4O4-2	63.6	92	-3.3	Isophthalate	121.0286, 165.0185, 209.008	209.009	209.009	3.06	NEG	77031.8	81428.2	81209.4	0.101121	0.107373	0.105548	0.104681	QQVIHTHCMHWDBS-UHFFFAOYSA-L	C1=CC(=CC(=C1)C(=O)[O-])C(=O)[O-]					5461079	55185-18-7
compound00119	7.64_179.0706m/z	M-H	C10H12O3	59.2	46.5	-4.07	Isopropylparaben	59.0128, 71.0128, 89.0233, 93.0337, 135.0443, 136.0157, 137.0234, 178.9942, 179.0345, 179.0707	179.071	179.071	7.64	NEG	10966.6	11328.2	11612.8	0.0143961	0.0149376	0.0150932	0.014809	CMHMMKSPYOOVGI-UHFFFAOYSA-N	CC(C)OC(=O)C1=CC=C(O)C=C1	HMDB0253675	329269		C20343	20161		Others
compound00120	5.07_457.0889m/z	M+K	C21H22O9	41.2	0.285	-1.43	Liquiritin	411.2515, 439.2463, 457.0889	457.09	457.089	5.07	POS	119697	123725	136832	0.157128	0.163146	0.177841	0.166039	DEMKZLAVQYISIA-ZRWXNEIDSA-N	C1C(OC2=C(C1=O)C=CC(=C2)O)C3=CC=C(C=C3)OC4C(C(C(C(O4)CO)O)O)O		52511		C16989	503737		Flavonoids	Flavanones
compound00121	6.11_347.2214m/z	M+H-H2O	C21H32O5	50.9	0	-0.87	lineolone		347.222	347.221	6.11	POS	2030.66	2064.76	2039.05	0.00266569	0.00272263	0.00265016	0.00267949	YETBVMVJLDSXHU-OTKHHKLUSA-N	CC(=O)[C@@H]1CC[C@]2([C@@]1([C@@H](C[C@H]3[C@]2(CC=C4[C@@]3(CC[C@@H](C4)O)C)O)O)C)O
compound00122	9.82_243.1014m/z	M+H-H2O	C15H16O4	50.5	0	-0.79	Linderane		243.102	243.101	9.82	POS	3151.42	3235.79	3361.27	0.00413694	0.00426679	0.00436865	0.00425746	KBMSVODXFLAQNJ-YDHLFZDLSA-N	CC1=CCC[C@]23O[C@H]2[C@@H](OC3=O)c2c(C)coc2C1						13476-25-0	Terpenes	Sesquiterpenes
compound00123	5.86_331.0822m/z	M+FA-H	C16H14O5	50.7	0	-0.46	Licochalcone B		331.082	331.082	5.86	NEG	3236.79	2853.88	2543.63	0.00424901	0.00376319	0.00330597	0.00377272	DRDRYGIIYOPBBZ-XBXARRHUSA-N	C1(O)=CC=C(C(=O)/C=C/C2C=CC(O)=C(O)C=2OC)C=C1	HMDB0037320	52237	LMPK12120434		5318999	58749-23-8	Flavonoids	Chalcones
compound00124	0.73_162.0527n	M+H-H2O, M+NH4, M+H	C6H10O5	41.1	7.68	-0.64	Levoglucosan	103.0391, 114.0550, 116.0706, 118.0862, 144.0652, 146.0809, 162.0775, 162.1121, 162.1482, 163.0386	145.049	145.049	0.73	POS	70280.7	72281.6	70255.8	0.0922591	0.0953121	0.0913117	0.092961	TWNIBLMWSKIRAT-VFUOTHLCSA-N	[H][C@@]12OC[C@@H](O1)[C@@H](O)[C@H](O)[C@H]2O	HMDB0000640	4132			2724705	498-07-7	Carbohydrates and Glycosides	Carbohydrates
compound00125	4.33_287.0561m/z	M-H2O-H	C15H14O7	41.1	2.59	-0.16	Leucocyanidin	202.9981, 203.0342, 219.0296, 244.0374, 259.0606, 272.0327, 287.0561	287.056	287.056	4.33	NEG	58438.3	61536.7	63433.7	0.0767133	0.0811436	0.082445	0.0801006	SBZWTSHAFILOTE-SOUVJXGZSA-N	C1(O)=CC2O[C@H](C3C=C(O)C(O)=CC=3)[C@@H](O)[C@@H](O)C=2C(O)=C1		47419	LMPK12020203	C05906	440833		Flavonoids	Other flavonoids
compound00126	13.47_281.2485m/z	M-H	C18H34O2	58	0	-0.44	octadec-7-enoic acid	280.9841, 281.006, 281.2485	281.249	281.248	13.47	NEG	79212.7	81107	73895.5	0.103984	0.106949	0.0960423	0.102325	RVUCYJXFCAVHNC-UHFFFAOYSA-N	CCCCCCCCCCC=CCCCCCC(=O)O		73806			4602094
compound00127	4.21_243.1712m/z	M-H	C12H24N2O3	40.1	0	-0.94	Leu-Leu		243.171	243.171	4.21	NEG	1171.96	1323.61	1038.84	0.00153846	0.00174534	0.00135019	0.00154466	LCPYQJIKPJDLLB-UWVGGRQHSA-N	CC(C)C[C@H](N)C(=O)N[C@@H](CC(C)C)C(O)=O	HMDB0028933	23804		C11332	94244	3303-31-9	Amino Acids, Peptides and derivatives	Peptides
compound00128	9.18_199.1333m/z	M+FA-H	C10H18O	51.7	0	-4.2	Lavanduol		199.134	199.133	9.18	NEG	1245.63	1249.39	1316.01	0.00163517	0.00164747	0.00171043	0.00166436	CZVXBFUKBZRMKR-UHFFFAOYSA-N	CC(C)=CCC(CO)C(C)=C	HMDB0036041	91219			94060	498-16-8
compound00129	7.47_451.1972m/z	M+FA-H	C22H30O7	48.9	0	-0.37	Lasiokaurin		451.197	451.197	7.47	NEG	7701	8169.12	8036.61	0.0101093	0.010772	0.0104452	0.0104422	DJQLJZNVICMJRV-BADGCHFPSA-N	C=C1C(=O)C23[C@@H](CC[C@@H]1[C@H]2O)C12CO[C@]3(O)[C@H](O)[C@@H]1C(C)(C)CC[C@H]2OC(C)=O						28957-08-6	Terpenes	Diterpenes
compound00130	13.71_635.3805m/z	M+FA-H	C34H54O8	49	0	0.67	Lasalocid		635.38	635.38	13.71	NEG	101219	71593.8	63013.7	0.132872	0.0944052	0.0818991	0.103059	BBMULGJBVDDDNI-UHFFFAOYSA-N	CCC(C1OC(CC)(CC1C)C1CCC(O)(CC)C(C)O1)C(=O)C(C)C(O)C(C)CCC1=CC=C(C)C(O)=C1C(O)=O	HMDB0253985				3888		Phenols	Monophenols
compound00131	4.68_387.0722m/z	M-H2O-H	C19H18O10	45.8	0	0.18	Lancerin		387.072	387.072	4.68	NEG	4113.81	3474.98	3364.16	0.00540029	0.00458219	0.00437241	0.00478496	JUZGXATTXYZBGK-HBVDJMOISA-N	C1=CC2=C(C=C1O)C(=O)C3=C(O2)C(=C(C=C3O)O)C4C(C(C(C(O4)CO)O)O)O		68114		C10075	5281645	81991-99-3	Phenylpropanoids	Xanthones
compound00132	8.99_172.1695m/z	M+NH4	C10H18O	57.7	3.57	-0.65	L-Borneol	102.0913, 107.9502, 130.9663, 131.9295, 145.0968, 148.9767, 171.1490, 171.9926, 172.0950, 172.1690	172.17	172.169	8.99	POS	5960.33	6113.14	6244.63	0.00782426	0.00806093	0.00811617	0.00800045	DTGKSKDOIYIVQL-NQMVMOMDSA-N	CC1(C)[C@@H]2CC[C@]1(C)[C@H](O)C2						464-45-9	Terpenes	Monoterpenes
compound00133	5.02_191.0344m/z	M-H	C10H8O4	52.9	0	-3.1	Isoscopoletin		191.035	191.034	5.02	NEG	7706.65	7303.87	7142.25	0.0101167	0.00963104	0.00928281	0.00967685	SYTYLPHCLSSCOJ-UHFFFAOYSA-N	COC1=C(C=C2C=CC(=O)OC2=C1)O		72016		C18079	69894	776-86-3	Phenylpropanoids	Coumarins
compound00134	6.94_463.1037m/z	M-H2O-H	C25H22O10	44.8	1.19	0.59	Isosilybin B	243.0301, 259.0610, 283.0598, 285.0400, 327.0518, 335.0928, 341.0686, 379.0838, 405.0612, 463.1050	463.103	463.104	6.94	NEG	703088	705883	698455	0.922959	0.930794	0.907784	0.920513	FDQAOULAVFHKBX-WAABAYLZSA-N	C1(O)C=C(O)C2C(=O)[C@H](O)[C@](C3=CC4O[C@@H](CO)[C@H](C5=CC=C(O)C(OC)=C5)OC=4C=C3)([H])OC=2C=1			LMPK12140714		10885340		Flavonoids	Flavanones
compound00135	4.65_153.0547m/z	M+H	C8H8O3	40.5	0	0.34	Isovanillin		153.055	153.055	4.65	POS	6969.75	6968.58	7274.07	0.00914934	0.00918893	0.00945414	0.00926414	JVTZFYYHCGSXJV-UHFFFAOYSA-N	COC1=C(C=C(C=C1)C=O)O		324054			12127		Phenols	Monophenols
compound00136	7.68_248.1412n	M+H-H2O, M+Na	C15H20O3	50.1	26.2	-0.14	Ivangustin	121.0648, 123.0804, 147.1171, 149.0593, 175.0750, 185.1322, 187.1074, 213.1271, 231.0631, 231.1378	231.138	231.138	7.68	POS	48788.9	49150.9	48299.4	0.0640463	0.0648114	0.062775	0.0638776	BGEGQRAHHFWWJT-BPGGGUHBSA-N	C=C2C(=O)O[C@@H]3C[C@]1(C)C(=C(C)CC[C@H]1O)C[C@H]23						14164-59-1	Terpenes	Sesquiterpenes
compound00137	3.77_345.1555m/z	M-H	C16H26O8	40.3	0.0137	0.11	Jasminoside B	277.0307, 277.0643, 281.1388, 299.1158, 299.1480, 299.9565, 317.9648, 345.0197, 345.1161, 345.1590	345.156	345.156	3.77	NEG	43063.1	44893.1	42966.6	0.0565298	0.059197	0.0558439	0.0571902	XBRXLXOCHNGHBC-UHFFFAOYSA-N	CC1(C)CC(=O)C=C(COC2OC(CO)C(O)C(O)C2O)C1CO						214125-04-9	Terpenes	Monoterpenes
compound00138	7.81_491.0993m/z	2M-H	C13H10O5	41.2	0	1.86	Isopimpinellin		491.098	491.099	7.81	NEG	42428.4	43165.4	43480.6	0.0556967	0.0569189	0.056512	0.0563759	DFMAXQKDIGCMTL-UHFFFAOYSA-N	COC1=C2OC=CC2=C(OC)C2=C1OC(=O)C=C2	HMDB0034312	43730		C02162	68079	482-27-9	Phenylpropanoids	Coumarins
compound00139	8.86_177.0545m/z	M+H-H2O	C10H10O4	55.7	0	-0.38	Kakuol		177.055	177.054	8.86	POS	6812.66	6980.02	7103.96	0.00894312	0.00920402	0.00923304	0.00912673	SLLMHZXMVHNZOR-UHFFFAOYSA-N	CCC(=O)C1=CC2=C(C=C1O)OCO2		71480		C16982	596894	18607-90-4	Phenols	Monophenols
compound00140	8.53_275.0925m/z	M+FA-H	C14H14O3	47.5	0	-0.15	Kavain		275.092	275.092	8.53	NEG	2049.44	2305.83	1978.46	0.00269034	0.00304052	0.00257141	0.00276742	XEAQIWGXBXCYFX-GUOLPTJISA-N	COC1=CC(=O)OC(C1)C=CC2=CC=CC=C2		68034		C09947	5281565	500-64-1	Others
compound00141	4.19_259.1186m/z	2M-H	C6H10O3	42.4	0	-0.27	Ketoisoleucine		259.119	259.119	4.19	NEG	40029.5	41139.4	41110.1	0.0525476	0.0542473	0.053431	0.0534086	JVQYSWDUAOAHFM-UHFFFAOYSA-N	CCC(C)C(=O)C(=O)O	HMDB0000491	122		C03465	47	1460-34-0	Carboxylic acid and derivatives
compound00142	7.97_555.2577m/z	M+FA-H	C30H38O7	53.4	72.3	-4.42	kidjolanin	61.9873, 429.2298, 433.1987, 451.2096, 487.27, 509.2515, 555.2565	555.26	555.258	7.97	NEG	514612	520498	520238	0.675542	0.686341	0.676156	0.679346	NXDYHYDLOHUSEW-HTGUHCDGSA-N	CC(=O)[C@]1(CC[C@]2([C@@]1([C@@H](C[C@H]3[C@]2(CC=C4[C@@]3(CC[C@@H](C4)O)C)O)OC(=O)/C=C/C5=CC=CC=C5)C)O)O
compound00143	1.11_264.0845n	M-H, M+FA-H, M-H2O-H	C10H16O8	40	0	-0.03	Kinsenoside		263.077	263.077	1.11	NEG	13344.9	12750.7	13244	0.0175181	0.0168134	0.0172133	0.0171816	MQEPWBMWFIVRPS-ZGSHZZHUSA-N	C1C(COC1=O)OC2C(C(C(C(O2)CO)O)O)O		432462			10422896		Carbohydrates and Glycosides	Glycosides
compound00144	6.17_383.2438m/z	M+FA-H	C20H34O4	44.6	0	-0.37	Kirenol		383.244	383.244	6.17	NEG	4264.11	3649.15	5255.2	0.00559759	0.00481185	0.0068302	0.00574655	NRYNTARIOIRWAB-JPDRSCFKSA-N	CC1(CCC2C(=C1)CCC3C2(CC(CC3(C)CO)O)C)C(CO)O		84974			15736732	52659-56-0	Terpenes	Diterpenes
compound00145	10.93_277.1796m/z	M+H	C17H24O3	42	0	-0.7	Kissoone C		277.18	277.18	10.93	POS	8622.67	9358.86	8604.78	0.0113192	0.0123408	0.0111837	0.0116145	MQNYOYOQPDJLJV-PEXFBTPGSA-N	CC(=O)OC/C1=C/CCC(=O)/C=C\[C@H]2[C@@H](CC1)C2(C)C						903559-03-5	Terpenes	Sesquiterpenes
compound00146	12.10_307.2628m/z	M+H	C20H34O2	40.9	0	-1.24	Kauran-16,17-Diol		307.263	307.263	12.1	POS	1767.56	1119.14	1971.38	0.00232031	0.00147572	0.0025622	0.00211941	LCYWCTWYVKIBSA-IXLJNHQZSA-N	CC1(C)CCC[C@@]2(C)C3CC[C@H]4CC3(CC[C@H]12)C[C@]4(O)CO						16836-31-0	Terpenes	Diterpenes
compound00147	13.43_282.2572n	M+H, M+Na	C18H34O2	50.1	0	4.59	octadec-8-enoic acid		305.245	305.246	13.43	POS	25218.9	26316.6	24754.9	0.0331054	0.0347016	0.032174	0.033327	WRIDQFICGBMAFQ-UHFFFAOYSA-N	CCCCCCCCCC=CCCCCCCC(=O)O					5282758	2197-55-9
compound00148	4.09_371.0986m/z	M+FA-H	C15H18O8	52.2	0	0.61	p-Coumaroyl-b-D-glucose		371.098	371.099	4.09	NEG	2007.87	2102.86	2546.78	0.00263577	0.00277288	0.00331006	0.00290624	DSNCQKUYZOSARM-UHFFFAOYSA-N	O=C(OC1OC(CO)C(O)C(O)C1O)C=CC2=CC=C(O)C=C2
compound00149	3.83_207.0633m/z	M+Na	C9H12O4	51.7	0	2.58	Syringyl alcohol		207.063	207.063	3.83	POS	9271.48	8185.44	8370.61	0.0121709	0.0107935	0.0108793	0.0112812	LUOAEJWSKPQLJD-UHFFFAOYSA-N	COC1=CC(=CC(=C1O)OC)CO					10741
compound00150	4.97_183.0653m/z	M+H	C9H10O4	40.5	0	0.42	Syringaldehyde		183.065	183.065	4.97	POS	7240.92	7206.87	7433.88	0.00950532	0.00950315	0.00966185	0.00955677	KCDXJAYRVLXPFO-UHFFFAOYSA-N	COC1=CC(C=O)=CC(OC)=C1O	HMDB0258653	335983			8655		Phenols	Monophenols
compound00151	5.15_475.0656m/z	M+K	C20H20O11	40.2	0	4.27	Swertianolin		475.064	475.066	5.15	POS	56801.5	58020.3	56786.6	0.0745645	0.0765069	0.0738057	0.0749591	XMVBNLMKPMPWAX-DIKOWXHZSA-N	COC1=CC(=C2C(=C1)OC3=C(C=CC(=C3C2=O)OC4C(C(C(C(O4)CO)O)O)O)O)O		68127		C10093	5281662	23445-00-3	Phenylpropanoids	Xanthones
compound00152	4.24_373.1145m/z	M-H	C16H22O10	52.5	0	1.22	Swertiamarin		373.114	373.115	4.24	NEG	2328.36	2661.53	2735.26	0.00305648	0.00350956	0.00355503	0.00337369	HEYZWPRKKUGDCR-QBXMEVCASA-N	C=CC1C(OC=C2C1(CCOC2=O)O)OC3C(C(C(C(O3)CO)O)O)O		67944		C09800	442435	17388-39-5	Terpenes	Monoterpenes
compound00153	4.62_501.0793m/z	M+K	C22H22O11	44.2	0	-0.21	Swertiajaponin		501.079	501.079	4.62	POS	50882	52249.7	51429.5	0.0667939	0.0688976	0.0668432	0.0675116	DLVLXOYLQKCAME-UHFFFAOYSA-N	COC1=CC2=C(C(=O)C=C(O2)C2=CC(O)=C(O)C=C2)C(O)=C1C1OC(CO)C(O)C(O)C1O	HMDB0030569			C10187	3556303	6980-25-2	Flavonoids	Flavones
compound00154	9.23_321.1705m/z	M+FA-H	C17H24O3	55.8	0	-0.79	sugeonyl acetate		321.171	321.171	9.23	NEG	2094.34	1810.53	2058.83	0.00274929	0.00238741	0.00267587	0.00260419	FHGRIGPOCXOGPU-LUBMOKJXSA-N	CC1CCC2C(C3=C(C(=O)CC13C2(C)C)C)OC(=O)C		53457		C17506	46173924
compound00155	8.19_461.2546m/z	M-H2O-H	C26H40O8	40.1	0	0.29	Steviol-19-O-Glucoside		461.255	461.255	8.19	NEG	13074.1	14145.8	13141.5	0.0171627	0.0186529	0.0170801	0.0176319	OQPOFZJZPYRNFF-CULFPKEHSA-N	[C@@]123CC([C@](O)(CC[C@@]1([H])[C@]1(C)CCC[C@@](C)(C(O[C@H]4[C@H](O)[C@@H](O)[C@H](O)[C@@H](CO)O4)=O)[C@@]1([H])CC2)C3)=C			LMPR01040121		152758		Terpenes	Diterpenes
compound00156	4.83_385.1871m/z	M-H2O-H	C19H32O9	50	0	0.7	staphylionoside c		385.187	385.187	4.83	NEG	7906.49	7554.85	7282.41	0.010379	0.009962	0.00946497	0.00993533	JNLJEAYKDJYBAA-YKTJNLDLSA-N	C[C@@H](/C=C/[C@]12[C@](O1)([C@H]([C@H](CC2(C)C)O)O)C)O[C@H]3[C@@H]([C@H]([C@@H]([C@H](O3)CO)O)O)O
compound00157	4.72_387.2027m/z	M-H2O-H	C19H34O9	50	0	0.56	staphylionoside b		387.202	387.203	4.72	NEG	1811.36	2019.1	1717.61	0.00237781	0.00266243	0.00223238	0.00242421	FKLUOSPYDPNATQ-UHFFFAOYSA-N	CC(C=CC1C(CC(C(C1(C)O)O)O)(C)C)OC2C(C(C(C(O2)CO)O)O)O
compound00158	0.75_144.1019m/z	M+H	C7H13NO2	41.4	6.13	-0.34	Stachydrine	126.494, 144.1016	144.102	144.102	0.75	POS	389891	411549	411853	0.511818	0.542678	0.535288	0.529928	CMUNUTVVOOHQPW-LURJTMIESA-N	C[N+]1(C)CCC[C@H]1C([O-])=O	HMDB0004827	7089		C10172	115244	471-87-4	Alkaloids
compound00159	4.92_473.0842m/z	M+K	C21H22O10	50.3	0	-0.66	tadehaginoside	473.0837	473.084	473.084	4.92	POS	668698	683022	662403	0.877815	0.900648	0.860928	0.879797	XUJRENMDCSKMFE-UHFFFAOYSA-N	C1=CC(=CC=C1C=CC(=O)OCC2C(C(C(C(O2)OC3=CC(=CC(=C3)O)O)O)O)O)O
compound00160	11.28_489.1692m/z	M+K	C27H30O6	43.2	0	3.9	Sofalcone		489.167	489.169	11.28	POS	14125.1	9617.22	8861.07	0.0185423	0.0126815	0.0115168	0.0142469	GFWRVVCDTLRWPK-KPKJPENVSA-N	CC(C)=CCOC1=CC=C(\C=C\C(=O)C2=C(OCC(O)=O)C=C(OCC=C(C)C)C=C2)C=C1	HMDB0042013	96206			5282219	64506-49-6	Others
compound00161	4.76_424.1370n	M+H, M+Na, M+H-H2O	C20H24O10	57.6	0	0.15	Smyrindioloside		447.126	447.126	4.76	POS	24829.3	25036.6	23440.8	0.032594	0.0330139	0.0304662	0.0320247	KLPNFWKZLQAVTH-LDCXIIFCSA-N	CC(C)(C1C(C2=C(O1)C=C3C(=C2)C=CC(=O)O3)O)OC4C(C(C(C(O4)CO)O)O)O	HMDB0039037	93643			10836072	87592-77-6	Phenylpropanoids	Coumarins
compound00162	10.99_519.3693m/z	M+FA-H	C30H50O4	52.2	0	0.47	SMR000232320		519.369	519.369	10.99	NEG	3988.51	3243.79	3331.13	0.00523581	0.00427733	0.00432948	0.00461421	DCGUKHULKAAOPB-QBLSGNHRSA-N	C[C@@H](C[C@H]([C@@H](C(C)(C)O)O)O)[C@@H]1CC[C@]2([C@]1(CC[C@H]3C2=CC[C@@H]4[C@@]3(CCC(=O)C4(C)C)C)C)C
compound00163	4.15_324.0833n	M+H, M+Na, M+H-H2O	C15H16O8	40.4	0	-3.85	Skimmin		307.081	307.08	4.15	POS	27107.5	26966.2	27383.3	0.0355847	0.0355582	0.0355901	0.0355777	VPAOSFFTKWUGAD-TVKJYDDYSA-N	O=C1OC=2C=C(OC3OC(CO)C(O)C(O)C3O)C=CC2C=C1							Phenylpropanoids	Coumarins
compound00164	9.38_456.2871n	M+NH4, M+Na	C28H40O5	57.9	0	-1.02	siraitic acid D	93.0701, 333.2416, 439.2839, 457.2932, 474.2592	479.277	479.276	9.38	POS	2.15369e+06	2.19143e+06	2.20342e+06	2.82719	2.88968	2.86379	2.86022	OAKCRDTXMOBPDZ-UHFFFAOYSA-N	CC1=C2CCC3C(C2CCC1=O)C(=O)CC4(C3(CCC4C(C)(CCC=C(C)C(=O)O)O)C)C						214962-61-5
compound00165	5.07_207.0652m/z	M+H-H2O	C11H12O5	56.9	0	0.19	Sinapinic acid		207.065	207.065	5.07	POS	4409.73	4332.95	4111.29	0.00578875	0.00571353	0.00534346	0.00561525	PCMORTLOPMLEFB-ONEGZZNKSA-N	COC1=CC(\C=C\C(O)=O)=CC(OC)=C1O	HMDB0032616	45738		C00482	637775	7362-37-0	Phenylpropanoids	Simple phenylpropanoids
compound00166	5.91_482.1216n	M+H, M+Na	C25H22O10	48.8	38.7	0.66	Silydianin	163.0387, 247.0595, 367.0796, 392.0869, 409.089, 465.1182, 483.1276	483.129	483.129	5.91	POS	97642.1	95404.4	101058	0.128177	0.125802	0.131346	0.128442	CYGIJEJDYJOUAN-JSGXPVSSSA-N	C1(O)C=C(O)C2C(=O)[C@H](O)[C@](C3[C@H]4[C@]5([C@@]([H])(C6=CC(OC)=C(O)C=C6)[C@H](C(=O)[C@]4(O)OC5)C=3)[H])([H])OC=2C=1		984142	LMPK12140715		11982272		Flavonoids	Flavanones
compound00167	12.80_425.3775m/z	M+H-H2O	C30H50O2	56.1	0	-0.61	Serratenediol		425.378	425.377	12.8	POS	63841.5	64962.7	67149.7	0.0838061	0.0856613	0.0872747	0.0855807	FMUNNDDBCLRMSL-UHFFFAOYSA-N	CC1(C2CCC3(CC4=CCC5C(C(CCC5(C4CCC3C2(CCC1O)C)C)O)(C)C)C)C
compound00168	7.97_207.1020m/z	M-H	C12H16O3	54.9	18.6	-3.02	Senkyunolide G	73.0284, 109.0285, 161.0446, 179.1071, 186.9985, 206.9882, 207.102	207.103	207.102	7.97	NEG	11713.5	12098.6	11788.3	0.0153766	0.0159534	0.0153213	0.0155504	JGIFAEPLZJPSHA-UHFFFAOYSA-N	CCCCC1(C2=C(C=CCC2)C(=O)O1)O					10013283	94530-85-5
compound00169	12.28_511.3425m/z	M-H	C32H48O5	52.7	0	-0.73	sendanone acetate		511.343	511.342	12.28	NEG	5101.12	4036.4	4091	0.00669636	0.00532249	0.0053171	0.00577865	YIEYBMFKRXRFGE-UHFFFAOYSA-N	CC(=O)OC1C(CC(O1)C2C(O2)(C)C)C3CCC4(C3(CCC5C4=CCC6C5(CCC(=O)C6(C)C)C)C)C
compound00170	4.89_507.2208m/z	M+H-H2O	C26H36O11	47.7	0	-3.27	Secoisolariciresinol monoglucoside		507.222	507.221	4.89	POS	4755.7	5188.78	4561.2	0.00624291	0.00684205	0.00592821	0.00633772	DRLPXFRWJUZTMG-DNABOVRESA-N	COc1cc(C[C@@H](CO)[C@H](CO[C@@H]2O[C@H](CO)[C@@H](O)[C@H](O)[C@H]2O)Cc2ccc(O)c(OC)c2)ccc1O						63320-67-2	Phenylpropanoids	Lignans
compound00171	7.05_431.0770m/z	2M-H	C12H8O4	41.6	0	-0.66	Sphondin		431.077	431.077	7.05	NEG	5188.33	5033.14	4839.79	0.00681084	0.00663681	0.00629029	0.00657931	DLCJNIBLOSKIQW-UHFFFAOYSA-N	COC1=C2OC=CC2=C2OC(=O)C=CC2=C1	HMDB0302839	44478		C18081	108104	483-66-9	Phenylpropanoids	Coumarins
compound00172	9.38_372.1205n	M+H, M+Na	C20H20O7	40.9	0	-1.19	Tangeretin		373.128	373.128	9.38	POS	17437.6	18131.4	17728.7	0.0228907	0.0239085	0.0230421	0.0232804	ULSUXBXHSYSGDT-UHFFFAOYSA-N	C1(OC)=C(OC)C2OC(C3C=CC(OC)=CC=3)=CC(=O)C=2C(OC)=C1OC	HMDB0030539	44437	LMPK12111443	C10190	68077	481-53-8	Flavonoids	Flavones
compound00173	8.76_262.1202n	M+H-H2O, M+Na, M+H	C15H18O4	56.6	0	-1.02	taraxinic acid	203.1063, 217.1218, 245.1172	245.117	245.117	8.76	POS	483567	495547	481567	0.634789	0.65344	0.625895	0.638041	KZWCOWFKXMTBRH-IMDCMVKOSA-N	C\C1=C\C2OC(=O)C(=C)C2CC\C(=C/CC1)C(O)=O	HMDB0303482
compound00174	8.11_131.0856m/z	M+H-H2O	C10H12O	53.9	0	0.16	Tarragon		131.085	131.086	8.11	POS	2451.55	2535.51	2565.93	0.0032182	0.00334338	0.00333495	0.00329884	ZFMSMUAANRJZFM-UHFFFAOYSA-N	COC1=CC=C(CC=C)C=C1	HMDB0034121	68335		C10452	8815	140-67-0
compound00175	6.91_287.1251m/z	M+Na	C15H20O4	40.7	0	-0.94	Zedoarofuran		287.125	287.125	6.91	POS	5393.42	5527.5	5527.76	0.00708006	0.00728869	0.00718445	0.0071844	QXEXMTIZXNCRJO-BSLXNSKLSA-N	CC1=COC2=C1C(=O)[C@@H]3[C@](CC[C@@H]([C@]3(C2)C)O)(C)O						213833-34-2	Terpenes	Sesquiterpenes
compound00176	0.71_432.1706m/z	M+NH4	C15H26O13	41.3	8.3	-1.42	Xylotriose	90.0552, 334.9811	432.171	432.171	0.71	POS	562290	526563	537849	0.73813	0.694337	0.699045	0.710504	JCSJTDYCNQHPRJ-FDVJSPBESA-N	OC1OC[C@@H](O[C@@H]2OC[C@@H](O[C@@H]3OC[C@@H](O)[C@H](O)[C@H]3O)[C@H](O)[C@H]2O)[C@H](O)[C@H]1O						47592-59-6	Carbohydrates and Glycosides	Carbohydrates
compound00177	5.54_247.0245m/z	M+FA-H	C11H6O4	42.3	4.85	-1.38	Xanthotoxol	175.0393, 219.0294, 247.0246	247.025	247.024	5.54	NEG	126039	126247	130107	0.165454	0.166472	0.169101	0.167009	JWVYQQGERKEAHW-UHFFFAOYSA-N	[H]OC1=C2OC(=O)C([H])=C([H])C2=C([H])C2=C1OC([H])=C2[H]	HMDB0029457	449370		C00841	65090	2009-24-7	Phenylpropanoids	Coumarins
compound00178	9.81_467.2440m/z	M-H	C28H36O6	53.6	0	0.15	withaphysalin b	394.1773, 399.3483, 405.2423, 409.2020, 423.2523, 426.9908, 446.9983, 467.0062, 467.0733, 467.2435	467.244	467.244	9.81	NEG	62373.5	66206	65544.8	0.081879	0.0873007	0.0851889	0.0847895	MXOCXQXKLBHAGC-AWZDPCJNSA-N	CC1=C(C(=O)O[C@H](C1)[C@]2([C@H]3CC[C@@H]4[C@@]3(CC[C@H]5[C@H]4C[C@@H]6[C@]7([C@@]5(C(=O)C=CC7)C)O6)C(O2)O)C)C
compound00179	8.50_473.2911m/z	M-H	C28H42O6	53.9	0	0.43	Withametelin C	61.9873, 341.2483, 414.2364, 415.2487, 472.2755, 473.2907	473.291	473.291	8.5	NEG	1.45625e+06	1.44175e+06	1.45075e+06	1.91165	1.90113	1.88554	1.89944	WJIFGCPZQNCQCO-MCMIQRFLSA-N	CC1=C(C(=O)O[C@H](C1)[C@@H](CO)[C@H]2CC[C@@H]3[C@@]2(CC[C@H]4[C@H]3C[C@H]([C@@]5([C@@]4(C(=O)CCC5)C)O)O)C)C
compound00180	12.98_453.3373m/z	M-H	C30H46O3	50.1	0	-0.17	Wilforlide A		453.337	453.337	12.98	NEG	34110.2	31888.2	32112.3	0.0447773	0.0420485	0.0417365	0.0428541	HHQJBWYXBWOFJY-YLXTXNMFSA-N	CC1(C)[C@@H](O)CC[C@@]2(C)[C@H]1CC[C@]1(C)[C@@H]2CC=C2[C@@H]3C[C@@]4(C)C[C@H](OC4=O)[C@]3(C)CC[C@]21C						84104-71-2	Terpenes	Triterpenes
compound00181	7.13_263.1288m/z	M-H2O-H	C15H22O5	52.9	0	-0.36	wenjine		263.129	263.129	7.13	NEG	3114.22	3035.8	2898.58	0.00408811	0.00400308	0.0037673	0.00395283	KQFWIVNLLMSUTP-LDYQCGSLSA-N	C[C@]12CC[C@H]3[C@](O3)(C[C@]4(/C(=C\[C@H]1O2)/C(OO4)(C)C)O)C
compound00182	5.35_493.1029m/z	M+K	C28H22O6	43.6	0	-4.16	Viniferin		493.105	493.103	5.35	POS	46096.9	43679.4	47026.4	0.0605124	0.0575966	0.0611203	0.0597431	FQWLMRXWKZGLFI-UHFFFAOYSA-N	OC1=CC=C(C=CC2=CC(O)=CC3=C2C(C(O3)C2=CC=C(O)C=C2)C2=CC(O)=CC(O)=C2)C=C1	HMDB0259817				366354		Phenylpropanoids	Stilbenoids
compound00183	11.05_322.2735m/z	M+NH4	C20H32O2	52.4	0	-1.84	vibsanin F		322.274	322.274	11.05	POS	3825.82	4493.85	3875.55	0.00502223	0.00592569	0.00503707	0.00532833	KUZQLAIQYSJYPN-JNCGCJCPSA-N	CC(=CCCC/1(C/C=C(\CCC2C(O2)(C/C=C1)C)/CO)C)C
compound00184	4.57_427.1006m/z	M+K	C17H24O10	41.6	0	1.4	Verbenalin		427.1	427.101	4.57	POS	18556.2	18569.6	18931.9	0.0243591	0.0244862	0.0246058	0.0244837	HLXRWTJXGMHOFN-XJSNKYLASA-N	O([C@@H]1OC=C(C(=O)OC)[C@@]2([H])C(C[C@H](C)[C@]21[H])=O)[C@H]1[C@H](O)[C@H]([C@H](O)[C@H](O1)CO)O	HMDB0301853	41161	LMPR0102070016	C09802	73467		Terpenes	Monoterpenes
compound00185	5.02_289.0352m/z	M+FA-H	C13H8O5	46.8	29.9	-0.73	Urolithin C	217.0138, 271.0247, 289.0356	289.035	289.035	5.02	NEG	34579.1	32984.1	33686.6	0.0453927	0.0434936	0.0437827	0.044223	HHXMEXZVPJFAIJ-UHFFFAOYSA-N	OC1=CC2=C(C=C1)C1=C(C=C(O)C(O)=C1)C(=O)O2	HMDB0029218	86097			60198001		Phenylpropanoids	Coumarins
compound00186	4.96_275.0925m/z	M-H2O-H	C15H18O6	54.3	0	0.06	tutin		275.092	275.092	4.96	NEG	1069.51	795.341	1182.86	0.00140396	0.00104876	0.00153736	0.00133003	CCAZWUJBLXKBAY-ULZPOIKGSA-N	[C@]12(C)[C@]3(OC3)[C@@H]3O[C@@H]3[C@@]1(O)[C@H]1C(=O)O[C@@H]([C@H]2O)[C@H]1C(=C)C		67812	LMPR0103540004	C09570	75729	2571-22-4
compound00187	0.73_342.1158n	M+H-H2O, M+H	C12H22O11	45.1	28.8	-1.35	Turanose	69.034, 85.0288, 97.0286, 109.0285, 127.0389, 142.9479, 145.0493, 163.0599, 325.1029	325.113	325.113	0.73	POS	743509	707505	727869	0.97602	0.932932	0.946015	0.951656	RULSWEULPANCDV-PIXUTMIVSA-N	OC[C@@H](O)[C@@H](O)[C@H](O[C@H]1O[C@H](CO)[C@@H](O)[C@H](O)[C@H]1O)C(=O)CO	HMDB0011740	62463		C19636	5460935	547-25-1	Carbohydrates and Glycosides	Carbohydrates
compound00188	5.07_287.0545m/z	M+H-H2O	C15H12O7	54.4	0	-1.76	Taxifolin		287.055	287.055	5.07	POS	3273.4	3710.22	3171.14	0.00429706	0.00489238	0.00412154	0.00443699	CXQWRCVTCMQVQX-LSDHHAIUSA-N	C1(O)C=C(O)C2C(=O)[C@@H]([C@@H](C3=CC=C(O)C(O)=C3)OC=2C=1)O	HMDB0303943	3434	LMPK12140721	C01617	439533	480-18-2	Flavonoids	Flavanones
compound00189	4.60_450.1161n	M+H, M+Na	C21H22O11	42.6	0	-0.29	Taxifolin 7-O-rhamnoside		473.105	473.105	4.6	POS	15156.2	15929.7	16083.3	0.0198959	0.0210053	0.0209036	0.0206016	HNGAZJABJOAMSW-FHXNIQKESA-N	C[C@@H]1O[C@@H](Oc2cc(O)c3c(c2)O[C@H](c2ccc(O)c(O)c2)[C@@H](O)C3=O)[C@H](O)[C@H](O)[C@H]1O						137592-12-2	Flavonoids	Flavanonols
compound00190	5.23_633.1218m/z	M+K	C27H30O15	41.6	0	0.24	Ternatumoside II		633.122	633.122	5.23	POS	9052.7	8441.98	7856.75	0.0118837	0.0111318	0.0102115	0.0110756	YFPYXTNSQOUHPS-BJFAUXDDSA-N	C[C@H]1O[C@@H](O[C@@H]2[C@@H](O)[C@H](CO)O[C@@H](Oc3c(-c4ccc(O)cc4)oc4cc(O)cc(O)c4c3=O)[C@@H]2O)[C@H](O)[C@@H](O)[C@@H]1O						1473419-87-2	Flavonoids	Flavonols
compound00191	6.94_363.2176m/z	M-H	C21H32O5	41.9	0	-0.35	Tetrahydrocortisone		363.218	363.218	6.94	NEG	2349.72	2649.67	2003.31	0.00308452	0.00349392	0.00260371	0.00306072	SYGWGHVTLUBCEM-SDYDLROXSA-N	[H][C@@]12CC[C@](O)(C(=O)CO)[C@@]1(C)CC(=O)[C@@]1([H])[C@@]2([H])CC[C@@]2([H])C[C@@H](O)CC[C@]12C	HMDB0000903	1915			12444617	53-05-4	Steroids	Other steroids
compound00192	5.51_547.1240m/z	M+H-H2O	C29H24O12	41.6	0	0.91	Theaflavin		547.124	547.124	5.51	POS	10615.6	11573.3	10858.2	0.0139354	0.0152608	0.0141125	0.0144362	IPMYMEWFZKHGAX-ZKSIBHASSA-N	O[C@@H]1CC2=C(O)C=C(O)C=C2O[C@@H]1C1=CC(O)=C(O)C2=C(O)C(=O)C=C(C=C12)[C@H]1OC2=C(C[C@H]1O)C(O)=CC(O)=C2	HMDB0005788				114777	4670-05-7	Flavonoids	Flavanols
compound00193	5.69_447.1067m/z	M+K	C20H24O9	40	0	3.81	Tinnevellin glucoside		447.105	447.107	5.69	POS	7057.62	9939.59	9525.68	0.00926469	0.0131066	0.0123806	0.0115839	FEZDDTIDMGTSLT-CZNQJBLBSA-N	COc1cc(O[C@@H]2O[C@H](CO)[C@@H](O)[C@H](O)[C@H]2O)cc2cc(C)c(C(C)=O)c(O)c12						80358-06-1	Quinones	Anthraquinones
compound00194	5.83_285.0401m/z	M-H	C15H10O6	50.5	47.8	-1.16	Scutellarein	242.0218, 243.0288, 285.0402	285.041	285.04	5.83	NEG	55267	52461	50935.8	0.0725502	0.0691762	0.0662015	0.0693093	JVXZRQGOGOXCEC-UHFFFAOYSA-N	C1(O)=CC2OC(C3C=CC(O)=CC=3)=CC(=O)C=2C(O)=C1O	HMDB0128587	49585	LMPK12111160	C10184	5281697		Flavonoids	Flavones
compound00195	5.00_403.1030m/z	M-H	C19H15F3N4O3	47	0	1.55	Tosufloxacin		403.102	403.103	5	NEG	31952.7	29981.6	31209.1	0.041945	0.0395344	0.0405626	0.0406807	WUWFMDMBOJLQIV-UHFFFAOYSA-N	O=C(O)C1=CN(C2=NC(=C(F)C=C2C1=O)N3CCC(N)C3)C4=CC=C(F)C=C4F							Others
compound00196	4.99_429.0824m/z	M-H2O-H	C21H20O11	47.1	0	-0.8	Trifolin		429.083	429.082	4.99	NEG	12306.9	13255.2	13438	0.0161555	0.0174786	0.0174655	0.0170332	JPUKWEQWGBDDQB-STUVATENSA-N	OC[C@@H]1O[C@H](OC2=C(OC3=CC(O)=CC(O)=C3C2=O)C2=CC=C(O)C=C2)[C@@H](O)[C@H](O)[C@@H]1O	HMDB0304745				12011805		Flavonoids	Flavonols
compound00197	10.56_326.0703n	M+H, M+Na	C18H15O4P	51.8	48.6	-1.37	Triphenyl phosphate	98.9843, 153.0696, 174.9919, 233.0359, 327.0775	327.078	327.078	10.56	POS	38043.1	36662.6	38284	0.04994	0.0483442	0.0497579	0.0493474	XZZNDPSIHUTMOC-UHFFFAOYSA-N	O=P(OC1=CC=CC=C1)(OC1=CC=CC=C1)OC1=CC=CC=C1	HMDB0259262	69897		C14235	8289	115-86-6	Others
compound00198	9.44_301.2158m/z	M+H-H2O	C20H30O3	45	14.8	-1.18	Tripterifordin	67.0548, 109.1013, 300.1931, 300.2887, 301.1037, 301.1401, 301.2168	301.216	301.216	9.44	POS	17776.8	18332	18245.3	0.023336	0.0241729	0.0237135	0.0237408	KLMZPLYXGZZBCX-XGRAKDAMSA-N	C[C@@]1(O)C[C@@]23CC[C@@H]4[C@@]5(C)CCC[C@@]4(COC5=O)[C@@H]2CC[C@H]1C3						139122-81-9	Terpenes	Diterpenes
compound00199	9.06_347.2214m/z	M+H	C21H30O4	41.4	0	-0.91	Triptonoterpenol		347.222	347.221	9.06	POS	3318.29	3435.28	3288.5	0.00435599	0.00452984	0.00427408	0.00438664	XGRBHDJWRPUKMD-DQLDELGASA-N	COc1c(C(C)C)cc(O)c2c1CC[C@@H]1[C@](C)(CO)C(=O)CC[C@@]21C						110187-23-0	Terpenes	Diterpenes
compound00200	7.29_295.1186m/z	M+FA-H	C14H18O4	44.7	0.0404	-0.54	Trolox	85.0283, 103.0391, 165.0912, 209.0813, 295.0603, 295.1186	295.119	295.119	7.29	NEG	76823.1	79314.2	78622	0.100847	0.104586	0.102185	0.102539	GLEVLJDDWXEYCO-UHFFFAOYSA-N	CC1=C(O)C(C)=C2CCC(C)(OC2=C1C)C(O)=O	HMDB0038804	45333			40634	56305-04-5	Phenols	Monophenols
compound00201	5.42_301.0349m/z	M-H	C15H10O7	45.6	0	-1.46	Tricetin		301.035	301.035	5.42	NEG	1182.1	1074.72	1437.33	0.00155177	0.00141715	0.0018681	0.00161234	ARSRJFRKVXALTF-UHFFFAOYSA-N	C12C(=O)C=C(C3C=C(O)C(O)=C(O)C=3)OC=1C=C(O)C=C2O	HMDB0029620	44037	LMPK12110847	C10192	5281701	520-31-0	Flavonoids	Flavones
compound00202	5.14_237.0403m/z	M+FA-H	C10H8O4	56.3	0	-0.9	Scopoletin		237.041	237.04	5.14	NEG	5689.37	5819.22	5792.84	0.00746856	0.00767335	0.00752898	0.00755696	RODXRVNMMDRFIK-UHFFFAOYSA-N	COC1=C(O)C=C2OC(=O)C=CC2=C1	HMDB0034344	6956		C01752	5280460	92-61-5	Phenylpropanoids	Coumarins
compound00203	4.94_311.1502m/z	M-H2O-H	C16H26O7	52.4	0	0.72	Schizonepetoside C		311.15	311.15	4.94	NEG	3165.2	2674.43	2818.06	0.00415503	0.00352657	0.00366264	0.00378141	WDPNMVOXTFKLMJ-MDZDMXLPSA-N	CC1CCC(=C(C)COC2C(C(C(C(O2)CO)O)O)O)C(=O)C1		71833		C17636	46173961
compound00204	9.30_415.2112m/z	M+H-H2O	C24H32O7	42.1	0	-0.7	Schisandrin		415.212	415.211	9.3	POS	23275.6	23515.4	22945.2	0.0305544	0.031008	0.029822	0.0304614	YEFOAORQXAOVJQ-OZAJXLCCSA-N	COc1cc2c(c(OC)c1OC)-c1c(cc(OC)c(OC)c1OC)C[C@](C)(O)[C@H](C)C2						7432-28-2	Phenylpropanoids	Lignans
compound00205	7.49_513.2824m/z	M+H-H2O	C30H42O8	42.9	0.00338	-4.35	Proscillaridin A	405.2207, 513.0799, 513.2823	513.285	513.282	7.49	POS	132747	135435	130792	0.17426	0.178588	0.169991	0.174279	MYEJFUXQJGHEQK-RLQJMXQZSA-N	C[C@@H]1O[C@@H](OC2C=C3CCC4C(CCC5(C)C(c6ccc(=O)oc6)CCC45O)C3(C)CC2)[C@H](O)[C@H](O)[C@H]1O						466-06-8	Steroids	Other steroids
compound00206	5.80_517.3144m/z	M+Na	C28H46O7	55.7	0	1.75	polyporoid,c		517.313	517.314	5.8	POS	18506.7	17321.3	16447.9	0.0242941	0.0228403	0.0213773	0.0228373	RVRAYMBCPTYQKZ-ZZYQDZCKSA-N	C[C@@H](C[C@H]([C@@](C)([C@H]1[C@H](C[C@@]2([C@@]1(CC[C@H]3C2=CC(=O)[C@H]4[C@@]3(C[C@@H]([C@@H](C4)O)O)C)C)O)O)O)O)C(C)C
compound00207	5.45_507.2960m/z	M+FA-H	C27H42O6	43.7	0	-0.68	Podecdysone B		507.296	507.296	5.45	NEG	4176.14	4433.16	4529.46	0.00548211	0.00584566	0.00588695	0.00573824	AEFMTBQZWMUASH-IILZZRPCSA-N	CC12CCC3=C(C1=CCC2C(C)(C(CCC(C)(C)O)O)O)CC(=O)C4C3(CC(C(C4)O)O)C		67216		C08832	441831	22612-27-7	Steroids	Other steroids
compound00208	6.40_457.0899m/z	M+K	C21H22O9	46.3	0	0.97	Pinocembrin-7-O-beta-D-glucopyranoside		457.089	457.09	6.4	POS	23371.4	22864.9	22892.2	0.0306802	0.0301502	0.0297531	0.0301945	GPGFGFUBECSNTG-UHFFFAOYSA-N	O=C1CC(c2ccccc2)Oc2cc(OC3OC(CO)C(O)C(O)C3O)cc(O)c21						75829-43-5	Flavonoids	Flavanones
compound00209	1.10_194.0784n	M-H2O-H, M-H	C7H14O6	43	8.26	-3.54	Pinitol	103.0027, 113.0235, 115.0390, 127.0389, 131.0338, 146.9605, 157.0137, 157.0494, 175.0244, 175.0603	175.061	175.06	1.1	NEG	12865.6	13027.2	13213.2	0.0168889	0.017178	0.0171733	0.0170801	DSCFFEYYQKSRSV-FEPQRWDDSA-N	[H]C1(O)[C@]([H])(O)[C@]([H])(O)C([H])(OC)[C@]([H])(O)[C@@]1([H])O	HMDB0304321	86586			164619	484-69-5	Carbohydrates and Glycosides	Carbohydrates
compound00210	5.38_475.1012m/z	M+K	C21H24O10	44	5.67	2.41	Phlorizin	243.0641, 245.0439, 269.0443, 271.0223, 287.0543, 297.0336, 349.0695, 365.1021, 391.0783, 475.1028	475.1	475.101	5.38	POS	74514	70904.2	72255.9	0.0978161	0.0934959	0.0939113	0.0950744	IOUVKUPGCMBWBT-HXBJIUPGSA-N	O=C(CCc1ccc(O)cc1)c1c(O)cc(O)cc1O[C@@H]1OC(CO)[C@@H](O)[C@@H](O)C1O						60-81-1	Flavonoids	Chalcones
compound00211	3.77_385.1139m/z	M-H2O-H	C17H24O11	45.7	0	-0.41	Phlorigidoside C		385.114	385.114	3.77	NEG	4277.33	4325.18	4842.19	0.00561495	0.00570328	0.00629342	0.00587055	VZRXACBYBGKGNQ-BZBFCOPTSA-N	COC(=O)C1=COC(O[C@@H]2OC(CO)C(O)C(O)C2O)[C@@H]2[C@H]1C(O)C1O[C@@]12C						276691-32-8	Terpenes	Monoterpenes
compound00212	5.64_147.0438m/z	M+H	C9H6O2	53.6	0	-1.82	Phenylpropiolic acid		147.044	147.044	5.64	POS	3752.77	3773.59	3792.59	0.00492634	0.00497595	0.00492924	0.00494384	XNERWVPQCYSMLC-UHFFFAOYSA-N	OC(=O)C#CC1=CC=CC=C1	HMDB0002359	6644			69475	637-44-5	Phenylpropanoids	Simple phenylpropanoids
compound00213	5.26_329.0666m/z	M-H	C17H14O7	55.6	65.7	-0.26	phenylpropanoids	135.0442, 149.0236, 179.0343, 329.0678	329.067	329.067	5.26	NEG	78107.6	81683.1	81660.7	0.102534	0.107709	0.106135	0.105459	DPMVCMFEBYVTFB-UHFFFAOYSA-N	C1=CC(=C(C=C1C=CC(=O)OCC(=O)C2=CC(=C(C=C2)O)O)O)O
compound00214	6.08_275.1615m/z	M+Na	C15H24O3	44.2	0	-1.11	Phaeocaulisin E		275.162	275.161	6.08	POS	1892.45	1985.26	2094.15	0.00248426	0.0026178	0.00272178	0.00260795	TXIKNNOOLCGADE-DHMWGJHJSA-N	CC(=C1C[C@H]2[C@@H](CC[C@]2(C)O)[C@@](CC1=O)(C)O)C						1443040-31-0	Terpenes	Sesquiterpenes
compound00215	4.52_317.0655m/z	M+	C16H13O7+	41.1	0	-2.11	Petunidin		317.066	317.065	4.52	POS	5600.16	5817.47	6138.1	0.00735145	0.00767105	0.00797772	0.00766674	AFOLOMGWVXKIQL-UHFFFAOYSA-O	C1(O)C=C2[O+]=C(C3=CC(O)=C(O)C(OC)=C3)C(O)=CC2=C(O)C=1	HMDB0003173		LMPK12010005	C08727	441774	13270-60-5	Flavonoids	Anthocyanins
compound00216	9.07_517.3173m/z	M-H	C30H46O7	40	0	0.49	Odoroside A		517.317	517.317	9.07	NEG	1102.71	1367.23	1292.57	0.00144755	0.00180285	0.00167995	0.00164345	YBZZSZQZDODUAA-FNFYTULRSA-N	CO[C@@H]1C[C@H](O[C@H]2CC[C@]3(C)[C@H]4CC[C@]5(C)[C@@H](C6=CC(=O)OC6)CC[C@]5(O)[C@@H]4CC[C@@H]3C2)O[C@H](C)[C@@H]1O						12738-19-1	Steroids	Other steroids
compound00217	12.71_409.3830m/z	M+H	C30H48	52.3	0	0.34	olean-11,13(18)-diene		409.383	409.383	12.71	POS	21927.6	22488.5	22438.9	0.0287849	0.0296539	0.0291639	0.0292009	OOVSUFZRKGCLKQ-UHFFFAOYSA-N	CC1(CCC2(CCC3(C(=C2C1)C=CC4C3(CCC5C4(CCCC5(C)C)C)C)C)C)C
compound00218	13.33_477.3339m/z	M+Na	C30H46O3	52.2	0	0	Oleanonic acid		477.334	477.334	13.33	POS	65919.5	65136.7	63924.2	0.086534	0.0858907	0.0830826	0.0851691	FMIMFCRXYXVFTA-FUAOEXFOSA-N	CC1(C)CC[C@@]2(CC[C@]3(C)C(=CC[C@@H]4[C@@]5(C)CCC(=O)C(C)(C)[C@@H]5CC[C@@]34C)[C@@H]2C1)C(O)=O	HMDB0304711						Terpenes	Triterpenes
compound00219	4.32_385.1139m/z	M-H2O-H	C17H24O11	40.9	0	-0.3	Oleoside 11-methyl ester		385.114	385.114	4.32	NEG	16263.5	17565.3	16134.4	0.0213494	0.023162	0.02097	0.0218271	XSCVKBFEPYGZSL-JYVCFIOWSA-N	CC=C1C(C(=COC1OC2C(C(C(C(O2)CO)O)O)O)C(=O)OC)CC(=O)O	HMDB0041550	95933			10692563	60539-23-3	Terpenes	Monoterpenes
compound00220	10.40_241.2159m/z	M+H	C15H28O2	42.7	0	-1.15	Omega-Pentadecalactone		241.216	241.216	10.4	POS	2417.84	2588.34	2653.16	0.00317395	0.00341304	0.00344832	0.0033451	FKUPPRZPSYCDRS-UHFFFAOYSA-N	O=C1CCCCCCCCCCCCCCO1	HMDB0034455	89945			235414	106-02-5	Others
compound00221	10.80_349.2387m/z	M+FA-H	C20H32O2	52.9	0	0.92	oriediterpenol		349.238	349.239	10.8	NEG	2474.14	2195.01	2578.85	0.00324786	0.00289439	0.00335174	0.00316466	ZALNTAHRBOFRCM-UHFFFAOYSA-N	CC1CC23CCC4C(C(CCC4(C2CC(=O)C1C3)C)O)(C)C
compound00222	5.19_271.0611m/z	M-H	C15H12O5	42.5	0	-0.32	Protosappanin A		271.061	271.061	5.19	NEG	9459.37	8401.98	9658.86	0.0124175	0.011079	0.0125537	0.0120167	MUKYVRVYBBYJSI-UHFFFAOYSA-N	OC1=CC=C2C(OCC(=O)CC3=CC(O)=C(O)C=C23)=C1	HMDB0256874						Phenols	Polyphenols
compound00223	4.79_163.0393m/z	M-H	C9H8O3	60.5	90.1	-4.72	Orthocumarsaure	119.0493, 163.0392	163.04	163.039	4.79	NEG	35923.3	37519.3	37369.3	0.0471573	0.0494738	0.0485691	0.0484001	PMOWTIHVNWZYFI-UHFFFAOYSA-N	C1=CC=C(C(=C1)C=CC(=O)O)O					637540	583-17-5
compound00224	8.92_285.0767m/z	M-H	C16H14O5	58.1	0	-0.45	Oxypeucedanin		285.077	285.077	8.92	NEG	12761.9	11571.6	11807.4	0.0167528	0.0152585	0.0153461	0.0157858	QTAGQHZOLRFCBU-UHFFFAOYSA-N	CC1(C)OC1COC1=C2C=CC(=O)OC2=CC2=C1C=CO2	HMDB0030622	67573		C09282	160544	3173-02-2	Phenylpropanoids	Coumarins
compound00225	6.73_289.0718m/z	M+FA-H	C14H12O4	44.1	0.902	0.11	p-hydroxy-5,6-dehydrokawain	159.0441, 171.0439, 187.0393, 228.9891, 243.0294, 248.9962, 261.0403, 269.0014, 288.9965, 289.0725	289.072	289.072	6.73	NEG	25652.4	25914.4	24990.2	0.0336744	0.0341713	0.0324799	0.0334418	VWYHYOYHRIWSJU-QPJJXVBHSA-N	COc1cc(/C=C/c2ccc(O)cc2)oc(=O)c1						39986-86-2	Phenols	Monophenols
compound00226	12.12_431.3138m/z	M+H	C27H42O4	47.4	0	-4.1	Pennogenin		431.316	431.314	12.12	POS	3342.86	2839.62	2785.96	0.00438824	0.00374438	0.00362093	0.00391785	SYYHBUHOUUETMI-WJOMMTHPSA-N	C1[C@H](O)CC2[C@@](C)([C@@]3([H])CC[C@]4(C)[C@@]5(O)[C@@H]([C@]6(O[C@H]5C[C@@]4([H])[C@]3([H])CC=2)CC[C@@H](C)CO6)C)C1		84198	LMST01080041		12314056		Steroids	Other steroids
compound00227	6.40_363.2179m/z	M-H	C21H32O5	56.6	0	0.49	pergularin		363.218	363.218	6.4	NEG	13913	14524.8	14215.4	0.0182639	0.0191527	0.0184758	0.0186308	VJMNSJUASLIQEP-UPFSRWTJSA-N	CC(=O)[C@@]1(CC[C@]2([C@@]1([C@@H](C[C@H]3[C@H]2CC=C4[C@@]3(CC[C@@H](C4)O)C)O)C)O)O
compound00228	11.84_511.3392m/z	M+Na	C30H48O5	45	0	-0.5	Orthosphenic acid		511.339	511.339	11.84	POS	7763.33	7627.1	7638.11	0.0101911	0.0100573	0.00992728	0.0100585	JPAXVSRGFJVPEU-XCIUXINDSA-N	C[C@@H]1[C@@]23CC[C@H]4[C@]([C@@H]2C[C@H]([C@@]1(OC3)O)O)(CC[C@@]5([C@@]4(CC[C@@]6([C@H]5C[C@](CC6)(C)C(=O)O)C)C)C)C						86632-20-4	Terpenes	Triterpenes
compound00229	12.67_300.2892m/z	M+NH4	C18H34O2	51.4	0	-1.92	octadecaenoic acid		300.29	300.289	12.67	POS	8257.8	8586.91	8041.67	0.0108402	0.0113229	0.0104518	0.0108716	LKOVPWSSZFDYPG-UHFFFAOYSA-N	CCCCCCCCCCCCCCCC=CC(O)=O	HMDB0245277				172146
compound00230	4.79_283.0612m/z	M-H2O-H	C16H14O6	53.3	50.1	-0.03	protosappanin c	283.0611	283.061	283.061	4.79	NEG	14158.5	13886.2	14359	0.0185861	0.0183107	0.0186625	0.0185198	QNHPMVBTMIUVRU-INIZCTEOSA-N	C1C2=CC(=C(C=C2C3=C(C=C(C=C3)O)OC[C@]1(C=O)O)O)O
compound00231	9.41_537.2470m/z	M-H	C31H38O8	53	0	-4.35	Saucerneol	251.2014, 323.2375, 363.2689, 367.2277, 411.2175, 469.2583, 476.2774, 479.2025, 536.2963, 537.2432	537.249	537.247	9.41	NEG	312208	313910	304550	0.409843	0.413929	0.395825	0.406532	PMOZJIPBLSZHEA-UHFFFAOYSA-N	CC1C(C(OC1C2=CC(=C(C=C2)O)OC)C3=CC(=C(C=C3)OC(C)C(C4=CC(=C(C=C4)OC)OC)O)OC)C					73199957
compound00232	6.33_209.0809m/z	M+H-H2O	C11H14O5	41.4	0	0.14	Sarracenin		209.081	209.081	6.33	POS	1736.91	1698.8	1563.95	0.00228008	0.00224007	0.00203267	0.00218427	QGBCGMGBGAHJIT-UHFFFAOYSA-N	CC1C2C3CC(O1)OC2OC=C3C(=O)OC		322275			427877		Terpenes	Monoterpenes
compound00233	5.12_303.0859m/z	M+H	C16H14O6	52.1	27.6	-1.41	sappanone b	163.0387, 205.0492, 229.0491, 303.0852	303.086	303.086	5.12	POS	156813	155292	163754	0.205852	0.204771	0.212831	0.207818	BTLMXNHNFFXBHW-MRXNPFEDSA-N	C1[C@@](C(=O)C2=C(O1)C=C(C=C2)O)(CC3=CC(=C(C=C3)O)O)O
compound00234	5.55_287.0909m/z	M+H	C16H14O5	42	5.21	-1.68	Sappanchalcone	147.0437, 189.0542, 223.1325, 251.1276, 259.0594, 269.1386, 287.055, 287.0897	287.091	287.091	5.55	POS	15954.5	16022.9	15704.9	0.0209439	0.0211281	0.0204118	0.0208279	JVGNTXGHBHMJDO-QHHAFSJGSA-N	C1(O)=CC=C(C(=O)/C=C/C2C=CC(O)=C(O)C=2)C(OC)=C1		51918	LMPK12120114		5319493		Flavonoids	Chalcones
compound00235	7.49_229.1226m/z	M+H-H2O	C15H18O3	42.8	0	1.19	Santonin		229.122	229.123	7.49	POS	1276.56	1175.06	1393.52	0.00167577	0.00154946	0.00181117	0.0016788	XJHDMGJURBVLLE-BOCCBSBMSA-N	[C@H]12OC([C@@H](C)[C@@H]1CC[C@@]1(C)C=CC(=O)C(C)=C21)=O			LMPR0103190001	C02206	221071		Terpenes	Sesquiterpenes
compound00236	6.75_555.3168m/z	2M-H	C15H22N2O3	42.4	0	-3.53	Santacruzamate A		555.319	555.317	6.75	NEG	3496.81	3270.19	3708.71	0.00459034	0.00431215	0.00482023	0.00457424	HTOYBIILVCHURC-UHFFFAOYSA-N	O=C(OCC)NCCCC(NCCC1=CC=CC=C1)=O						1477949-42-0	Alkaloids
compound00237	7.99_501.2852m/z	M-H2O-H	C30H40N4O4	53.4	0	-3.74	sanjoinine B	207.9758, 381.2071, 399.2169, 439.2487, 443.2065, 455.2824, 457.2564, 501.2436, 501.2662, 501.2745	501.287	501.285	7.99	NEG	225271	232405	232481	0.295719	0.306455	0.302157	0.301444	RZPGHGRAYXXUEA-FOCLMDBBSA-N	CC(C)CC1C(=O)N/C=C/C2=CC=C(C=C2)OC(C(C(=O)N1)NC(=O)C(CC3=CC=CC=C3)NC)C(C)C
compound00238	5.06_757.1147m/z	M+K	C36H30O16	54.4	0	-2.62	Salvianolic acid E		757.117	757.115	5.06	POS	8375.79	9284.55	10867.4	0.0109951	0.0122428	0.0141243	0.0124541	SOXUSBQFIOBYJU-UHFFFAOYSA-N	O=C(C=Cc1ccc(O)c(O)c1C(=Cc1ccc(O)c(O)c1)C(=O)OC(Cc1ccc(O)c(O)c1)C(=O)O)OC(Cc1ccc(O)c(O)c1)C(=O)O						142998-46-7	Phenylpropanoids	Simple phenylpropanoids
compound00239	5.74_494.1202n	M+H, M+Na	C26H22O10	45.9	2.48	-2.19	Salvianolic acid A	199.0385, 205.0491, 227.0334, 245.0440, 287.0544, 379.0805, 381.0959, 407.0748, 449.0861, 495.1279	495.129	495.127	5.74	POS	632279	647112	645810	0.830006	0.853296	0.839361	0.840888	YMGFTDKNIWPMGF-UCPJVGPRSA-N	C1=CC(=C(C=C1CC(C(=O)O)OC(=O)C=CC2=C(C(=C(C=C2)O)O)C=CC3=CC(=C(C=C3)O)O)O)O		68360		C10492	5281793	96574-01-5	Phenylpropanoids	Stilbenoids
compound00240	4.92_561.1029m/z	M+K	C24H26O13	41.8	0	4.59	Salviaflaside		561.1	561.103	4.92	POS	6698.95	6721.11	6674.05	0.00879386	0.0088626	0.00867429	0.00877692	DSMWJDJWYGMEBO-PRFRQLEPSA-N	C1=CC(=C(C=C1CC(C(=O)O)OC(=O)C=CC2=CC(=C(C=C2)O)OC3C(C(C(C(O3)CO)O)O)O)O)O	HMDB0033705	89485			6438919	178895-25-5	Carbohydrates and Glycosides	Glycosides
compound00241	4.12_323.1103m/z	M+Na	C14H20O7	44	18.3	0.53	Salidroside	322.1318, 323.1098	323.11	323.11	4.12	POS	80769.4	79641.4	82426.8	0.106028	0.105017	0.10713	0.106058	ILRCGYURZSFMEG-RKQHYHRCSA-N	C1=CC(=CC=C1CCOC2C(C(C(C(O2)CO)O)O)O)O		44847		C06046	159278	10338-51-9	Carbohydrates and Glycosides	Glycosides
compound00242	5.36_261.0767m/z	M-H	C14H14O5	45	0	-0.72	Rutaretin		261.077	261.077	5.36	NEG	7835.06	8634.59	8715.95	0.0102853	0.0113858	0.0113282	0.0109997	FVFQELHSZVFPDZ-VIFPVBQESA-N	CC(C)(O)[C@@H]1Cc2cc3ccc(=O)oc3c(O)c2O1						13895-92-6	Phenylpropanoids	Coumarins
compound00243	7.07_281.1394m/z	M-H	C15H22O5	57.1	47	-0.28	rugosicacid d	201.1279, 281.1393	281.139	281.139	7.07	NEG	153735	156046	155884	0.201812	0.205766	0.202602	0.203393	USJPIXZLBJXWSX-UHFFFAOYSA-N	CC(C)C1CCC2(CC3C(=CC(C2(O1)O3)O)C(=O)O)C					101607239
compound00244	5.68_265.1443m/z	M-H2O-H	C15H24O5	52.6	0	-0.76	rugosicacid c		265.144	265.144	5.68	NEG	9035.11	8651.69	8751.99	0.0118606	0.0114083	0.011375	0.011548	OOLTYBWQVKVCOH-UHFFFAOYSA-N	CC(C)C1CCC2(C1(C(C=C(C(C2)O)C(=O)O)O)O)C					101606460
compound00245	6.44_500.2407n	M+H-H2O, M+H	C28H36O8	54.2	0	-0.66	Qingyangshengenin		501.248	501.248	6.44	POS	95253.7	96635.1	97090.1	0.125042	0.127425	0.126188	0.126218	IMRGSWAJVVVYOW-KJASTTBASA-N	CC(=O)[C@]1(O)CC[C@]2(O)C3(O)CC=C4C[C@@H](O)CC[C@]4(C)[C@H]3C[C@@H](OC(=O)c3ccc(O)cc3)[C@]12C						84745-94-8	Steroids	Other steroids
compound00246	5.05_317.0303m/z	M-H	C15H10O8	41.3	0	-0.09	Quercetagetin		317.03	317.03	5.05	NEG	11554.4	11316.8	11401.2	0.0151678	0.0149226	0.0148182	0.0149695	ZVOLCUVKHLEPEV-UHFFFAOYSA-N	C1(O)=CC2OC(C3C=C(O)C(O)=CC=3)=C(O)C(=O)C=2C(O)=C1O	HMDB0126560	51395	LMPK12112983	C10122	5281680		Flavonoids	Flavonols
compound00247	8.72_403.1377m/z	M+H	C21H22O8	42.3	0	-2.52	Quercetagetin 3,5,6,7,3',4'-hexamethyl ether		403.139	403.138	8.72	POS	6671.95	7548.27	6580.6	0.00875841	0.00995332	0.00855283	0.00908819	CHXSDKWBSFDZEU-UHFFFAOYSA-N	C1(OC)=CC2OC(C3C=C(OC)C(OC)=CC=3)=C(OC)C(=O)C=2C(OC)=C1OC	HMDB0029308	51430	LMPK12113018		386331	1251-84-9	Flavonoids	Flavones
compound00248	5.99_313.0353m/z	M-H2O-H	C16H12O8	54.8	0	-0.21	Quercetagetin 3-methyl ether		313.035	313.035	5.99	NEG	11092.3	11861.7	11976.5	0.0145611	0.0156412	0.0155659	0.015256	QZAXKZRZMAXPSF-UHFFFAOYSA-N	C1(O)=CC2OC(C3C=C(O)C(O)=CC=3)=C(OC)C(=O)C=2C(O)=C1O		51396	LMPK12112984		5320475
compound00249	10.43_305.2098m/z	M+H-H2O	C19H30O4	46.2	0	-4.18	Rapanone		305.211	305.21	10.43	POS	3438.14	3448.2	3797.4	0.00451332	0.00454688	0.0049355	0.00466523	AMKNOBHCKRZHIO-UHFFFAOYSA-N	C1(O)C(=O)C(CCCCCCCCCCCCC)=C(O)C(=O)C=1		68305	LMPK15050009	C10399	100659	573-40-0	Quinones	Benzoquinones
compound00250	4.13_415.1249m/z	M-H	C18H24O11	41	0	0.86	Regaloside C		415.125	415.125	4.13	NEG	2141.4	2139.83	1969.24	0.00281107	0.00282163	0.00255943	0.00273071	DVLNCWXFKKSRQB-NSVVQGBUSA-N	O=C(/C=C/c1ccc(O)c(O)c1)OC[C@@H](O)CO[C@@H]1O[C@H](CO)[C@@H](O)[C@H](O)[C@H]1O						117591-85-2	Carbohydrates and Glycosides	Glycosides
compound00251	11.49_580.2345m/z	M-H2O-H	C35H37NO8	40.8	0	0.76	Regelidine		580.234	580.235	11.49	NEG	6865.34	5621.95	5916.04	0.00901228	0.00741323	0.0076891	0.0080382	MZSHQEJWMYSZEP-UHFFFAOYSA-N	CC1(C)OC23C(OC(=O)c4cccnc4)C1CC(OC(=O)c1ccccc1)C2(C)C(OC(=O)c1ccccc1)CCC3(C)O						114542-54-0	Alkaloids
compound00252	10.96_298.2506n	M-H2O-H, M-H	C18H34O3	56.2	49	-0.81	RICINELAIDIC ACID FREE ACID	297.1529, 297.2426	297.243	297.243	10.96	NEG	93371.2	94294.5	93064.6	0.12257	0.124339	0.120957	0.122622	WBHHMMIMDMUBKC-UHFFFAOYSA-N	CCCCCCC(O)CC=CCCCCCCCC(O)=O	HMDB0242322				8839
compound00253	4.94_301.0347m/z	M-H	C15H10O7	53.1	0	-2.3	Robinetin		301.035	301.035	4.94	NEG	16676.5	16113.1	16103.1	0.0218915	0.0212471	0.0209292	0.021356	SOEDEYVDCDYMMH-UHFFFAOYSA-N	C1(O)=CC2OC(C3C=C(O)C(O)=C(O)C=3)=C(O)C(=O)C=2C=C1		49995	LMPK12111577	C10177	5281692		Flavonoids	Flavonols
compound00254	4.90_295.1186m/z	M-H	C15H20O6	41.1	2.48	-0.4	Rosin	113.0234, 115.039, 151.076, 251.1291, 277.0714, 295.0813, 295.1175	295.119	295.119	4.9	NEG	128112	128229	127517	0.168175	0.169086	0.165734	0.167665	KHPCPRHQVVSZAH-GUNCLKARSA-N	OC[C@H]1O[C@@H](OC/C=C/c2ccccc2)[C@H](O)[C@@H](O)[C@@H]1O						85026-55-7	Phenylpropanoids	Simple phenylpropanoids
compound00255	8.15_487.3408m/z	M+H-H2O	C30H48O6	54.7	0	-2.07	roxburic acid		487.342	487.341	8.15	POS	10782.4	10504.5	10701.4	0.0141543	0.0138514	0.0139087	0.0139715	OTMKLLGULDKXFS-DSZNRGTLSA-N	C[C@@H]1CC[C@@]2(CC[C@@]3(C(=CC[C@H]4[C@]3([C@H](CC5[C@@]4(C[C@H]([C@H](C5(C)C)O)O)C)O)C)[C@H]2[C@]1(C)O)C)C(=O)O
compound00256	6.25_281.1393m/z	M-H	C15H22O5	60.2	67.2	-0.45	rugosicacid b	113.0234, 237.1498, 281.1392	281.139	281.139	6.25	NEG	42831.4	41733.3	41396.5	0.0562257	0.0550305	0.0538032	0.0550198	BJASCOCBBQIWQW-UHFFFAOYSA-N	CC(C)C1CCC2(C13C(C=C(C(C2)(O3)O)C(=O)O)O)C					101606459
compound00257	0.72_120.0420n	M+FA-H, 2M-H	C4H8O4	41.9	11.8	-2.12	Glycolaldehyde dimer	75.0077, 87.0077, 105.0183, 129.0184, 147.0291, 165.0397	239.077	239.077	0.72	NEG	64911	62010.7	67628.6	0.0852101	0.0817688	0.0878971	0.0849587	ATFVTAOSZBVGHC-UHFFFAOYSA-N	C1C(OCC(O1)O)O		65500			186078	23147-58-2	Others
compound00258	0.94_665.0288m/z	2M-H	C8H15NO9S2	52.1	0	-2.33	glucocapparin		665.03	665.029	0.94	NEG	10090.1	8469.3	9598.4	0.0132455	0.0111678	0.0124751	0.0122961	UBTOEGCOMHAXGV-CBQIKETKSA-N	CC(=NOS(=O)(=O)O)SC1C(C(C(C(O1)CO)O)O)O				C08404	5281133
compound00259	4.46_193.0497m/z	M+H-H2O	C10H10O5	44.1	0	1.01	5-Hydroxyferulic acid		193.05	193.05	4.46	POS	1037.52	1108.79	1089.06	0.00136198	0.00146208	0.00141546	0.00141317	YFXWTVLDSKSYLW-NSCUHMNNSA-N	COC1=C(O)C(O)=CC(\C=C\C(O)=O)=C1	HMDB0035484			C05619	446834	110642-42-7	Phenylpropanoids	Simple phenylpropanoids
compound00260	5.48_162.0679n	M+H-H2O, M+H	C10H10O2	47.6	32.2	-1.19	5-Hydroxy-1-tetralone	133.0282, 135.0439, 145.0645, 163.0387, 163.0744	163.075	163.075	5.48	POS	32169.6	33242.1	33511.5	0.0422298	0.0438338	0.0435551	0.0432062	YPPZCRZRQHFRBH-UHFFFAOYSA-N	C1CC2=C(C=CC=C2O)C(=O)C1		329680			119921		Phenols	Monophenols
compound00261	9.68_549.3435m/z	M-H	C31H50O8	52.6	0	0.34	5-ene-methyl-7,12-didehydroxy-cholate-3-o-β-d-glucopyranoside		549.343	549.343	9.68	NEG	4442.5	4740.79	5113.76	0.00583177	0.00625131	0.00664637	0.00624315	WAQCRPPEESZBBB-UHFFFAOYSA-N	CC(CCC(=O)OC)C1CCC2C1(CCC3C2CC=C4C3(CCC(C4)OC5C(C(C(C(O5)CO)O)O)O)C)C
compound00262	8.68_537.2482m/z	M-H	C31H38O8	57.1	0	-2.12	5-cinnamoyl-9-o-acetylphototaxicin i	61.9873, 102.9558, 129.9747, 411.2165, 411.3049, 433.1998, 469.2592, 479.2009, 491.2396, 537.2442	537.249	537.248	8.68	NEG	267612	259120	265350	0.3513	0.341682	0.344877	0.345953	BTASCTDNNBFHIV-MIRTXXOTSA-N	CC1C(=O)C[C@]2(C(C34C1(C2(C)C)[C@H]([C@@H]([C@@]3(CC[C@@H](C4=C)OC(=O)/C=C/C5=CC=CC=C5)C)OC(=O)C)O)O)O
compound00263	5.74_219.0294m/z	M-H	C11H8O5	61.1	45.7	-2.46	5-Carboxy-7-hydroxy-2-methyl-benzopyran-gamma-one	135.0441, 175.0392, 219.0293	219.03	219.029	5.74	NEG	8979.75	9328.5	10259.9	0.0117879	0.0123008	0.0133348	0.0124745	ZCNVIPLKMDPDHM-UHFFFAOYSA-N	CC1=CC(=O)C2=C(C=C(O)C=C2O1)C(O)=O	HMDB0036346	91490			5315688
compound00264	4.96_225.0400m/z	M+FA-H	C9H8O4	52	0	-2.37	5-Acetylsalicylic acid		225.041	225.04	4.96	NEG	1308.64	1110.01	1360.31	0.00171788	0.00146368	0.001768	0.00164985	NZRDKNBIPVLNHA-UHFFFAOYSA-N	CC(=O)C1=CC(=C(C=C1)O)C(=O)O		417632			83151		Phenols	Monophenols
compound00265	6.08_435.1083m/z	2M-H	C12H10O4	55.5	0	-0.65	5-(2-Hydroxyphenoxymethyl)furfural		435.108	435.108	6.08	NEG	17887.7	17129.5	18107.5	0.0234816	0.0225874	0.0235343	0.0232011	YGLWXHTXSWRORB-UHFFFAOYSA-N	C1=CC=C(C(=C1)O)OCC2=CC=C(O2)C=O					636663
compound00266	6.30_315.0858m/z	M+H	C17H14O6	40.3	0	-1.76	5,7-Dimethoxyluteolin		315.086	315.086	6.3	POS	5652.32	5627.21	5672.34	0.00741992	0.00742017	0.00737236	0.00740415	NKGJZNRUAGQIRY-UHFFFAOYSA-N	COC1=CC2=C(C(=C1)OC)C(=O)C=C(O2)C3=CC(=C(C=C3)O)O		707997			13964548		Flavonoids	Flavones
compound00267	4.79_355.0462m/z	2M-H	C9H6O4	49.7	0	0.61	5,7-Dihydroxycoumarin		355.046	355.046	4.79	NEG	16315.1	15931.3	16346.1	0.0214171	0.0210074	0.0212451	0.0212232	KIQQFVJHWNCGAU-UHFFFAOYSA-N	O=c1ccc2c(O)cc(O)cc2o1						2732-18-5	Phenylpropanoids	Coumarins
compound00268	5.34_355.0461m/z	2M-H	C9H6O4	43.5	0	0.4	5,7-Dihydroxychromone		355.046	355.046	5.34	NEG	10193.1	9222.92	9923.96	0.0133807	0.0121616	0.0128982	0.0128135	NYCXYKOXLNBYID-UHFFFAOYSA-N	OC1=CC(O)=C2C(=O)C=COC2=C1	HMDB0032950	67341		C09001	5281343	31721-94-5	Flavonoids	Isoflavones
compound00269	4.44_221.0089m/z	M-H	C10H6O6	56.1	65.1	-1.37	5,7-Dihydroxy-4-oxo-4H-chromene-2-carboxylic acid	133.0286, 159.0442, 177.0186, 177.0549, 221.0098	221.009	221.009	4.44	NEG	26195.4	26642.8	26718.8	0.0343872	0.0351318	0.0347265	0.0347485	HGXKTBKFPFARKV-UHFFFAOYSA-N	C1=C(C=C2C(=C1O)C(=O)C=C(O2)C(=O)O)O
compound00270	4.80_207.0294m/z	M-H	C10H8O5	51.3	0	-2.35	5,7,8-Trihydroxy-2-methyl-4H-1-benzopyran-4-one		207.03	207.029	4.8	NEG	4948.77	4693.78	4474.02	0.00649636	0.00618933	0.00581491	0.00616687	MBNBHJBTPBFJAD-UHFFFAOYSA-N	CC1=CC(=O)C2=C(O1)C(=C(C=C2O)O)O					5488208	56100-43-7
compound00271	5.03_671.1383m/z	M+K	C30H32O15	44.1	0	1.67	4-O-galloylalbiflorin		671.137	671.138	5.03	POS	52866.1	55578.6	55023.8	0.0693985	0.0732873	0.0715146	0.0714001	UXHIYEMICNYJGK-NJVRKBDPSA-N	CC12C[C@H]([C@@H]3CC1(C3(C(=O)O2)COC(=O)C4=CC=CC=C4)O[C@H]5[C@@H]([C@H]([C@@H]([C@H](O5)CO)O)O)O)OC(=O)C6=CC(=C(C(=C6)O)O)O						1201580-97-3	Terpenes	Monoterpenes
compound00272	4.71_383.0783m/z	2M-H	C10H8O4	41.4	0	2.82	4-Methylesculetin		383.077	383.078	4.71	NEG	3731.14	3326.97	2773.52	0.00489794	0.00438702	0.00360476	0.00429657	KVOJTUXGYQVLAJ-UHFFFAOYSA-N	CC1=CC(=O)OC2=CC(=C(C=C12)O)O		43957			5319502	529-84-0	Phenylpropanoids	Lignans
compound00273	3.77_345.1193m/z	M-H	C15H22O9	55.5	0	0.52	4-hydroxymethyl-2,6-dimethoxyphenyl-β-D-glucopyranoside		345.119	345.119	3.77	NEG	3427.15	3221.72	3467.59	0.00449889	0.00424824	0.00450683	0.00441799	RWIINOLFQCPJMH-UHFFFAOYSA-N	COC1=CC(CO)=CC(OC)=C1OC1OC(CO)C(O)C(O)C1O	HMDB0032742				13965334	64121-98-8
compound00274	0.76_147.0895n	M+H-H2O, M+H	C6H13NO3	44.4	21.7	0	4-Hydroxyisoleucine	70.0656, 84.0448, 84.0811, 130.0498, 130.0861	130.086	130.086	0.76	POS	413191	410897	408089	0.542405	0.541818	0.530395	0.538206	OSCCDBFHNMXNME-DSDZBIDZSA-N	CC(O)[C@H](C)[C@H](N)C(=O)O						55399-93-4	Amino Acids, Peptides and derivatives	Amino acids
compound00275	9.02_406.2724n	M+H, M+Na	C24H38O5	43	0	1.18	3-Oxocholic acid		429.261	429.262	9.02	POS	15985.5	15819.7	15951	0.0209845	0.0208602	0.0207315	0.0208588	OEKUSRBIIZNLHZ-DJDNIQJZSA-N	[C@@]12([H])[C@H](O)C[C@]3([H])CC(=O)CC[C@]3(C)[C@@]1([H])C[C@H](O)[C@]1(C)[C@@]([H])([C@@](C)([H])CCC(=O)O)CC[C@@]21[H]	HMDB0000502	57908	LMST04010443		5283956	2304-89-4	Steroids	Other steroids
compound00276	7.31_209.0813m/z	M+FA-H	C10H12O2	40.9	0	-3.64	3-Phenylbutyric acid		209.082	209.081	7.31	NEG	1770.31	1861.69	1871.37	0.00232392	0.00245487	0.00243222	0.00240367	ZZEWMYILWXCRHZ-UHFFFAOYSA-N	CC(CC(O)=O)C1=CC=CC=C1	HMDB0001955	6399			20724	4593-90-2	Carboxylic acid and derivatives
compound00277	4.83_299.0562m/z	2M-H	C8H6O3	54.1	0	0.14	3a,4-Dihydro-2-benzofuran-1,3-dione		299.056	299.056	4.83	NEG	2608.02	2803.83	2626.79	0.00342361	0.00369719	0.00341405	0.00351162	LCMVWZCQKTZBFZ-UHFFFAOYSA-N	C1C=CC=C2C1C(=O)OC2=O
compound00278	10.83_471.3482m/z	M-H	C30H48O4	53.5	0	0.38	3α,24-dihydroxyolean-12-en-28-oicacid		471.348	471.348	10.83	NEG	5412.34	5498.11	5392.52	0.0071049	0.00724993	0.00700868	0.00712117	PGOYMURMZNDHNS-VAASUFPOSA-N	C[C@@]12CC[C@H]([C@]([C@H]1CC[C@]3([C@H]2CC=C4[C@]3(CC[C@]5([C@@H]4CC(CC5)(C)C)C(=O)O)C)C)(C)CO)O
compound00279	10.88_469.3323m/z	M-H	C30H46O4	50.8	0	-0.1	3β,23-dihydroxy-oleana-11,13(18)-dien-28-oic acid		469.332	469.332	10.88	NEG	3125.38	2297.65	2179.71	0.00410276	0.00302974	0.00283298	0.00332182	ZMKQRHHJEZOFLT-NSYMVRHRSA-N	C[C@]12CC[C@@H]([C@@]([C@@H]1CC[C@@]3([C@@H]2C=CC4=C5CC(CC[C@@]5(CC[C@]43C)C(=O)O)(C)C)C)(C)CO)O
compound00280	6.67_219.0658m/z	2M-H	C6H6O2	57.2	74.9	-2.05	5-METHYLFURFURAL	135.0442, 219.0657	219.066	219.066	6.67	NEG	160336	163426	161095	0.210476	0.215497	0.209376	0.211783	OUDFNZMQXZILJD-UHFFFAOYSA-N	CC1=CC=C(O1)C=O	HMDB0033002	68856		C11115	12097	620-02-0
compound00281	5.49_469.1126m/z	M+Na	C22H22O10	40.4	0	4.78	4''-methyloxy-Genistin		469.11	469.113	5.49	POS	26999.9	27343.2	26173.9	0.0354433	0.0360553	0.0340183	0.0351723	DQFZFJHZGAOITN-YCDQRNBNSA-N	CO[C@@H]1[C@@H](CO)O[C@@H](Oc2cc(O)c3c(=O)c(-c4ccc(O)cc4)coc3c2)[C@H](O)[C@H]1O						950910-16-4	Flavonoids	Isoflavones
compound00282	4.95_253.1795m/z	M+H	C15H24O3	53.9	45.2	-1.37	4,10-Epizedoarondiol	225.0149, 235.0956, 235.1311, 235.1687, 235.9828, 253.0096, 253.1045, 253.1303, 253.1409, 253.1793	253.18	253.179	4.95	POS	80232.9	81022.3	81837.2	0.105323	0.106838	0.106364	0.106175	TXIKNNOOLCGADE-OSRDXIQISA-N	CC(=C1C[C@H]2[C@@H](CC[C@@]2(C)O)[C@@](CC1=O)(C)O)C						98644-24-7	Terpenes	Sesquiterpenes
compound00283	1.10_172.0368n	M+FA-H, 2M-H	C7H8O5	51.4	57.1	-2.17	4,5-dihydroxy-3-oxocyclohexene-1-carboxylic acid	133.0133, 142.0501, 149.0447, 155.0342, 172.9533, 173.0446, 199.0244, 199.0604, 199.1082, 217.0343	217.036	217.035	1.1	NEG	38199.1	39970.4	40273.5	0.0501448	0.0527059	0.0523437	0.0517314	SLWWJZMPHJJOPH-UHFFFAOYSA-N	C1C(C(C(=O)C=C1C(=O)O)O)O					439774	2922-42-1
compound00284	3.89_188.0346m/z	M-H	C10H7NO3	52.8	0	-3.65	4-Carboxycarbostyril		188.035	188.035	3.89	NEG	3036.23	3019.89	2807.9	0.00398572	0.0039821	0.00364943	0.00387242	MFSHNFBQNVGXJX-UHFFFAOYSA-N	C1=CC=C2C(=C1)C(=CC(=O)N2)C(=O)O		434921			85076
compound00285	10.61_419.2206m/z	M-H2O-H	C27H34O5	52.1	0	-5	4-episcopadulcicacid b	78.9579, 152.995, 418.9948, 419.2196	419.223	419.221	10.61	NEG	81788.6	80234	78928.4	0.107366	0.105798	0.102584	0.105249	DQBAMWXMUCSBLO-UHFFFAOYSA-N	CC12CCC3(C1)C(CC(C4C3(CCCC4(C)C(=O)O)C)OC(=O)C5=CC=CC=C5)CC2=O					10917156
compound00286	6.65_215.1284m/z	M+FA-H	C10H18O2	51.1	0	-2.9	4-hydroxy-2-isopropenyl-5-methylene-hexan-1-ol		215.129	215.128	6.65	NEG	2521.9	2460.59	2633.85	0.00331055	0.00324459	0.00342322	0.00332612	GVGCIKKRNRWACL-UHFFFAOYSA-N	CC(=C)C(CC(C(=C)C)O)CO
compound00287	5.74_439.0787m/z	M+K	C21H20O8	40.3	0	-0.65	4'-Demethylepipodophyllotoxin		439.079	439.079	5.74	POS	11998.3	11921.4	11144.7	0.0157505	0.0157199	0.0144848	0.0153184	YVCVYCSAAZQOJI-JHQYFNNDSA-N	COC1=CC(=CC(=C1O)OC)C2C3C(COC3=O)C(C4=CC5=C(C=C24)OCO5)O		43843			122797	6559-91-7	Phenylpropanoids	Lignans
compound00288	4.47_336.0848n	M-H, M+FA-H, 2M-H	C16H16O8	44.4	0	0.93	5-O-Caffeoylshikimic acid		671.162	671.162	4.47	NEG	41049.3	39899.3	38901.4	0.0538862	0.0526121	0.0505603	0.0523529	QMPHZIPNNJOWQI-GDDAOPKQSA-N	O[C@@H]1C=C(C[C@@H](OC(=O)\C=C\C2=CC(O)=C(O)C=C2)[C@@H]1O)C(O)=O	HMDB0033999	64172		C10434	5281762	73263-62-4	Phenylpropanoids	Simple phenylpropanoids
compound00289	12.90_336.2891m/z	M+NH4	C21H34O2	54.1	0	-1.79	5-Pentadec-8-enylbenzene-1,3-diol		336.29	336.289	12.9	POS	31511.2	31601.5	33853.5	0.0413655	0.0416705	0.0439996	0.0423452	TUGAUFMQYWZJAB-UHFFFAOYSA-N	CCCCCCC=CCCCCCCCC1=CC(=CC(=C1)O)O					6916254	22910-86-7
compound00290	13.34_443.3167m/z	M-H	C28H44O4	53.3	0	0.14	5α,9α-epidioxy-(22e)-ergosta-7,22-diene-3β,6β-diol		443.317	443.317	13.34	NEG	2058.31	3723.35	2817.1	0.00270199	0.00490969	0.00366139	0.00375769	LXIJTUMNXIROPP-UHFFFAOYSA-N	CC(C)C(C)C=CC(C)C1(CCC2C1(CCC3C24C=CC5(C3(CCC(C5)O)C)OO4)C)O
compound00291	9.00_293.1759m/z	M-H	C17H26O4	54.6	0	0.09	[6]-Gingerol		293.176	293.176	9	NEG	10637.3	10686.2	12773.3	0.0139638	0.0140911	0.0166015	0.0148855	NLDDIKRKFXEWBK-AWEZNQCLSA-N	CCCCCC(CC(=O)CCC1=CC(=C(C=C1)O)OC)O		45734		C10462	442793	23513-14-6	Phenols	Monophenols
compound00292	9.43_515.3003m/z	M-H	C30H44O7	41.3	0	-2.22	Adynerin		515.301	515.3	9.43	NEG	24684.1	25574.3	24650	0.0324034	0.0337229	0.0320378	0.0327214	BYZQVAOKDQTHHP-QFUJVLJYSA-N	CC1C(C(CC(O1)OC2CCC3(C(C2)CCC45C3CCC6(C4(O5)CCC6C7=CC(=O)OC7)C)C)OC)O		73553		C08845	441840	35109-93-4	Steroids	Cardiacglycosides
compound00293	6.72_623.1188m/z	2M-H	C17H12O6	42.5	0	-1.14	Aflatoxin B1		623.12	623.119	6.72	NEG	1318.8	1557.84	2016.77	0.00173121	0.00205421	0.0026212	0.00213554	OQIQSTLJSLGHID-WNWIJWBNSA-N	[H][C@]12OC=C[C@@]1([H])C1=C(O2)C=C(OC)C2=C1OC(=O)C1=C2CCC1=O	HMDB0006552	41030		C06800	186907	1162-65-8	Phenylpropanoids	Coumarins
compound00294	4.54_257.0807m/z	M+H-H2O	C15H14O5	43.5	0	-0.46	Afzelechin		257.081	257.081	4.54	POS	2363.53	2210.25	2403.86	0.00310266	0.00291449	0.00312431	0.00304715	RSYUFYQTACJFML-DZGCQCFKSA-N	C1(O)C=C2O[C@]([H])(C3C=CC(O)=CC=3)[C@@]([H])(O)CC2=C(O)C=1		47251	LMPK12020035	C09320	442154		Phenols	Polyphenols
compound00295	8.24_313.2369m/z	M+H-H2O	C18H34O5	54.5	0	-1.31	9S,12R,13R-10E-TriHOME		313.237	313.237	8.24	POS	3831.34	3553.24	3756.86	0.00502948	0.00468538	0.00488281	0.00486589	MDIUMSLCYIJBQC-WFZKJPOOSA-N	C(C)CCC[C@@H](O)[C@H](O)/C=C/[C@@H](O)CCCCCCCC(=O)O			LMFA02000341		11099581
compound00296	6.14_517.2786m/z	M+H	C29H40O8	50	0	-1.95	Ajugalactone		517.28	517.279	6.14	POS	43198.3	47406.8	44921.1	0.0567073	0.0625116	0.0583842	0.059201	LLPOMLNTBDOEOC-LYUHEGIFSA-N	C1[C@H](O)[C@H](O)C[C@@]2([H])C(=O)C=C3[C@@]([H])([C@]21C)CC(=O)[C@]1(C)[C@@]([H])([C@](O)(C)[C@]2([H])OC(=O)C(C)=C(CC)C2)CC[C@]13O		57733	LMST01040152	C08810	181744
compound00297	4.54_525.1607m/z	M+FA-H	C23H28O11	43.9	0	-1.41	Albiflorin		525.161	525.161	4.54	NEG	3463.86	3618.01	3073.66	0.00454709	0.00477079	0.00399484	0.00443757	QQUHMASGPODSIW-RPLHGOISSA-N	CC12CC(O)C3CC1(O[C@@H]1O[C@H](CO)[C@@H](O)[C@H](O)[C@H]1O)C3(COC(=O)c1ccccc1)C(=O)O2						39011-90-0	Terpenes	Monoterpenes
compound00298	4.92_237.1848m/z	M+H-H2O	C15H26O3	54.5	0	-0.45	Alismorientol B		237.185	237.185	4.92	POS	6930.46	6828.26	7080.02	0.00909776	0.0090039	0.00920193	0.0091012	CORLUEPXSCSWOJ-MYZSUADSSA-N	C[C@@]1(CCC(=C[C@@H]2[C@@H]1CC[C@@]2(C)O)C(C)(C)O)O
compound00299	9.47_469.3291m/z	M+H-H2O	C30H46O5	41.8	0	-4.45	Alisol C		469.331	469.329	9.47	POS	25725.4	25295.2	25614.6	0.0337704	0.0333548	0.0332914	0.0334722	DORJGGFFCMZTHW-KXVAGGRESA-N	CC(CC(C1C(O1)(C)C)O)C2=C3CC(C4C5(CCC(=O)C(C5CCC4(C3(CC2=O)C)C)(C)C)C)O		71706		C17461	101306923		Terpenes	Triterpenes
compound00300	4.88_391.1018m/z	M-H2O-H	C19H22O10	43.9	0	-4.07	Aloenin		391.103	391.102	4.88	NEG	4500.17	4386.6	3772.56	0.00590748	0.00578427	0.00490321	0.00553165	KFJNVVJUICKJEQ-LQDZTQBFSA-N	O=C1OC(=CC(OC)=C1)C=2C(OC3OC(CO)C(O)C(O)C3O)=CC(O)=CC2C							Carbohydrates and Glycosides	Glycosides
compound00301	10.45_255.2316m/z	M+H	C16H30O2	41.8	0	-1.09	Ambroxdiol		255.232	255.232	10.45	POS	24478.2	24542.3	25242.8	0.032133	0.032362	0.0328082	0.0324344	AIALTZSQORJYNJ-LQKXBSAESA-N	CC1(C)CCC[C@@]2(C)[C@H]1CC[C@@](C)(O)[C@@H]2CCO						38419-75-9	Phenols	Monophenols
compound00302	14.84_366.2996m/z	M+NH4	C22H36O3	57.2	35.2	-1.87	Anacardic Acid	126.1277, 166.1588, 226.1795, 266.2109, 366.2993	366.3	366.3	14.84	POS	85994.5	94366.7	77982.8	0.112887	0.124434	0.101355	0.112892	ADFWQBGTDJIESE-UHFFFAOYSA-N	C1C=C(CCCCCCCCCCCCCCC)C(C(O)=O)=C(O)C=1	HMDB0029683	45469	LMPK15040002	C10759	167551	16611-84-0	Carboxylic acid and derivatives
compound00303	2.75_203.1388m/z	M+H	C9H18N2O3	40.4	0	-1.09	Alanyleucine		203.139	203.139	2.75	POS	2188.9	2246.53	2297.82	0.00287342	0.00296232	0.00298649	0.00294074	RDIKFPRVLJLMER-BQBZGAKWSA-N	CC(C)C[C@H](NC(=O)[C@H](C)N)C(O)=O	HMDB0028691	44268			96801	3303-34-2	Amino Acids, Peptides and derivatives	Peptides
compound00304	6.41_297.0405m/z	M-H2O-H	C16H12O7	54	0	0.18	3-O-Methylquercetin		297.041	297.041	6.41	NEG	3534.03	3757.47	3599.62	0.0046392	0.00495469	0.00467845	0.00475744	WEPBGSIAWZTEJR-UHFFFAOYSA-N	C1(O)=CC2OC(C3C=C(O)C(O)=CC=3)=C(OC)C(=O)C=2C(O)=C1		51143	LMPK12112729	C04443	5280681		Flavonoids	Flavonols
compound00305	8.41_389.0666m/z	M-H	C22H14O7	60.2	12.8	-0.14	9-hydroxy-4-[(7-methoxy-2-oxochromen-8-yl)methyl]furo[3,2-g]chromen-7-one	242.0213, 243.0297, 389.0664	389.067	389.067	8.41	NEG	44352.3	41772.1	41077.2	0.0582223	0.0550816	0.0533882	0.055564	KNWSIJFQMWPQST-UHFFFAOYSA-N	COC1=C(C2=C(C=C1)C=CC(=O)O2)CC3=C4C=CC(=O)OC4=C(C5=C3C=CO5)O						265096-90-0
compound00306	8.18_327.2177m/z	M-H	C18H32O5	53.6	57.7	-0.12	9,10,11-trihydroxyoctadeca-12,15-dienoic acid	146.9378, 190.9276, 201.1126, 213.1127, 309.2075, 327.2175	327.218	327.218	8.18	NEG	93886.2	95668.9	96820.9	0.123246	0.126151	0.125838	0.125079	KFINXCASWPGHEW-UHFFFAOYSA-N	CCC=CCC=CC(C(C(CCCCCCCC(=O)O)O)O)O
compound00307	7.51_335.0561m/z	M-H	C19H12O6	56.5	13.7	0.04	6-methoxy-7-hydroxy-3,7'-bicoumarin	279.0664, 291.0656, 307.0605, 335.0562	335.056	335.056	7.51	NEG	46500.9	47229.4	46777.2	0.0610427	0.0622777	0.0607965	0.0613723	MJSCYCLFAIGQQM-UHFFFAOYSA-N	COC1=C(C=C2C(=C1)C=C(C(=O)O2)C3=CC4=C(C=C3)C=CC(=O)O4)O						2034-69-7
compound00308	5.78_301.0719m/z	M-H	C16H14O6	55.5	0	0.39	6-Methoxynaringenin		301.072	301.072	5.78	NEG	2201.44	2343.9	2292.01	0.00288988	0.00309072	0.00297893	0.00298651	FCXRFTLSXMRXTM-UHFFFAOYSA-N	C1(O)=CC2OC(C3C=CC(O)=CC=3)CC(=O)C=2C(O)=C1OC	HMDB0128583	53096	LMPK12140619		5322074
compound00309	7.20_341.0667m/z	M-H2O-H	C18H16O8	49	0	0.08	6-Methoxytricin		341.067	341.067	7.2	NEG	1185.71	1541.38	1220.5	0.00155651	0.0020325	0.00158629	0.0017251	BVRHGBHZAQNORL-UHFFFAOYSA-N	C1(O)=CC2OC(C3C=C(OC)C(O)=C(OC)C=3)=CC(=O)C=2C(O)=C1OC		49694	LMPK12111270		14034284		Flavonoids	Flavones
compound00310	5.12_271.0597m/z	M+H	C15H10O5	40.2	0	-1.47	7,3',4'-trihydroxyflavone		271.06	271.06	5.12	POS	2633.65	2584.19	2361.64	0.00345725	0.00340757	0.00306944	0.00331142	PVFGJHYLIHMCQD-UHFFFAOYSA-N	C1(O)=CC2OC(C3C=C(O)C(O)=CC=3)=CC(=O)C=2C=C1	HMDB0133311	48478	LMPK12110042		5322065		Flavonoids	Flavones
compound00311	11.22_399.3253m/z	M+H-H2O	C27H44O3	50.6	0	-1.08	9,10-Secocholesta-5,7,10-triene-3,24,25-triol	69.0704, 107.0857, 358.1497, 399.2703, 399.3249	399.326	399.325	11.22	POS	52932.7	51277.9	55084.2	0.0694859	0.0676162	0.0715931	0.0695651	FCKJYANJHNLEEP-UHFFFAOYSA-N	CC(CCC(O)C(C)(C)O)C1CCC2C(CCCC12C)=CC=C1CC(O)CCC1=C	HMDB0245662				1590
compound00312	5.54_203.0343m/z	M-H2O-H	C11H10O5	52.6	0	-3.16	7-hydroxy-6,8-dimethoxychromen-4-one		203.035	203.034	5.54	NEG	4142.65	4317.94	4507.87	0.00543815	0.00569373	0.0058589	0.00566359	ANCHXLMTFNOVDK-UHFFFAOYSA-N	COC1=C(C(=C2C(=C1)C(=O)C=CO2)OC)O
compound00313	8.64_329.2333m/z	M-H	C18H34O5	50.9	41.1	-0.26	8,11,12-trihydroxyoctadec-9-enoic acid	157.0862, 329.2335	329.233	329.233	8.64	NEG	185867	183072	187249	0.243991	0.241403	0.243368	0.242921	YFCZLXRIKFCQFU-UHFFFAOYSA-N	CCCCCCC(C(C=CC(CCCCCCC(=O)O)O)O)O					5321949
compound00314	12.07_331.2278m/z	M+FA-H	C20H30O	52.7	0	-0.39	8,11,13-Abietatriene-3beta-ol		331.228	331.228	12.07	NEG	4983.01	4432.55	4055.36	0.00654131	0.00584487	0.00527077	0.00588565	WTHUMSLQUHCWCH-CMKODMSKSA-N	CC(C)C1=CC2=C(C=C1)[C@]3(CC[C@@H](C([C@@H]3CC2)(C)C)O)C
compound00315	4.72_359.1350m/z	M-H	C16H24O9	51.4	0	0.8	8-epideoxyloganic acid		359.135	359.135	4.72	NEG	4054.27	3120.24	2972.83	0.00532213	0.00411442	0.0038638	0.00443345	DSXFHNSGLYXPNG-SPLNBZCLSA-N	C[C@@H]1CC[C@@H]2C(C(=O)O)=CO[C@@H](O[C@@H]3O[C@H](CO)[C@@H](O)[C@H](O)[C@H]3O)C21						88668-99-9	Terpenes	Monoterpenes
compound00316	3.87_357.1187m/z	M-H2O-H	C16H24O10	40.4	0	-1.01	8-Epiloganic acid		357.119	357.119	3.87	NEG	1290.83	804.246	1055.18	0.0016945	0.0010605	0.00137143	0.00137547	JNNGEAWILNVFFD-OZFVSFPVSA-N	C[C@@H]1[C@@H](O)C[C@@H]2C(C(=O)O)=CO[C@@H](O[C@@H]3O[C@H](CO)[C@@H](O)[C@H](O)[C@H]3O)[C@@H]21						82509-41-9	Terpenes	Monoterpenes
compound00317	6.41_463.0657m/z	2M-H	C12H8O5	41.1	0	-3.06	8-Hydroxybergapten		463.067	463.066	6.41	NEG	5047.68	5422.93	5412.29	0.0066262	0.0071508	0.00703438	0.00693713	MVJHUMZXIJPVHV-UHFFFAOYSA-N	COC1=C2C=CC(=O)OC2=C(O)C2=C1C=CO2	HMDB0036628	91681			3083726	1603-47-0	Phenylpropanoids	Coumarins
compound00318	10.17_295.2261m/z	M+H	C18H30O3	57	89.4	-2.24	9(S)-HOT	67.0545, 81.07, 93.0702, 95.0857, 109.1012, 151.1113, 277.2157, 295.2263	295.227	295.226	10.17	POS	45085.8	47061.6	44567.4	0.0591851	0.0620565	0.0579245	0.059722	RIGGEAZDTKMXSI-UHFFFAOYSA-N	CCC=CCC=CC=CC(O)CCCCCCCC(O)=O	HMDB0247705				53394275
compound00319	5.94_299.0559m/z	M-H2O-H	C16H14O7	51.6	9.7	-0.81	7-O-Methylluteolin-6-C-beta-glucoside qt	111.0077, 143.0492, 187.0393, 227.0708, 255.0662, 299.0554	299.056	299.056	5.94	NEG	63387.4	65813	65727.7	0.0832101	0.0867826	0.0854265	0.0851397	PHGRMBKBKPAXKQ-LLVKDONJSA-N	COC1=C(C(=C2C(=O)C[C@@H](OC2=C1)C3=CC(=C(C=C3)O)O)O)O
compound00320	3.84_167.0341m/z	M+H-H2O	C8H8O5	56.1	0	0.98	3-O-Methylgallic acid		167.034	167.034	3.84	POS	5883.44	5565.44	5741.08	0.00772332	0.00733872	0.00746171	0.00750792	KWCCUYSXAYTNKA-UHFFFAOYSA-N	COC1=CC(=CC(=C1O)O)C(=O)O				C05616	19829		Phenols	Polyphenols
compound00321	4.38_369.1176m/z	M+H	C17H20O9	45.5	0	-0.98	3-O-Caffeoylquinic acid methyl ester		369.118	369.118	4.38	POS	2443.56	2148.38	2123.96	0.00320771	0.00283291	0.00276052	0.00293371	MZNIJRAPCCELQX-AWOKGZDASA-N	COC(=O)C1(CC(C(C(C1)OC(=O)C=CC2=CC(=C(C=C2)O)O)O)O)O		985117			6476139		Phenylpropanoids	Simple phenylpropanoids
compound00322	10.35_486.2618n	M-H2O-H, M-H	C28H38O7	50.3	0	0.16	3-O-Acetylbufotalin		485.255	485.255	10.35	NEG	35408.2	33335.8	31031.9	0.0464811	0.0439573	0.0403322	0.0435902	NHHVQEFHQTULER-UHFFFAOYSA-N	CC(=O)OC1CCC2(C)C(CCC3C2CCC2(C)C(c4ccc(=O)oc4)C(OC(C)=O)CC32O)C1						4029-69-0	Steroids	Other steroids
compound00323	4.52_218.1056n	M+Na, M+K, M+H	C12H14N2O2	46.8	15.8	0.2	1-Methyl-L-tryptophan	177.0909, 177.1274, 181.0855, 195.1006, 205.1216, 223.0967, 223.1325, 240.1280, 241.0475, 241.0947	241.095	241.095	4.52	POS	200080	197498	203416	0.26265	0.260426	0.264381	0.262486	ZADWXFSZEAPBJS-JTQLQIEISA-N	CN1C=C(C2=CC=CC=C21)CC(C(=O)O)N		44695			676159	21339-55-9	Amino Acids, Peptides and derivatives	Amino acids
compound00324	12.64_280.2401n	M-H, M+FA-H	C18H32O2	50.5	0	-0.61	1-octadecadienoic acid	279.2328	279.233	279.233	12.64	NEG	433890	433256	417851	0.569577	0.571301	0.543083	0.56132	ADHNUPOJJCKWRT-UHFFFAOYSA-N	CCCCCCCCCCCCCC=CC=CC(O)=O	HMDB0255894				154212
compound00325	9.24_215.1647m/z	M+FA-H	C11H22O	53.1	0	-3.3	1-Undecen-3-ol	59.0128, 194.9865, 215.0113, 215.1282, 215.1646	215.165	215.165	9.24	NEG	62370.5	58896.5	60139.4	0.0818752	0.0776623	0.0781635	0.0792337	NAOMHUDQUVEWEF-UHFFFAOYSA-N	C=CC(O)CCCCCCCC		96991	LMFA05000513		3015762
compound00326	10.92_351.2525m/z	M+H	C21H34O4	42.5	3.91	-1.3	10-Gingerol	55.0184, 81.0702, 95.0857, 97.0649, 147.1165, 259.2044, 277.2159, 350.2685, 351.2099, 351.2503	351.253	351.252	10.92	POS	26565.4	26738.7	26421.1	0.0348729	0.0352582	0.0343397	0.0348236	AIULWNKTYPZYAN-SFHVURJKSA-N	CCCCCCCCCC(CC(=O)CCC1=CC(=C(C=C1)O)OC)O		71736		C17496	168115	23513-15-7	Phenols	Monophenols
compound00327	9.94_253.2160m/z	M+H	C16H28O2	53.8	0	-0.77	11-methoxyopposit-4(15)-en-1β-ol		253.216	253.216	9.94	POS	2791.89	2745.45	2785.58	0.00366497	0.00362022	0.00362043	0.00363521	CYQGXILAKXOOOO-UHFFFAOYSA-N	CC12CCC(C1C(=C)CCC2O)CC(C)(C)OC
compound00328	7.09_231.1379m/z	M+H-H2O	C15H20O3	51.7	0	-0.14	1-Hydroxy-5,11(13)-eudesmadien-12,8-olide		231.138	231.138	7.09	POS	2350.3	2345.49	2187.75	0.00308529	0.00309281	0.00284343	0.00300718	FRNIMDDQCZHAFA-UHFFFAOYSA-N	CC1CCC(O)C2(C)CC3OC(=O)C(=C)C3C=C12	HMDB0031970				78117269	68776-47-6
compound00329	7.43_365.0654m/z	M+H-H2O	C20H14O8	55.5	0	-0.47	12a-Hydroxypachyrrhizone	147.0437, 269.0802, 365.064	365.066	365.065	7.43	POS	275965	287432	288994	0.362266	0.379014	0.375607	0.372296	DDGYXSWHWAQNRQ-UHFFFAOYSA-N	C12OC=CC1=CC1C(=O)C3(O)C4=C(OCC3OC=1C=2OC)C=C1OCOC1=C4	HMDB0030774	48048	LMPK12060037		5318311	28768-44-7
compound00330	10.55_351.2178m/z	M+FA-H	C19H30O3	50.8	0	0.38	14,15-dinor-13-oxo-8(17)-labden-19-oic acid		351.218	351.218	10.55	NEG	5420.16	5171.62	5454.72	0.00711516	0.00681941	0.00708952	0.00700803	FYUKPQHYILWIKD-UHFFFAOYSA-N	CC(=O)CCC1C(=C)CCC2C1(CCCC2(C)C(=O)OC)C
compound00331	7.91_379.2111m/z	M+FA-H	C20H30O4	41.1	0	-4.41	14-Deoxyandrographolide		379.213	379.211	7.91	NEG	27249	26137.8	26859.1	0.0357703	0.034466	0.0349088	0.0350484	GVRNTWSGBWPJGS-YSDSKTICSA-N	CC12CCC(C(C1CCC(=C)C2CCC3=CCOC3=O)(C)CO)O		985279			11624161		Terpenes	Diterpenes
compound00332	10.59_330.2193n	M+H, M+Na	C21H30O3	51.8	0	-0.47	15-Hydroxydehydroabietic acid, methyl ester		353.209	353.209	10.59	POS	21421.4	20957.2	21750.5	0.0281203	0.0276347	0.0282692	0.028008	IGUDTNVZIOWVIV-UHFFFAOYSA-N	CC12CCCC(C1CCC3=C2C=CC(=C3)C(C)(C)O)(C)C(=O)OC
compound00333	8.86_511.2676m/z	M-H	C30H40O7	47.9	0	-4.95	16,17-Didehydroganoderic acid D		511.27	511.268	8.86	NEG	8261.99	7218.14	7258.34	0.0108457	0.009518	0.0094337	0.00993247	YBFMHFRKIFVPJA-LRGPFVJBSA-N	CC(CC(=O)C[C@@H](C)C1=CC(=O)[C@@]2(C)C3=C(C(=O)C[C@]12C)[C@@]1(C)CCC(=O)C(C)(C)[C@@H]1C[C@@H]3O)C(=O)O						1427189-02-3	Terpenes	Triterpenes
compound00334	10.85_471.3465m/z	M+H	C30H46O4	40.6	0	-0.85	16alpha-Hydroxydehydrotrametenolic acid		471.347	471.346	10.85	POS	5250.16	5454.67	4872.54	0.006892	0.00719265	0.00633286	0.00680584	XSLKAKROJKMHIT-WIUKAADNSA-N	CC(C)=CCC[C@@H](C(=O)O)[C@H]1[C@H](O)C[C@@]2(C)C3=CC[C@H]4C(C)(C)[C@@H](O)CC[C@]4(C)C3=CC[C@]12C						176390-66-2	Terpenes	Triterpenes
compound00335	9.24_317.2106m/z	M+H	C20H28O3	57	0	-1.69	18- hydroxy-7-oxo-15,16-epoxy friedolabda-5,13(16), 14- triene		317.211	317.211	9.24	POS	2282.71	2205.64	2234.33	0.00299656	0.0029084	0.00290397	0.00293631	KRLGALLDUXJJQN-UHFFFAOYSA-N	CC1C(=O)C=C2C(C1(C)CCC3=COC=C3)CCC(C2(C)C)O
compound00336	11.30_228.2320m/z	M+NH4	C14H26O	54.9	0	-1.02	13-Tetradecenal	227.1615, 227.2001, 228.1659, 228.2317	228.232	228.232	11.3	POS	20755.4	22665.1	23524.1	0.027246	0.0298867	0.0305743	0.0292357	ZVJRAGVPKPPDKE-UHFFFAOYSA-N	C=CCCCCCCCCCCCC=O					522841	85896-31-7
compound00337	6.49_447.2389m/z	M+FA-H	C24H34O5	40.7	0	0.13	19-Hydroxybufalin		447.239	447.239	6.49	NEG	4934.87	5019.65	5076.2	0.00647811	0.00661902	0.00659755	0.00656489	AXTYMYOHGWVSQN-KLAFWMLLSA-N	C[C@]12CC[C@H]3[C@@H](CC[C@@H]4C[C@@H](O)CC[C@]34CO)[C@@]1(O)CC[C@@H]2c1ccc(=O)oc1						39844-86-5	Steroids	Other steroids
compound00338	11.92_332.2940n	M+NH4, M+Na	C19H40O4	54	55.6	4.12	1-glycerin hexadecylate	89.0599, 133.0857, 151.0962, 319.2837, 333.2979, 349.2877, 350.0664, 350.2014, 350.3221, 350.3278	355.282	355.283	11.92	POS	210525	218742	200931	0.276361	0.288438	0.261151	0.275317	ATMJJPHRCNQAMW-UHFFFAOYSA-N	CCCCCCCCCCCCCCCCOC(C(CO)O)O					22599446
compound00339	6.41_533.1085m/z	M-H2O-H	C28H24O12	54.6	0	-0.84	1-carboxy-2-(3,4-dihydroxyphenyl)ethyl-(E)-3-{3-hydroxy-4-[(E)-1-methoxycarbonyl-2-(3,4-dihydroxyphenyl)-ethenoxy]}propenoate		533.109	533.109	6.41	NEG	39193.7	39713.1	38289.6	0.0514505	0.0523666	0.0497652	0.0511941	JRSJLGASDWZQGF-WBLGKDFUSA-N	COC(=O)/C(=C/C1=CC(=C(C=C1)O)O)/OC2=C(C=C(C=C2)/C=C/C(=O)O[C@@H](CC3=CC(=C(C=C3)O)O)C(=O)O)O
compound00340	5.26_233.0810m/z	M+H-H2O	C13H14O5	56.5	0	0.73	(2's)-7-hydroxy-5-hydroxymethyl-2-(2'-hydroxypropyl)chromone		233.081	233.081	5.26	POS	1588.38	1852.92	1309.55	0.0020851	0.0024433	0.00170203	0.00207681	IXBRSDJVIGCXMC-UHFFFAOYSA-N	CC(CC1=CC(=O)C2=C(O1)C=C(C=C2CO)O)O
compound00341	12.92_483.3805m/z	M+Na	C30H52O3	41.5	0	-0.84	(20S)-Protopanaxadiol		483.381	483.38	12.92	POS	110382	112524	114195	0.144901	0.148376	0.14842	0.147232	PYXFVCFISTUSOO-UHFFFAOYSA-N	CC(C)=CCCC(C)(O)C1CCC2(C)C1C(O)CC1C3(C)CCC(O)C(C)(C)C3CCC21C	HMDB0035777	91016			131751864		Terpenes	Triterpenes
compound00342	11.50_473.2911m/z	M+FA-H	C27H40O4	47.2	0	0.46	(25S)-12beta-Hydroxyspirost-4-en-3-one		473.291	473.291	11.5	NEG	39230.6	36210.8	37017.6	0.0514989	0.0477484	0.0481119	0.0491197	FTBCSMASEBPQAV-HFHIOTRISA-N	C[C@H]1CC[C@@]2(OC1)O[C@H]1C[C@H]3[C@@H]4CCC5=CC(=O)CC[C@]5(C)[C@H]4C[C@@H](O)[C@]3(C)[C@H]1[C@@H]2C						122677-90-1	Steroids	Other steroids
compound00343	5.25_285.0396m/z	M-H	C15H10O6	52.6	0	-2.84	(2E)-2-(3,4-dihydroxybenzylidene)-6,7-dihydroxy-benzofuran-3-one		285.041	285.04	5.25	NEG	22183.4	22339.4	22252	0.0291206	0.0294572	0.028921	0.0291663	PNIFOHGQPKXLJE-WUXMJOGZSA-N	C1=CC(=C(C=C1/C=C/2\C(=O)C3=C(O2)C(=C(C=C3)O)O)O)O						490-54-0
compound00344	5.77_279.1236m/z	M+FA-H	C14H18O3	52.1	37.9	-0.85	(2R,3S)- pterosin C	113.0234, 174.9966, 205.0863, 221.0797, 235.0007, 235.1339, 261.1128, 278.9895, 279.0645, 279.1236	279.124	279.124	5.77	NEG	12108.5	12921.5	11675.7	0.0158951	0.0170386	0.0151749	0.0160362	QQPCNRKHGFIVLH-ZANVPECISA-N	C[C@H]1[C@@H](C2=C(C1=O)C(=C(C(=C2)C)CCO)C)O
compound00345	0.72_164.0916m/z	M+H	C6H13NO4	49.6	46.7	-0.77	1-Deoxynojirimycin	111.0441, 114.0549, 118.0862, 128.0704, 129.0545, 132.0653, 146.0809, 147.0647, 163.1155, 164.0914	164.092	164.092	0.72	POS	322967	317868	313904	0.423966	0.419148	0.407983	0.417032	LXBIFEVIBLOUGU-JGWLITMVSA-N	C1C(C(C(C(N1)CO)O)O)O		45343		C16843	29435	73285-50-4	Carbohydrates and Glycosides	Carbohydrates
compound00346	4.36_167.0343m/z	M-H	C8H8O4	56.2	83.3	-4.27	(3S)-3-acetyl-6-methylpyran-2,4-dione	68.9945, 108.0208, 122.0599, 123.0441, 123.0804, 139.0028, 152.0106, 166.0497, 166.9952, 167.0341	167.035	167.034	4.36	NEG	7145.12	7896.82	7651.75	0.00937955	0.0104129	0.00994502	0.0099125	PGRHXDWITVMQBC-ZETCQYMHSA-N	CC1=CC(=O)[C@@H](C(=O)O1)C(=O)C						520-45-6
compound00347	10.08_279.2323m/z	2M-H	C9H16O	51.4	0	-2.39	(R)-2,6-Dimethyl-5-heptenal	279.2328	279.233	279.232	10.08	NEG	58817.7	61817.8	55056.1	0.0772112	0.0815144	0.0715566	0.0767608	YGFGZTXGYTUXBA-SECBINFHSA-N	C[C@H](CCC=C(C)C)C=O						106-72-9
compound00348	7.97_251.0922m/z	M+FA-H	C12H14O3	56	71.9	-1.37	(z)-6,7-epoxy-6,7-dihydroligustilide	179.1071, 182.9875, 207.1020, 210.9808, 210.9994, 223.0971, 231.0063, 250.1447, 250.9911, 251.0923	251.093	251.092	7.97	NEG	12868.5	13216	13793.9	0.0168927	0.0174269	0.017928	0.0174159	ZCTBULGQERTBEG-UHFFFAOYSA-N	CCCC=C1C2=C(C3C(O3)CC2)C(=O)O1					5317139
compound00349	9.57_311.2229m/z	2M-H	C9H16O2	53.4	0	0.23	(Z)-isobutyl 2-methylbut-2-enoate	171.1033, 293.2119, 311.2243	311.223	311.223	9.57	NEG	148845	151597	168599	0.195392	0.199899	0.219128	0.204807	XDEGQMQKHFPBEW-UHFFFAOYSA-N	CC=C(C)C(=O)OCC(C)C					5367806	61692-84-0
compound00350	9.88_263.1652m/z	M+FA-H	C15H22O	50.4	0	-0.4	1,1,7,7a-tetramethyl-1a,2,4,6,7,7b-hexahydrocyclopropa[a]naphthalen-5-one	263.1649	263.165	263.165	9.88	NEG	16253.4	18858.6	18448.5	0.0213362	0.0248673	0.0239776	0.0233937	NYVDTZCCCWPPPG-UHFFFAOYSA-N	CC1CC(=O)CC2=CCC3C(C12C)C3(C)C
compound00351	0.75_177.0396m/z	M-H	C6H10O6	44.9	31	-4.69	1,4-D-Gulonolactone	87.0077, 99.0077, 100.0393, 105.0183, 129.0184, 158.0450, 158.9246, 176.0556, 176.9352, 177.0397	177.041	177.04	0.75	NEG	61466.5	64809.3	64897.4	0.0806884	0.085459	0.0843474	0.0834983	SXZYCXMUPBBULW-LECHCGJUSA-N	C(C(C1C(C(C(=O)O1)O)O)O)O		3314		C01040	165105	3327-64-8	Carbohydrates and Glycosides	Carbohydrates
compound00352	5.68_199.0969m/z	M-H	C10H16O4	68.5	93.1	-3.62	(3S,3aR,5S,6S,7aR)-5,6-dihydroxy-3,6-dimethyl-3,3a,4,5,7,7a-hexahydrobenzofuran-2-one	137.0962, 155.1069, 199.0968	199.098	199.097	5.68	NEG	189785	191166	191763	0.249134	0.252076	0.249235	0.250148	WMRLNPAAXAUOIO-PLAGJLMLSA-N	C[C@H]1[C@H]2C[C@@H]([C@@](C[C@H]2OC1=O)(C)O)O
compound00353	5.42_493.2445m/z	M-H2O-H	C26H40O10	50.5	0	0.45	andrographolide-19-β-D-glucoside		493.244	493.245	5.42	NEG	3794.52	3581.22	3199.52	0.00498114	0.00472228	0.00415843	0.00462062	MFYHLELTZIBMMB-SYEQNWCSSA-N	C[C@]12CC[C@H](C[C@H]1[C@](CC(=C)[C@H]2C/C=C\3/[C@H](COC3=O)O)(C)CO[C@H]4[C@@H]([C@H]([C@@H]([C@H](O4)CO)O)O)O)O
compound00354	5.56_181.0499m/z	M-H	C9H10O4	53.2	10.4	-4.21	2',5'-dihydroxy-4'-methoxyacetophenone	59.0128, 71.0128, 89.0234, 101.0234, 109.0285, 112.9846, 152.0107, 153.0185, 180.9889, 181.0499	181.051	181.05	5.56	NEG	19533.7	20201.3	20929.4	0.0256424	0.0266379	0.0272021	0.0264941	TXBDGLVJCSOBLF-UHFFFAOYSA-N	O=C(C=1C=C(O)C(OC)=CC1O)C							Others
compound00355	5.11_633.1225m/z	M+K	C27H30O15	50.1	0	1.54	3'-Methoxyapiin		633.122	633.122	5.11	POS	14252	12818.9	13965.6	0.0187089	0.0169033	0.0181512	0.0179211	GYQQQCVFOLKXGH-LDSFXQROSA-N	C1(O[C@H]2[C@H](O[C@H]3[C@H](O)[C@](CO3)(CO)O)[C@@H](O)[C@H](O)[C@@H](CO)O2)=CC2OC(C3C=C(OC)C(O)=CC=3)=CC(=O)C=2C(O)=C1	HMDB0302257		LMPK12110774		101429690		Flavonoids	Flavones
compound00356	10.60_227.1649m/z	M+FA-H	C12H22O	56.6	0	-2.2	3,3-Diethyl-4,5-dimethyl-4-hexen-2-one		227.165	227.165	10.6	NEG	1151.22	1107.37	978.997	0.00151123	0.0014602	0.00127241	0.00141461	DDDLGRSAXDMACD-UHFFFAOYSA-N	CCC(CC)(C(=C(C)C)C)C(=O)C					549557
compound00357	5.82_191.0701m/z	M+H-H2O	C11H12O4	41	0	-1.05	3,4-Dimethoxycinnamic acid		191.07	191.07	5.82	POS	2840.26	2447.64	2703.44	0.00372847	0.00322752	0.00351367	0.00348988	HJBWJAPEBGSQPR-GQCTYLIASA-N	COC1=C(OC)C=C(\C=C\C(O)=O)C=C1	HMDB0034315	43817			717531	14737-89-4	Phenylpropanoids	Simple phenylpropanoids
compound00358	4.31_135.0442m/z	M+H-H2O	C8H8O3	44.2	0	0.88	3',4'-Dihydroxyacetophenone		135.044	135.044	4.31	POS	5270.29	5497.34	5547.37	0.00691842	0.00724892	0.00720995	0.00712576	UCQUAMAQHHEXGD-UHFFFAOYSA-N	CC(=O)C1=CC(O)=C(O)C=C1	HMDB0029661	68484		C10675	14530	1197-09-7	Phenols	Polyphenols
compound00359	6.27_191.1040m/z	M+Na	C10H16O2	54	0	-1.46	3,7-Dimethylocta-2,6-dienoate		191.104	191.104	6.27	POS	5752.55	6065.4	5718.09	0.0075515	0.00799797	0.00743183	0.00766043	ZHYZQXUYZJNEHD-UHFFFAOYSA-N	CC(C)=CCCC(C)=CC(O)=O	HMDB0036103			C16461	5275520	459-80-3
compound00360	5.34_269.0817m/z	M-H2O-H	C16H16O5	53.3	58.7	-0.68	3-(4-hydroxybenzyl)-3,4,7-chromantriol	109.0284, 147.0443, 159.0443, 269.0814	269.082	269.082	5.34	NEG	54996.2	56486.1	56421.2	0.0721947	0.0744839	0.0733309	0.0733365	IYAYKNOVHBOSPH-UHFFFAOYSA-N	C1C(C(C2=C(O1)C=C(C=C2)O)O)(CC3=CC=C(C=C3)O)O					13846660
compound00361	6.37_317.0664m/z	M-H	C16H14O7	51.4	0	-0.88	3-epi-Padmatin		317.067	317.066	6.37	NEG	1865.65	1845.42	1911.38	0.00244909	0.00243341	0.00248423	0.00245557	MRPJBTFHICBFNE-UHFFFAOYSA-N	COC1=CC(=C2C(=O)C(O)C(OC2=C1)C3=CC=C(O)C(=C3)O)O						140694-62-8	Flavonoids	Flavanonols
compound00362	6.76_301.0717m/z	M+FA-H	C15H12O4	54.9	0	-0.37	3-hydroxydehydroiso-alpha-lapachone		301.072	301.072	6.76	NEG	2215.1	2128.96	2188.99	0.00290781	0.0028073	0.00284504	0.00285339	XLBAEJKIEVPOMT-UHFFFAOYSA-N	CC(=C)C1C(C2=C(O1)C(=O)C3=CC=CC=C3C2=O)O
compound00363	4.91_375.1085m/z	2M-H	C10H8N2O2	43.7	0	-3.61	3-Methylquinoxaline-2-Carboxylic Acid		375.11	375.108	4.91	NEG	8343.57	7968.73	8561.16	0.0109528	0.0105078	0.011127	0.0108625	BJPNADFNSANIPF-UHFFFAOYSA-N	Cc1nc2ccccc2nc1C(=O)O						74003-63-7	Carboxylic acid and derivatives
compound00364	4.32_239.0195m/z	M+FA-H	C9H6O5	55.4	51.7	-1.25	3,5,7-trihydroxychromone	102.9558, 121.0285, 151.0392, 179.0343, 195.0293, 239.0191	239.02	239.019	4.32	NEG	35314.8	38180.6	37768.4	0.0463585	0.0503458	0.0490878	0.0485973	OZNMEZAXFKUCPN-UHFFFAOYSA-N	C1=C(C=C2C(=C1O)C(=O)C(=CO2)O)O					46886154
compound00365	9.74_517.3170m/z	M+FA-H	C29H44O5	52.8	0.00245	-0.19	2α,3α,19α-trihydroxy-24-norurs-4(23),12-dien-28-oicacid	253.2169, 301.1805, 397.2741, 415.2865, 437.3049, 450.2639, 455.3173, 459.2755, 473.3322, 517.3184	517.317	517.317	9.74	NEG	362528	406342	428936	0.475898	0.535812	0.55749	0.523067	XOUYZDRPADCJBZ-UHFFFAOYSA-N	CC1(CCC2(C(C1)C3=CCC4C(C3(CC2O)C)(CCC5C4(CC(C(C5=C)O)O)C)C)C(=O)O)C
compound00366	4.57_183.0293m/z	M+FA-H	C7H6O3	43.9	18.5	-4.41	2,5-Dihydroxybenzaldehyde	68.9947, 95.0492, 112.9846, 139.0392, 139.0749, 183.0043, 183.029	183.03	183.029	4.57	NEG	5447.94	5700.26	5502.3	0.00715162	0.00751649	0.00715136	0.00727316	CLFRCXCBWIQVRN-UHFFFAOYSA-N	OC1=CC(C=O)=C(O)C=C1	HMDB0004062	44699		C05585	70949	1194-98-5	Others
compound00367	9.45_239.1286m/z	M+FA-H	C12H18O2	57.1	77.9	-1.59	2-[(1R)-4-methyl-1-cyclohex-3-enyl]prop-2-enyl acetate	102.9559, 154.0628, 195.1383, 218.9871, 238.9925, 239.0348, 239.1272	239.129	239.129	9.45	NEG	12116.3	11567.7	12437	0.0159053	0.0152534	0.0161645	0.0157744	BCTDJPZNMXPMIA-LBPRGKRZSA-N	CC1=CC[C@@H](CC1)C(=C)COC(=O)C						15111-97-4
compound00368	13.16_299.2591m/z	M+FA-H	C17H34O	61.6	69.2	-0.42	2-HEPTADECANONE	253.2536, 298.9921, 299.2591	299.259	299.259	13.16	NEG	77242.6	77660	82271.3	0.101398	0.102404	0.106928	0.103577	TVTCXPXLRKTHAU-UHFFFAOYSA-N	CC(=O)CCCCCCCCCCCCCCC	HMDB0031040	87368	LMFA12000046		18027	2922-51-2
compound00369	4.46_205.0138m/z	M-H2O-H	C10H8O6	51.2	56.1	-1.94	2-Hydroxy-5-(1-carboxyvinyloxy)benzoic acid	133.0285, 161.0237, 205.0136	205.014	205.014	4.46	NEG	34556.2	36440.3	36453.4	0.0453627	0.048051	0.0473787	0.0469308	BEGACNVZFBQZRM-UHFFFAOYSA-N	C=C(C(=O)O)OC1=CC(=C(C=C1)O)C(=O)O
compound00370	7.23_451.2340m/z	M-H	C24H36O8	52	0	0.68	2alpha,5alpha,9alpha-trihydroxy-10beta,13alpha-diacetoxy-4beta,20-epoxytaxa-11-ene		451.234	451.234	7.23	NEG	1714.26	1604.58	1592.2	0.00225034	0.00211584	0.00206939	0.00214519	AUQZHMAOZHESTB-UHFFFAOYSA-N	CC1=C2C(C(C3(CCC(C4(C3C(C(C2(C)C)CC1OC(=O)C)O)CO4)O)C)O)OC(=O)C
compound00371	5.75_505.3175m/z	M+H-H2O	C29H46O8	45.6	0	2.94	2-O-Acetyl-20-hydroxyecdysone		505.316	505.317	5.75	POS	6060.63	5628.88	6087.62	0.00795593	0.00742237	0.0079121	0.00776347	TXLUXHSVMYTTCI-FORVDKSSSA-N	CC(=O)O[C@H]1C[C@@]2(C)[C@@H](C[C@H]1O)C(=O)C=C1[C@@H]2CC[C@]2(C)[C@@H]([C@@](C)(O)[C@H](O)CCC(C)(C)O)CC[C@@]12O						19536-25-5	Steroids	Other steroids
compound00372	8.29_501.2503m/z	M+FA-H	C27H36O6	47.6	0.467	1.95	20(21)-Dehydrolucidenic acid A	123.0444, 125.0598, 313.1803, 439.251, 440.2561, 443.2058, 455.2819, 501.2428, 501.2756	501.249	501.25	8.29	NEG	139247	140403	139788	0.182793	0.185139	0.181683	0.183205	APMICFQMLNFXRZ-UHFFFAOYSA-N	C=C(CCC(=O)O)C1CC(=O)C2(C)C3=C(C(=O)CC12C)C1(C)CCC(=O)C(C)(C)C1CC3O						852936-69-7	Terpenes	Triterpenes
compound00373	11.39_645.4331m/z	M+Na	C36H62O8	41.7	0	-0.95	20(R)-Ginsenoside Rh2		645.434	645.433	11.39	POS	24414.5	21841.7	29653.4	0.0320495	0.028801	0.0385406	0.0331304	CKUVNOCSBYYHIS-SUEBGMEDSA-N	CC(C)=CCC[C@@](C)(O)[C@H]1CC[C@]2(C)[C@@H]1[C@H](O)C[C@@H]1[C@@]3(C)CC[C@H](O[C@@H]4O[C@H](CO)[C@@H](O)[C@H](O)[C@H]4O)C(C)(C)[C@@H]3CC[C@]12C						112246-15-8	Terpenes	Triterpenes
compound00374	13.18_383.3166m/z	M+FA-H	C22H42O2	50.8	0	-0.2	22-Docosanolide		383.317	383.317	13.18	NEG	5947.33	5879.46	6062.67	0.00780719	0.00775279	0.00787968	0.00781322	JVNNUYHKIWNNOR-UHFFFAOYSA-N	C1(OCCCCCCCCCCCCCCCCCCCCC1)=O		97412	LMFA07040059		22715389
compound00375	4.05_353.0631m/z	M+K	C14H18O8	43	0.00663	-0.66	Glucovanillin	353.0617	353.063	353.063	4.05	POS	122067	120874	123407	0.16024	0.159387	0.160392	0.160006	LPRNQMUKVDHCFX-RKQHYHRCSA-N	COC1=C(C=CC(=C1)C=O)OC2C(C(C(C(O2)CO)O)O)O		73372		C19808	6452133	494-08-6	Carbohydrates and Glycosides	Glycosides
compound00376	6.27_395.2065m/z	M+FA-H	C20H30O5	42.9	0	-3.06	Andropanolide		395.208	395.207	6.27	NEG	3189.33	3080.05	3439.44	0.0041867	0.00406143	0.00447025	0.00423946	BOJKULTULYSRAS-QPSYGYIJSA-N	C=C1CC[C@H]2[C@@](C)(CC[C@@H](O)[C@@]2(C)CO)[C@@H]1C/C=C1\C(=O)OC[C@H]1O						869807-57-8	Terpenes	Diterpenes
compound00377	9.20_341.1357m/z	M+Na	C18H22O5	50.6	0	-0.77	Erianin		341.136	341.136	9.2	POS	4933.63	4912.93	5005.52	0.00647648	0.00647831	0.0065057	0.00648683	UXDFUVFNIAJEGM-UHFFFAOYSA-N	COC1=CC=C(CCC2=CC(OC)=C(OC)C(OC)=C2)C=C1O	HMDB0251918						Phenylpropanoids	Stilbenoids
compound00378	14.56_451.3182m/z	M+Na	C28H44O3	41.1	0	-0.24	Ergosterol peroxide		451.318	451.318	14.56	POS	3812.72	1976.29	2975.71	0.00500505	0.00260599	0.00386754	0.00382619	VXOZCESVZIRHCJ-UHFFFAOYSA-N	CC(C)C(C)C=CC(C)C1CCC2C1(C)CCC1C23C=CC2(CC(O)CCC12C)OO3						2061-64-5	Steroids	Other steroids
compound00379	5.75_591.1146m/z	M-H2O-H	C30H26O14	51.3	0	0.23	ergoflavine		591.114	591.115	5.75	NEG	1207.99	3643.03	3651.05	0.00158575	0.00480378	0.00474529	0.0037116	RAVDMGKYJQVXDU-UHFFFAOYSA-N	CC1CC2C3(C(=O)C4=C(C=CC(=C4O)C5=C(C6=C(C=C5)OC78C(C(CC(C7(C6=O)O)OC8=O)C)O)O)OC3(C1O)C(=O)O2)O
compound00380	6.27_263.1287m/z	M-H	C15H20O4	45	0	-0.6	Epoxymicheliolide		263.129	263.129	6.27	NEG	1607.94	1827.81	2040.6	0.00211077	0.00241019	0.00265218	0.00239105	IFWNFKWDSMXFLK-NCWRXGJMSA-N	C=C1C(=O)O[C@H]2[C@H]1CC[C@]1(C)O[C@@]13CC[C@@](C)(O)[C@H]23						1343403-10-0	Terpenes	Monoterpenes
compound00381	7.37_349.2019m/z	M-H	C20H30O5	46.3	0	-0.36	Epoxylathyrol		349.202	349.202	7.37	NEG	2561.11	2755.46	3029.5	0.00336203	0.00363341	0.00393745	0.0036443	VEFQDSXSELSHMX-UHFFFAOYSA-N	CC1=CC2C(CCC3(CO3)C(O)C3C(O)C(C)CC3(O)C1=O)C2(C)C						28649-60-7	Terpenes	Diterpenes
compound00382	5.01_353.1571m/z	M+Na	C16H26O7	53.2	0	-0.05	Epijasminoside A		353.157	353.157	5.01	POS	125644	125311	126437	0.164935	0.165238	0.164331	0.164834	FOONTNRMWNJWCL-UHFFFAOYSA-N	CC1=CC(=O)CC(C)(C)C1COC1OC(CO)C(O)C(O)C1O	HMDB0033111	89002			76551288	189148-81-0
compound00383	4.66_425.0865m/z	M+H-H2O	C22H18O10	40.7	1.33	-0.49	Epicatechin gallate	147.0437, 163.0385, 175.0386, 203.0337, 333.0962, 379.0805, 407.0749, 425.0826	425.087	425.087	4.66	POS	112621	114177	115132	0.14784	0.150556	0.149638	0.149345	LSHVYAFMTMFKBA-TZIWHRDSSA-N	C1(O)C=C2O[C@H](C3C=C(O)C(O)=CC=3)[C@H](OC(C3C=C(O)C(O)=C(O)C=3)=O)CC2=C(O)C=1	HMDB0037944	43599	LMPK12020090		107905	1257-08-5	Flavonoids	Flavanols
compound00384	4.79_300.9988m/z	M-H	C14H6O8	41.8	0	-0.54	Ellagic acid		300.999	300.999	4.79	NEG	3220.27	2713.49	3152.65	0.00422731	0.00357808	0.00409751	0.00396763	AFSDNFLWKVMVRB-UHFFFAOYSA-N	OC1=C(O)C2=C3C(=C1)C(=O)OC1=C3C(=CC(O)=C1O)C(=O)O2	HMDB0002899	3430		C10788	5281855	476-66-4	Phenols	Polyphenols
compound00385	10.63_278.2242n	M+H, M+NH4	C18H30O2	50.7	42.7	-1.29	Eleostearic acid	57.0705, 81.0702, 95.0495, 95.0858, 149.0231, 221.1891, 279.2313	279.232	279.231	10.63	POS	309592	315542	316663	0.406409	0.416081	0.411569	0.411353	CUXYLFPMQMFGPL-UHFFFAOYSA-N	CCCCC=CC=CC=CCCCCCCCC(O)=O	HMDB0248208				93077
compound00386	4.22_323.0746m/z	M+H	C15H14O8	50.1	0	-4.87	dulcisflavan		323.076	323.075	4.22	POS	7304.43	7276.02	6950.12	0.00958869	0.00959433	0.0090331	0.00940537	PONGJRZSHJPTOF-YMTOWFKASA-N	O[C@@H]1CC2=C(O)C(O)=C(O)C(O)=C2O[C@@H]1C1=CC(O)=C(O)C=C1	HMDB0304616				11500740
compound00387	4.65_305.0654m/z	M+K	C11H14N4O4	42.8	0	2.75	Doxofylline		305.065	305.065	4.65	POS	4101.65	3927.66	4225.05	0.00538432	0.0051791	0.00549132	0.00535158	HWXIGFIVGWUZAO-UHFFFAOYSA-N	CN1C2=C(N(CC3OCCO3)C=N2)C(=O)N(C)C1=O	HMDB0251602						Alkaloids
compound00388	0.76_118.0864m/z	M+H	C5H11NO2	51.8	59.9	1.39	DL-Valine	58.0657, 59.0497, 60.0813, 72.0812, 118.0862	118.086	118.086	0.76	POS	120745	123846	123646	0.158504	0.163306	0.160704	0.160838	KZSNJWFQEVHDMF-UHFFFAOYSA-N	C(C(N)C(C)C)(=O)O	HMDB0250806	74879	LMFA01100046	C16436	1182
compound00389	9.85_277.1444m/z	M-H	C16H22O4	54.3	0	-0.44	Ditertbutyl phthalate		277.144	277.144	9.85	NEG	1469.2	2680.5	2847.18	0.00192865	0.00353457	0.00370049	0.00305457	RYCNBIYTZSGSPI-UHFFFAOYSA-N	CC(C)(C)OC(=O)C1=CC=CC=C1C(=O)OC(C)(C)C
compound00390	7.13_259.0600m/z	M+H	C14H10O5	54.1	0	-0.32	Disalyl		259.06	259.06	7.13	POS	1471.56	1283.72	1486.17	0.00193174	0.00169274	0.00193158	0.00185202	WVYADZUPLLSGPU-UHFFFAOYSA-N	OC(=O)C1=CC=CC=C1OC(=O)C1=CC=CC=C1O	HMDB0015471	43330			5161	552-94-3
compound00391	9.99_170.0963m/z	M+H	C12H11N	40.3	0	-0.87	Diphenylamine		170.096	170.096	9.99	POS	3038.52	2990.07	3180.05	0.00398873	0.00394278	0.00413313	0.00402155	DMBHHRLKUKUOEG-UHFFFAOYSA-N	N(C1=CC=CC=C1)C1=CC=CC=C1	HMDB0032562	68774		C11016	11487	122-39-4	Others
compound00392	11.47_299.2015m/z	M-H	C20H28O2	46	19	-0.66	Dehydroabietic acid	299.2012	299.202	299.202	11.47	NEG	17916	20618.5	20255.2	0.0235187	0.027188	0.0263258	0.0256775	NFWKVWVWBFBAOV-UHFFFAOYSA-N	CC(C)C1=CC=C2C(CCC3C(C)(CCCC23C)C(O)=O)=C1	HMDB0260088						Terpenes	Diterpenes
compound00393	12.52_315.2315m/z	M+H	C21H30O2	50.3	0	-1.13	Dehydroabietic acid methyl ester	69.0703, 149.1322, 191.1064, 315.2312	315.232	315.231	12.52	POS	395617	394035	410752	0.519335	0.519584	0.533856	0.524258	PGZCJOPTDHWYES-UHFFFAOYSA-N	CC(C)C1=CC2=C(C=C1)C3(CCCC(C3CC2)(C)C(=O)OC)C					92215325
compound00394	7.75_265.1444m/z	M+FA-H	C14H20O2	54.3	63.6	-0.54	Di-t-butyl benzoquinone	61.9873, 83.0493, 112.9846, 129.9747, 216.9887, 221.1544, 244.9837, 264.9883, 265.1443	265.145	265.144	7.75	NEG	31432.3	32134.9	33747.2	0.0412619	0.0423738	0.0438614	0.042499	RDQSIADLBQFVMY-UHFFFAOYSA-N	CC(C)(C)C1=CC(=O)C=C(C1=O)C(C)(C)C	HMDB0013817	85272			12867	719-22-2
compound00395	13.18_313.2386m/z	M-H	C18H34O4	41.4	0	0.61	Dibutyl sebacate		313.238	313.239	13.18	NEG	2163.5	2180	2335.01	0.00284007	0.0028746	0.00303482	0.0029165	PYGXAGIECVVIOZ-UHFFFAOYSA-N	CCCCOC(=O)CCCCCCCCC(=O)OCCCC	HMDB0041220	95639			7986	109-43-3	Others
compound00396	5.12_289.0703m/z	M+H	C15H12O6	40.5	0	-1.14	Eriodictyol		289.071	289.07	5.12	POS	6678.95	6835.31	6870.58	0.0087676	0.0090132	0.00892972	0.00890351	SBHXYTNGIZCORC-ZDUSSCGKSA-N	C1(O)C=C2O[C@H](C3=CC=C(O)C(O)=C3)CC(=O)C2=C(O)C=1	HMDB0005810	3415	LMPK12140002	C05631	440735	552-58-9	Flavonoids	Flavanones
compound00397	5.51_269.0456m/z	M-H2O-H	C15H12O6	47.1	0	0.07	Dihydrokaempferol		269.046	269.046	5.51	NEG	3362.19	2855.65	2957.36	0.00441363	0.00376553	0.00384369	0.00400762	PADQINQHPQKXNL-LSDHHAIUSA-N	C1(O)C=C(O)C2C(=O)[C@@H]([C@@H](C3=CC=C(O)C=C3)OC=2C=1)O	HMDB0030847	3416	LMPK12140720	C00974	122850	480-20-6	Flavonoids	Flavanones
compound00398	5.13_303.0507m/z	M-H	C15H12O7	45.5	0	-1.23	Dihydromorin		303.051	303.051	5.13	NEG	2412.01	2813.95	2435.03	0.0031663	0.00371054	0.00316482	0.00334722	QIWOFDHUQPJCJF-LSDHHAIUSA-N	O=C1c2c(O)cc(O)cc2O[C@H](c2ccc(O)cc2O)[C@H]1O						18422-83-8	Flavonoids	Flavanonols
compound00399	4.61_319.0458m/z	M-H	C15H12O8	42.1	0	-0.42	Dihydromyricetin		319.046	319.046	4.61	NEG	2418.29	2619.19	2367.46	0.00317454	0.00345373	0.003077	0.00323509	KJXSIXMJHKAJOD-LSDHHAIUSA-N	C1(O)C=C2O[C@H](C3=CC(O)=C(O)C(O)=C3)[C@@H](O)C(=O)C2=C(O)C=1		3450	LMPK12113405	C02906	161557	27200-12-0	Flavonoids	Flavanonols
compound00400	4.86_423.2026m/z	2M-H	C11H16O4	49.5	0	0.49	Dihydrosinapyl alcohol		423.202	423.203	4.86	NEG	3585.2	4312.07	2985.96	0.00470637	0.00568599	0.00388086	0.00475774	PHOPGVYKZWPIGA-UHFFFAOYSA-N	COC1=CC(=CC(=C1O)OC)CCCO		347257			529893		Phenylpropanoids	Simple phenylpropanoids
compound00401	7.07_227.1285m/z	M-H	C12H20O4	50.3	0	-1.81	Dimethyl camphorate		227.129	227.129	7.07	NEG	3871.84	3790.02	3841.23	0.00508265	0.00499761	0.00499246	0.00502424	JTQKJWYDOXYYBH-UHFFFAOYSA-N	CC1(C(CCC1(C)C(=O)OC)C(=O)OC)C					348846
compound00402	14.39_429.2398m/z	M+K	C24H38O4	55.2	0	-0.95	Dioctyl phthalate		429.24	429.24	14.39	POS	21146.2	18264.6	31137.2	0.0277591	0.0240841	0.0404691	0.0307708	MQIUGAXCHLFZKX-UHFFFAOYSA-N	CCCCCCCCOC(=O)C1=CC=CC=C1C(=O)OCCCCCCCC	HMDB0251427	69894		C14227	8346	117-84-0
compound00403	9.80_149.1325m/z	M+H-H2O	C11H18O	44.9	0	0.05	Dihydrojasmone		149.132	149.132	9.8	POS	967.843	1019.69	1073.72	0.00127051	0.00134458	0.00139551	0.00133687	YCIXWYOBMVNGTB-UHFFFAOYSA-N	CCCCCC1=C(C)CCC1=O	HMDB0031565	87770			62378	1128-08-1	Others
compound00404	1.10_221.0299m/z	M+FA-H	C6H8O6	42.7	0	-2.11	Erythorbic acid		221.03	221.03	1.1	NEG	2682.88	2598.39	2885.84	0.00352188	0.0034263	0.00375073	0.0035663	CIWBSHSKHKDKBQ-DUZGATOHSA-N	C(C(C1C(=C(C(=O)O1)O)O)O)O				C20364	54675810		Carbohydrates and Glycosides	Carbohydrates
compound00405	9.60_282.2787m/z	M+H-H2O	C18H37NO2	45	0	-1.37	erythro-Sphingosine		282.279	282.279	9.6	POS	19854.6	19480.1	19891.1	0.0260636	0.0256869	0.0258526	0.0258677	WWUZIQQURGPMPG-KRWOKUGFSA-N	OC[C@]([H])(N)[C@]([H])(O)/C=C/CCCCCCCCCCCCC	HMDB0000252		LMSP01010001	C00319	5280335	123-78-4	Others
compound00406	4.88_227.1285m/z	2M-H	C6H10O2	48.1	0	-1.52	gamma-Hexalactone		227.129	227.129	4.88	NEG	1691.84	1694.91	1434.17	0.00222091	0.00223494	0.00186399	0.00210662	JBFHTYHTHYHCDJ-UHFFFAOYSA-N	C1CC(CC)OC1=O	HMDB0003843		LMFA07040010		12756	695-06-7	Others
compound00407	8.73_559.2894m/z	M+FA-H	C30H42O7	40.4	0	-3.71	Ganoderenic acid C1		559.291	559.289	8.73	NEG	2777.79	3875.76	3876.64	0.00364646	0.00511066	0.00503848	0.00459853	YTVGSCZIHGRVAV-SBKROVKMSA-N	CC(CC(=O)CC(C)C1CC(=O)[C@]2(C)C3=C(C(=O)C[C@@]12C)[C@]1(C)CCC(=O)C(C)(C)C1C[C@H]3O)C(=O)O						95311-97-0	Terpenes	Triterpenes
compound00408	7.91_573.2686m/z	M+FA-H	C30H40O8	49.6	39.1	-3.59	Ganoderenic acid E	233.1898, 277.1807, 321.1702, 343.1518, 401.1943, 505.2806, 509.2506, 527.2609, 573.2668	573.271	573.269	7.91	NEG	287465	291082	295319	0.377362	0.383828	0.383827	0.381672	UFIFFDILGAASQL-GXDHUFHOSA-N	CC(CC(=O)\C=C(/C)C1CC(=O)C2(C)C3=C(C(=O)C(O)C12C)C1(C)CCC(=O)C(C)(C)C1CC3O)C(O)=O	HMDB0035797	91030			131751865	110241-23-1	Terpenes	Triterpenes
compound00409	8.84_569.2737m/z	M-H	C32H42O9	41.3	0	-3.39	Ganoderic acid F		569.276	569.274	8.84	NEG	3021.32	2203.08	2864.09	0.00396615	0.00290504	0.00372247	0.00353122	BWCNWXLKMWWVBT-AIMUVTGPSA-N	CC(CC(=O)CC(C)C(=O)O)C1CC(=O)C2(C1(C(C(=O)C3=C2C(=O)CC4C3(CCC(=O)C4(C)C)C)OC(=O)C)C)C	HMDB0035988	91173			23247895	98665-15-7	Terpenes	Triterpenes
compound00410	5.37_306.0735n	M+H, M+Na	C15H14O7	47.7	32.9	-1.56	Gallocatechin	163.0387, 187.0386, 205.0492, 215.0336, 307.0807	307.081	307.081	5.37	POS	259540	260358	257958	0.340704	0.343314	0.335268	0.339762	XMOCLSLCDHWDHP-SWLSCSKDSA-N	C1(O)C=C2O[C@H](C3=CC(O)=C(O)C(O)=C3)[C@@H](O)CC2=C(O)C=1	HMDB0038365	47219	LMPK12020002	C12127	65084	970-73-0	Flavonoids	Flavanols
compound00411	13.55_409.3097m/z	M+H	C28H40O2	53.4	0	-1.03	ganodesterone	69.0703, 284.1742, 391.2963, 391.3418, 409.3088	409.31	409.31	13.55	POS	766280	715859	758645	1.00591	0.943948	0.986014	0.978625	RMKUNHROPPZENV-IXWATKSXSA-N	CC(C)C(C)C=CC(C)C1CCC2C1(CCC3C2=CC(=O)C4=CC(=O)CCC34C)C	HMDB0039148	93745			11177299	19698-66-9
compound00412	10.43_437.1569m/z	M+Na	C23H26O7	41.9	0	-0.41	Garcinone C		437.157	437.157	10.43	POS	15742	17862.7	16803.6	0.0206649	0.0235542	0.0218397	0.0220196	HLOCLVMUASBDDP-UHFFFAOYSA-N	CC(C)=CCC1=C(O)C2=C(OC3=CC(O)=C(O)C(CCC(C)(C)O)=C3C2=O)C=C1O	HMDB0029511	86316			44159808	76996-27-5	Phenylpropanoids	Xanthones
compound00413	4.60_198.0887n	M-H2O-H, M-H	C10H14O4	52.8	17.7	-2.74	gardendiol	73.0285, 123.0442, 125.0599, 151.0606, 153.0913, 182.0205, 196.9863, 197.0213, 197.0452, 197.0813	197.082	197.081	4.6	NEG	80973.5	80519.6	82377.5	0.106296	0.106175	0.107066	0.106512	RQRMWYOWQUEKAS-IWSPIJDZSA-N	C1C=C([C@@H]2[C@H]1[C@H](C(=O)OC2)CO)CO
compound00414	6.56_327.0473m/z	M+H	C13H14N2O4S2	40	0	1.54	Gliotoxin		327.047	327.047	6.56	POS	3161.8	3059.36	2921.68	0.00415056	0.00403414	0.00379731	0.00399401	FIVPIPIDMRVLAY-RBJBARPLSA-N	CN1C(=O)C23CC4=CC=CC(C4N2C(=O)C1(SS3)CO)O		68415		C10595	6223	67-99-2	Amino Acids, Peptides and derivatives	Peptides
compound00415	9.69_203.1794m/z	M+H-H2O	C15H24O	55.2	0	-0.18	ZINC02090576		203.179	203.179	9.69	POS	1645.58	1720.89	1834.49	0.00216019	0.0022692	0.00238429	0.00227123	URRFLKHHGNPGCX-TZHPCZLDSA-N	CC1(CC[C@@H]([C@@]23[C@]14[C@@H]2C[C@H](C4)C3(C)C)O)C
compound00416	7.45_301.2020m/z	M-H2O-H	C16H32O6	56	0	-0.23	Decyl glucoside		301.202	301.202	7.45	NEG	9962.72	10378.4	10682.2	0.0130783	0.0136852	0.0138836	0.013549	JDRSMPFHFNXQRB-UHFFFAOYSA-N	CCCCCCCCCCOC1C(C(C(C(O1)CO)O)O)O					62142	59947-99-8
compound00417	3.76_255.0870m/z	2M-H	C6H8O3	42.5	0	-1.66	Furaneol		255.087	255.087	3.76	NEG	15804.5	16935.1	16538.9	0.020747	0.022331	0.0214956	0.0215245	INAXVXBDKKUCGI-UHFFFAOYSA-N	CC1OC(C)=C(O)C1=O	HMDB0040594	95077			19309		Others
compound00418	3.85_385.0773m/z	M+FA-H	C15H16O9	42	0	-0.84	Esculin		385.078	385.077	3.85	NEG	1696.29	1024.26	901.134	0.00222676	0.00135061	0.00117121	0.00158286	XHCADAYNFIFUHF-TVKJYDDYSA-N	OC[C@H]1O[C@@H](OC2=C(O)C=C3OC(=O)C=CC3=C2)[C@H](O)[C@@H](O)[C@@H]1O	HMDB0030820	43929		C09264	5281417	531-75-9	Phenylpropanoids	Coumarins
compound00419	7.71_221.0814m/z	M-H	C12H14O4	40.7	0	-2.29	Ethyl ferulic acid		221.082	221.081	7.71	NEG	1479.09	1657.93	1408.99	0.00194164	0.00218619	0.00183127	0.00198637	ATJVZXXHKSYELS-FNORWQNLSA-N	CCOC(=O)/C=C/c1ccc(O)c(OC)c1						4046-02-0	Phenylpropanoids	Simple phenylpropanoids
compound00420	10.24_315.2538m/z	2M-H	C9H18O2	52	0	-0.81	Ethyl heptoate		315.254	315.254	10.24	NEG	8225.4	9093.77	8606.19	0.0107977	0.0119913	0.0111855	0.0113248	TVQGDYNRXLTQAP-UHFFFAOYSA-N	C(OCC)(=O)CCCCCC	HMDB0000798	5763	LMFA07010984		7797	106-30-9
compound00421	8.92_247.1337m/z	M-H	C15H20O3	59	68.3	-0.88	Eupatolide	112.9846, 135.0805, 178.9569, 203.1436, 206.9868, 226.9932, 247.0011, 247.134	247.134	247.134	8.92	NEG	33011.9	32959.9	34151.8	0.0433354	0.0434617	0.0443872	0.0437281	PDEJECFRCJOMEN-KOKKXWLYSA-N	C/C/1=C/[C@@H]2[C@@H]([C@@H](C/C(=C\CC1)/C)O)C(=C)C(=O)O2						6750-25-0
compound00422	6.78_299.0561m/z	M-H	C16H12O6	57.3	0	-0.17	Fallacinol		299.056	299.056	6.78	NEG	7512.14	7966.01	7978.27	0.00986135	0.0105042	0.0103694	0.010245	WJXSYUJKJSOJOG-UHFFFAOYSA-N	O=C1C2=CC(OC)=CC(O)=C2C(=O)C3=C(O)C=C(C=C13)CO
compound00423	10.66_215.1430m/z	M+H	C15H18O	52.7	0	-0.16	Furanoeudesma 1,3-diene		215.143	215.143	10.66	POS	2370.29	2463.64	2502.33	0.00311153	0.00324861	0.00325229	0.00320414	AUSAHAHDEVYCOC-DZGCQCFKSA-N	CC1=CC=C[C@]2([C@H]1CC3=C(C2)OC=C3C)C						87605-93-4
compound00424	5.47_571.0864m/z	2M-H	C15H10O6	57.9	0	-3.18	Fisetin		571.088	571.086	5.47	NEG	3112.51	3265.28	3278.13	0.00408586	0.00430567	0.0042606	0.00421737	XHEFDIBZLJXQHF-UHFFFAOYSA-N	C1(O)=CC2OC(C3C=C(O)C(O)=CC=3)=C(O)C(=O)C=2C=C1		44206	LMPK12111566	C10041	5281614	528-48-3	Flavonoids	Flavonols
compound00425	5.14_205.0493m/z	M+H-H2O	C11H10O5	42.7	0	-0.86	Fraxidin		205.049	205.049	5.14	POS	1954.87	1908.37	1856.24	0.0025662	0.00251642	0.00241256	0.00249839	QNFBKOHHLAWWTC-UHFFFAOYSA-N	COC1=C(C(=C2C(=C1)C=CC(=O)O2)O)OC		71723		C17479	3083616	525-21-3	Phenylpropanoids	Coumarins
compound00426	4.42_369.0829m/z	M-H	C16H18O10	40.2	0	0.38	Fraxin		369.083	369.083	4.42	NEG	4847	4643.76	5158	0.00636277	0.00612336	0.00670387	0.00639667	CRSFLLTWRCYNNX-YJADWKFMSA-N	COc1cc2ccc(=O)oc2c(O[C@@H]2OC(CO)[C@@H](O)[C@@H](O)C2O)c1O						524-30-1	Phenylpropanoids	Coumarins
compound00427	5.47_221.0452m/z	M-H	C11H10O5	54	0	-1.77	Fraxinol		221.046	221.045	5.47	NEG	1398.01	1507.89	1367.67	0.0018352	0.00198834	0.00177757	0.00186703	PBPNOAHYDPHKFH-UHFFFAOYSA-N	COc1cc2oc(=O)ccc2c(OC)c1O						486-28-2	Phenylpropanoids	Coumarins
compound00428	4.58_191.0344m/z	2M-H	C5H4O2	51.9	12.8	-2.94	Fufural	102.9477, 132.0206, 146.9377, 147.0442, 176.0107, 191.0344	191.035	191.034	4.58	NEG	31393.4	32632.7	33522.2	0.0412108	0.0430302	0.043569	0.0426033	HYBBIBNJHNGZAN-UHFFFAOYSA-N	O=CC1=CC=CO1	HMDB0032914	69936		C14279	7362	98-01-1
compound00429	6.98_348.2297n	M+H-H2O, M+H	C21H32O4	53.7	0	-0.99	fukujusone		349.237	349.237	6.98	POS	12227.6	12021.6	12507.4	0.0160515	0.0158519	0.0162559	0.0160531	ZQBLOEFPHMRSSU-UHFFFAOYSA-N	CC(=O)C1CCC2(C1(CCC3C2(CC=C4C3(CCC(C4)O)C)O)C)O
compound00430	5.14_427.1032m/z	M-H2O-H	C22H22O10	53.9	0	-0.48	Flavecommeletin		427.103	427.103	5.14	NEG	4654.06	3649.62	3967.25	0.00610949	0.00481247	0.00515625	0.0053594	ABRULANJVVJLFI-UHFFFAOYSA-N	COC1=CC2=C(C(=O)C=C(O2)C2=CC=C(O)C=C2)C(O)=C1C1OC(CO)C(O)C(O)C1O	HMDB0258645				369636
compound00431	9.77_237.1848m/z	M+H	C15H24O2	54.1	0	-0.59	Davanone		237.185	237.185	9.77	POS	5831.7	6031.21	6548.64	0.0076554	0.00795289	0.00851129	0.00803986	FJKKZNIYYVEYOL-UHFFFAOYSA-N	CC(C1CCC(C)(O1)C=C)C(=O)CC=C(C)C	HMDB0038178	92914			519782	30810-99-2
compound00432	10.26_437.2679m/z	M+H-H2O	C28H38O5	50.8	0	-1.63	daturilinol	291.1736, 299.0905, 361.2155, 373.2525, 401.2451, 419.2568, 437.1911, 437.1991, 437.2585, 437.2643	437.269	437.268	10.26	POS	408406	408710	417255	0.536123	0.538935	0.542307	0.539122	VSAQSLOWFUCUJI-UHFFFAOYSA-N	CC12CCC3C(C1CCC2C4COC5(CC4OC(=O)C5CO)C)CC=C6C3(C(=O)C=CC6)C
compound00433	7.34_353.0652m/z	M+H	C19H12O7	44.2	0	-0.95	Daphnoretin		353.066	353.065	7.34	POS	3569.44	3780.69	3443.55	0.00468568	0.00498531	0.00447559	0.00471553	JRHMMVBOTXEHGJ-UHFFFAOYSA-N	COC1=C(O)C=C2OC(=O)C(OC3=CC4=C(C=CC(=O)O4)C=C3)=CC2=C1	HMDB0250858	67525		C09216	5281406	2034-69-7	Phenylpropanoids	Coumarins
compound00434	7.64_129.0699m/z	M+H-H2O	C10H10O	49.2	0	0.38	Benzylideneacetone		129.07	129.07	7.64	POS	3759.73	3807.87	3783.85	0.00493549	0.00502114	0.00491788	0.00495817	BWHOZHOGCMHOBV-BQYQJAHWSA-N	CC(=O)\C=C\C1=CC=CC=C1	HMDB0031617	87812			637759	122-57-6	Phenylpropanoids	Simple phenylpropanoids
compound00435	13.12_455.3509m/z	M+H	C30H46O3	51.8	0	-2.38	Betulonic acid		455.352	455.351	13.12	POS	21087.9	21681.2	25684	0.0276825	0.0285894	0.0333816	0.0298845	SLJTWDNVZKIDAU-SVAFSPIFSA-N	C=C(C)[C@@H]1CC[C@]2(C(=O)O)CC[C@]3(C)[C@H](CC[C@@H]4[C@@]5(C)CCC(=O)C(C)(C)[C@@H]5CC[C@]43C)[C@@H]12						4481-62-3	Terpenes	Triterpenes
compound00436	5.42_365.0638m/z	M+K	C15H18O8	47.4	1.33	1.38	Bilobalide	147.0438, 365.0623	365.063	365.064	5.42	POS	62466.6	62292.4	60525.4	0.0820013	0.0821402	0.0786651	0.0809355	MOLPUWBMSBJXER-VWHPSKJVSA-N	CC(C)(C)C1(O)C[C@H]2OC(=O)C[C@]23C(=O)O[C@@H]2OC(=O)[C@H](O)[C@@]213						33570-04-6	Terpenes	Sesquiterpenes
compound00437	8.05_210.1619n	M+H-H2O, M+H, M+NH4	C13H22O2	58.4	79.9	-0.59	Blumenol C	149.1325, 151.1482, 175.1480, 186.9562, 193.1586, 211.1682, 227.2198, 228.1244, 228.1495, 228.1959	228.196	228.196	8.05	POS	81305.2	82012.4	85208.4	0.106731	0.108143	0.110746	0.10854	UEEJDIUOCUCVHN-PWSUYJOCSA-N	CC1=CC(=O)CC([C@H]1CC[C@@H](C)O)(C)C
compound00438	4.10_270.1104n	M+NH4, M+Na	C13H18O6	50.4	0	0.05	Benzyl EC-D-glucopyranoside	293.0984	293.1	293.1	4.1	POS	61182.4	60515.5	61008.1	0.0803155	0.0797971	0.0792925	0.0798017	GKHCBYYBLTXYEV-UHFFFAOYSA-N	OCC1OC(OCC2=CC=CC=C2)C(O)C(O)C1O	HMDB0243491				4984739
compound00439	14.57_470.3626m/z	M+NH4	C30H44O3	45.6	0	-0.56	Boldenone Undecylenate		470.363	470.363	14.57	POS	1826.69	2497.77	2064.72	0.00239793	0.00329361	0.00268352	0.00279169	AHMMSNQYOPMLSX-UHFFFAOYSA-N	CC12CCC3C(CCC4=CC(=O)C=CC34C)C1CCC2OC(=O)CCCCCCCCC=C	HMDB0249340				6422517		Steroids	Other steroids
compound00440	4.41_275.0185m/z	M+H-H2O	C13H8O8	40.1	0	-0.31	Brevifolincarboxylic acid		275.019	275.019	4.41	POS	2325.8	2572.21	2578.2	0.00305313	0.00339177	0.0033509	0.00326527	JFJWMFPFMLRLMI-UHFFFAOYSA-N	OC(=O)C1CC(=O)C2=C1C1=C(C=C(O)C(O)=C1O)C(=O)O2	HMDB0303676						Phenylpropanoids	Coumarins
compound00441	4.21_337.0208m/z	M+FA-H	C13H8O8	50.6	0	2.16	brevioflin carboxylic acid		337.02	337.021	4.21	NEG	1492.21	1348.4	1527.67	0.00195886	0.00177803	0.00198551	0.00190747	JFJWMFPFMLRLMI-VKHMYHEASA-N	C1[C@@H](C2=C(C1=O)OC(=O)C3=CC(=C(C(=C32)O)O)O)C(=O)O						18490-95-4
compound00442	5.01_415.1001m/z	M+Na	C19H20O9	50.9	0	0.38	breynioside a		415.1	415.1	5.01	POS	10899.6	11892.5	12032.5	0.0143081	0.0156818	0.0156386	0.0152095	FTFZXPBVBBJTHV-OGJJZOIMSA-N	C1=CC(=CC=C1C(=O)OC[C@@H]2[C@H]([C@@H]([C@H]([C@@H](O2)OC3=CC=C(C=C3)O)O)O)O)O
compound00443	5.53_265.1444m/z	M-H	C15H22O4	56.6	0	-0.33	britannilactone		265.144	265.144	5.53	NEG	9141.02	8667.3	8641.09	0.0119996	0.0114289	0.0112309	0.0115531	ASZIGQFYGXSPCO-UHFFFAOYSA-N	CC1=C(C(C2C(C1)OC(=O)C2=C)O)C(C)CCCO					137706164	33620-72-3
compound00444	6.29_417.2263m/z	M+H	C24H32O6	53.4	0	-2.1	Bufotalidin		417.227	417.226	6.29	POS	7058.58	7701.78	7535.26	0.00926595	0.0101557	0.00979361	0.00973844	TVKPTWJPKVSGJB-XHCIOXAKSA-N	C1[C@@]2(C=O)[C@](O)(CC[C@]3([H])[C@]2([H])CC[C@]2(C)[C@@]([H])(C4C=CC(=O)OC=4)CC[C@]32O)C[C@@H](O)C1		57796	LMST01130004	C16969	16070014		Steroids	Other steroids
compound00445	12.42_256.2631m/z	M+NH4	C16H30O	47.1	13.9	-1.43	Bombykol	256.2628	256.264	256.263	12.42	POS	734560	837852	864063	0.964273	1.10481	1.12303	1.06404	CIVIWCVVOFNUST-SCFJQAPRSA-N	C(=C/C=C\CCC)\CCCCCCCCCO		36465	LMFA05000007	C16873	445128		Others
compound00446	6.62_263.0561m/z	M+FA-H	C12H10O4	42.1	0	0.02	Baldrinal		263.056	263.056	6.62	NEG	3901.36	4027.26	3642.18	0.0051214	0.00531043	0.00473376	0.0050552	QIUOVIRIFZOCLL-UHFFFAOYSA-N	CC(=O)OCC1=COC=C2C1=CC=C2C=O		71361		C16811	159846	18234-46-3	Terpenes	Monoterpenes
compound00447	5.03_507.2201m/z	M+H	C26H34O10	40.7	0	-4.65	Aviculin		507.223	507.22	5.03	POS	5676.35	5322.23	6617.45	0.00745147	0.00701802	0.00860073	0.00769007	FPJFPMQEUVMUKU-CDDCGRQRSA-N	COc1cc([C@H]2c3cc(O)c(OC)cc3C[C@@H](CO)[C@@H]2CO[C@@H]2O[C@@H](C)[C@H](O)[C@@H](O)[C@H]2O)ccc1O						156765-33-2	Phenylpropanoids	Lignans
compound00448	5.34_301.0484m/z	M+K	C14H14O5	50.4	0	4.36	angelidiol	269.0267, 269.5289, 271.5294, 272.0303, 280.5349, 281.0362, 287.0534, 289.5409, 292.0425, 301.0363	301.047	301.048	5.34	POS	36013.2	29335.5	29172.7	0.0472753	0.0386824	0.0379159	0.0412912	QWQZTILKTKQJTA-SMDDNHRTSA-N	C[C@@](CO)([C@@H]1CC2=C(O1)C=CC3=C2OC(=O)C=C3)O
compound00449	6.83_396.0842n	M+H, M+Na	C21H16O8	52.6	0	-0.69	Anthraxin		397.092	397.091	6.83	POS	27399.9	27171.6	27067.9	0.0359684	0.0358292	0.0351803	0.0356593	PCZOXSAHVHZWPF-UHFFFAOYSA-N	CC(CC1=CC(=O)C2=C(O1)C=C(C3=C2OC(=CC3=O)C4=CC(=C(C=C4)O)O)O)O					101515731
compound00450	12.47_339.2314m/z	M-H	C23H32O2	40.1	1.87	-4.56	Antioxidant 2246	339.1995	339.233	339.231	12.47	NEG	35485.9	27109.5	23657.4	0.0465831	0.0357473	0.0307477	0.0376927	KGRVJHAUYBGFFP-UHFFFAOYSA-N	CC1=CC(CC2=CC(C)=CC(=C2O)C(C)(C)C)=C(O)C(=C1)C(C)(C)C	HMDB0244434				8398		Others
compound00451	0.73_152.0684n	M+Na, M+K, M+H-H2O	C5H12O5	41.3	5.75	-0.34	Arabinitol	116.0053, 116.0706, 118.5081, 127.5131, 129.1020, 137.0014, 139.0210, 146.0069, 174.1229, 175.0573	175.058	175.058	0.73	POS	671989	649361	637315	0.882135	0.856262	0.828321	0.855572	HEBKCHPVOIAQTA-IMJSIDKUSA-N	OC[C@H](O)C(O)[C@@H](O)CO	HMDB0001851	141		C00532	439255	7643-75-6	Carbohydrates and Glycosides	Carbohydrates
compound00452	9.51_571.2895m/z	M-H	C32H44O9	41	0	-3.08	Arenobufagin 3-hemisuberate		571.291	571.289	9.51	NEG	7388.76	6292.11	6999.28	0.00969938	0.00829693	0.00909699	0.0090311	LYCCSNYEMCXNRM-QCTKBPTFSA-N	C[C@]12CC[C@H](OC(=O)CCCCCCC(=O)O)C[C@H]1CC[C@@H]1[C@@H]2[C@H](O)C(=O)[C@]2(C)[C@@H](c3ccc(=O)oc3)CC[C@]12O						30219-16-0	Steroids	Other steroids
compound00453	5.36_315.0510m/z	M-H	C16H12O7	46.6	13.9	0	Azaleatin	111.0077, 159.0444, 203.0343, 229.0505, 243.0661, 271.0607, 315.0134, 315.0512	315.051	315.051	5.36	NEG	101556	104875	105088	0.133315	0.138291	0.136583	0.136063	RJBAXROZAXAEEM-UHFFFAOYSA-N	C1(O)=CC2OC(C3C=C(O)C(O)=CC=3)=C(O)C(=O)C=2C(OC)=C1		50961	LMPK12112546	C10022	5281604		Flavonoids	Flavonols
compound00454	9.46_246.1252n	M+H-H2O, M+H	C15H18O3	43	0	-1.48	Arglabin		247.133	247.132	9.46	POS	11605.2	11859.8	12739.1	0.0152344	0.0156386	0.016557	0.01581	UVJYAKBJSGRTHA-ZFFQGIBWSA-N	C=C1C(=O)OC2C1CC[C@@]1(C)O[C@]13CC=C(C)C23						84692-91-1	Alkaloids
compound00455	7.94_263.1288m/z	M-H2O-H	C15H22O5	50.4	0	-0.46	artemisinin g		263.129	263.129	7.94	NEG	11837.6	12048.5	11766.7	0.0155395	0.0158874	0.0152933	0.0155734	GUSFNHMDMCPUPO-DYLBMRNYSA-N	C[C@@H]1CC[C@H]2[C@H](C(=O)O[C@@H]([C@@]23[C@H]1CCO3)OC(=O)C)C
compound00456	0.75_221.0296m/z	M+FA-H	C6H8O6	52.2	64.8	-3.84	ascorbyl	59.0128, 71.0128, 72.9921, 73.0284, 85.0285, 129.0184, 154.9977, 203.0191, 221.0297	221.03	221.03	0.75	NEG	97932	98605	103972	0.128557	0.130023	0.135133	0.131238	CIWBSHSKHKDKBQ-UHFFFAOYSA-N	OCC(O)C1OC(=O)C(O)=C1O	HMDB0248647	86606			54676860
compound00457	9.63_467.1936m/z	M+Na	C27H28N2O4	40.8	0	-1.24	Aurantiamide acetic acid		467.194	467.194	9.63	POS	8552.77	8684.01	8691.04	0.0112274	0.0114509	0.0112958	0.0113247	VZPAURMDJZOGHU-SKCDSABHSA-N	O=C(OCC(N=C(O)C(N=C(O)C=1C=CC=CC1)CC=2C=CC=CC2)CC=3C=CC=CC3)C					124319	56121-42-7	Amino Acids, Peptides and derivatives	Peptides
compound00458	5.26_245.1169m/z	M+H-H2O	C15H18O4	51.7	0	-1.15	Austricine		245.117	245.117	5.26	POS	4508.91	4327.36	3876.03	0.00591894	0.00570615	0.0050377	0.00555426	YMUOZXZDDBRJEP-UHFFFAOYSA-N	CC1C2C(OC1=O)C1C(C)=CC(=O)C1=C(C)CC2O	HMDB0303511				99114
compound00459	8.44_309.2071m/z	M-H2O-H	C18H32O5	53.7	0	-0.16	Auxin a	71.0492, 104.953, 183.1021, 308.9991, 309.2072	309.207	309.207	8.44	NEG	41358.3	42001.9	42418.8	0.0542919	0.0553847	0.0551319	0.0549362	RKOUCPMGBBKLNK-UHFFFAOYSA-N	CCC(C)C1CC(C(C)CC)C(=C1)C(O)CC(O)C(O)C(O)=O	HMDB0038483	93162			92772
compound00460	9.26_309.2071m/z	M-H	C18H30O4	59.4	71.5	0.01	Auxin b	207.1384, 209.1169, 209.1528, 224.9945, 268.9835, 288.9899, 291.1965, 308.9958, 309.1701, 309.2072	309.207	309.207	9.26	NEG	82550.8	82756.5	86911.8	0.108366	0.109125	0.11296	0.11015	MQETZQLZTJUQHR-UHFFFAOYSA-N	CCC(C)C1CC(C(C)CC)C(=C1)C(O)CC(=O)CC(O)=O	HMDB0038484	93163			103739
compound00461	4.93_235.0600m/z	M+H	C12H10O5	50.6	28.4	-0.45	Armillarisin A	235.0596	235.06	235.06	4.93	POS	132456	136362	137130	0.173877	0.17981	0.178229	0.177305	XVZWWNMZVZWQKU-UHFFFAOYSA-N	CC(=O)C1=CC2=C(CO)C=C(O)C=C2OC1=O	HMDB0248606						Phenylpropanoids	Coumarins
compound00462	6.02_495.2609m/z	M-H	C26H40O9	41.3	0	1.87	Andropanoside		495.26	495.261	6.02	NEG	4778.66	4969.99	5264.44	0.00627305	0.00655354	0.00684222	0.00655627	MEEPUSVTMHGIPC-MVGASCEISA-N	C=C1CC[C@H]2[C@@](C)(CC[C@@H](O)[C@@]2(C)CO[C@@H]2O[C@H](CO)[C@@H](O)[C@H](O)[C@H]2O)[C@@H]1CCC1=CCOC1=O						82209-72-1	Terpenes	Diterpenes
compound00463	6.27_357.0947m/z	M+Na	C17H18O7	41.4	0	0.81	Byakangelicin		357.094	357.095	6.27	POS	6676.26	6445.34	6871.26	0.00876408	0.00849897	0.00893061	0.00873122	PKRPFNXROFUNDE-LLVKDONJSA-N	CC(C)(C(COC1=C2C(=C(C3=C1OC(=O)C=C3)OC)C=CO2)O)O		67462		C09141	10211	482-25-7	Phenylpropanoids	Coumarins
compound00464	12.96_383.3303m/z	M+H-H2O	C27H44O2	40.5	0	-1.44	Calcifediol		383.331	383.33	12.96	POS	5376.57	5434.63	4904.25	0.00705794	0.00716623	0.00637408	0.00686608	JWUBBDSIWDLEOM-DTOXIADCSA-N	C1C(=C)/C(=C\C=C2\[C@]3([H])CC[C@@]([H])([C@@]3(C)CCC\2)[C@]([H])(C)CCCC(O)(C)C)/C[C@@H](O)C1	HMDB0003550	42183	LMST03020246	C01561	5283731	19356-17-3	Steroids	Other steroids
compound00465	5.43_379.0448m/z	2M-H	C10H6O4	41.9	2.18	-3.04	Coumarin-3-carboxylic acid	245.0453, 257.0452, 268.0737, 291.0638, 293.0818, 335.0573, 335.0924, 378.0728, 379.0420, 379.0475	379.046	379.045	5.43	NEG	80341	81047.6	84553.1	0.105465	0.106871	0.109894	0.10741	ACMLKANOGIVEPB-UHFFFAOYSA-N	O=C(O)c1cc2ccccc2oc1=O						531-81-7	Phenylpropanoids	Coumarins
compound00466	7.23_573.3045m/z	M-H	C32H46O9	54	0	-4.22	Cucurbitacin A		573.307	573.304	7.23	NEG	29886.8	31388.4	31704	0.039233	0.0413894	0.0412058	0.0406094	IHTCCHVMPGDDSL-IVNGUWCNSA-N	[C@@]12(CO)C(=O)C[C@]3(C)[C@]([H])([C@H](O)C[C@@]3(C)[C@]1([H])CC=C1C(C)(C)C([C@@H](O)C[C@@]21[H])=O)[C@](O)(C)C(=O)/C=C/C(C)(C)OC(=O)C		41666	LMST01010103	C08793	5281315		Terpenes	Triterpenes
compound00467	9.79_555.2952m/z	M-H	C32H44O8	45.7	0	-2.1	Cucurbitacin E		555.296	555.295	9.79	NEG	27663.5	27639.9	30381.8	0.0363145	0.0364466	0.0394874	0.0374162	NDYMQXYDSVBNLL-MUYMLXPFSA-N	[C@@]12(C)C[C@H]([C@]([H])([C@](O)(C)C(=O)/C=C/C(C)(C)OC(=O)C)[C@@]1(C)CC([C@@]1(C)[C@]3([H])C=C(C(=O)C(C)(C)C3=CC[C@@]21[H])O)=O)O		41670	LMST01010107	C08797	5281319	18444-66-1	Terpenes	Triterpenes
compound00468	8.11_559.2901m/z	M+FA-H	C30H42O7	50.4	0	-2.19	Cucurbitacin I		559.291	559.29	8.11	NEG	59199.3	58932.7	59317.2	0.0777123	0.07771	0.0770948	0.0775057	NISPVUDLMHQFRQ-MKIKIEMVSA-N	[C@@]12(C)C[C@H]([C@]([H])([C@](O)(C)C(=O)/C=C/C(O)(C)C)[C@@]1(C)CC([C@@]1(C)[C@]3([H])C=C(C(=O)C(C)(C)C3=CC[C@@]21[H])O)=O)O		41673	LMST01010110	C08800	5281321		Terpenes	Triterpenes
compound00469	6.56_287.1251m/z	M+Na	C15H20O4	40.8	0	-0.9	Curcolonol		287.125	287.125	6.56	POS	8018.93	7661.97	8247.42	0.0105266	0.0101032	0.0107192	0.0104497	QXEXMTIZXNCRJO-QPKOPYBWSA-N	CC1=COC2=C1C(=O)C3C(CCC(C3(C2)C)O)(C)O	HMDB0033227	89094			10683031	217817-09-9	Terpenes	Sesquiterpenes
compound00470	6.49_245.0817m/z	M-H	C14H14O4	42.3	0	-1.04	Columbianetin		245.082	245.082	6.49	NEG	3997.94	4037.87	3856.91	0.00524818	0.00532443	0.00501284	0.00519515	YRAQEMCYCSSHJG-NSHDSACASA-N	CC(C)(C1CC2=C(O1)C=CC3=C2OC(=O)C=C3)O		73310		C19707	92201	3804-70-4	Phenylpropanoids	Coumarins
compound00471	5.32_521.3119m/z	M+H	C29H44O8	45.5	0	1.86	Cyasterone		521.311	521.312	5.32	POS	10120.4	10326.9	9179.51	0.0132853	0.0136173	0.0119306	0.0129444	NEFYSBQJYCICOG-OLCXOBSESA-N	CC1C(=O)O[C@H](C)[C@@H]1CC(O)[C@](C)(O)[C@H]1CC[C@@]2(O)C3=CC(=O)C4CC(O)C(O)C[C@]4(C)[C@H]3CC[C@]12C						17086-76-9	Steroids	Other steroids
compound00472	10.01_487.2690m/z	M+H-H2O	C28H40O8	40.3	0	0.01	Cynatratoside A		487.269	487.269	10.01	POS	4364.16	4177.85	5209.74	0.00572893	0.005509	0.00677112	0.00600302	QANVGLGBLJFUIP-UHFFFAOYSA-N	COC1CC(OC2CCC3(C)C(=CCC4C(=O)OC5COC6(C)OC=C(CCC43)C56)C2)OC(C)C1O						97399-96-7	Steroids	Other steroids
compound00473	9.57_474.2629m/z	M-H2O-H	C30H39NO5	42.2	0.0127	-4.29	Cytochalasin N	277.217, 397.2377, 415.2489, 473.291, 474.2588, 474.277	474.265	474.263	9.57	NEG	183197	195972	205823	0.240487	0.258413	0.267509	0.25547	WFSYATBEJTUDQA-BBXOWAOSSA-N	CC1CC=CC2C(C(=C(C3C2(C(C=CC(C1)(C)O)OC(=O)C)C(=O)NC3CC4=CC=CC=C4)C)C)O	HMDB0035367	90665			6442848	108050-28-8	Others
compound00474	10.57_345.1669m/z	M+Na	C18H26O5	41.8	0	-1.03	Cytosporone B		345.167	345.167	10.57	POS	15720.9	15775	15465.6	0.0206372	0.0208013	0.0201007	0.0205131	UVVWQQKSNZLUQA-UHFFFAOYSA-N	CCCCCCCC(=O)C1=C(CC(=O)OCC)C=C(O)C=C1O	HMDB0250727				10687292		Phenols	Polyphenols
compound00475	4.55_223.0245m/z	M+FA-H	C9H6O4	46.1	0	-1.69	Daphnetin		223.025	223.024	4.55	NEG	12709.1	13351.2	13391.1	0.0166836	0.0176052	0.0174045	0.0172311	ATEFPOUAMCWAQS-UHFFFAOYSA-N	C1=CC(=C(C2=C1C=CC(=O)O2)O)O		65905		C03093	5280569	486-35-1	Phenylpropanoids	Coumarins
compound00476	4.02_385.0779m/z	M+FA-H	C15H16O9	45.8	0	0.78	Daphnin		385.078	385.078	4.02	NEG	9425.56	9643.87	10941.6	0.0123731	0.0127166	0.0142209	0.0131036	HOIXTKAYCMNVMY-PVOAASPHSA-N	C1=CC(=C(C2=C1C=CC(=O)O2)O)OC3C(C(C(C(O3)CO)O)O)O		65594		C01421	439499	486-55-5	Phenylpropanoids	Coumarins
compound00477	4.84_287.0548m/z	M+	C15H11O6+	43	0	-2.75	Cyanidin		287.056	287.055	4.84	POS	9589.2	9026.72	9113.07	0.012588	0.0119028	0.0118443	0.0121117	VEVZSMAEJFVWIL-UHFFFAOYSA-O	C1(O)C=C2[O+]=C(C3=CC=C(O)C(O)=C3)C(O)=CC2=C(O)C=1	HMDB0002708	419517	LMPK12010002	C05905	128861	13306-05-3	Flavonoids	Anthocyanins
compound00478	5.45_291.0874m/z	M-H	C15H16O6	50.4	0	0.1	Cnidimol B		291.087	291.087	5.45	NEG	2240.94	2237.34	1994.15	0.00294173	0.0029502	0.00259181	0.00282791	PSGAVROSGDHSNP-UHFFFAOYSA-N	CC1=CC(=O)C2=C(C3=C(C=C2O1)OC(C3)C(C)(CO)O)O					21603473	103629-81-8
compound00479	4.93_549.2706m/z	M-H2O-H	C29H44O11	50.7	0	0.2	Canesceol		549.27	549.271	4.93	NEG	5645.33	5648.45	6468.26	0.00741075	0.00744818	0.00840683	0.00775525	BUGNRCRUPAIYMD-UHFFFAOYSA-N	CC1OC(OC2CCC3(CO)C4C(O)CC5(C)C(CCC5(O)C4CCC3(O)C2)C2=CC(=O)OC2)C(O)C(O)C1O	HMDB0034084	89704			3729509	82228-15-7
compound00480	10.22_305.1757m/z	M-H	C18H26O4	53.6	0	-0.47	Capsiate		305.176	305.176	10.22	NEG	1721.34	3321.68	3092.89	0.00225964	0.00438004	0.00401985	0.00355318	ZICNYIDDNJYKCP-SOFGYWHQSA-N	COC1=C(O)C=CC(COC(=O)CCCC\C=C\C(C)C)=C1	HMDB0034780	90202		C20203	9839519		Alkaloids
compound00481	7.75_237.1847m/z	M+H	C15H24O2	57.8	69.9	-0.92	Capsidiol	131.0854, 133.1012, 145.1009, 159.1166, 161.1322, 201.1633, 219.1737, 237.1082, 237.1476, 237.1843	237.185	237.185	7.75	POS	40489.3	41148.2	41404.2	0.0531512	0.0542589	0.0538132	0.0537411	BXXSHQYDJWZXPB-OKNSCYNVSA-N	[C@@]12(C)[C@H](C)[C@@H](C[C@@H](O)C1=CC[C@@H](C(C)=C)C2)O	HMDB0002352	53420	LMPR0103250002	C09627	161937	37208-05-2
compound00482	10.41_197.1536m/z	M+H	C12H20O2	52.6	0	-0.08	Carhydrine		197.154	197.154	10.41	POS	1431.93	1513.37	1398.86	0.00187973	0.00199556	0.0018181	0.0018978	TUSIZTVSUSBSQI-UHFFFAOYSA-N	CC1CCC(CC1OC(C)=O)C(C)=C	HMDB0041469	95861			30248	20777-49-5
compound00483	14.03_312.3255m/z	M+NH4	C20H38O	53.3	0	-2.06	cassipourol		312.326	312.325	14.03	POS	49511.6	54005.8	53966.5	0.064995	0.0712133	0.0701405	0.0687829	UDNYCQANCWSNDB-MBNCDAFSSA-N	C[C@H]1CCCC([C@H]1CCC(C)CCC/C(=C/CO)/C)(C)C
compound00484	6.45_523.1247m/z	M-H2O-H	C27H26O12	50.7	0	0.22	cleistanthin-B		523.125	523.125	6.45	NEG	9068.33	9921.81	8955.67	0.0119042	0.0130831	0.0116397	0.012209	BJGIWVGXMRUMNA-WBYCZGBQSA-N	COC1=C(C=C2C(=C1)C(=C3C(=C2O[C@H]4[C@@H]([C@H]([C@@H]([C@H](O4)CO)O)O)O)COC3=O)C5=CC6=C(C=C5)OCO6)OC
compound00485	4.24_289.0718m/z	M-H	C15H14O6	42.4	0	0.3	Catechin		289.072	289.072	4.24	NEG	3336.95	4079.38	4348.44	0.00438049	0.00537916	0.00565168	0.00513711	PFTAWBLQPZVEMU-DZGCQCFKSA-N	C1(O)C=C2O[C@H](C3=CC=C(O)C(O)=C3)[C@@H](O)CC2=C(O)C=1	HMDB0002780	3419	LMPK12020001	C06562	9064	154-23-4	Flavonoids	Flavanols
compound00486	9.74_491.3000m/z	M+H	C28H42O7	47.3	16.3	-0.74	Caudatin	205.0493, 227.0330, 245.0440, 287.0526, 347.2209, 363.2158, 379.0820, 381.0970, 407.0738, 491.0972	491.3	491.3	9.74	POS	44301.3	44495.5	44924.1	0.0581553	0.0586728	0.0583881	0.0584054	VWLXIXALPNYWFH-ULDUQPHWSA-N	CC(=O)[C@@]1(O)CC[C@]2(O)[C@]3(O)CC=C4CC(O)CC[C@]4(C)C3CC(OC(=O)C=C(C)C(C)C)[C@]12C						38395-02-7	Steroids	Other steroids
compound00487	9.88_487.3418m/z	M-H	C30H48O5	49.8	0	-2.21	Caulophyllogenin		487.343	487.342	9.88	NEG	6090.24	6557.52	6217.68	0.0079948	0.0086469	0.00808114	0.00824095	FABOBEOYNMHSHB-UAWZMHPWSA-N	C[C@]12CC[C@@H]([C@@]([C@@H]1CC[C@@]3([C@@H]2CC=C4[C@]3(C[C@H]([C@@]5([C@H]4CC(CC5)(C)C)C(=O)O)O)C)C)(C)CO)O						52936-64-8	Terpenes	Triterpenes
compound00488	6.29_415.1035m/z	M-H	C21H20O9	54.4	0	0.02	Chrysophanol 8-O-glucoside		415.103	415.103	6.29	NEG	14198.9	14695.5	14976	0.0186393	0.0193778	0.0194644	0.0191605	WMMOMSNMMDMSRB-JNHRPPPUSA-N	C12C(=O)C3=C(C=C(C=C3O)C)C(=O)C=1C=CC=C2O[C@H]1[C@H](O)[C@H]([C@H](O)[C@@H](CO)O1)O		418778	LMPK13040007	C10316	442731		Quinones	Anthraquinones
compound00489	6.62_193.0500m/z	M+FA-H	C9H8O2	42	0	-4.31	Cinnamic acid		193.051	193.05	6.62	NEG	2403.64	2448.03	2385.24	0.00315531	0.00322803	0.00310011	0.00316115	WBYWAXJHAXSJNI-VOTSOKGWSA-N	OC(=O)\C=C\C1=CC=CC=C1	HMDB0000930	310		C10438	444539	140-10-3	Phenylpropanoids	Simple phenylpropanoids
compound00490	7.15_311.0562m/z	M-H2O-H	C17H14O7	57.1	0	0.15	Cirsiliol		311.056	311.056	7.15	NEG	5392.4	5855.52	5354.58	0.00707872	0.00772122	0.00695937	0.0072531	IMEYGBIXGJLUIS-UHFFFAOYSA-N	C1(OC)=CC2OC(C3C=CC(O)=C(O)C=3)=CC(=O)C=2C(O)=C1OC	HMDB0250275	49652	LMPK12111227	C10033	160237		Flavonoids	Flavones
compound00491	5.04_423.0723m/z	M-H2O-H	C22H18O10	41.5	0	0.28	Catechin gallate		423.072	423.072	5.04	NEG	194219	191389	196848	0.254955	0.25237	0.255844	0.25439	LSHVYAFMTMFKBA-CTNGQTDRSA-N	C1(O)C=C2O[C@@H](C3C=C(O)C(O)=CC=3)[C@H](OC(C3C=C(O)C(O)=C(O)C=3)=O)CC2=C(O)C=1	HMDB0029255	47307	LMPK12020091		6419835	130405-40-2	Flavonoids	Flavanols
