# Supplementary figures and images for: UPLC-MS metabolite profiling and antioxidant activity of Sanghuangporus sanghuang extract (part 1 of 2)
Source: PeerJ journal article supplement (doi:10.7717/peerj.18758), 2025-01-22

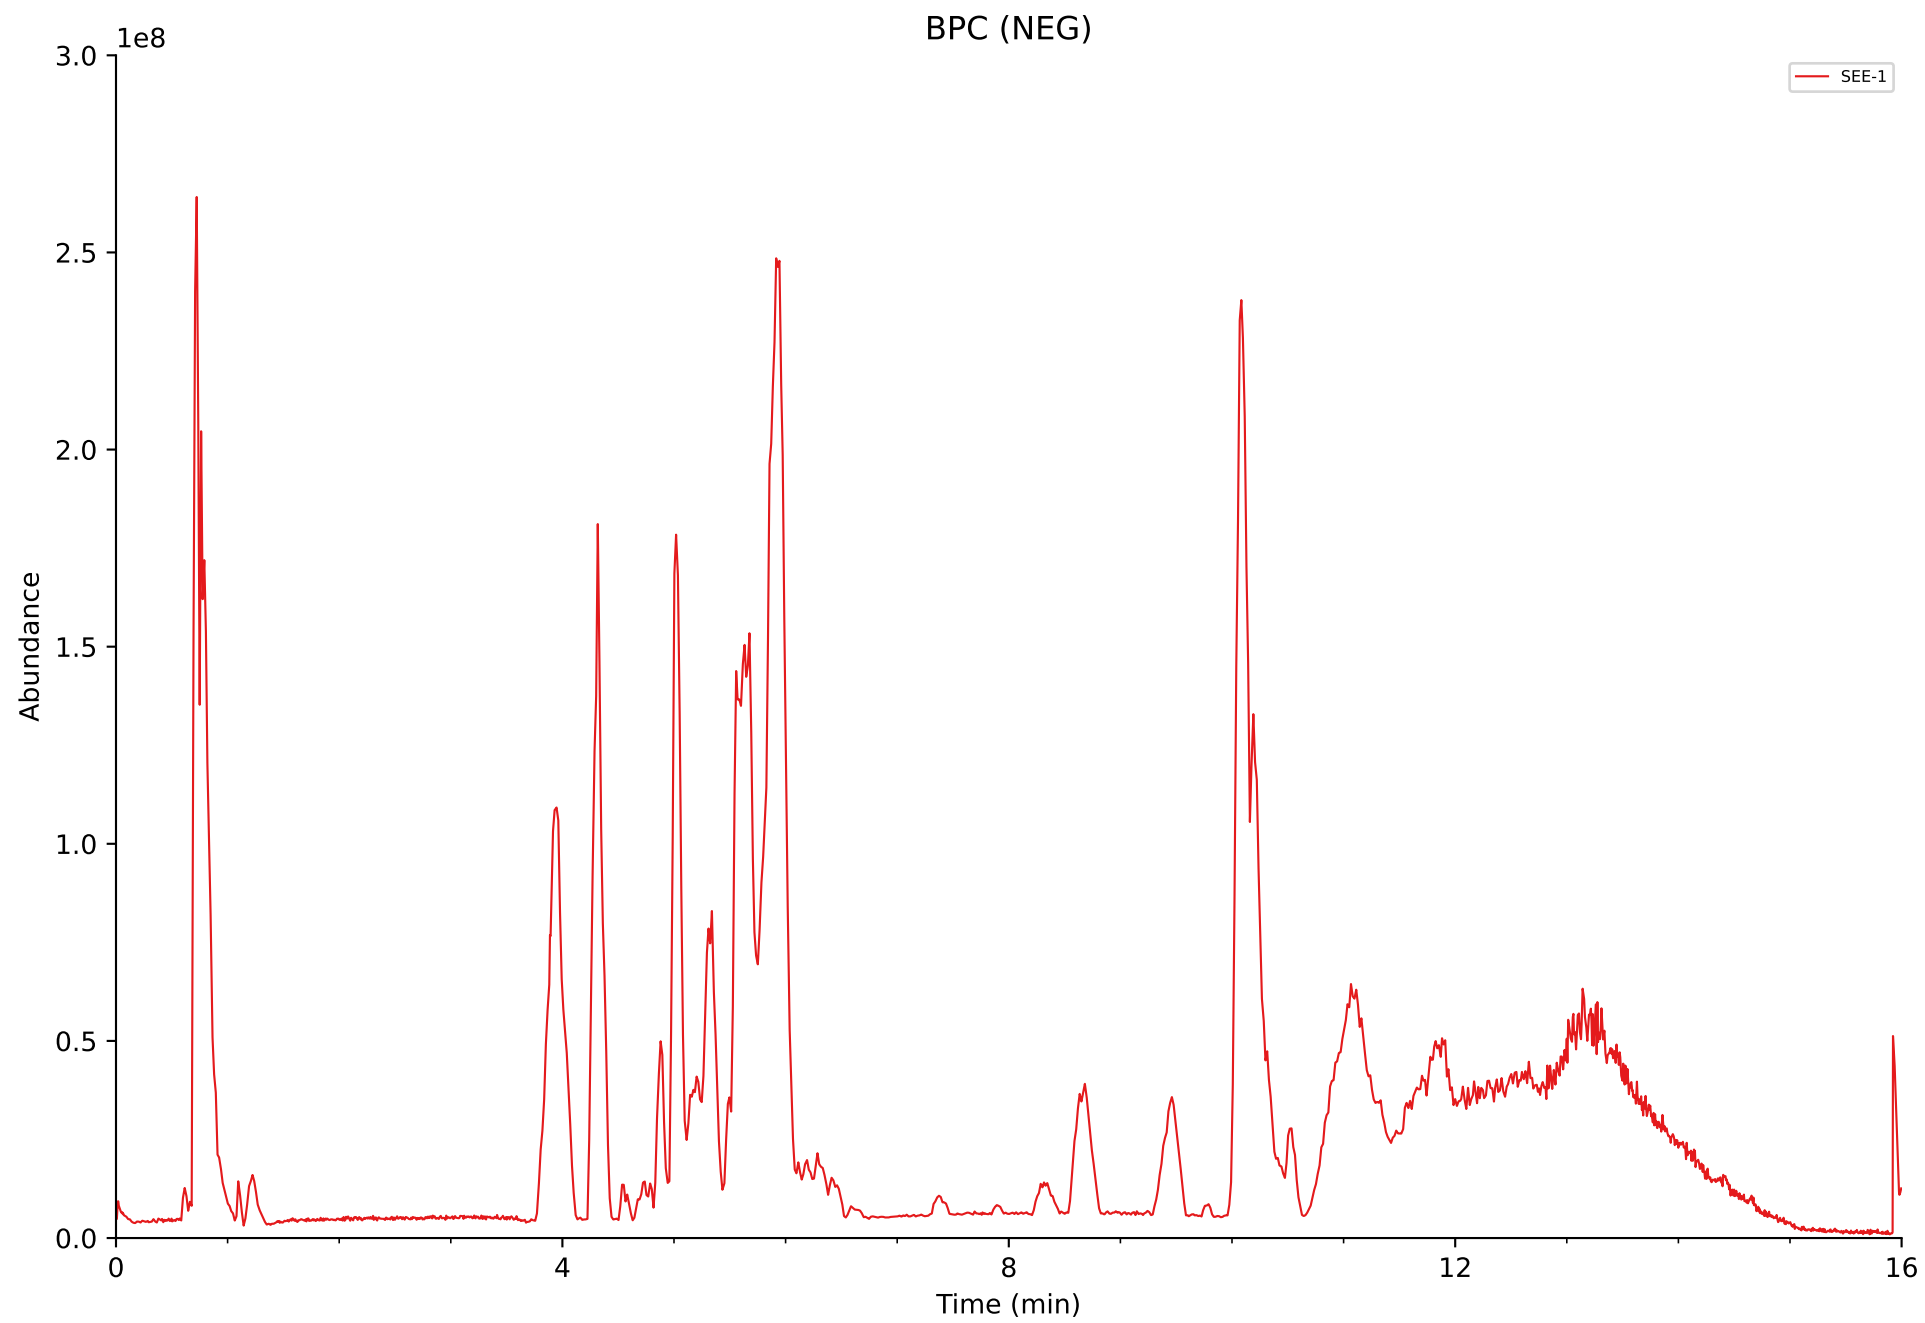

Supplement: identification_of_ingredients.zip [file BPC-NEG-SEE-1.pdf › identification of ingredients/Data analysis/2.chromatogram/BPC-NEG-SEE-1.pdf]

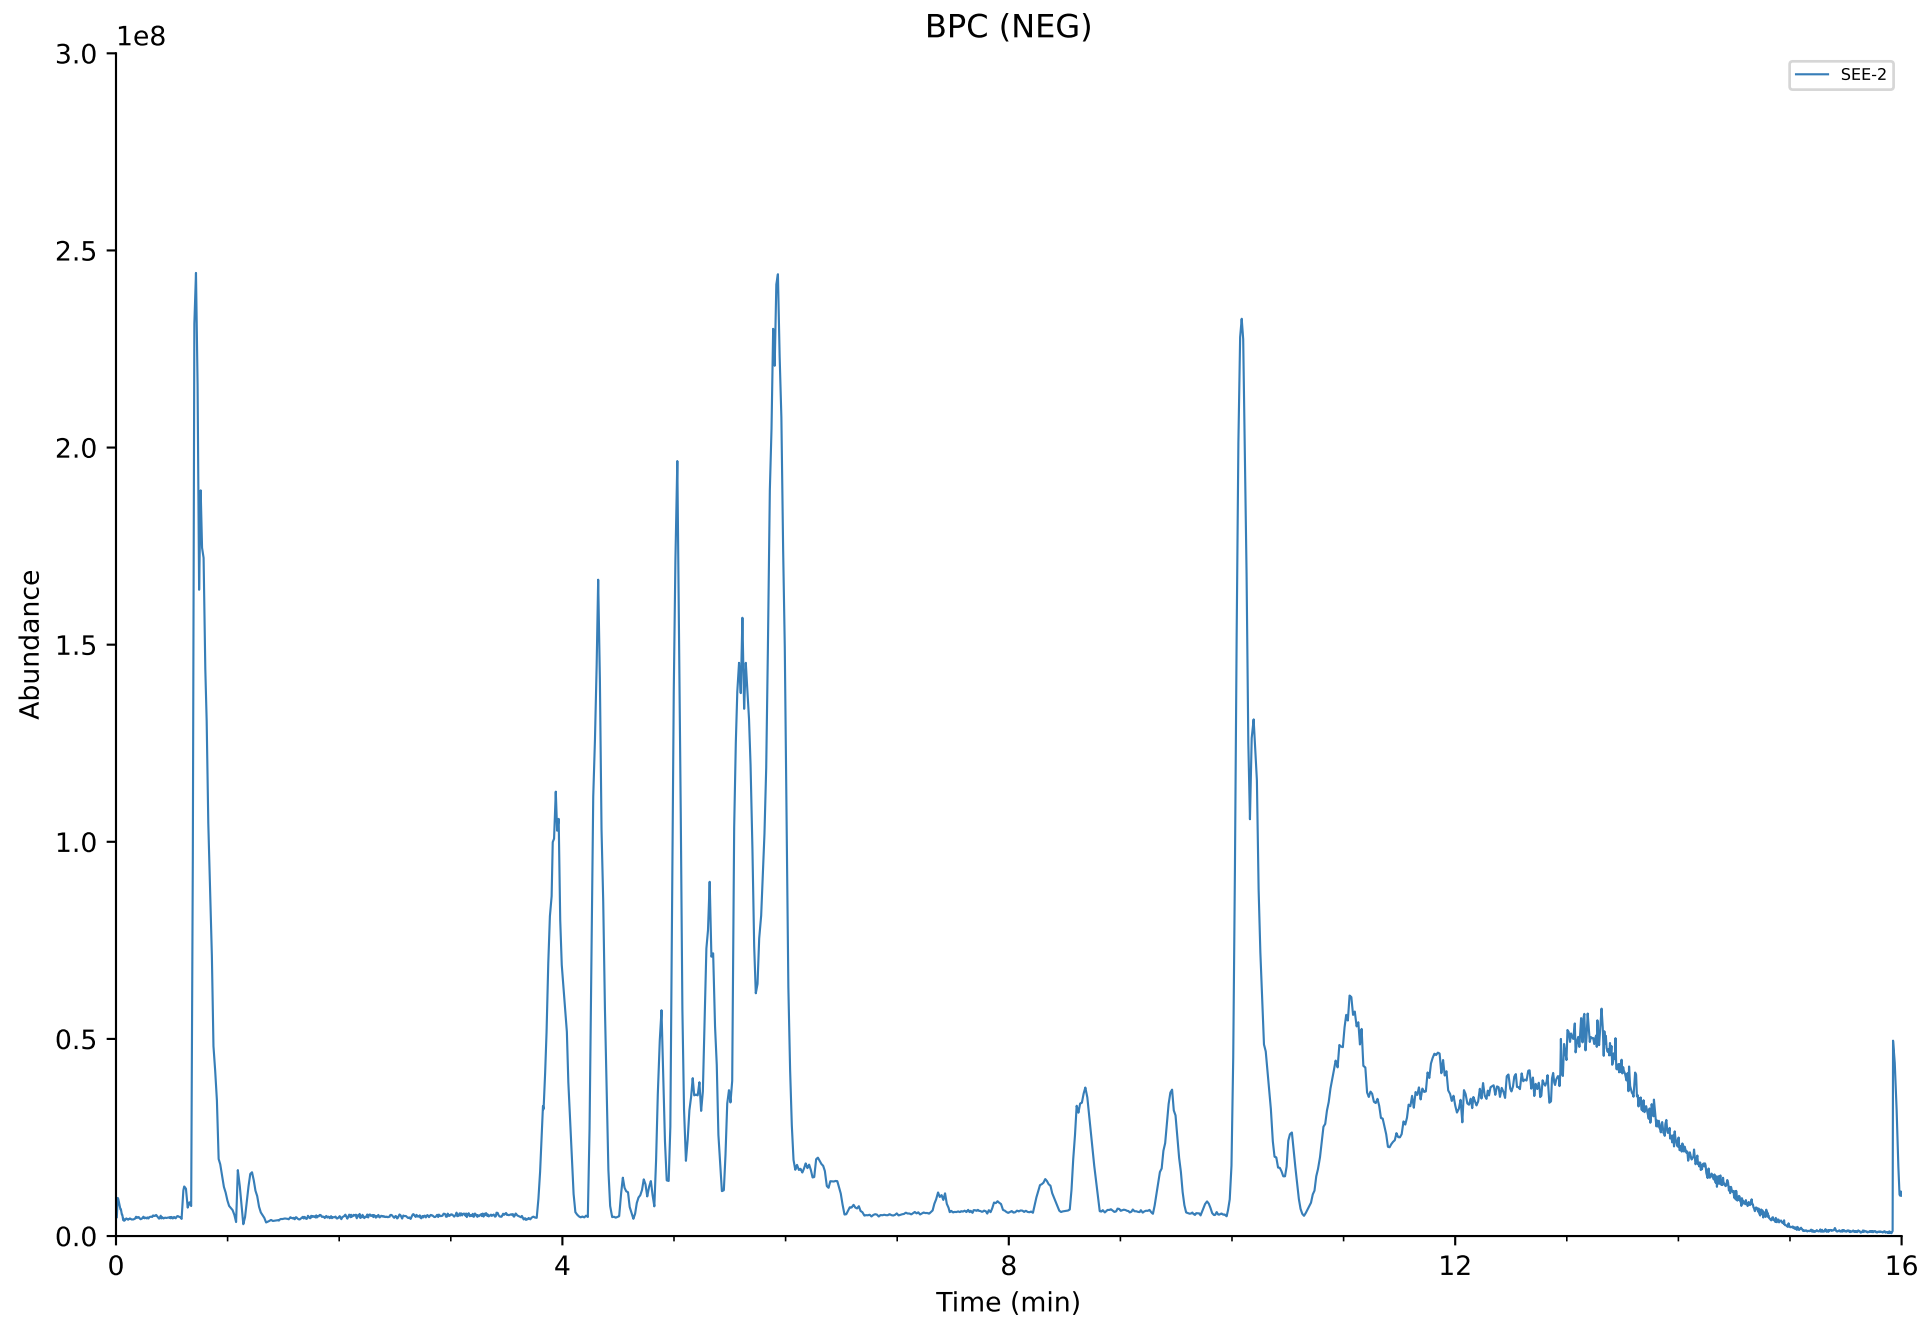

Supplement: identification_of_ingredients.zip [file BPC-NEG-SEE-2.pdf › identification of ingredients/Data analysis/2.chromatogram/BPC-NEG-SEE-2.pdf]

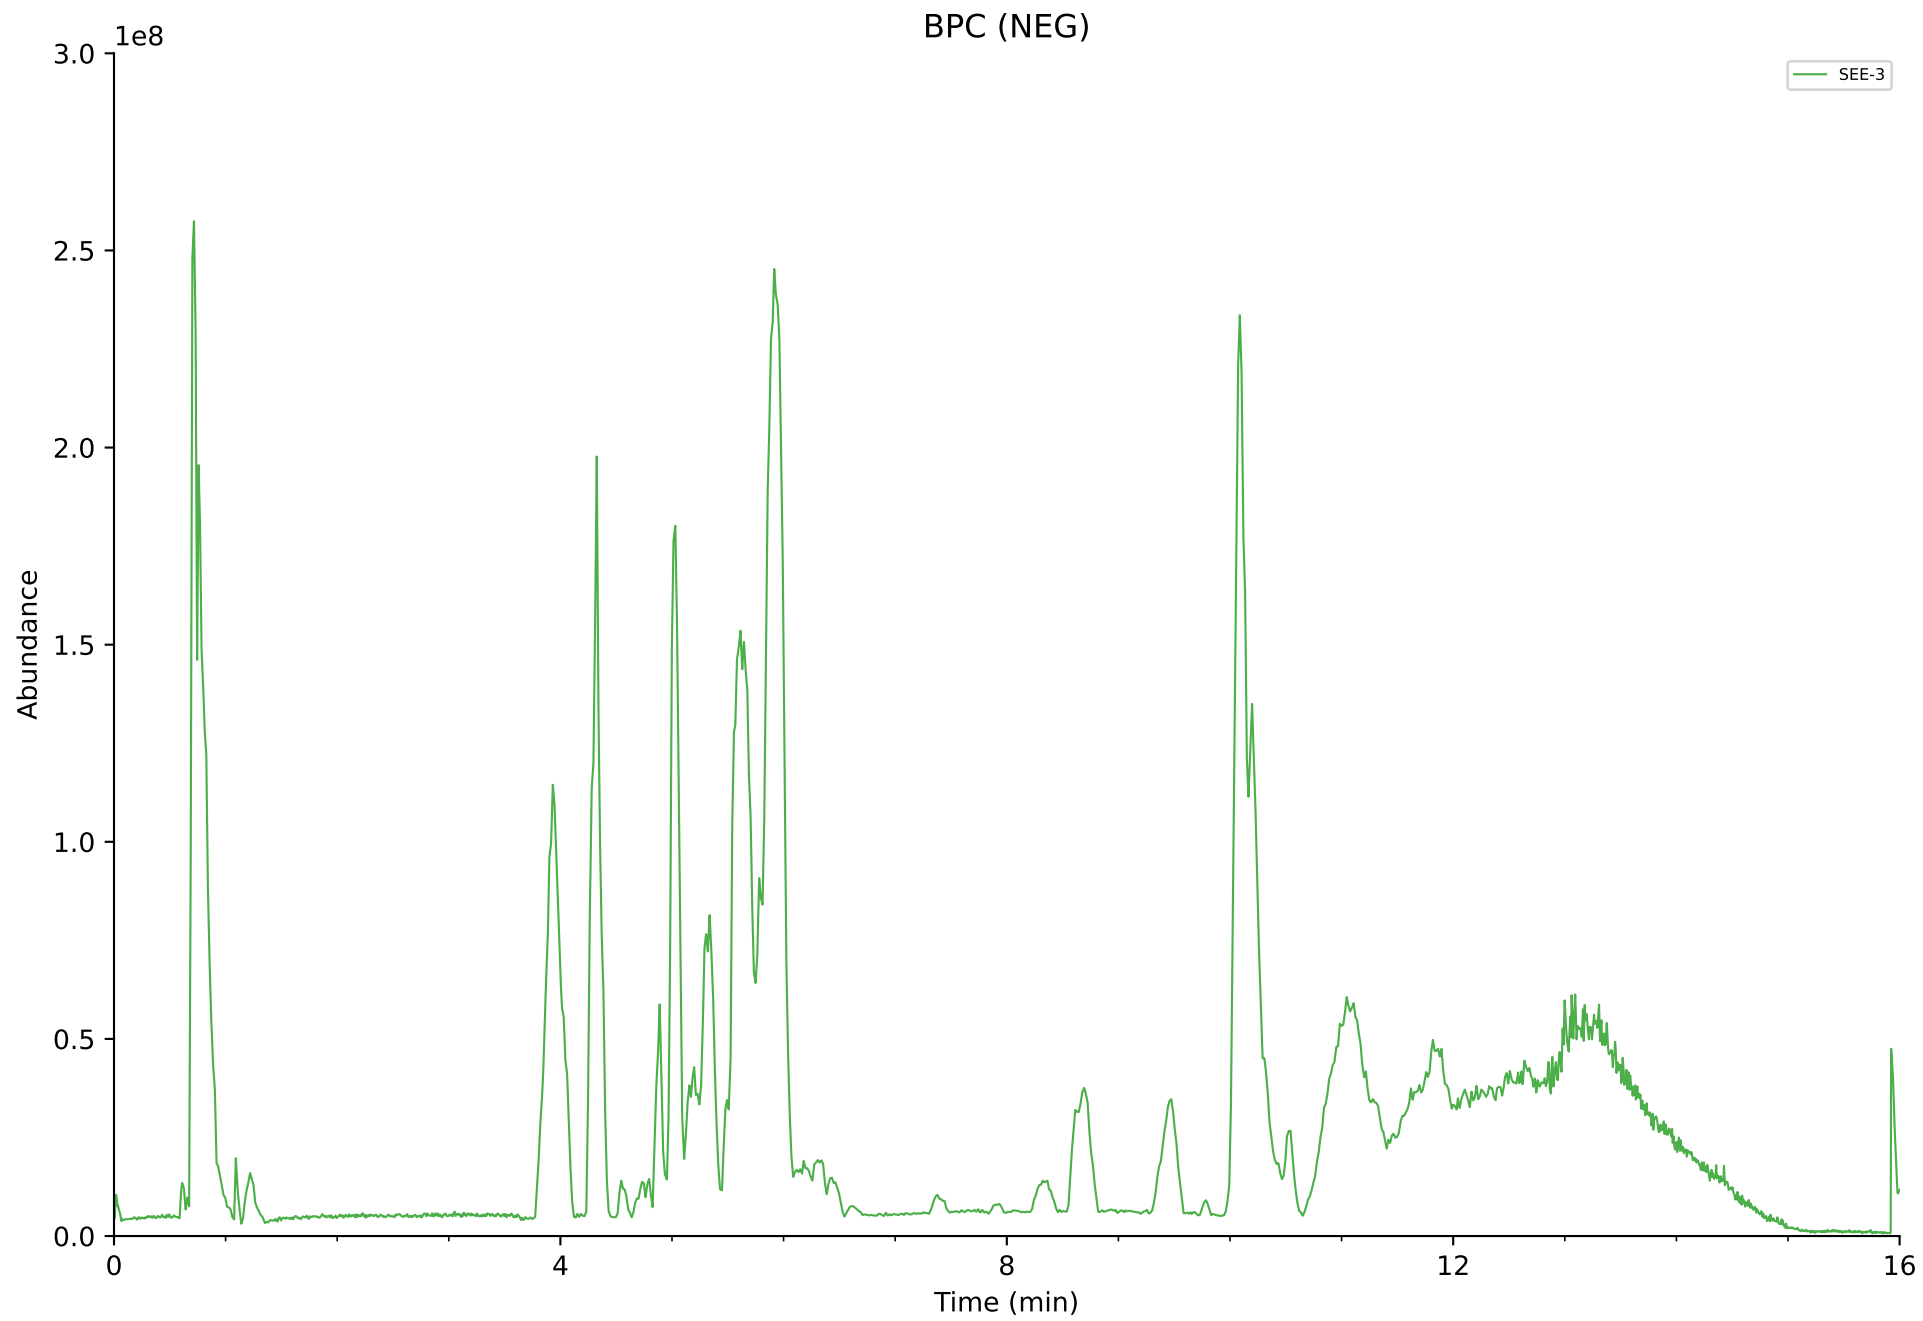

Supplement: identification_of_ingredients.zip [file BPC-NEG-SEE-3.pdf › identification of ingredients/Data analysis/2.chromatogram/BPC-NEG-SEE-3.pdf]

# BPC (NEG)

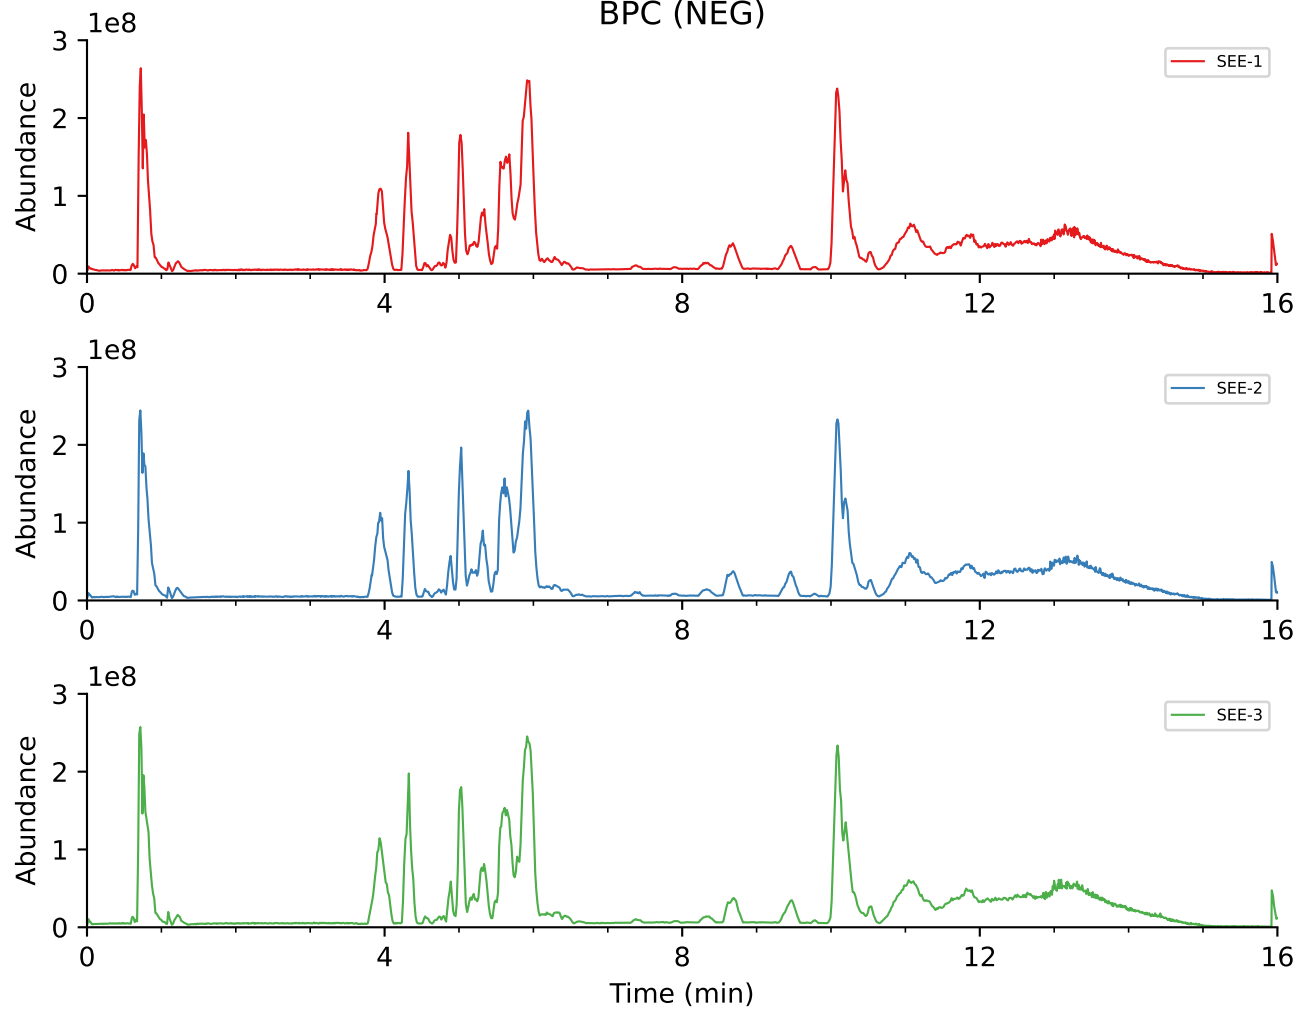

Supplement: identification_of_ingredients.zip [file BPC-NEG.pdf › identification of ingredients/Data analysis/2.chromatogram/BPC-NEG.pdf]

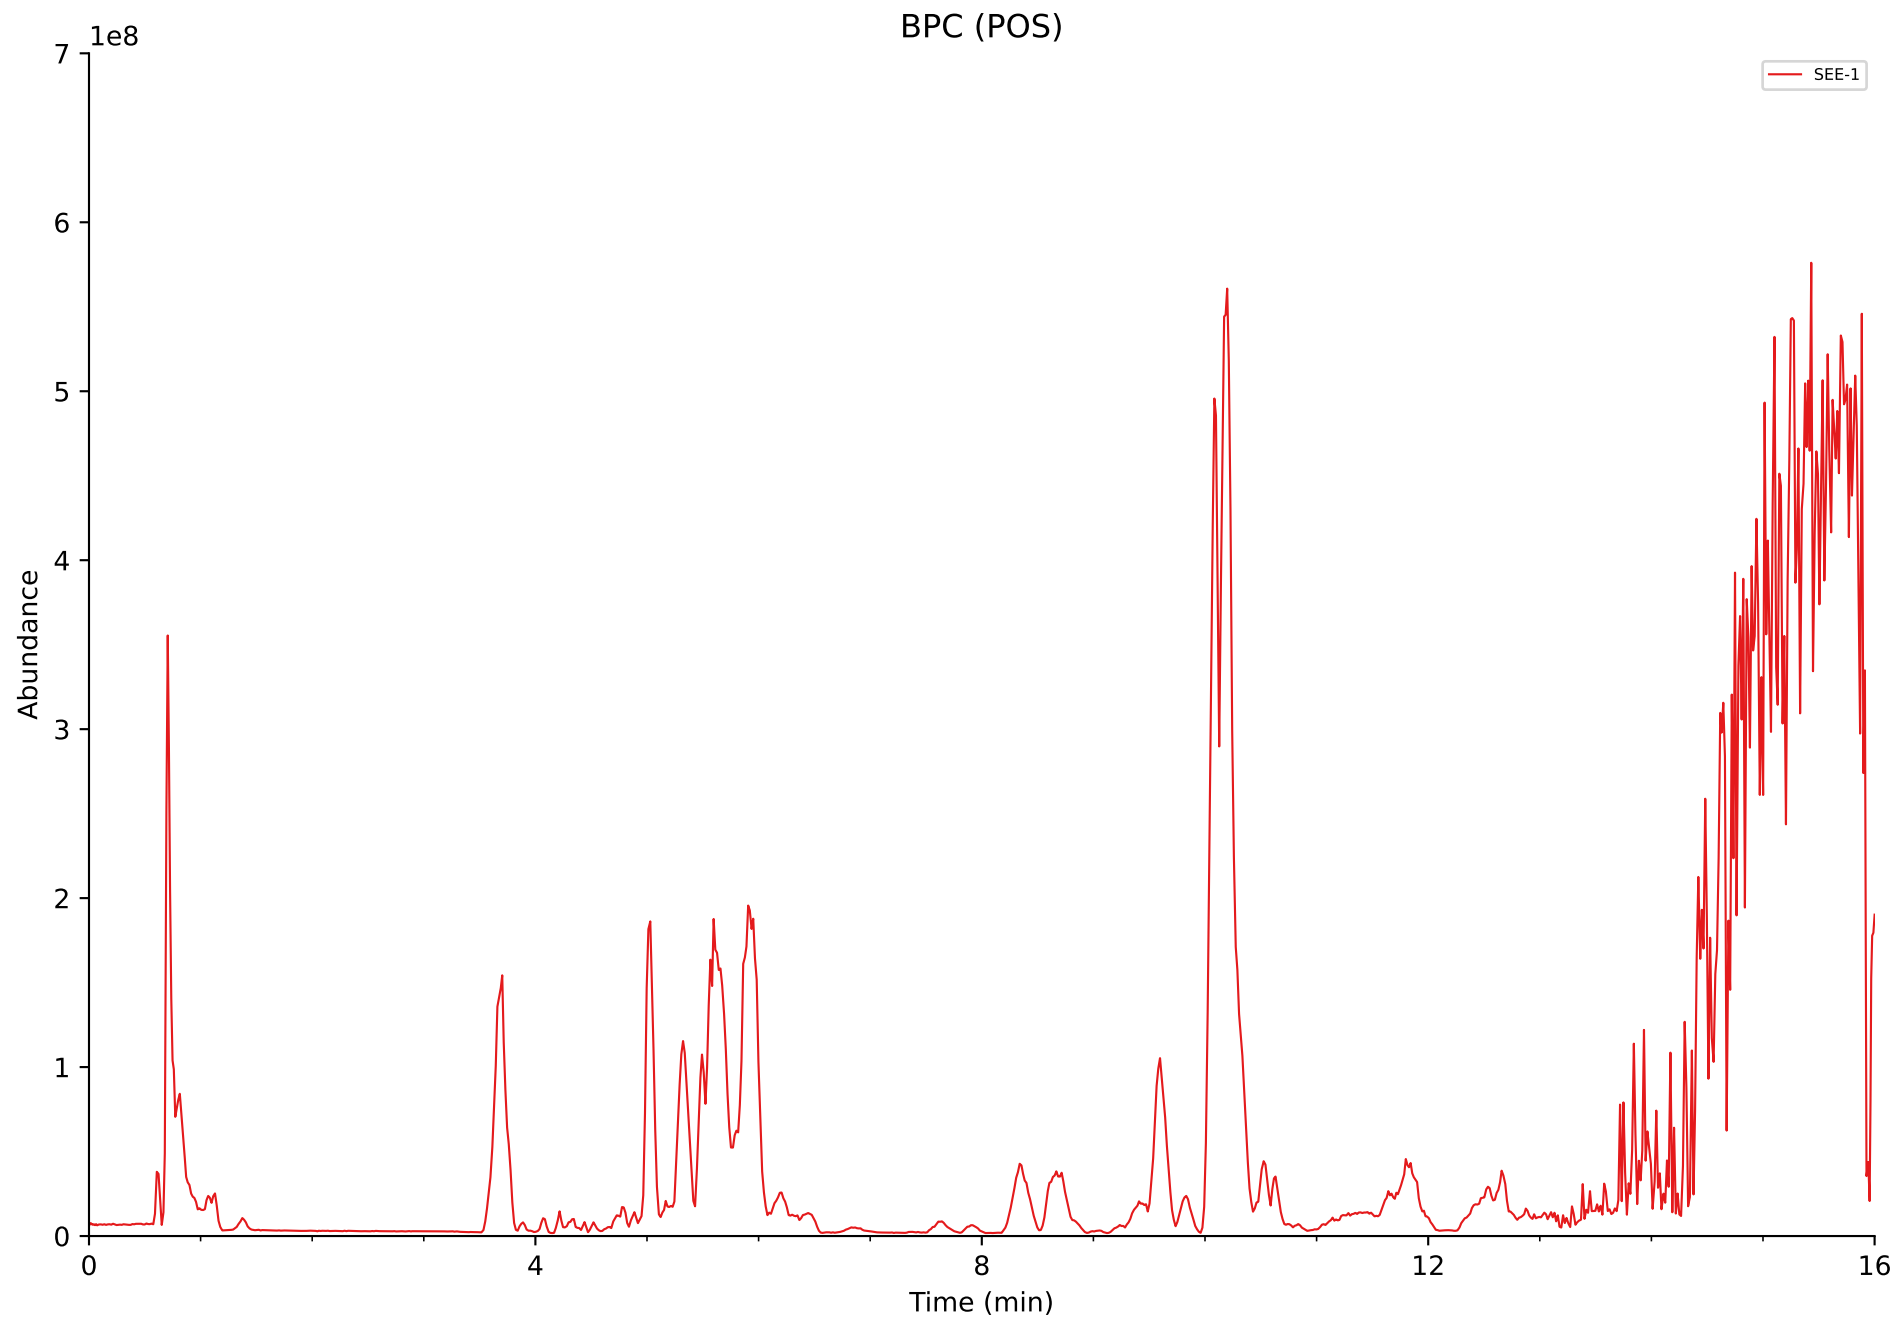

Supplement: identification_of_ingredients.zip [file BPC-POS-SEE-1.pdf › identification of ingredients/Data analysis/2.chromatogram/BPC-POS-SEE-1.pdf]

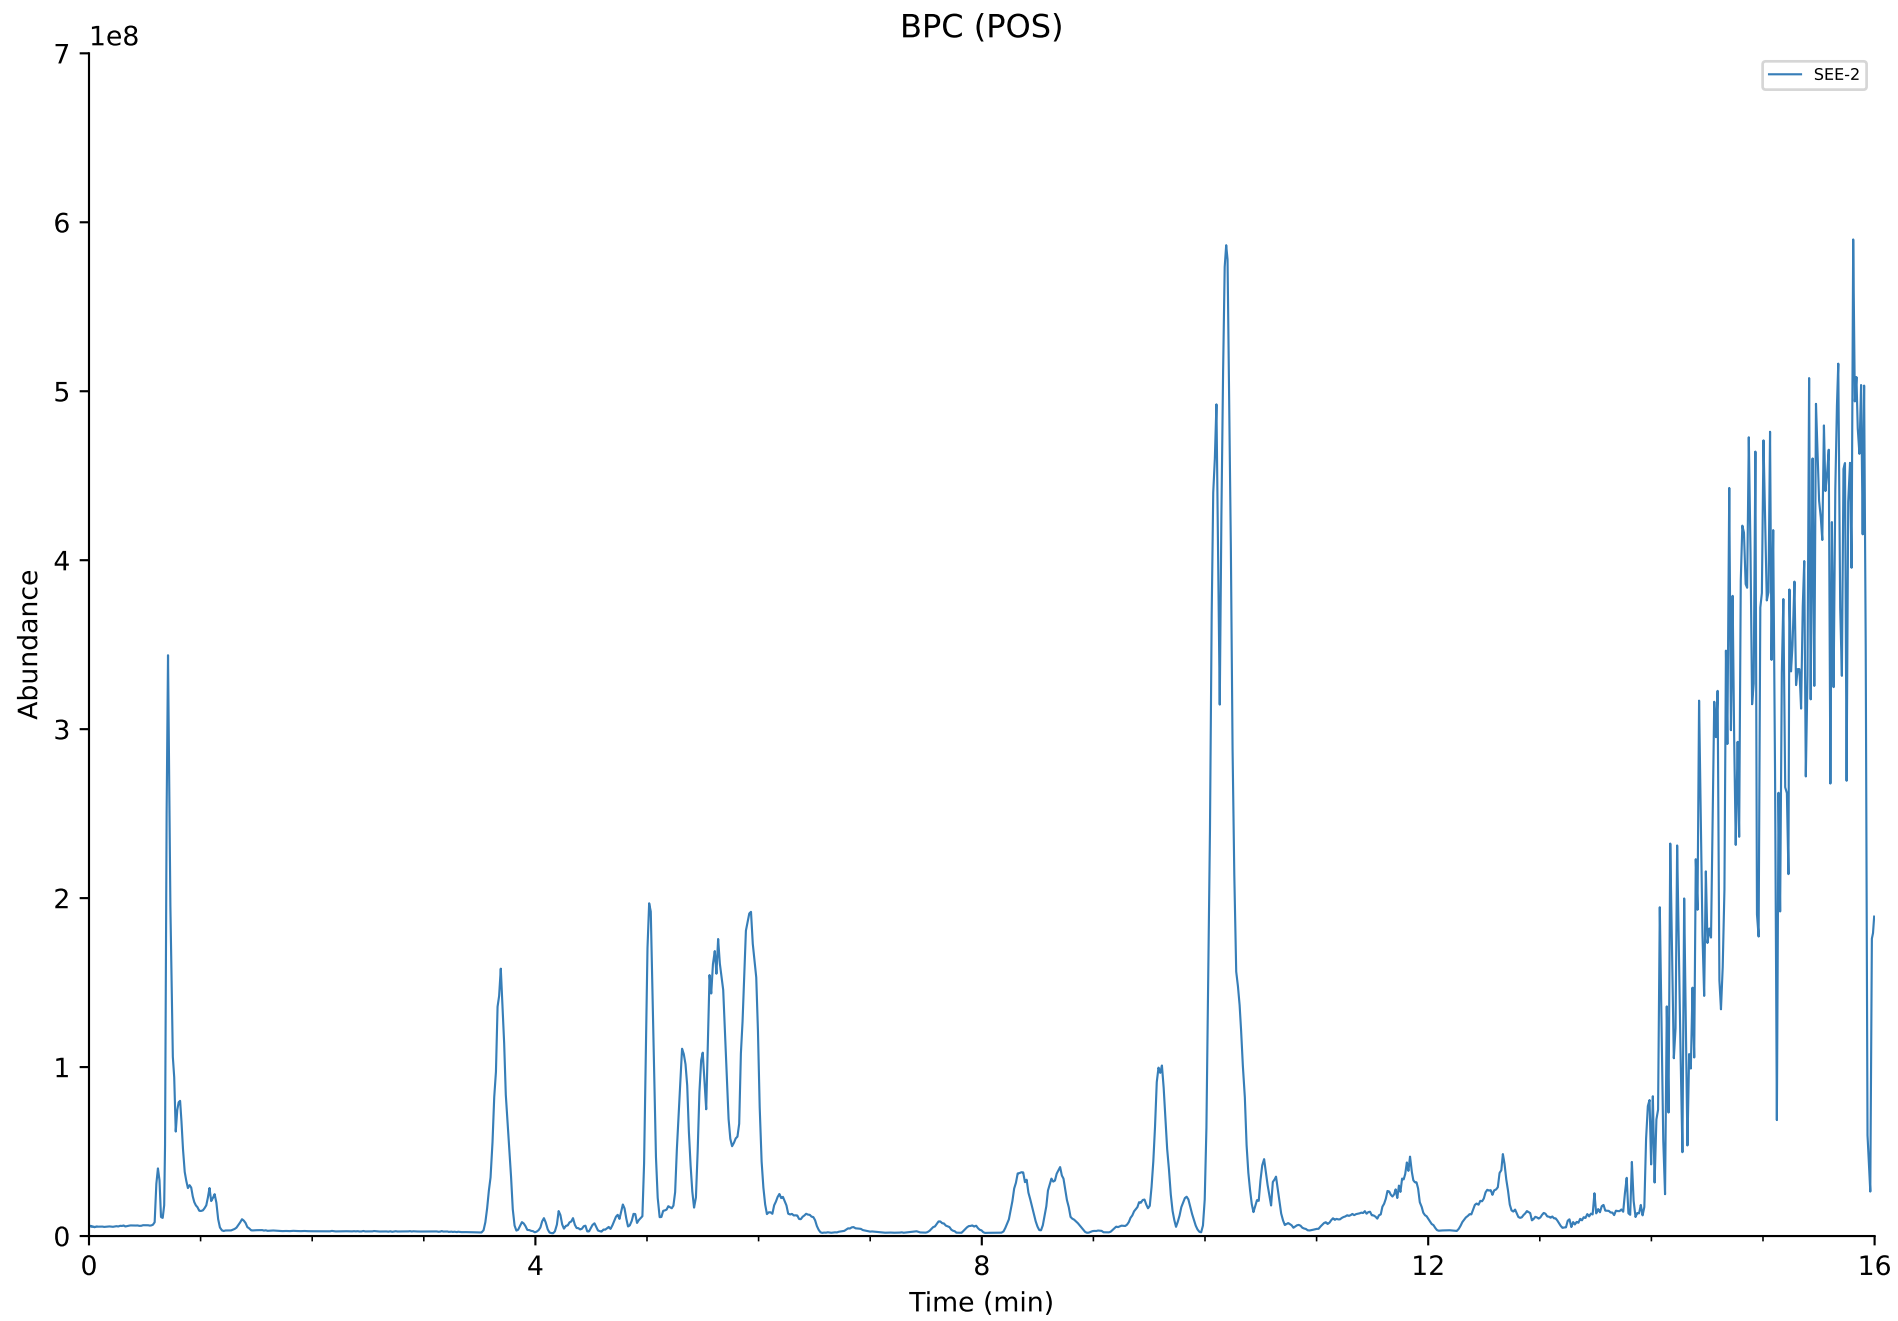

Supplement: identification_of_ingredients.zip [file BPC-POS-SEE-2.pdf › identification of ingredients/Data analysis/2.chromatogram/BPC-POS-SEE-2.pdf]

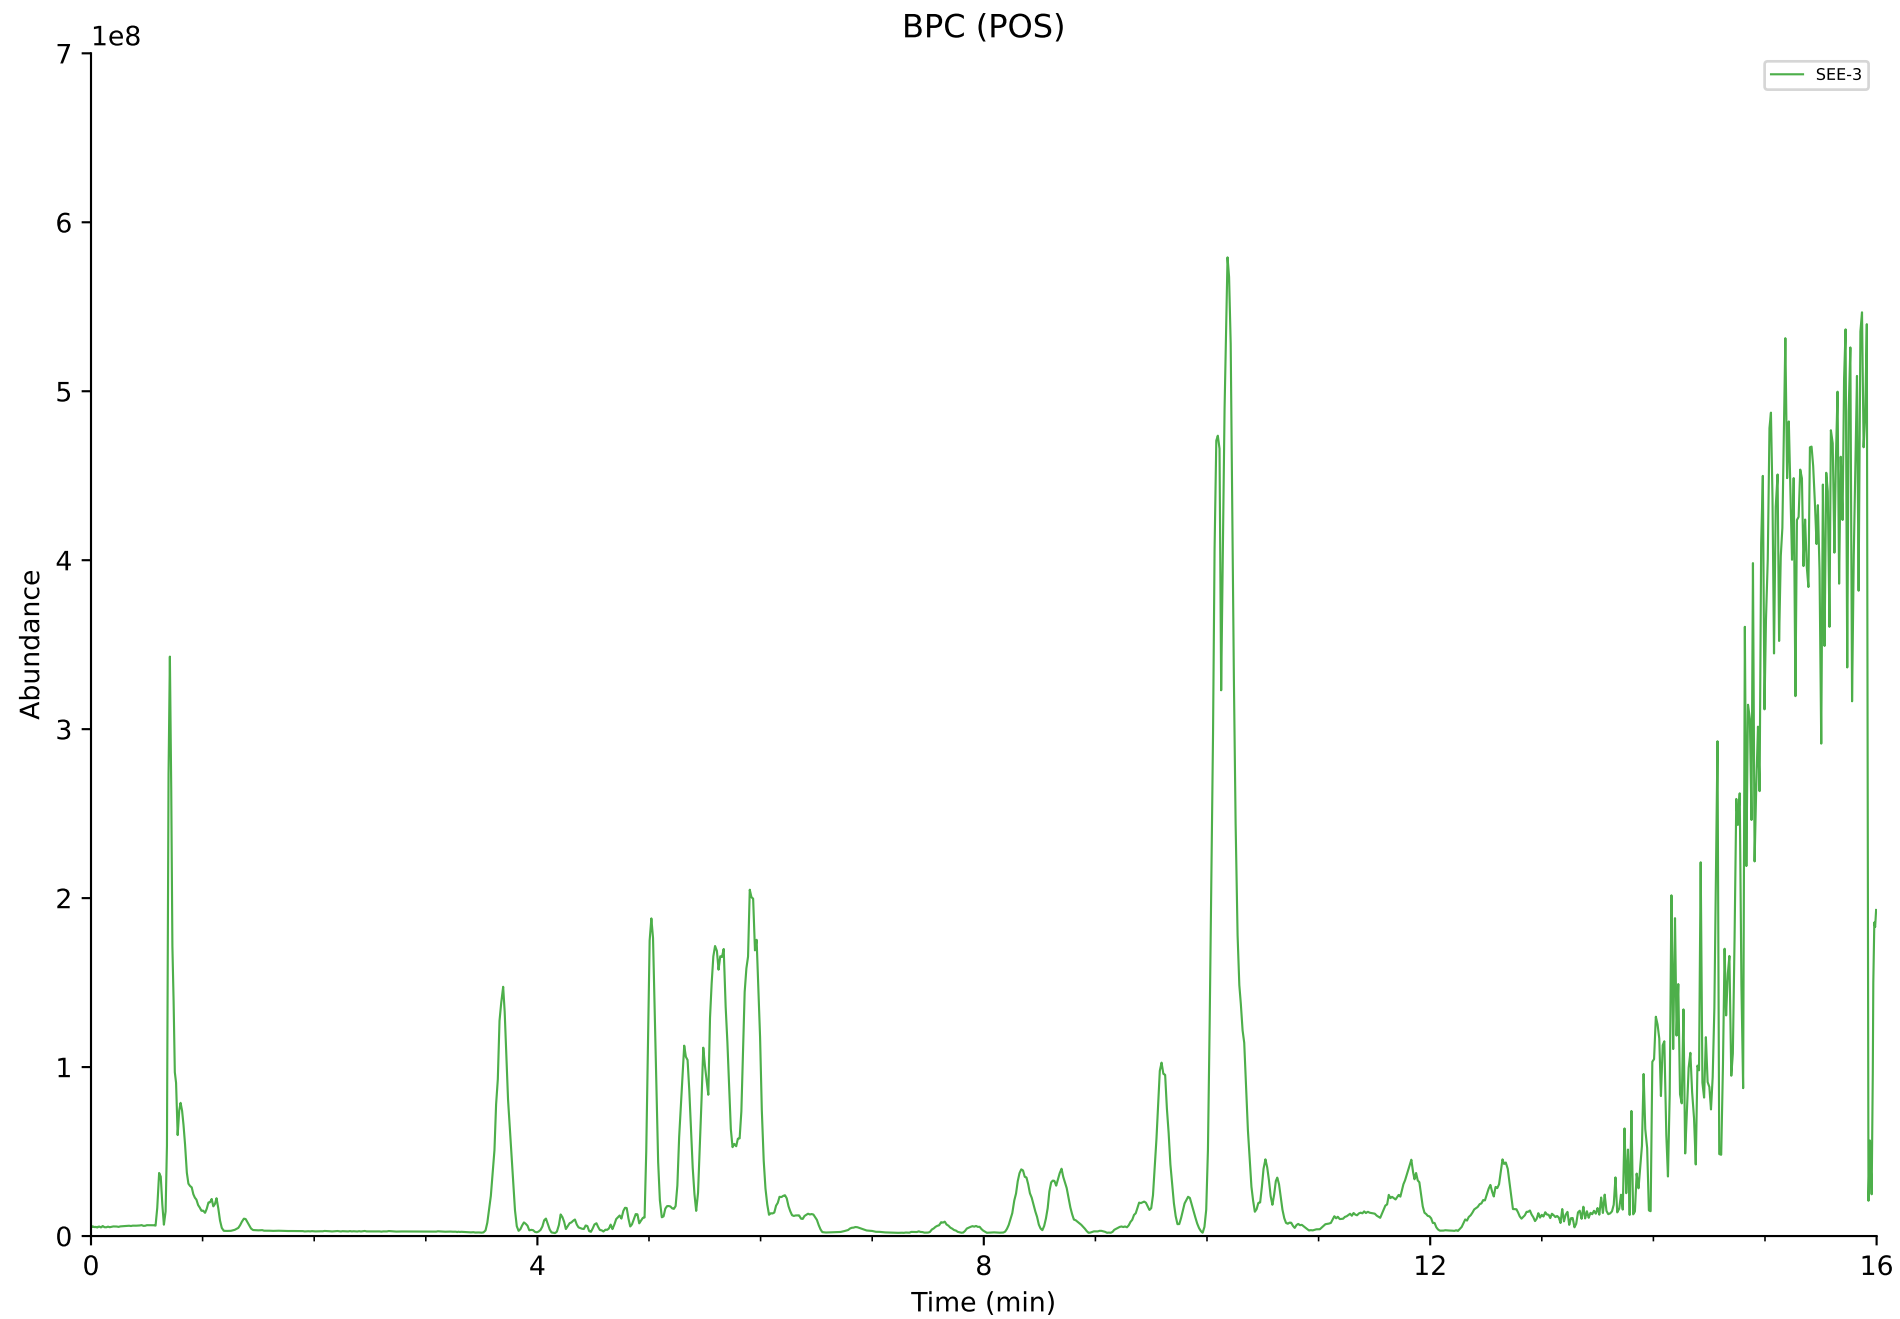

Supplement: identification_of_ingredients.zip [file BPC-POS-SEE-3.pdf › identification of ingredients/Data analysis/2.chromatogram/BPC-POS-SEE-3.pdf]

# BPC (POS)

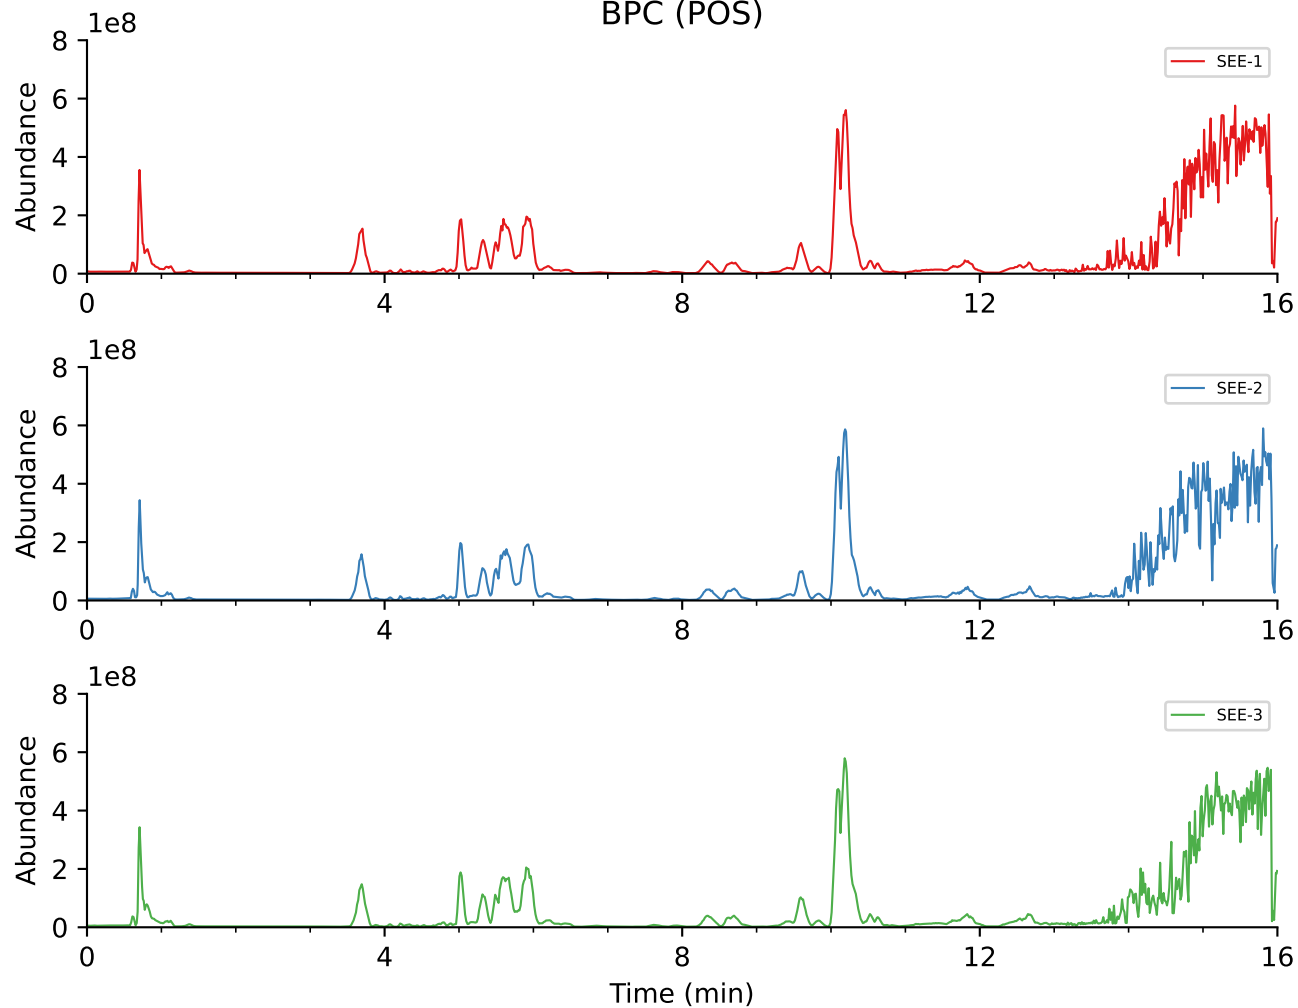

Supplement: identification_of_ingredients.zip [file BPC-POS.pdf › identification of ingredients/Data analysis/2.chromatogram/BPC-POS.pdf]

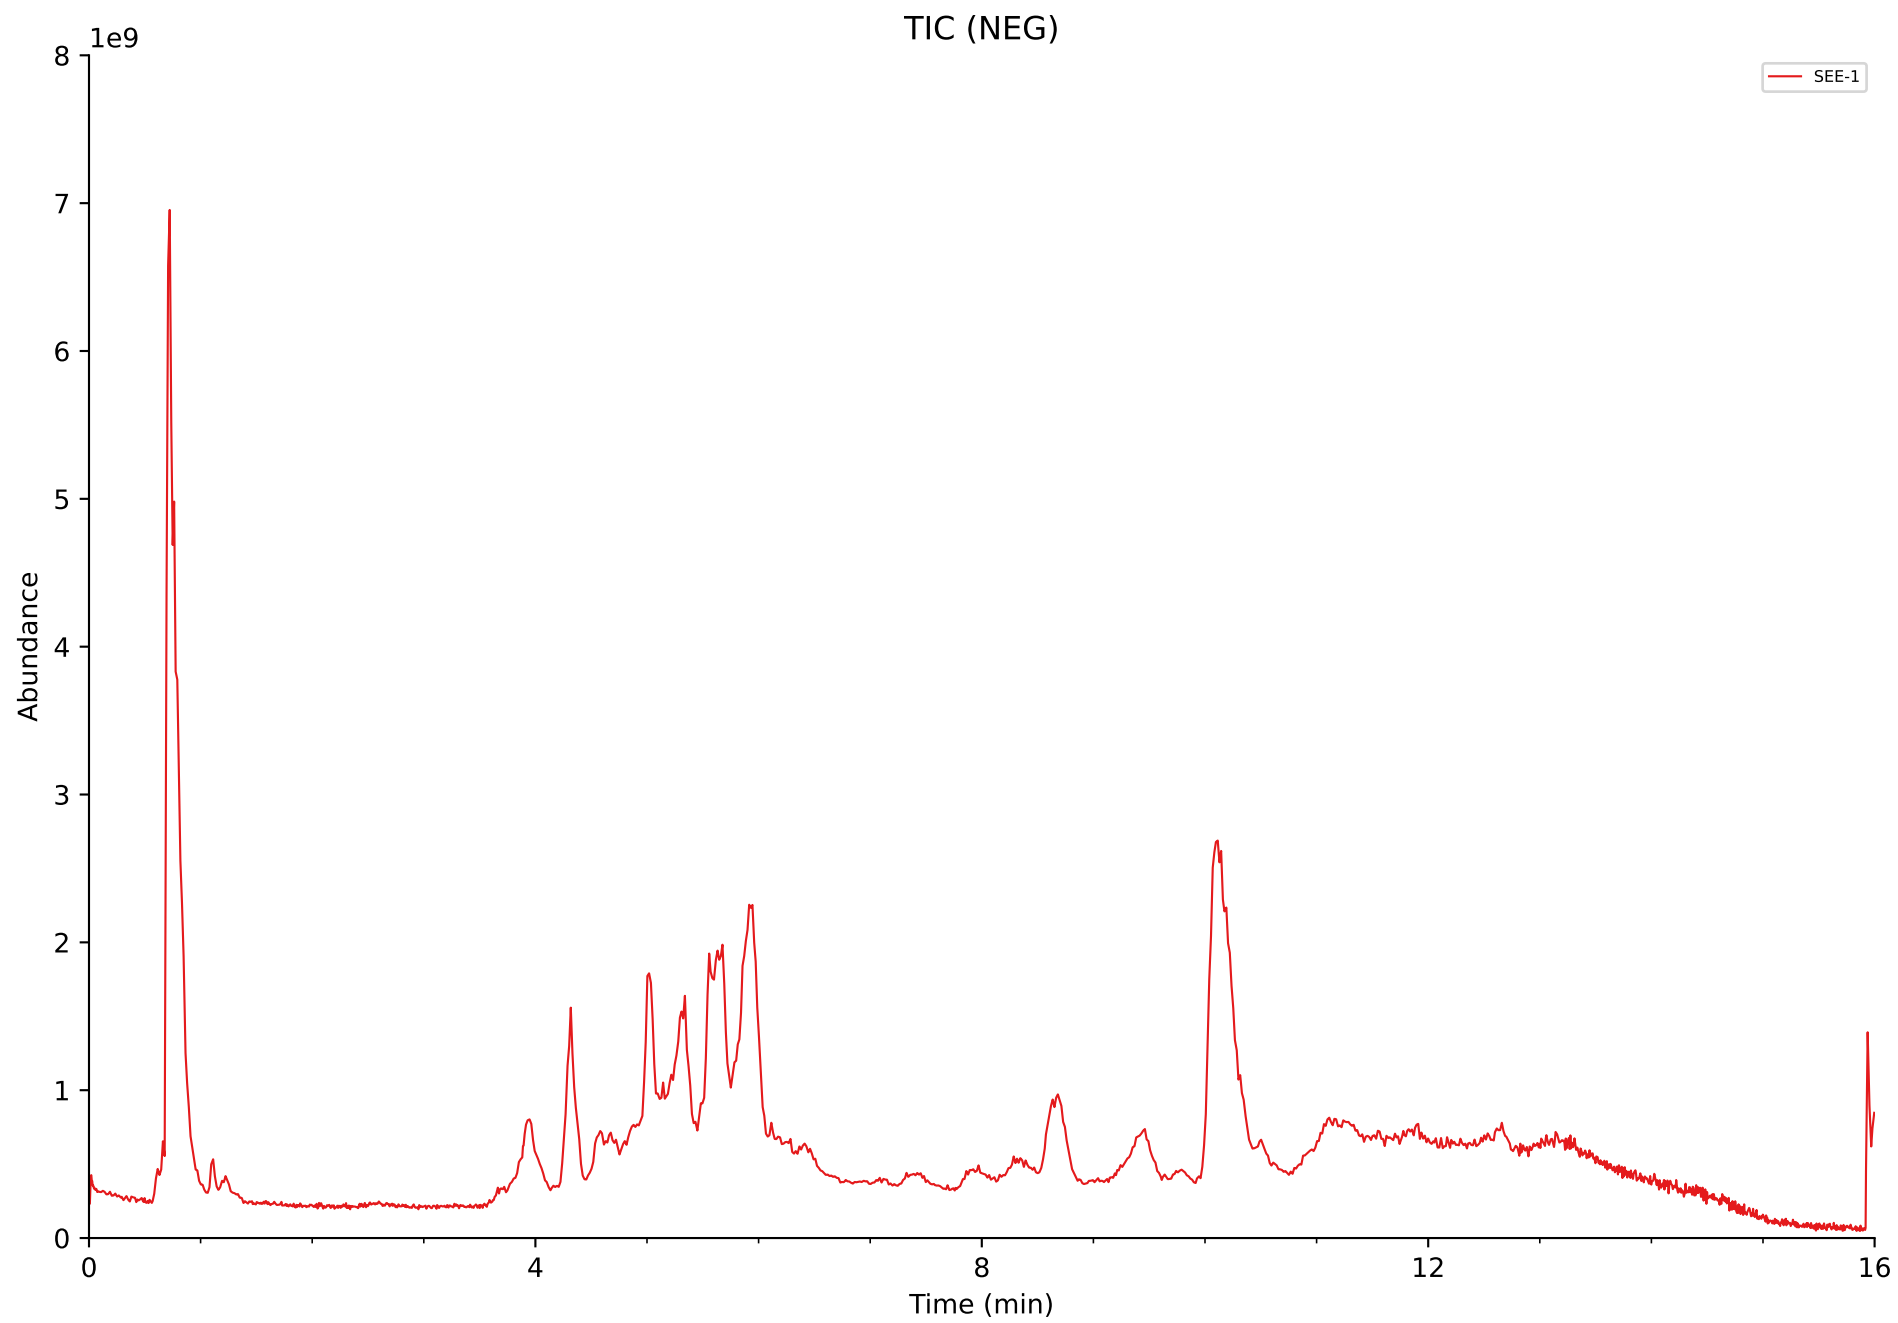

Supplement: identification_of_ingredients.zip [file TIC-NEG-SEE-1.pdf › identification of ingredients/Data analysis/2.chromatogram/TIC-NEG-SEE-1.pdf]

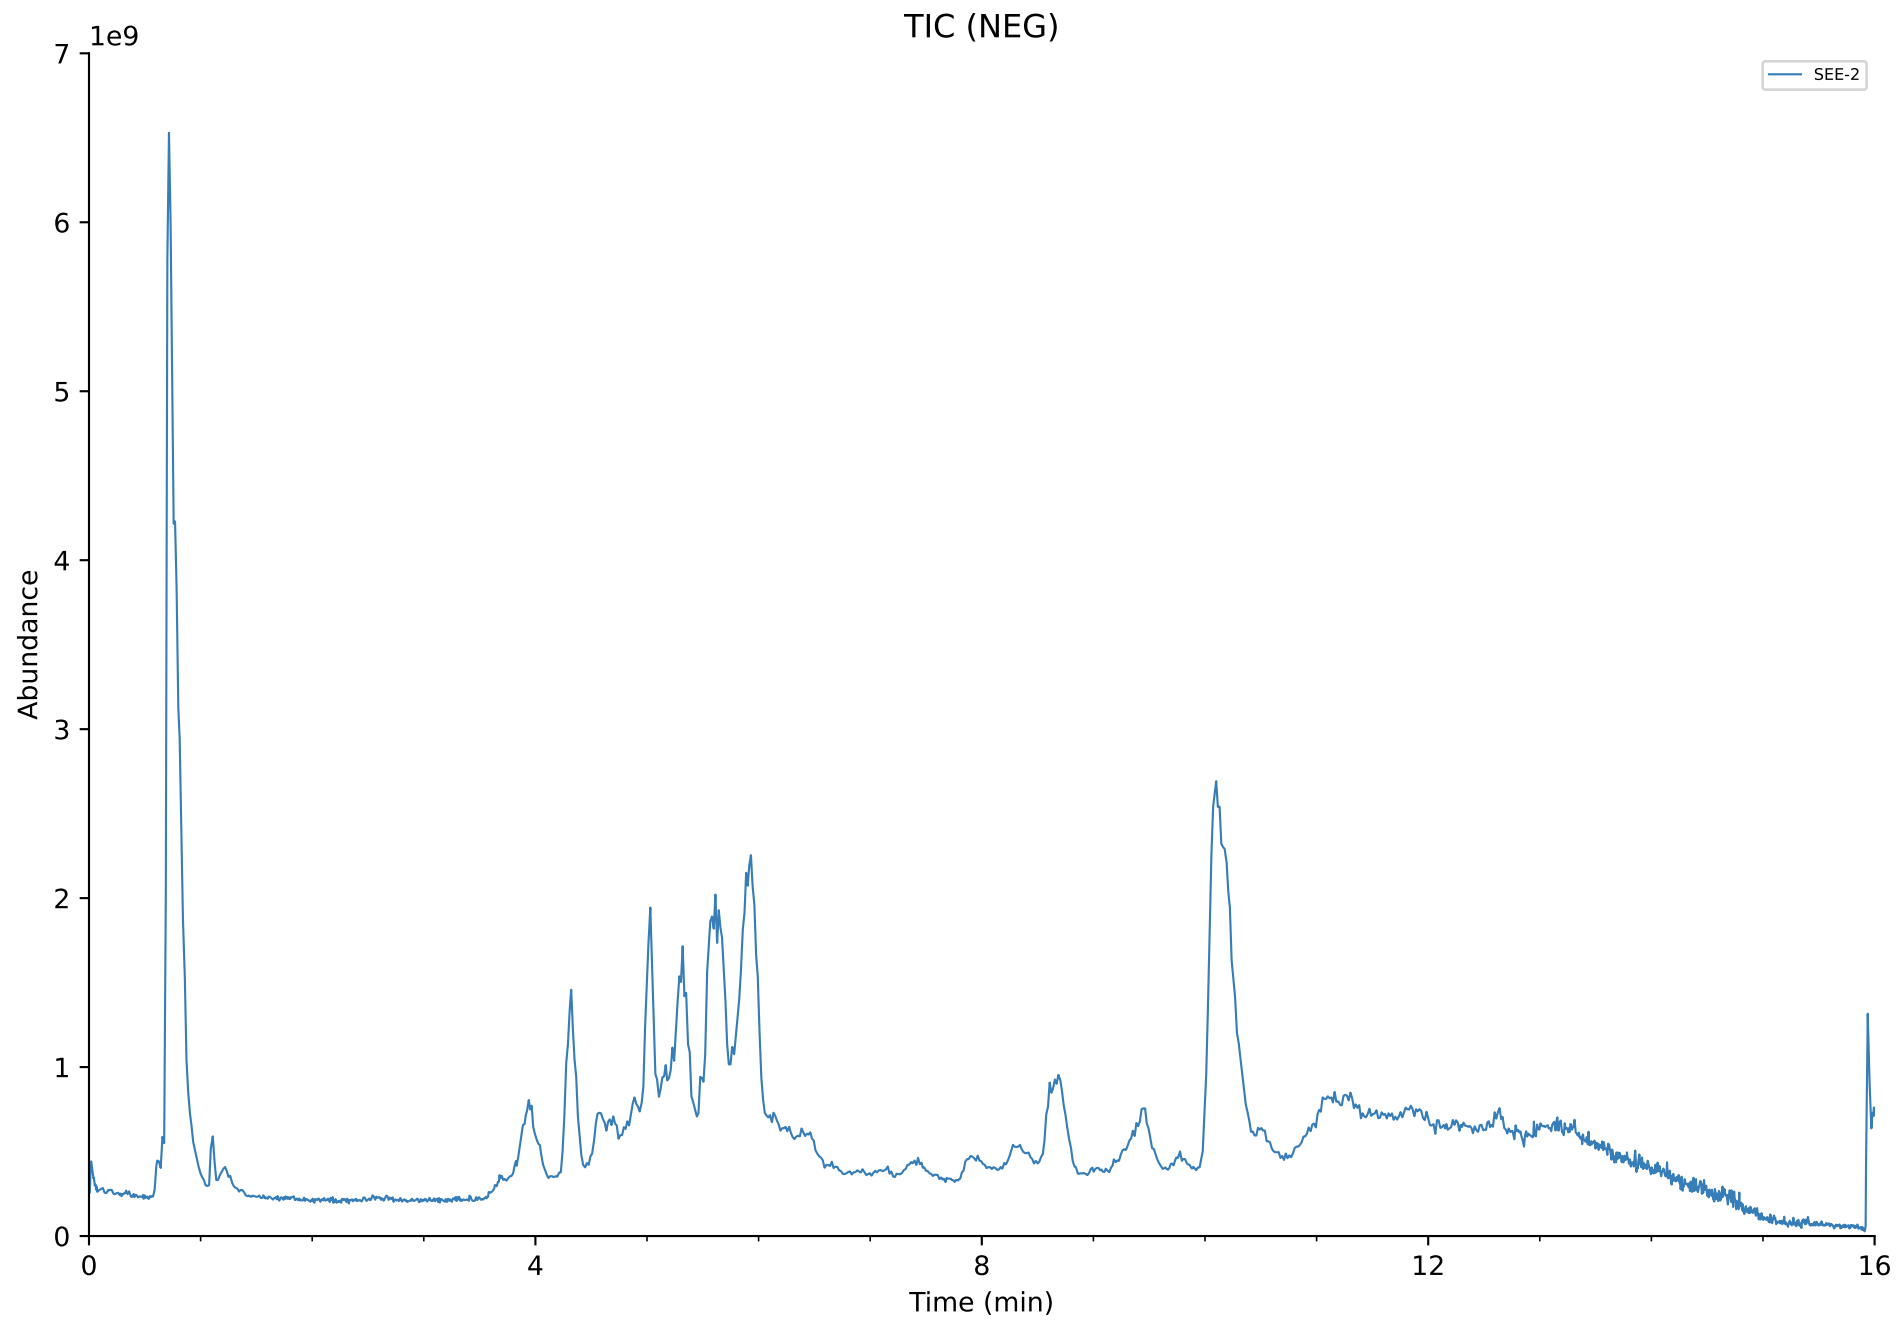

Supplement: identification_of_ingredients.zip [file TIC-NEG-SEE-2.pdf › identification of ingredients/Data analysis/2.chromatogram/TIC-NEG-SEE-2.pdf]

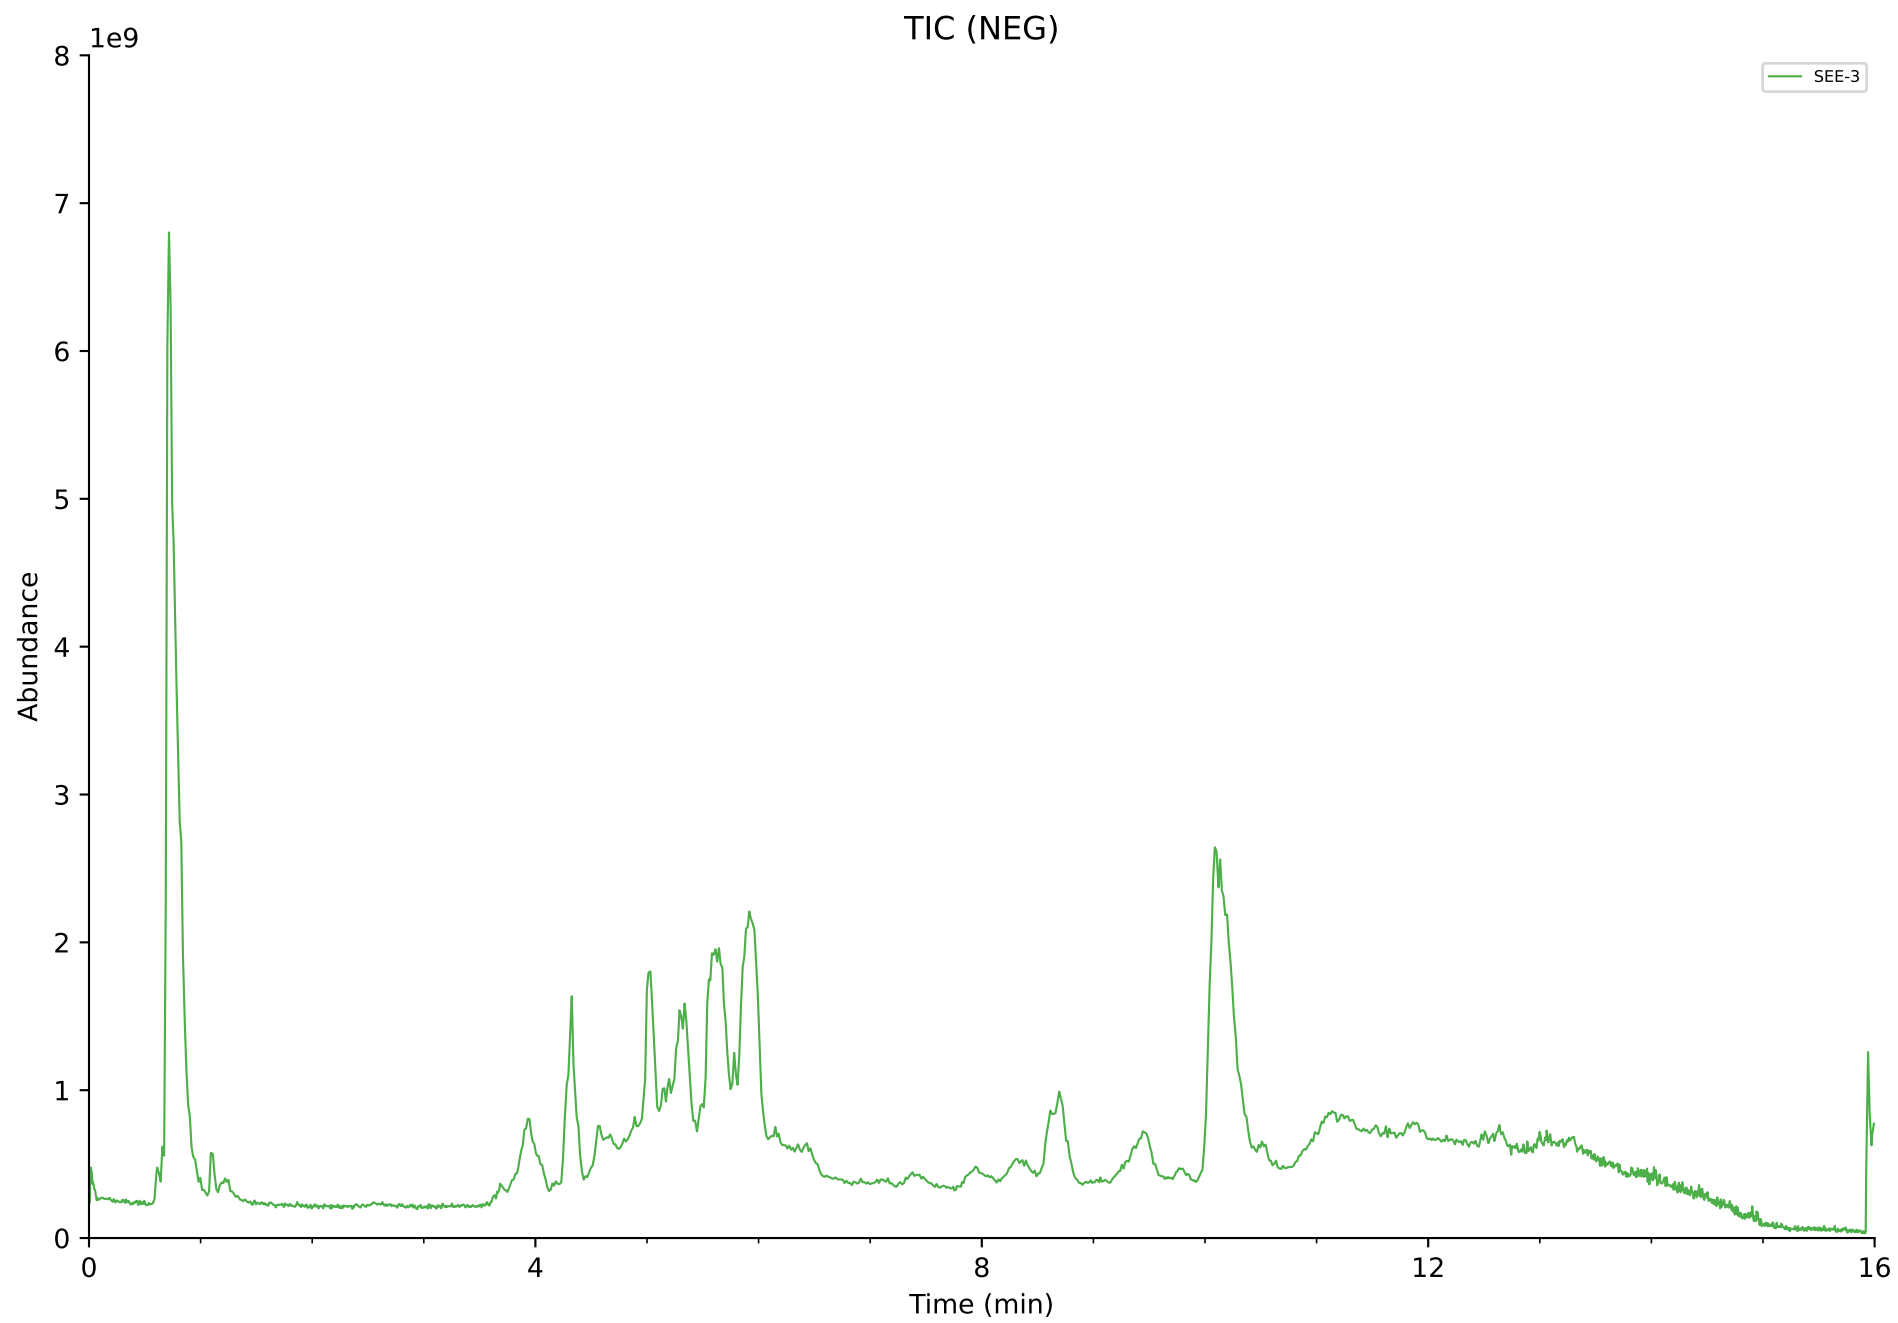

Supplement: identification_of_ingredients.zip [file TIC-NEG-SEE-3.pdf › identification of ingredients/Data analysis/2.chromatogram/TIC-NEG-SEE-3.pdf]

# TIC (NEG)

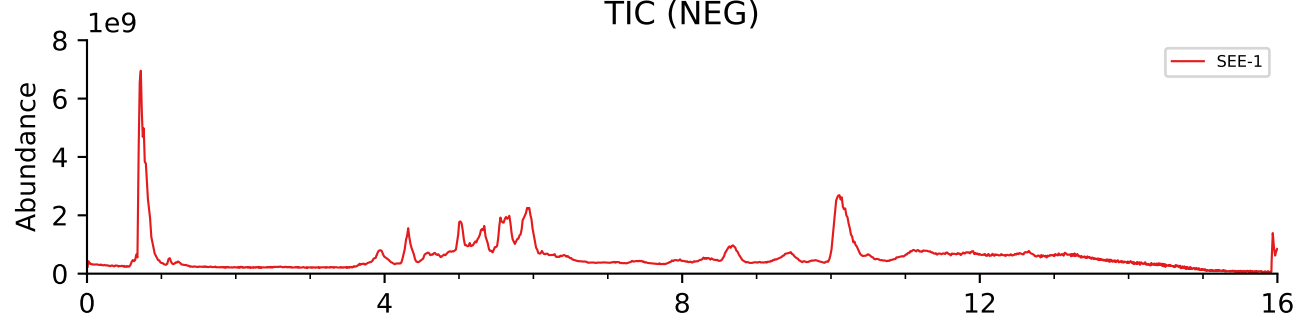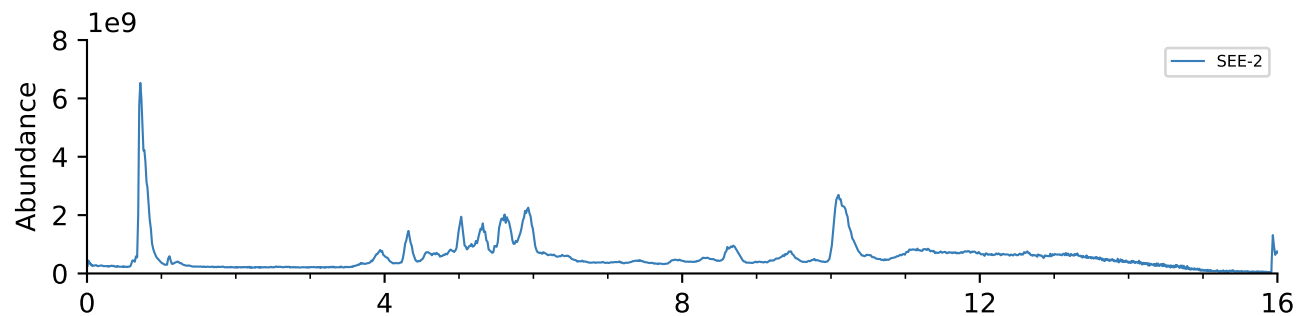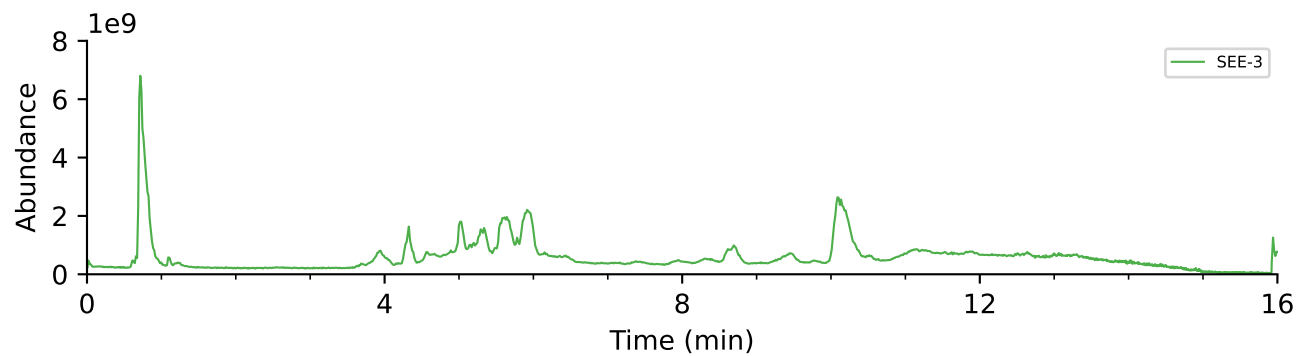

Supplement: identification_of_ingredients.zip [file TIC-NEG.pdf › identification of ingredients/Data analysis/2.chromatogram/TIC-NEG.pdf]

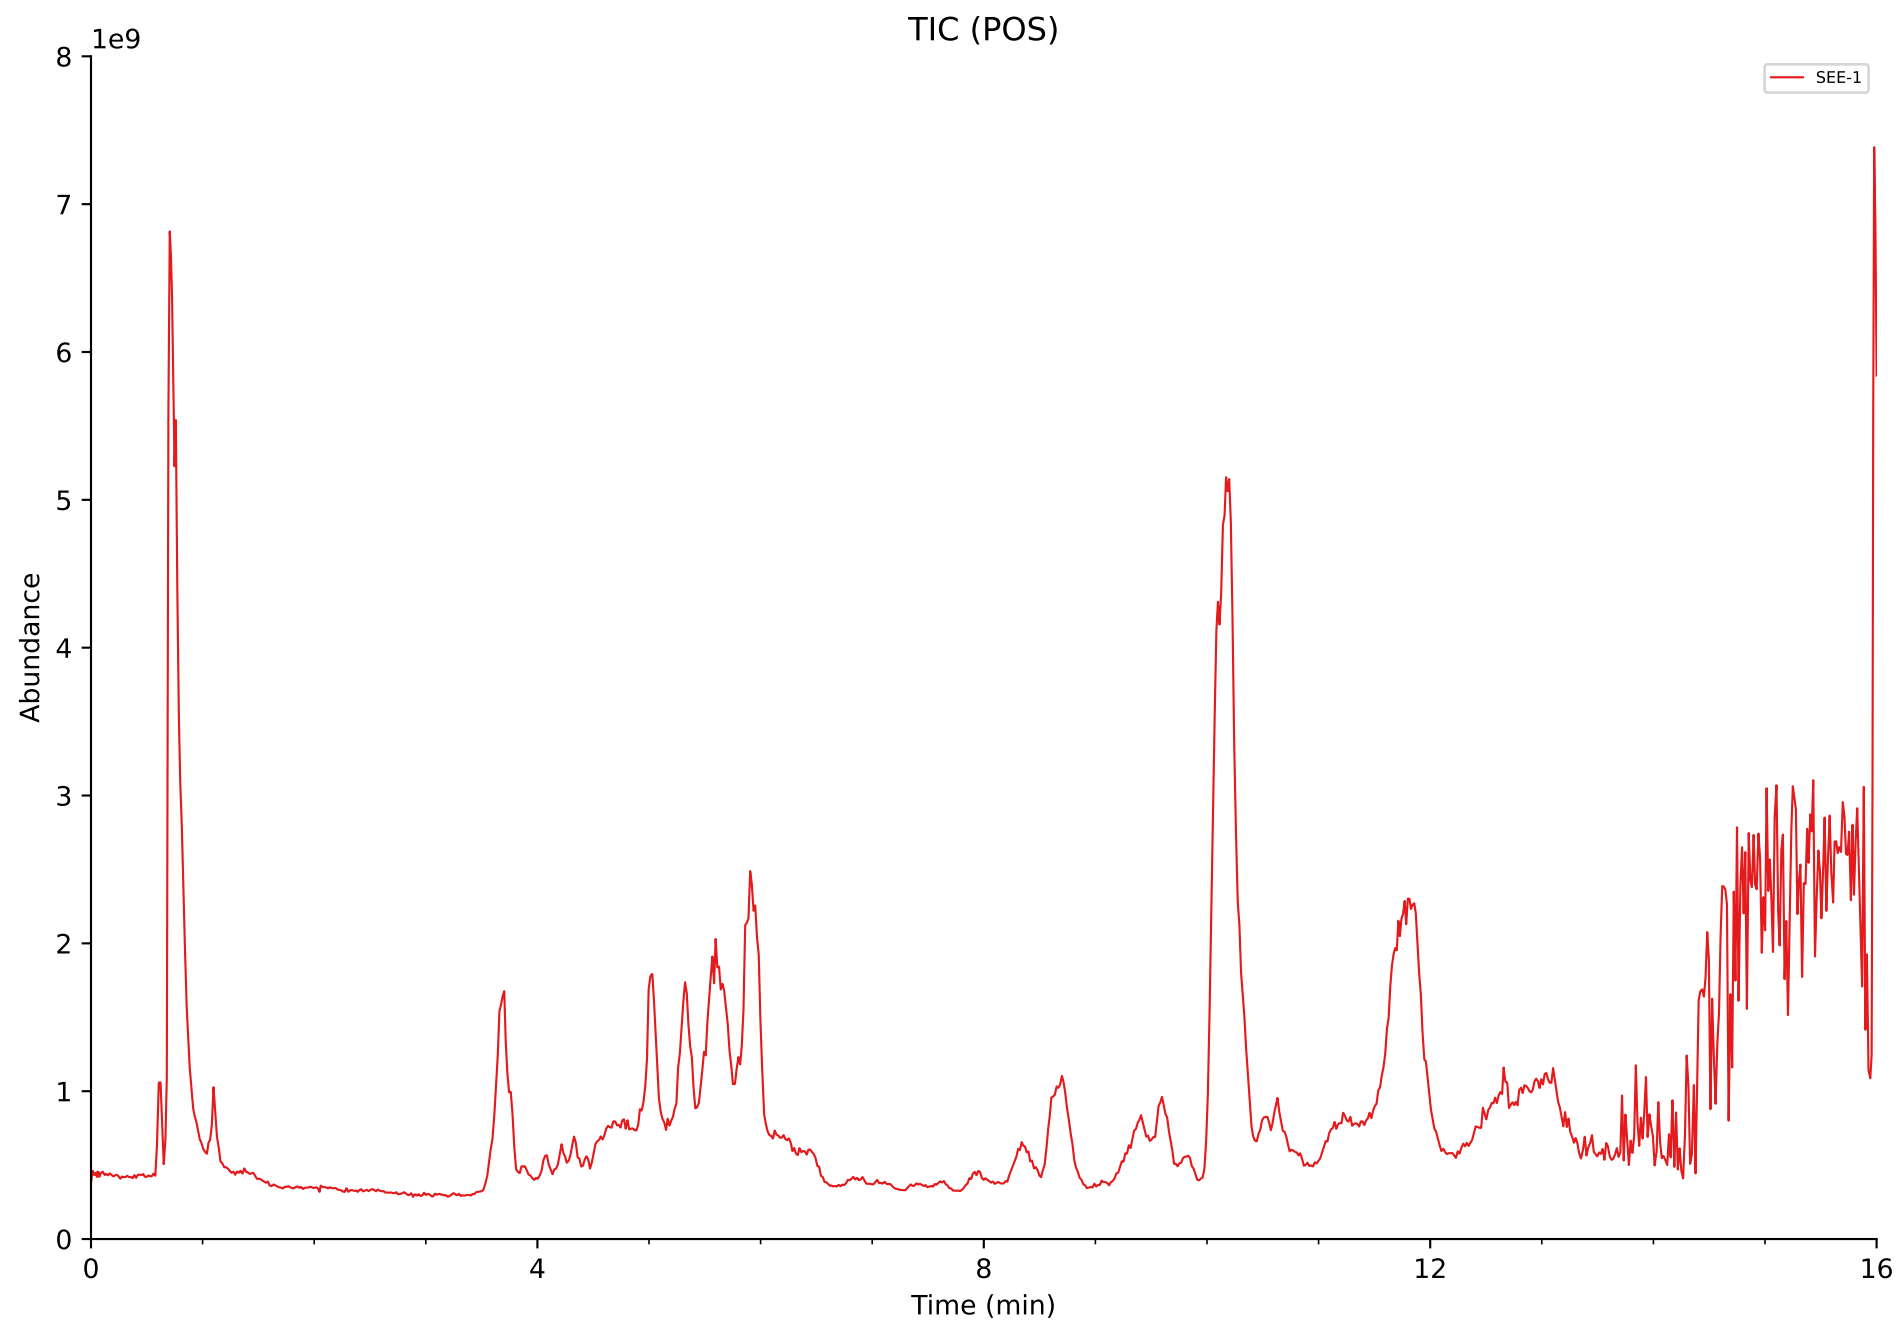

Supplement: identification_of_ingredients.zip [file TIC-POS-SEE-1.pdf › identification of ingredients/Data analysis/2.chromatogram/TIC-POS-SEE-1.pdf]

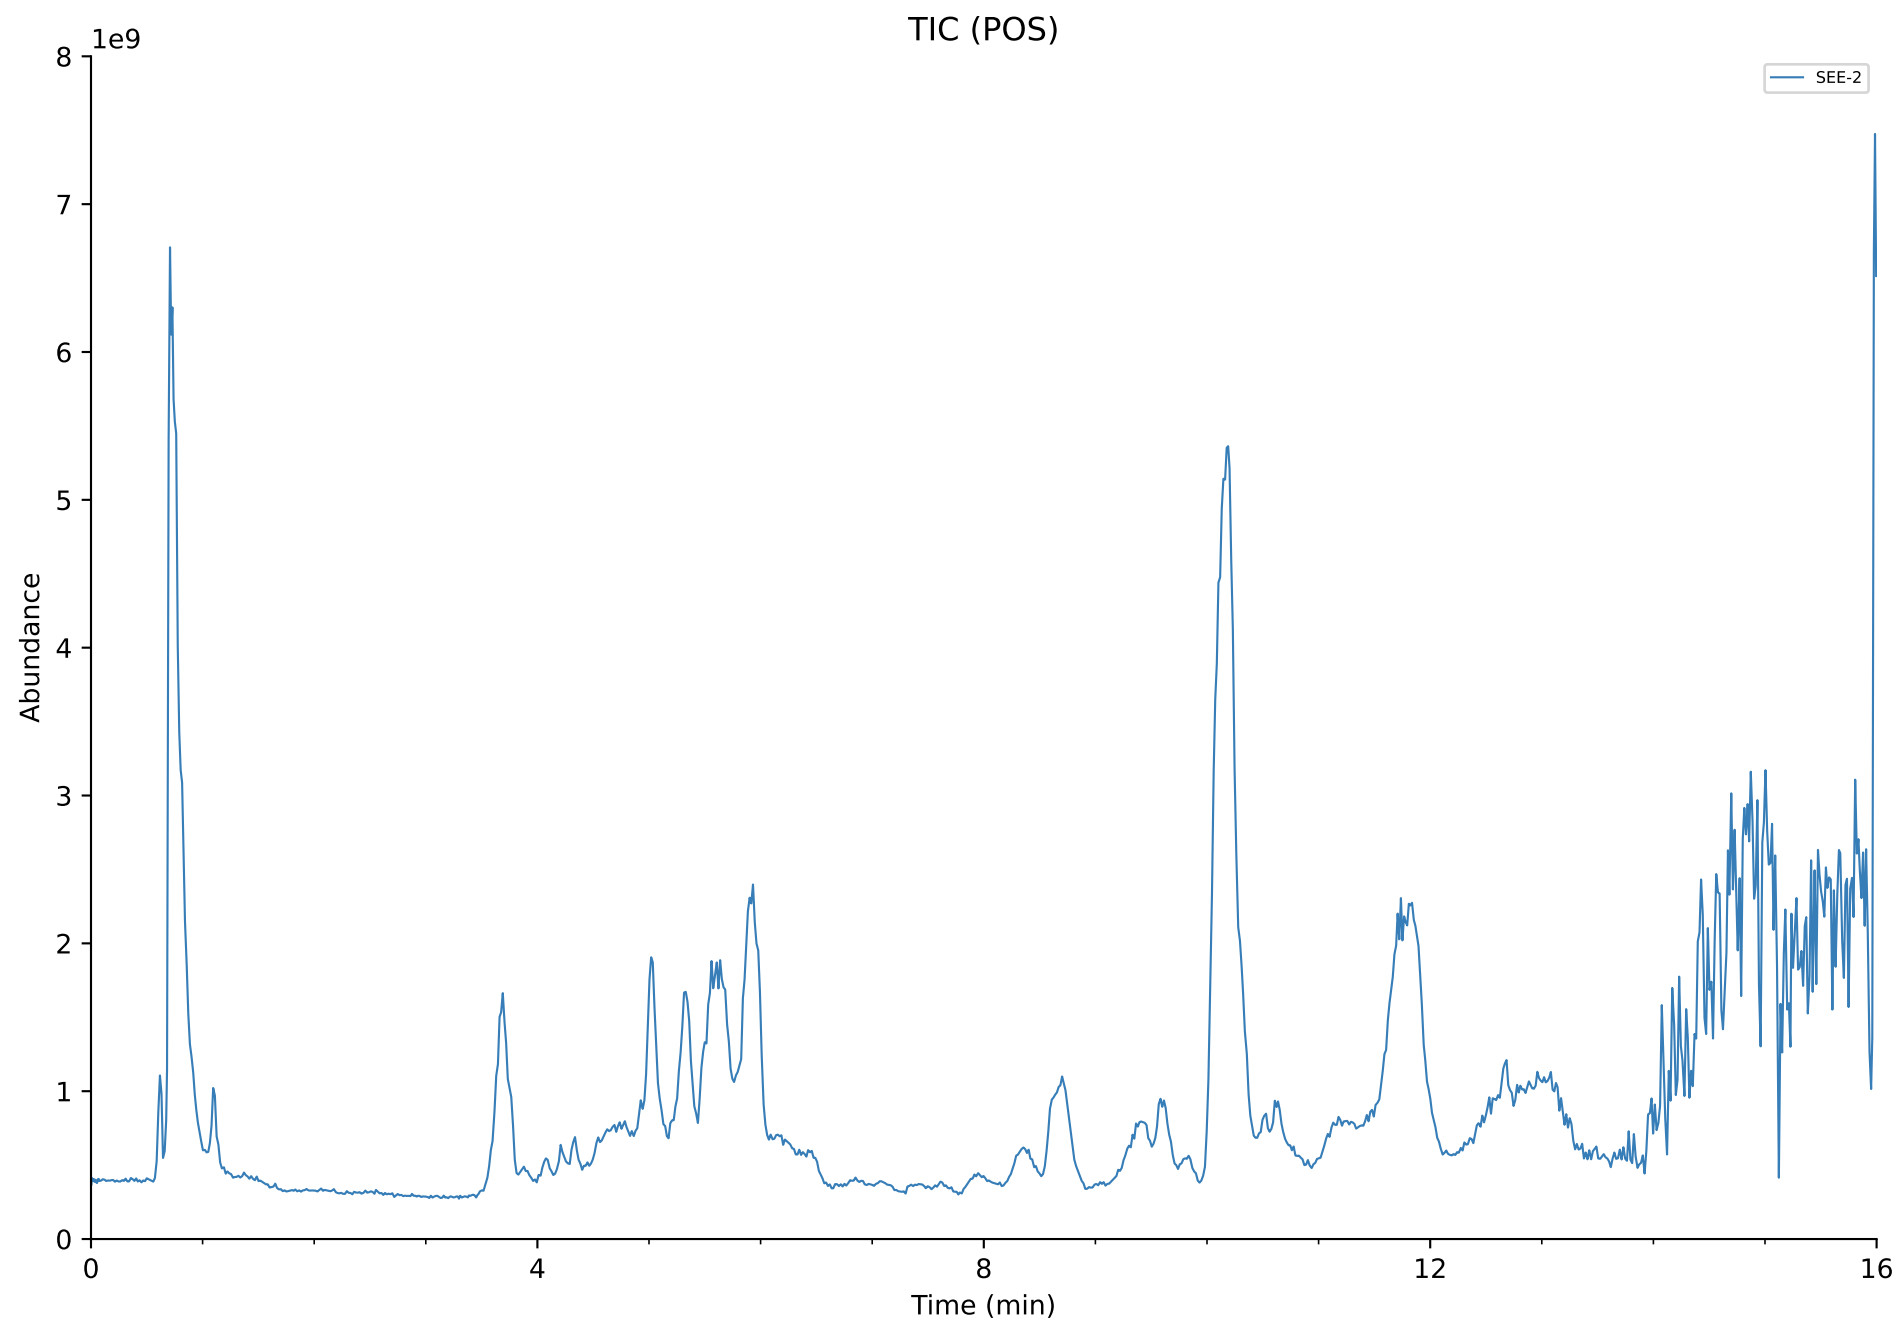

Supplement: identification_of_ingredients.zip [file TIC-POS-SEE-2.pdf › identification of ingredients/Data analysis/2.chromatogram/TIC-POS-SEE-2.pdf]

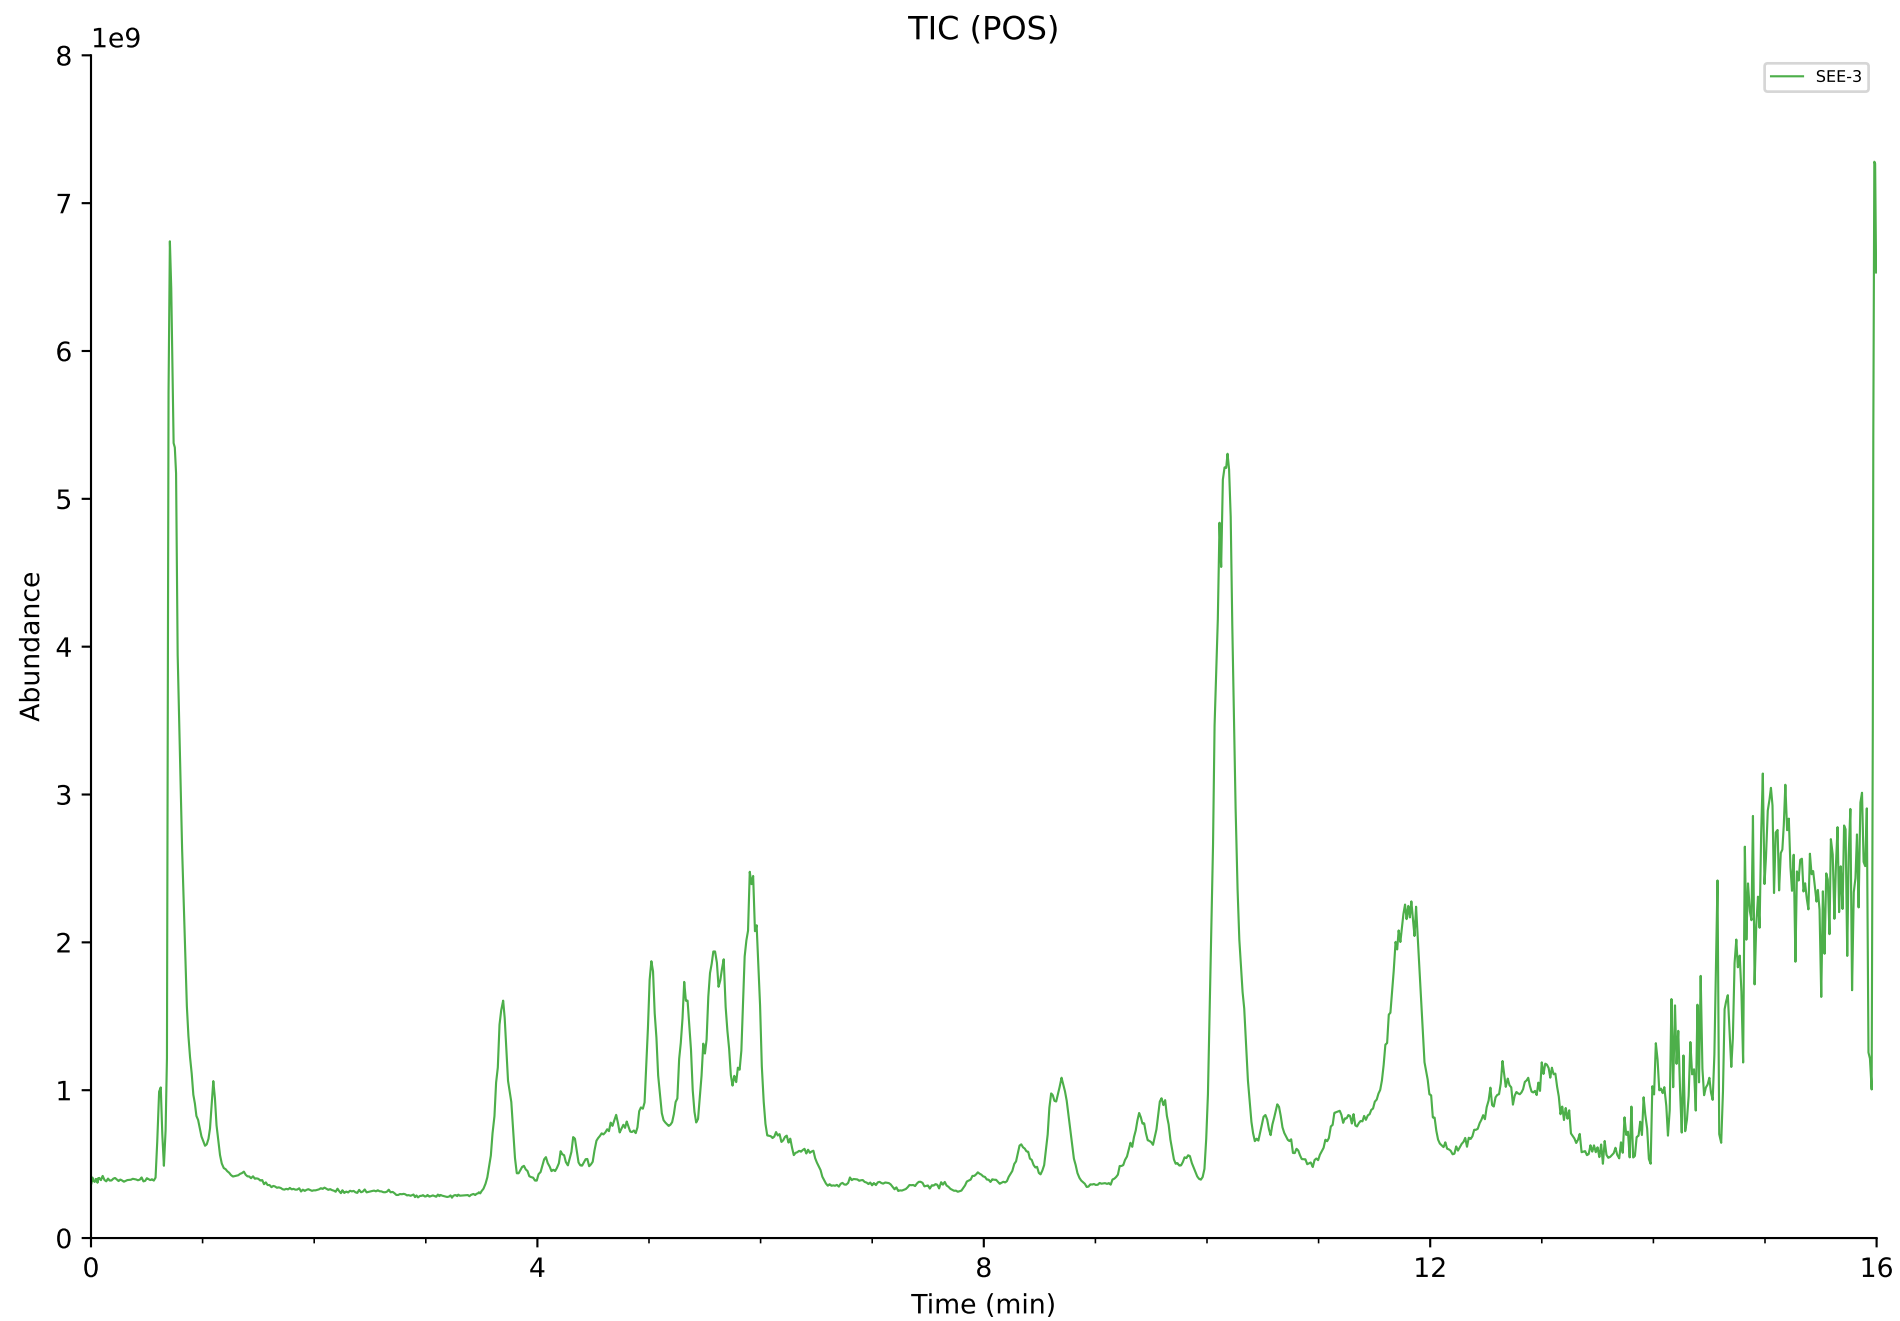

Supplement: identification_of_ingredients.zip [file TIC-POS-SEE-3.pdf › identification of ingredients/Data analysis/2.chromatogram/TIC-POS-SEE-3.pdf]

# TIC (POS)

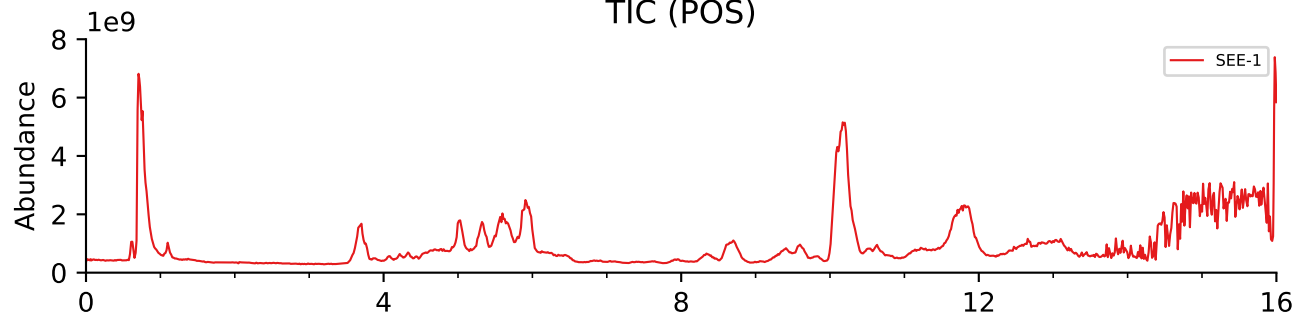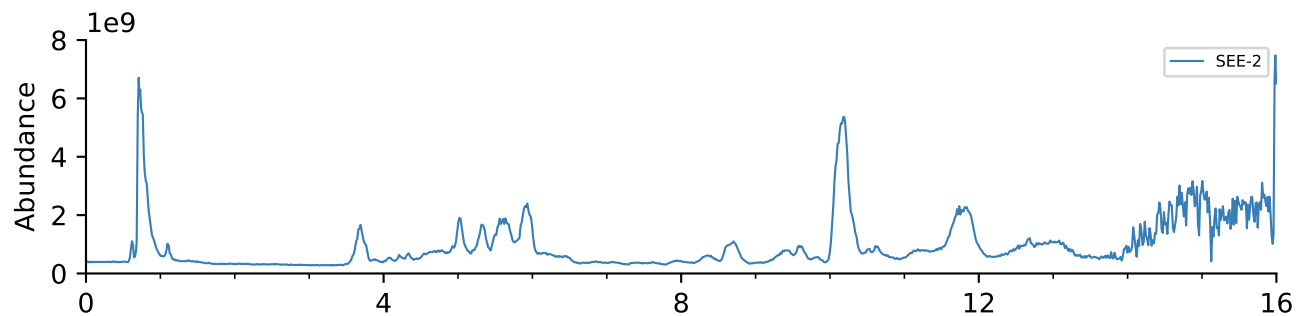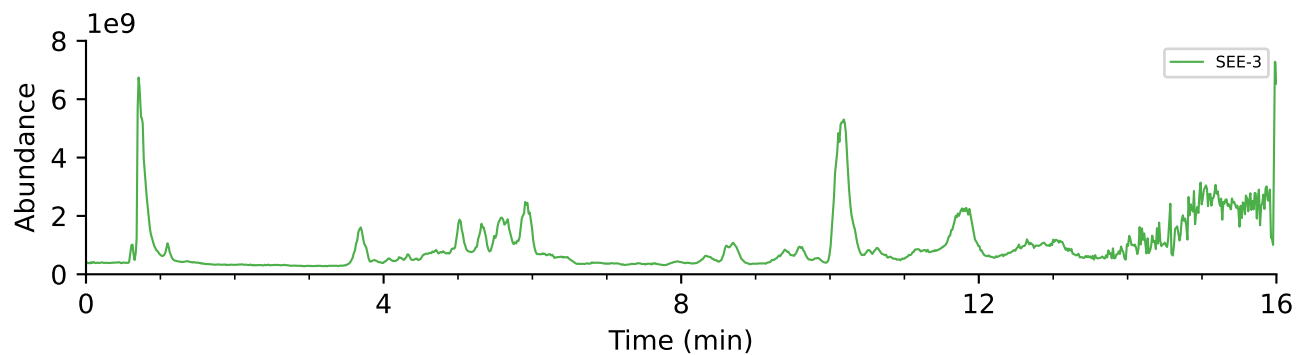

Supplement: identification_of_ingredients.zip [file TIC-POS.pdf › identification of ingredients/Data analysis/2.chromatogram/TIC-POS.pdf]

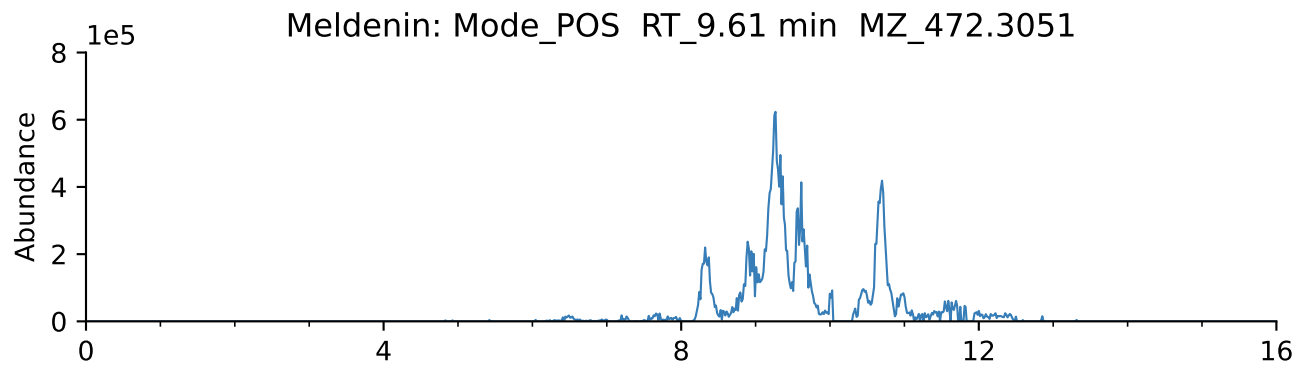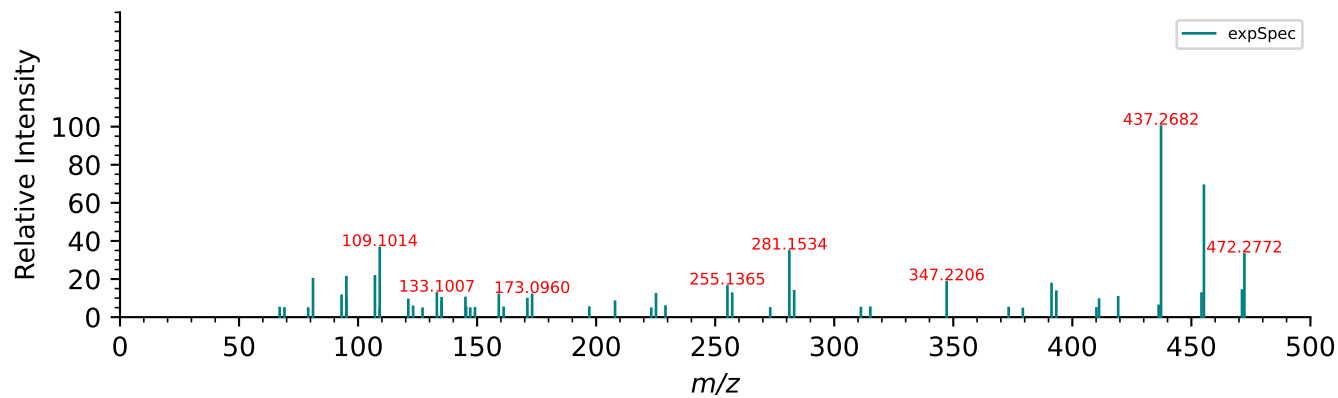

Supplement: identification_of_ingredients.zip [file compound00054.pdf › identification of ingredients/Data analysis/3.mass spectrometry/Original Ingredients/compound00054.pdf]

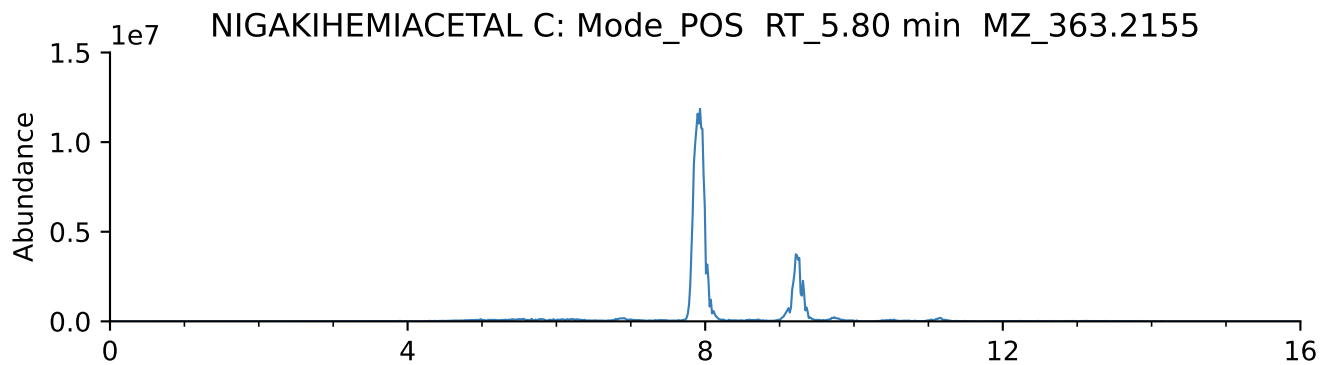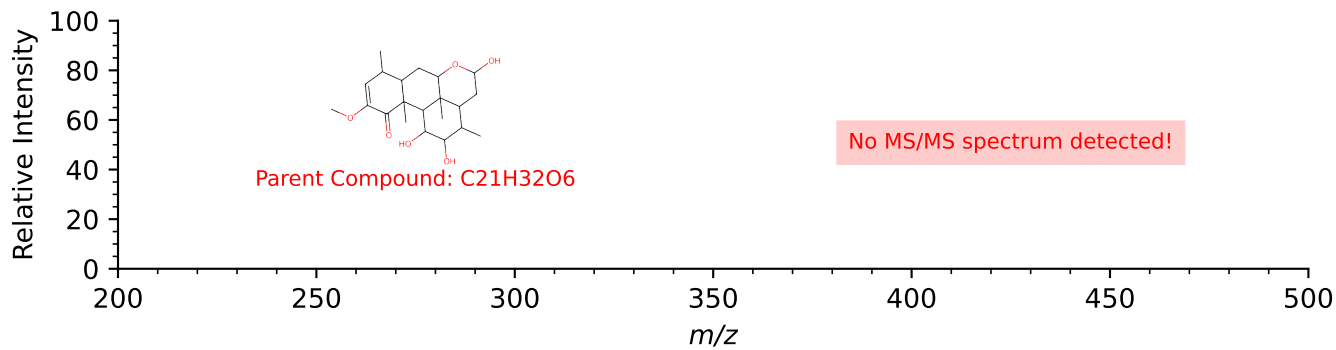

Supplement: identification_of_ingredients.zip [file compound00056.pdf › identification of ingredients/Data analysis/3.mass spectrometry/Original Ingredients/compound00056.pdf]

Nonenoic acid: Mode\_NEG RT\_8.11 min MZ\_311.2227

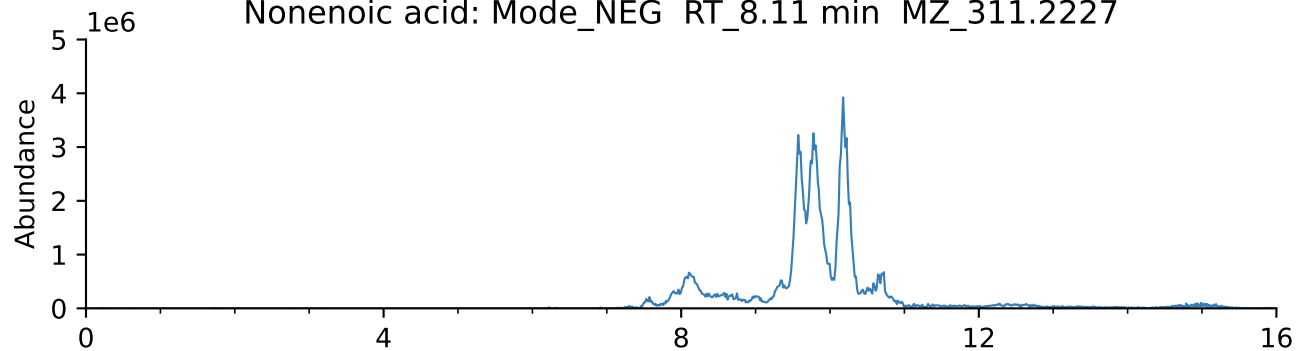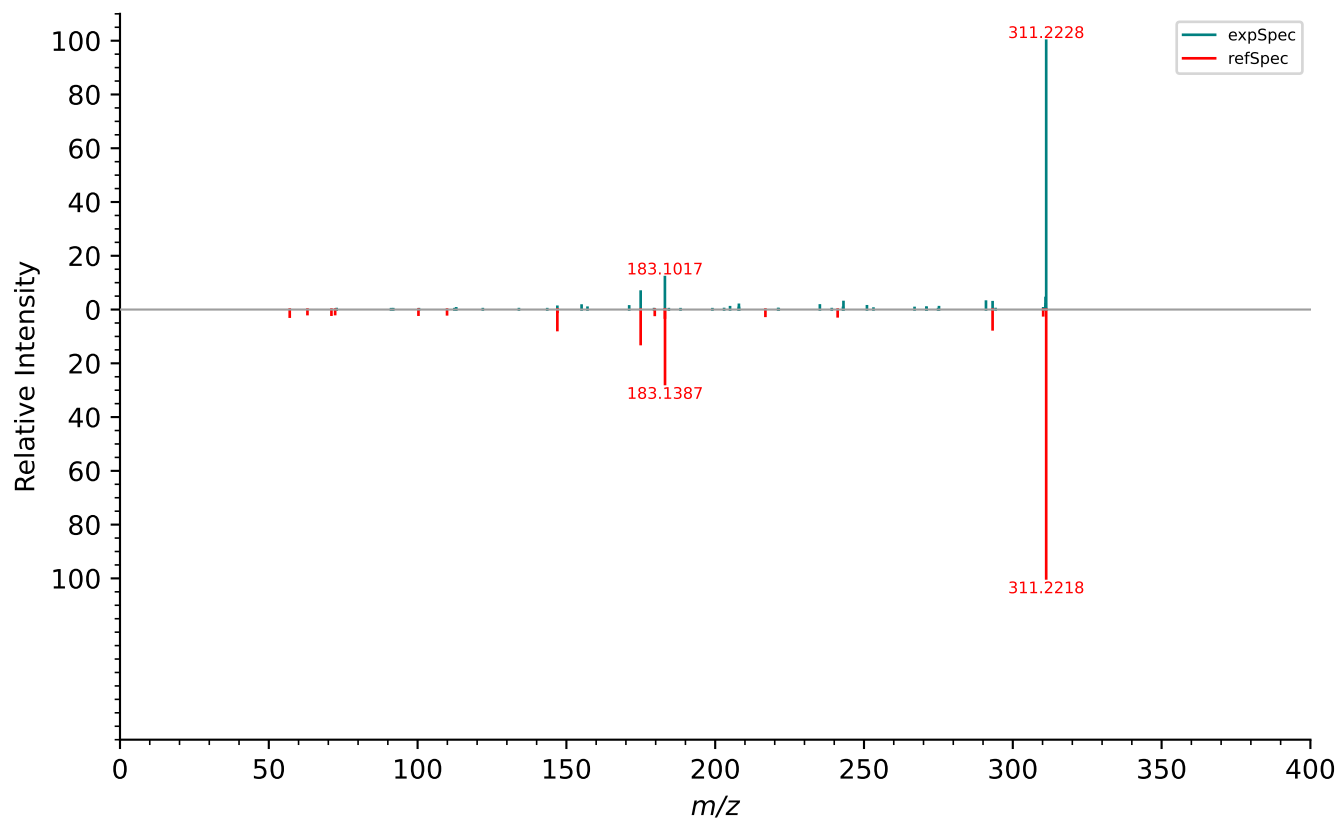

Supplement: identification_of_ingredients.zip [file compound00058.pdf › identification of ingredients/Data analysis/3.mass spectrometry/Original Ingredients/compound00058.pdf]

mansumbinol: Mode\_POS RT\_13.27 min MZ\_334.3100

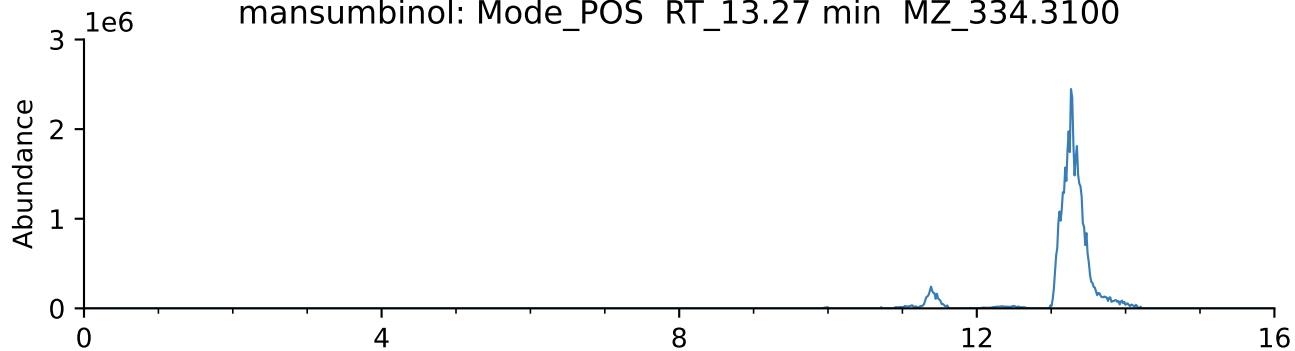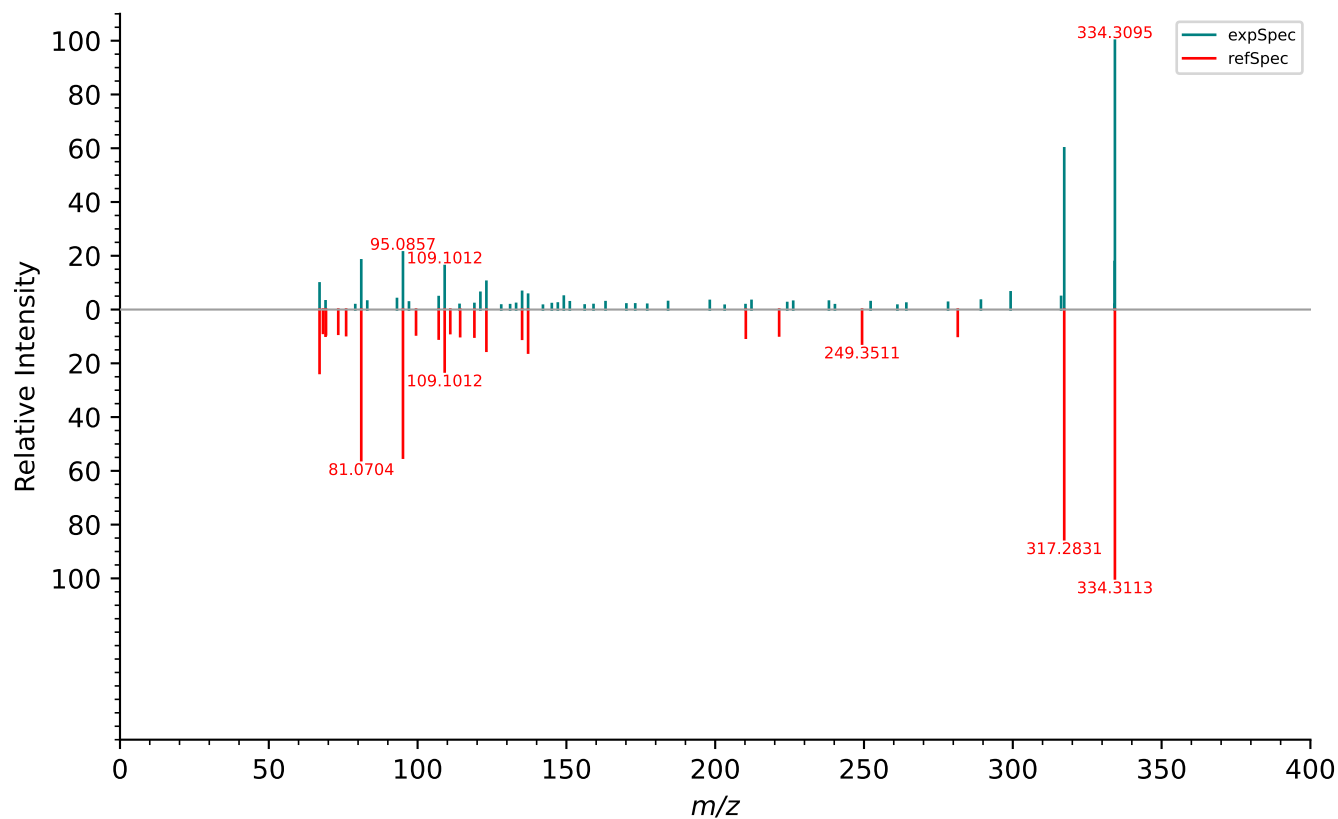

Supplement: identification_of_ingredients.zip [file compound00061.pdf › identification of ingredients/Data analysis/3.mass spectrometry/Original Ingredients/compound00061.pdf]

N-(p-Nydroxyphenethyl)actinidine: Mode\_POS RT\_4.57 min MZ\_307.1324

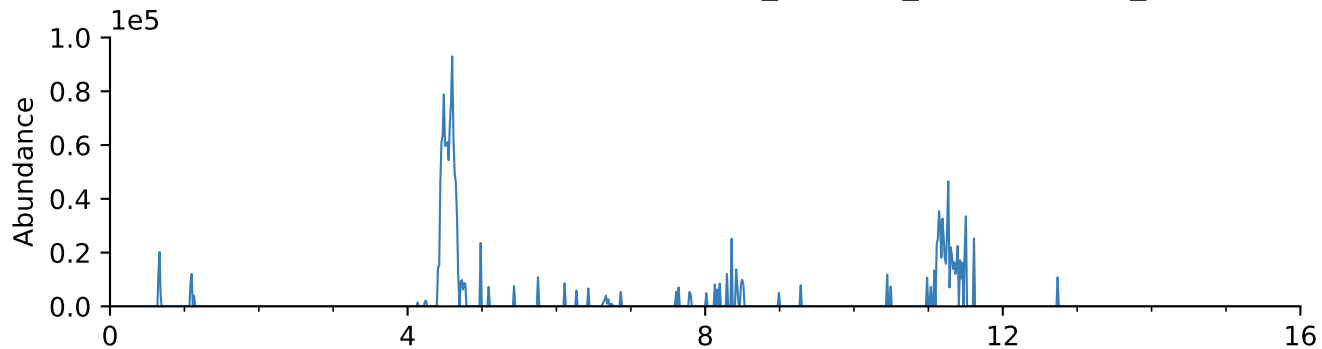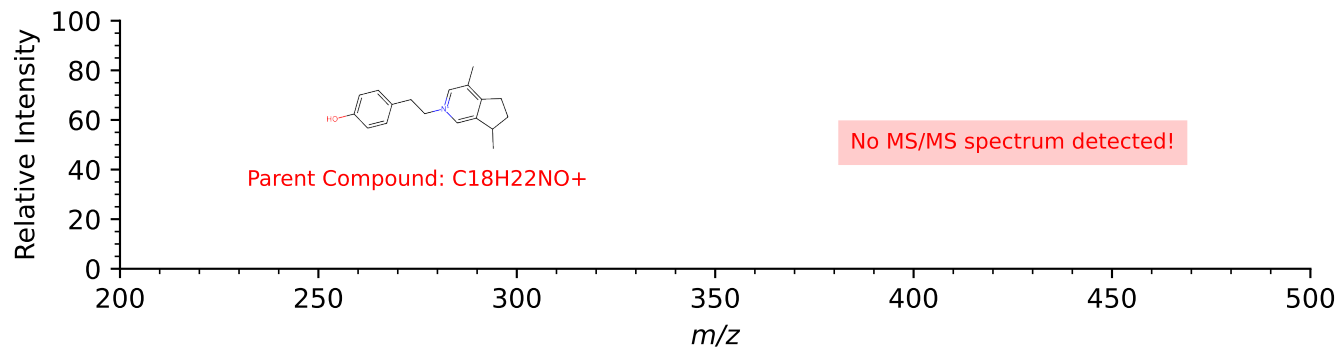

Supplement: identification_of_ingredients.zip [file compound00063.pdf › identification of ingredients/Data analysis/3.mass spectrometry/Original Ingredients/compound00063.pdf]

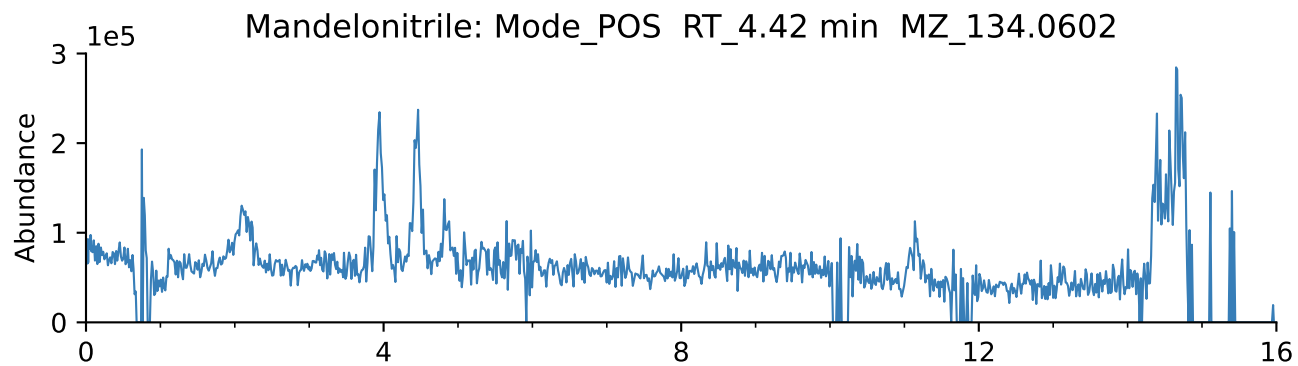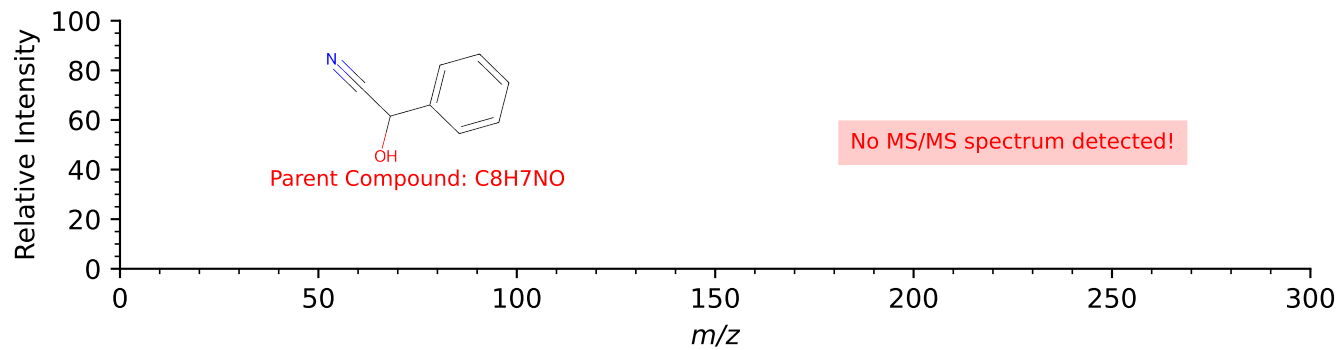

Supplement: identification_of_ingredients.zip [file compound00064.pdf › identification of ingredients/Data analysis/3.mass spectrometry/Original Ingredients/compound00064.pdf]

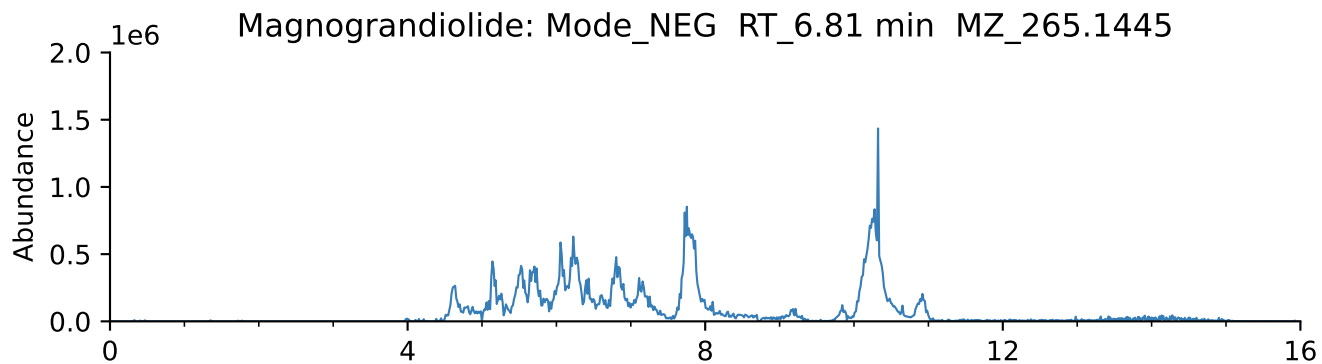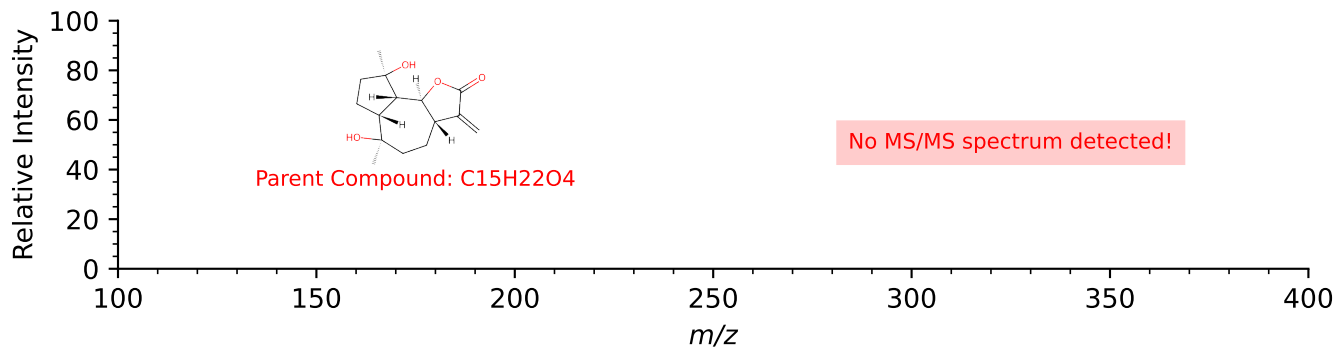

Supplement: identification_of_ingredients.zip [file compound00065.pdf › identification of ingredients/Data analysis/3.mass spectrometry/Original Ingredients/compound00065.pdf]

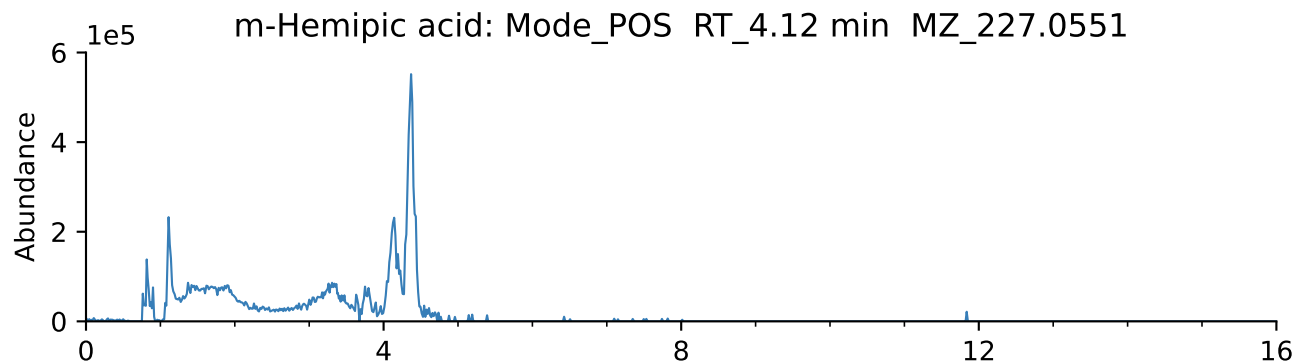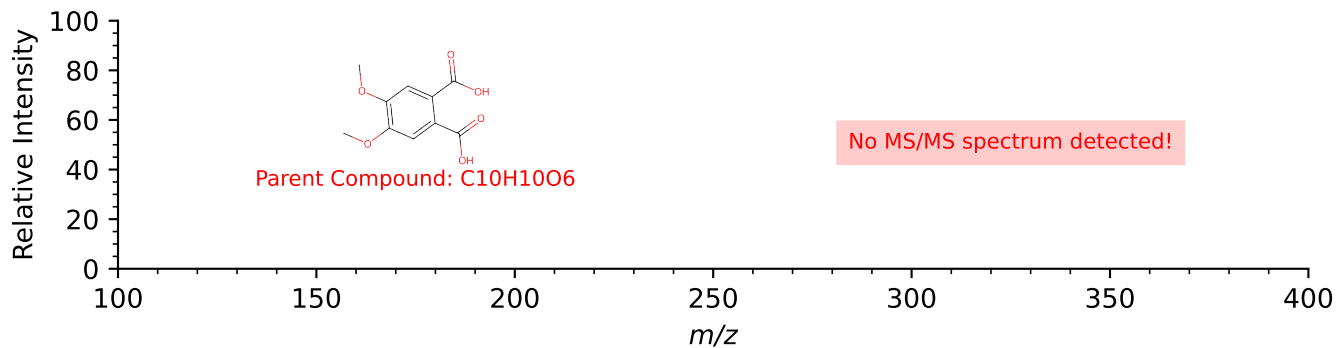

Supplement: identification_of_ingredients.zip [file compound00066.pdf › identification of ingredients/Data analysis/3.mass spectrometry/Original Ingredients/compound00066.pdf]

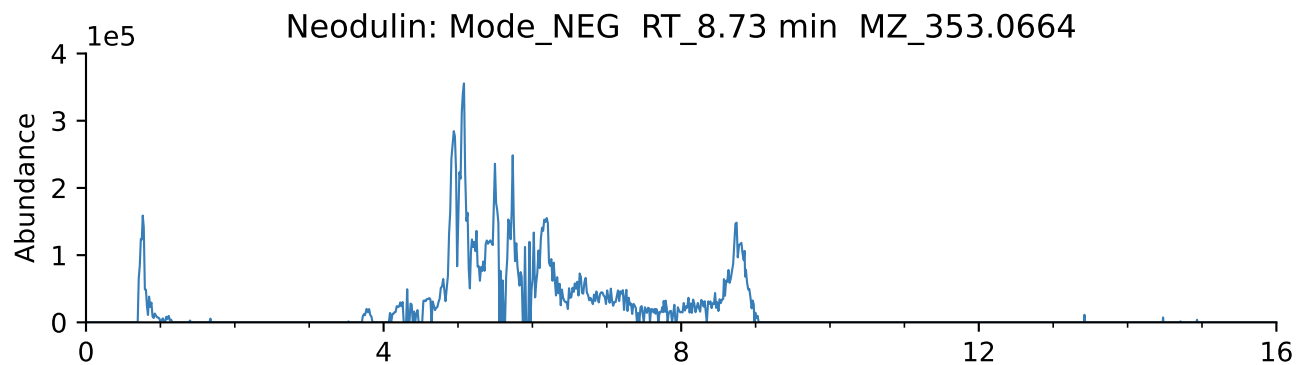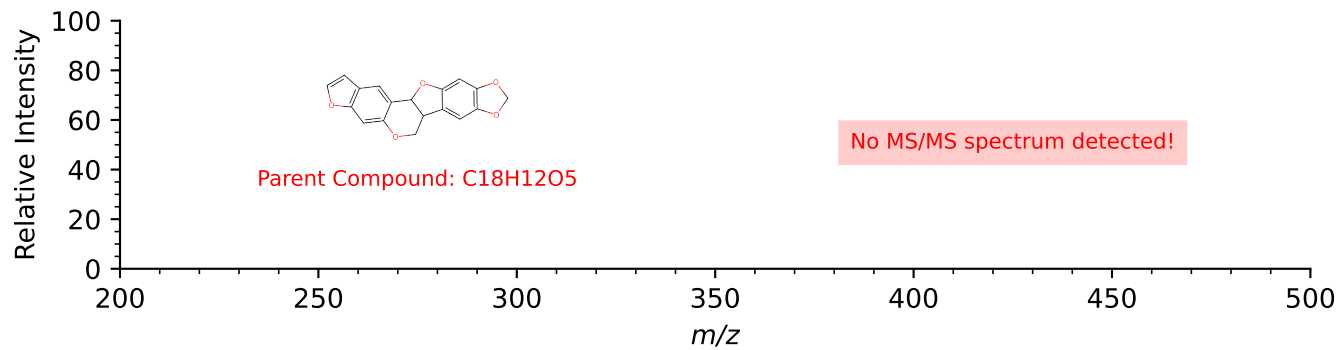

Supplement: identification_of_ingredients.zip [file compound00073.pdf › identification of ingredients/Data analysis/3.mass spectrometry/Original Ingredients/compound00073.pdf]

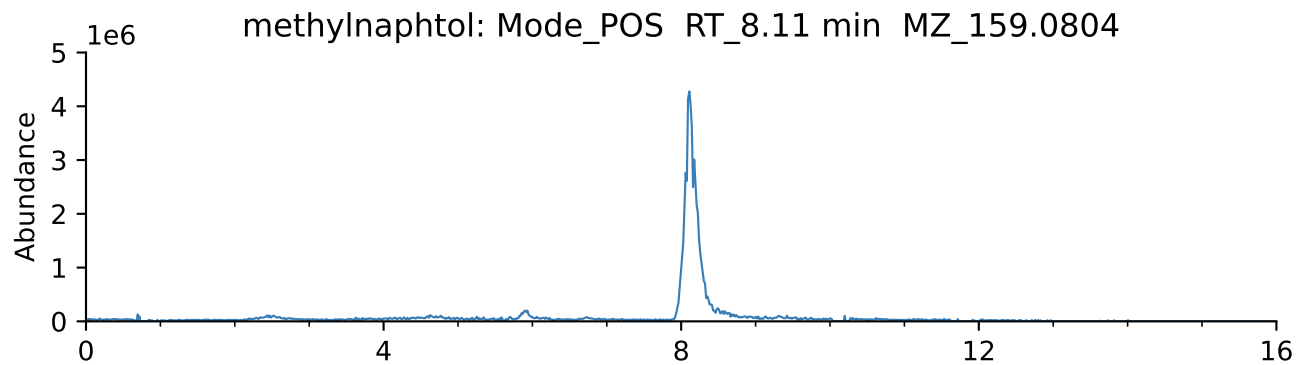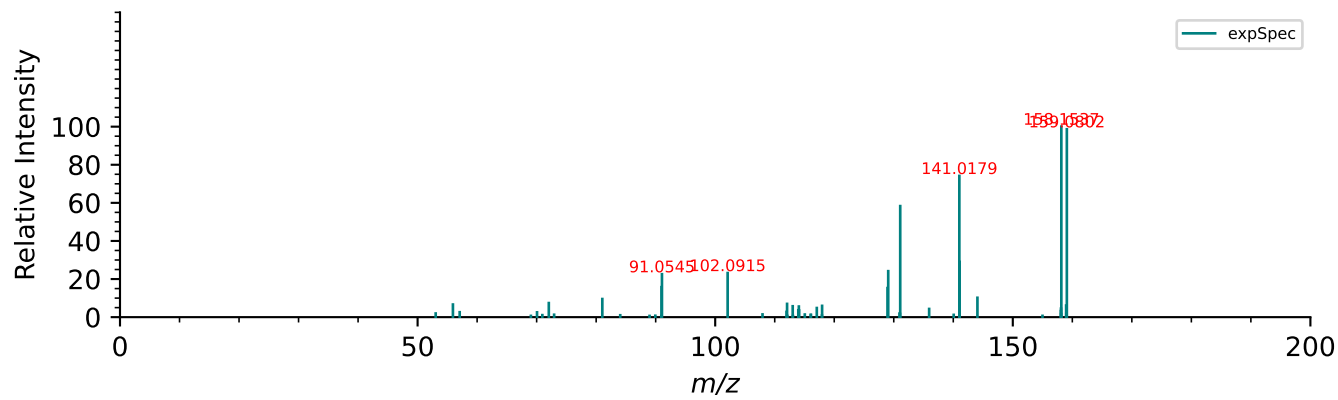

Supplement: identification_of_ingredients.zip [file compound00074.pdf › identification of ingredients/Data analysis/3.mass spectrometry/Original Ingredients/compound00074.pdf]

Methylbeta-D-fructofuranoside: Mode\_POS RT\_0.87 min MZ\_217.0683

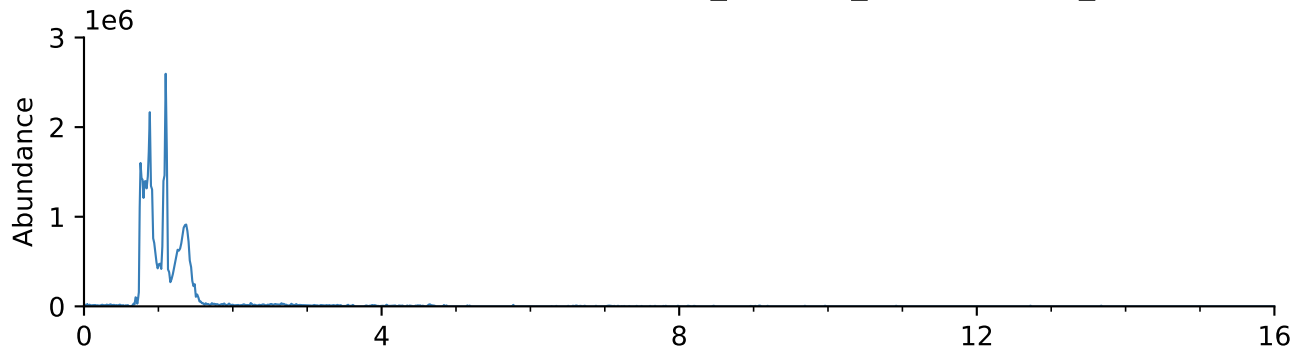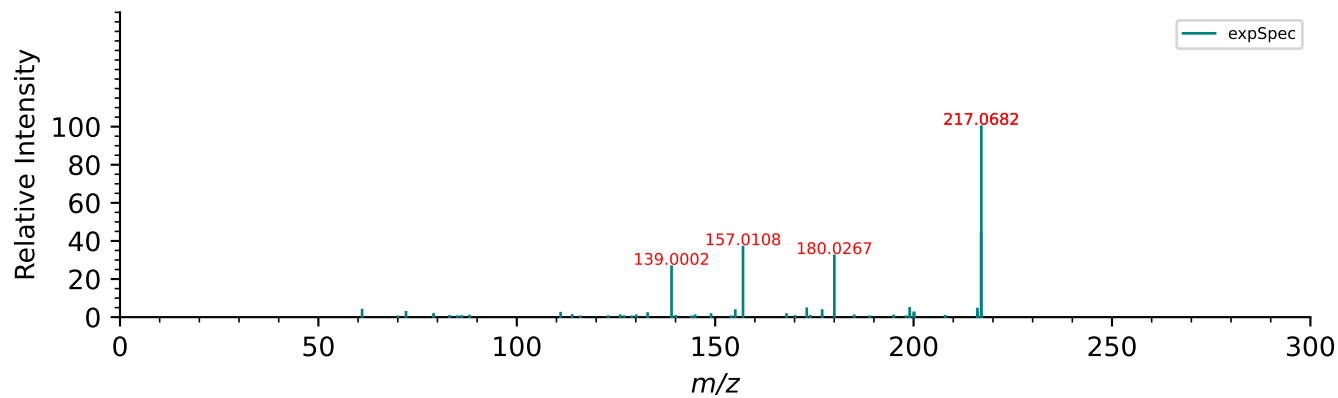

Supplement: identification_of_ingredients.zip [file compound00075.pdf › identification of ingredients/Data analysis/3.mass spectrometry/Original Ingredients/compound00075.pdf]

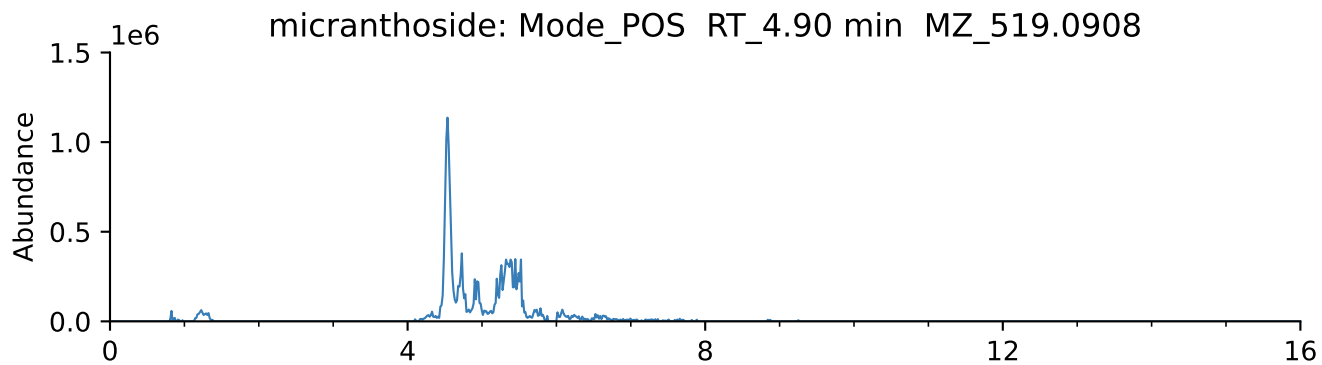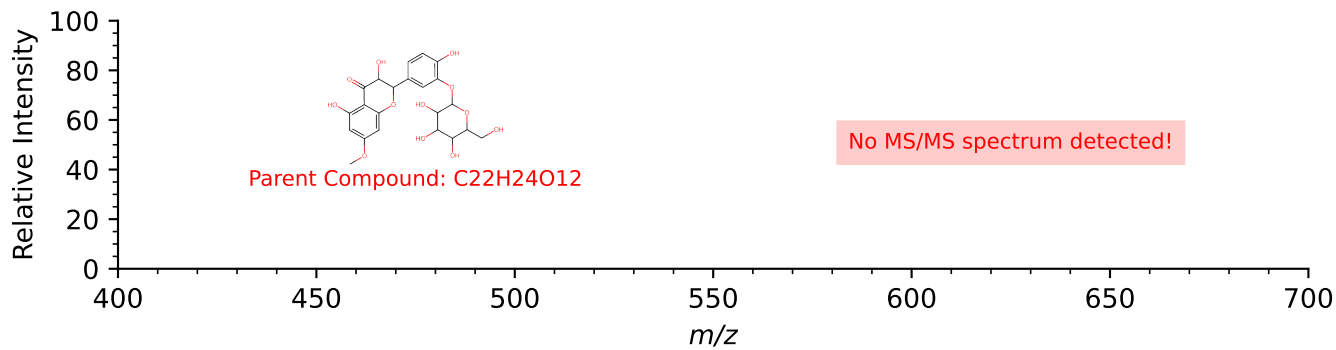

Supplement: identification_of_ingredients.zip [file compound00080.pdf › identification of ingredients/Data analysis/3.mass spectrometry/Original Ingredients/compound00080.pdf]

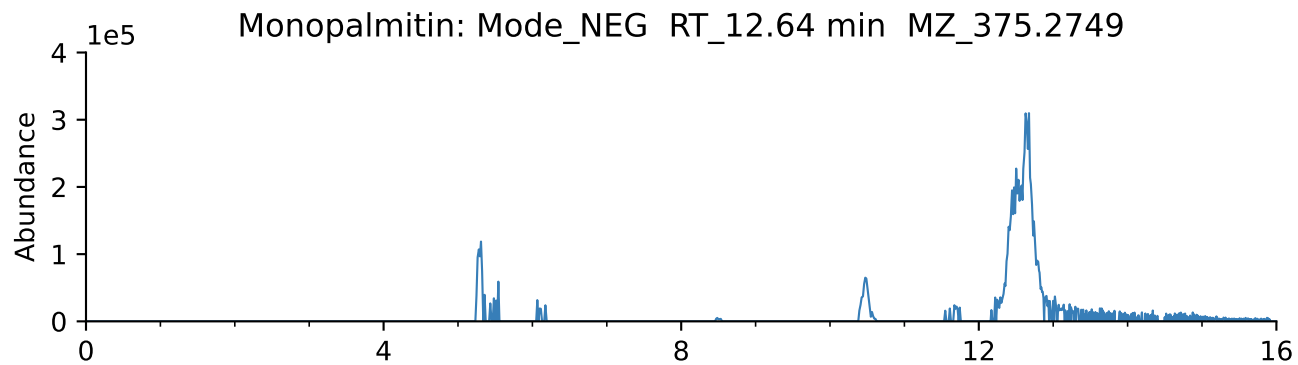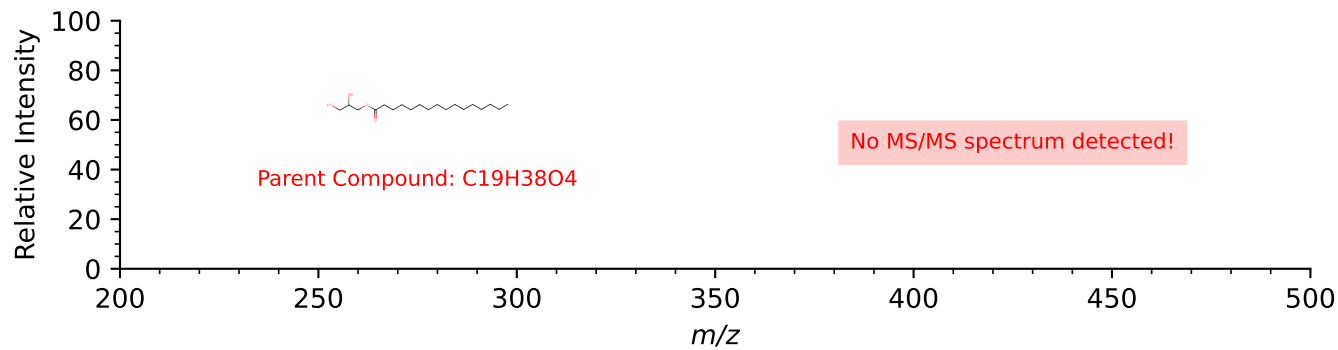

Supplement: identification_of_ingredients.zip [file compound00081.pdf › identification of ingredients/Data analysis/3.mass spectrometry/Original Ingredients/compound00081.pdf]

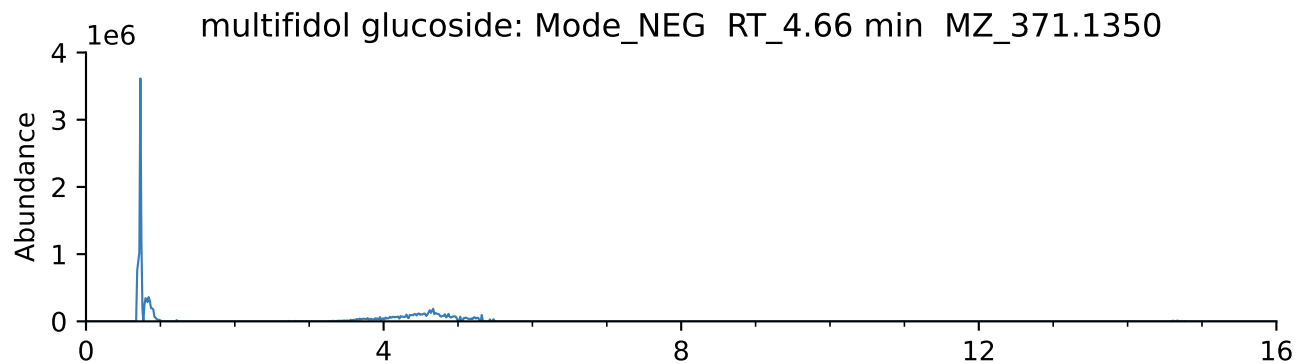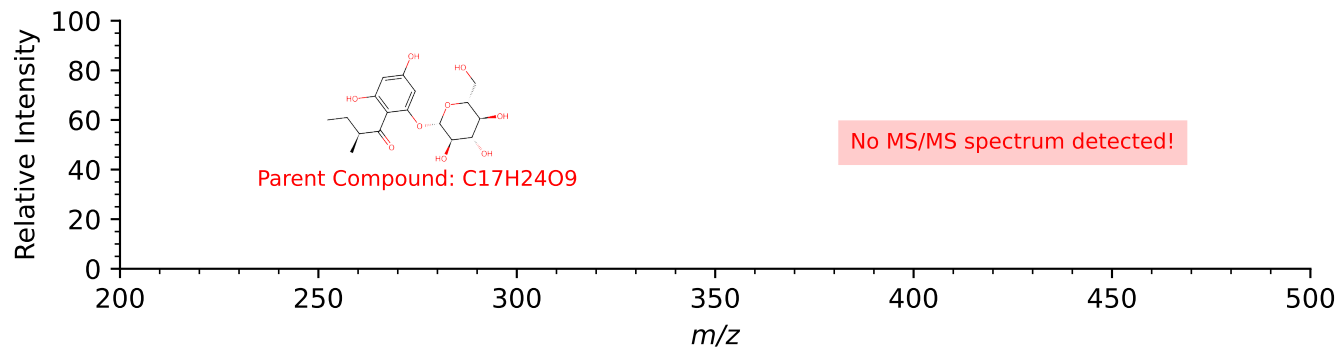

Supplement: identification_of_ingredients.zip [file compound00082.pdf › identification of ingredients/Data analysis/3.mass spectrometry/Original Ingredients/compound00082.pdf]

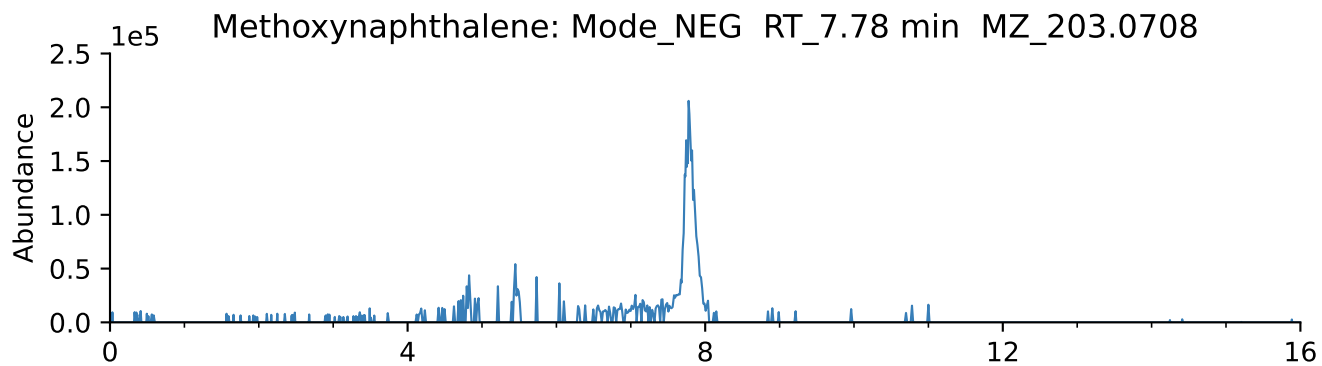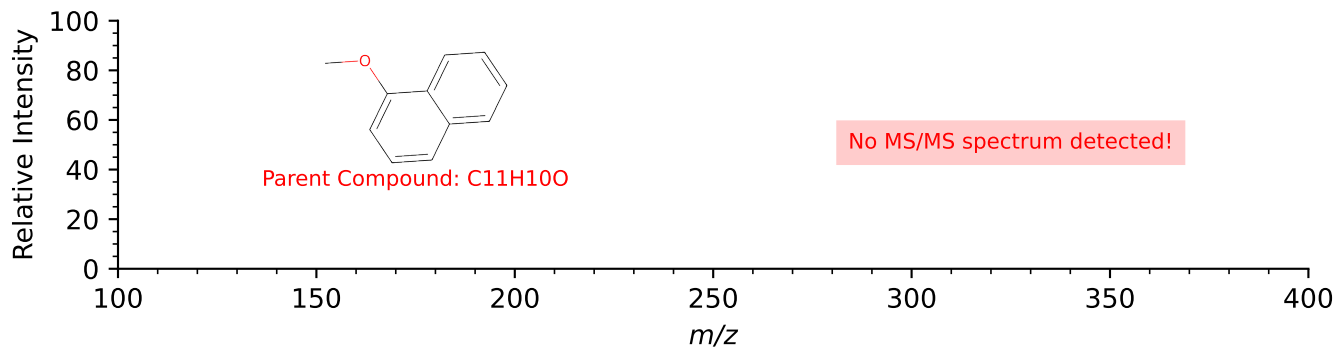

Supplement: identification_of_ingredients.zip [file compound00085.pdf › identification of ingredients/Data analysis/3.mass spectrometry/Original Ingredients/compound00085.pdf]

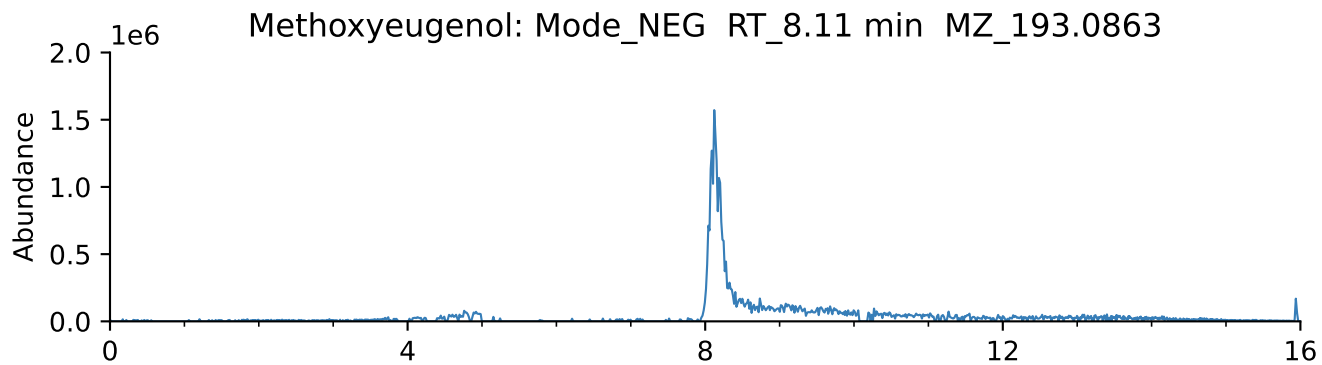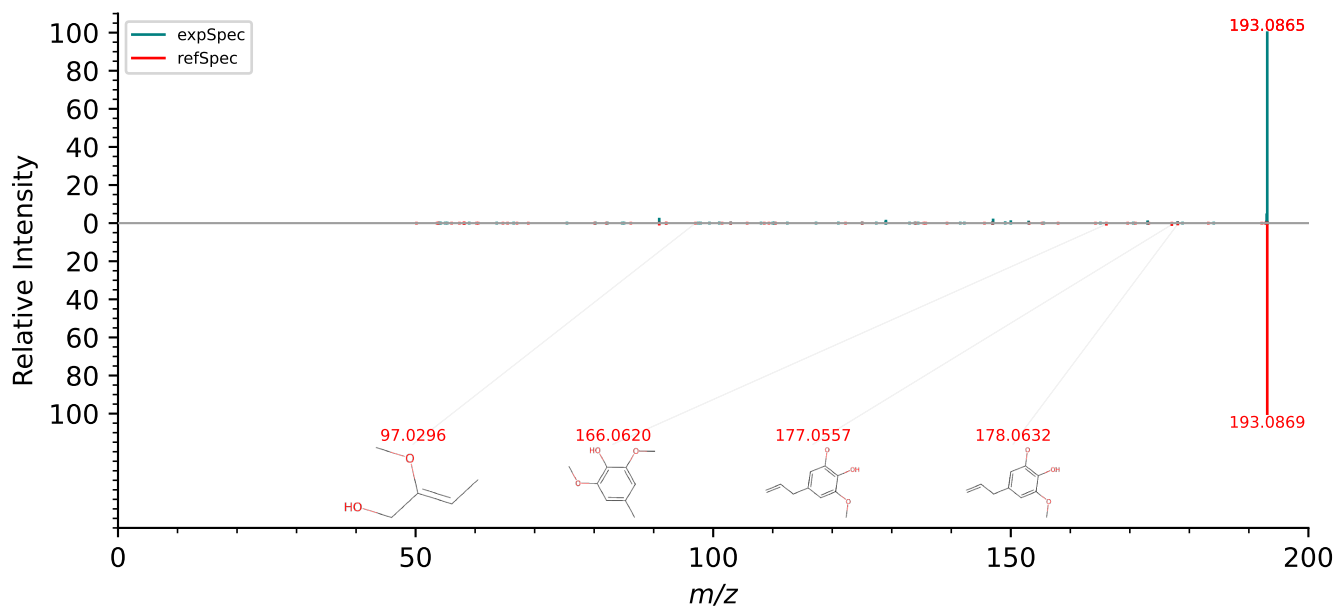

Supplement: identification_of_ingredients.zip [file compound00086.pdf › identification of ingredients/Data analysis/3.mass spectrometry/Original Ingredients/compound00086.pdf]

methyl 6-o-p-cis-coumaroyl- $\beta$ -d-glucop...: Mode\_POS RT\_4.57 min MZ\_363.1050

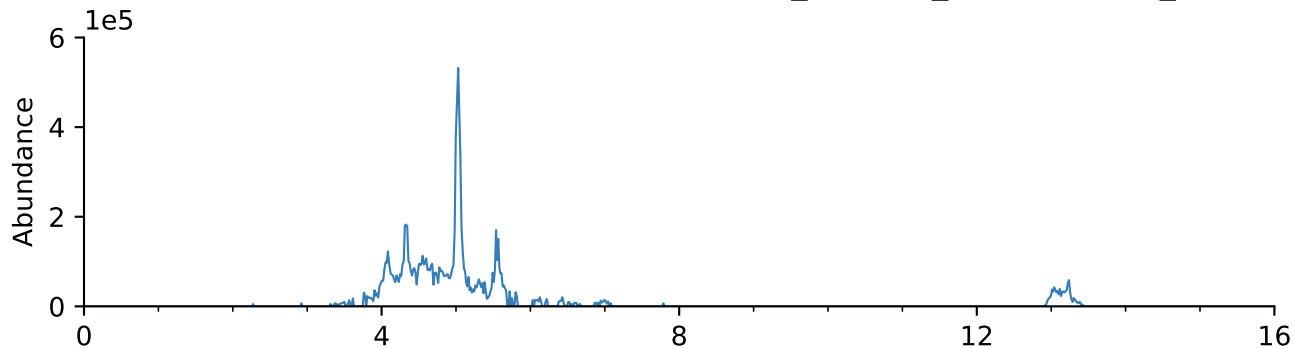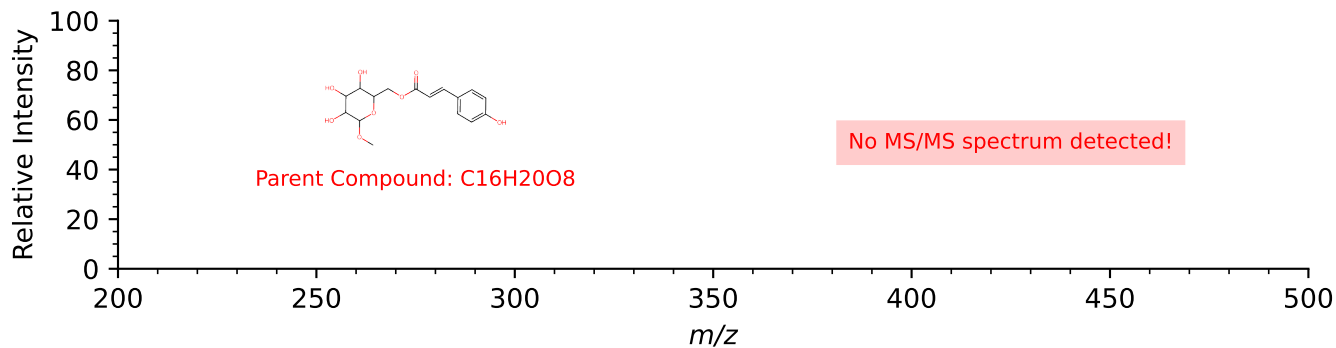

Supplement: identification_of_ingredients.zip [file compound00089.pdf › identification of ingredients/Data analysis/3.mass spectrometry/Original Ingredients/compound00089.pdf]

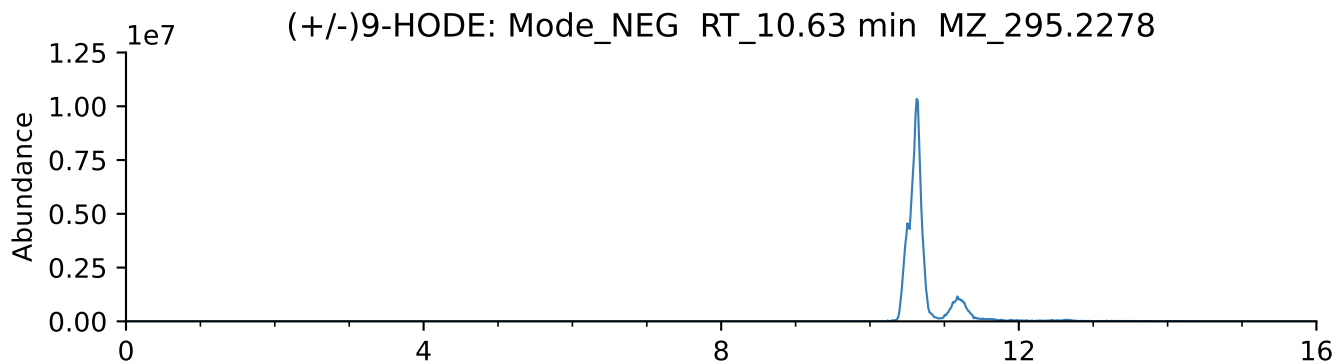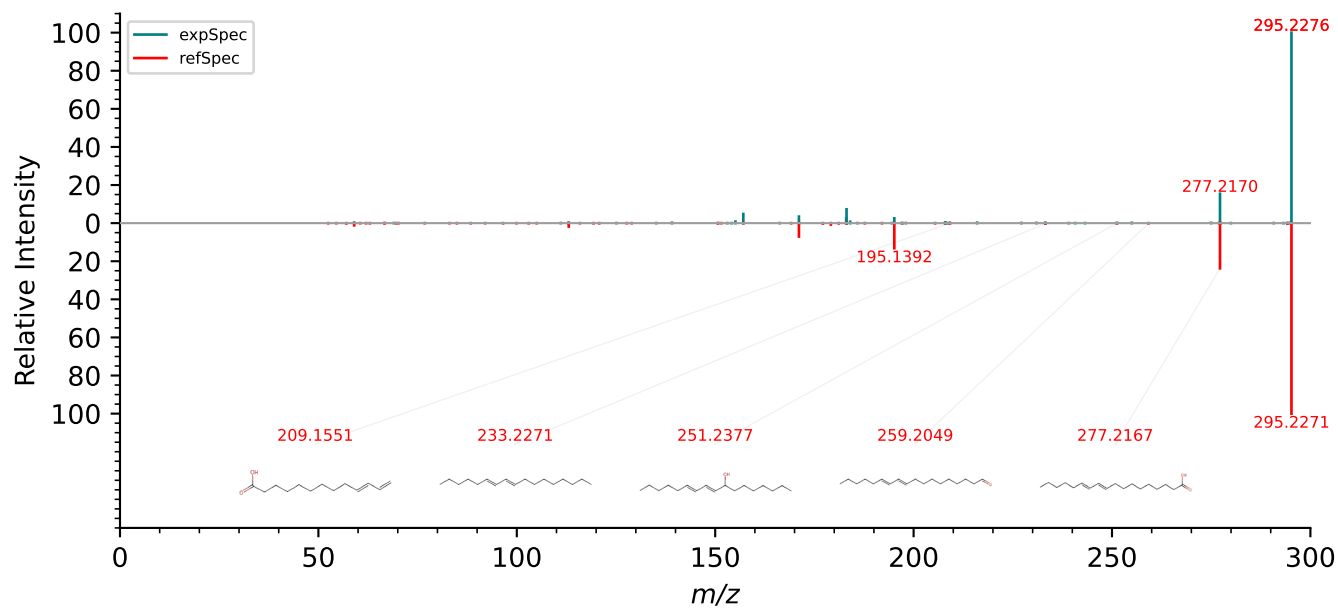

Supplement: identification_of_ingredients.zip [file compound00090.pdf › identification of ingredients/Data analysis/3.mass spectrometry/Original Ingredients/compound00090.pdf]

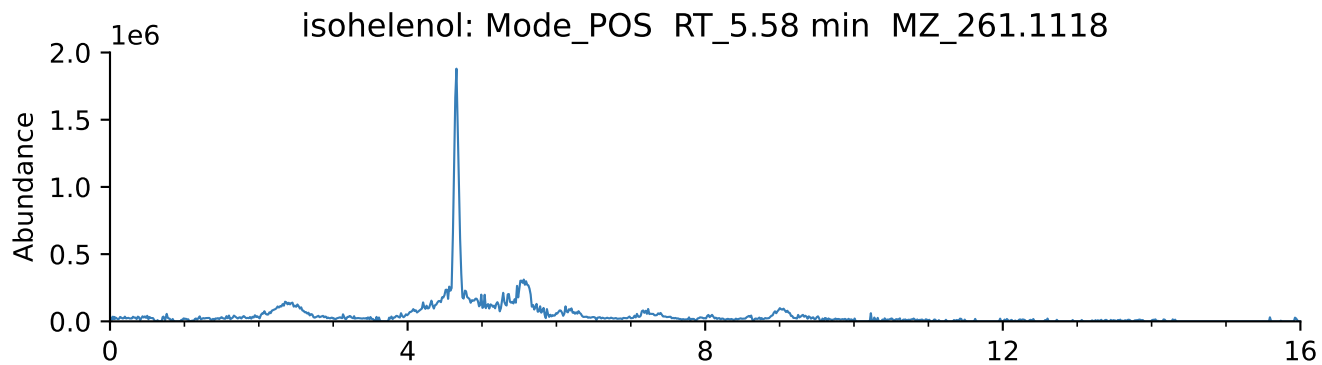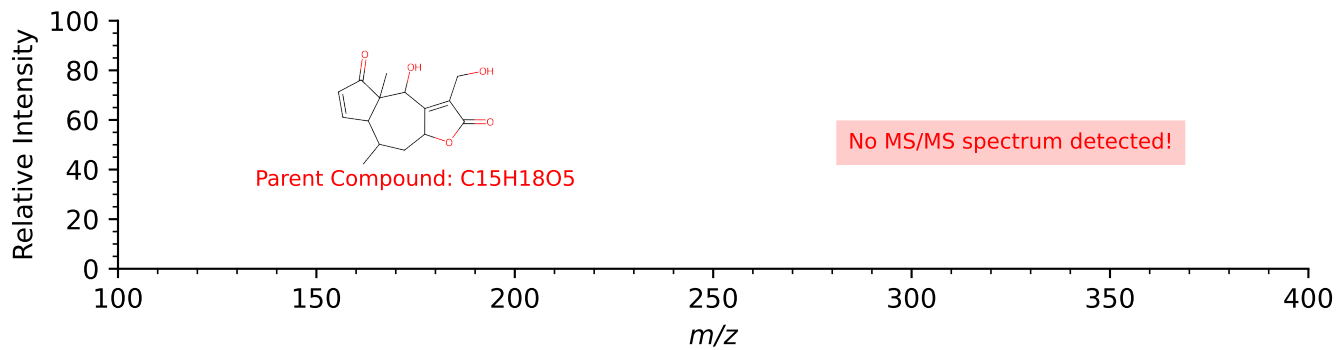

Supplement: identification_of_ingredients.zip [file compound00092.pdf › identification of ingredients/Data analysis/3.mass spectrometry/Original Ingredients/compound00092.pdf]

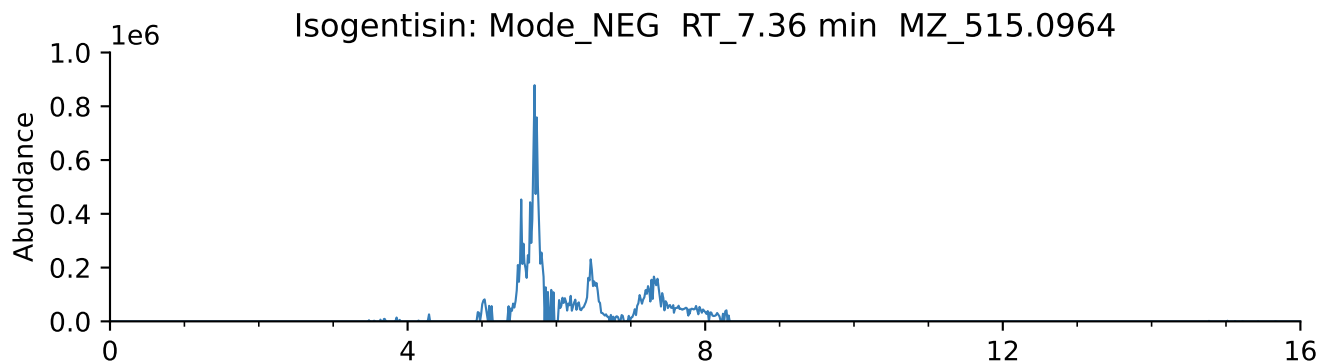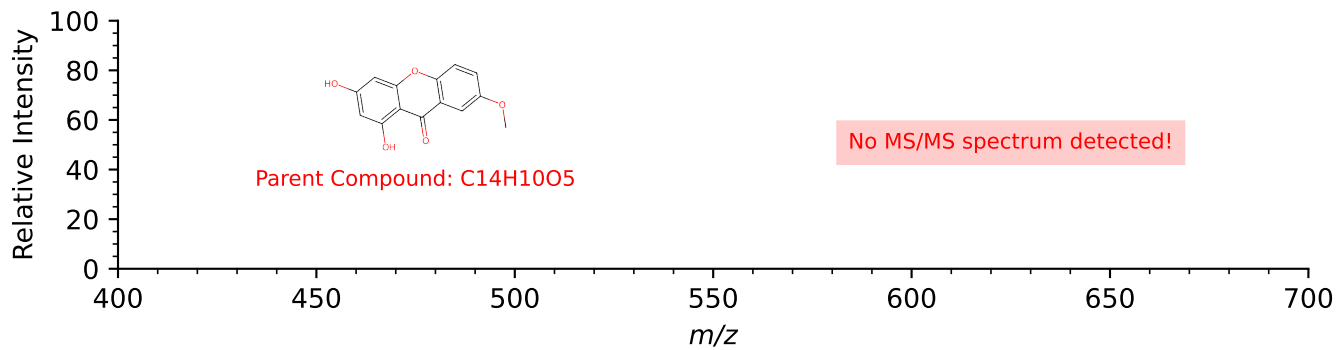

Supplement: identification_of_ingredients.zip [file compound00093.pdf › identification of ingredients/Data analysis/3.mass spectrometry/Original Ingredients/compound00093.pdf]

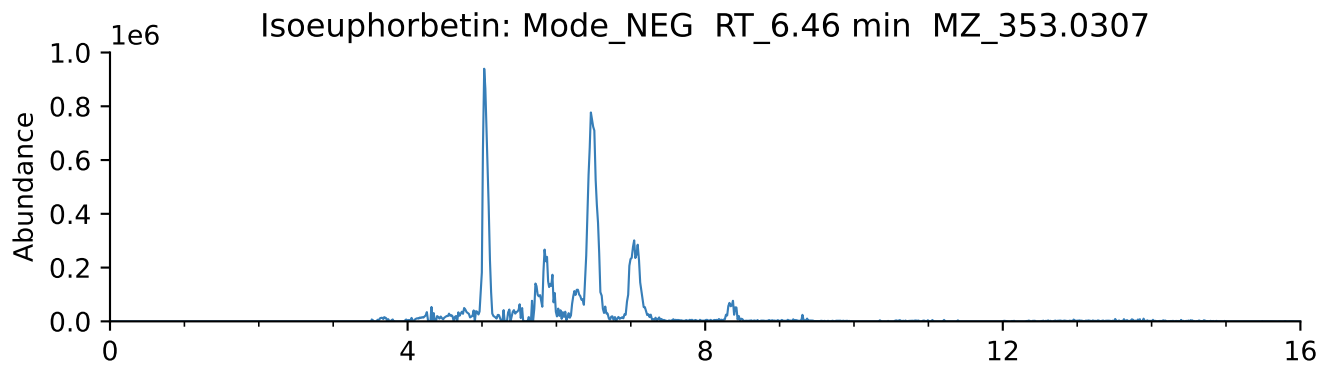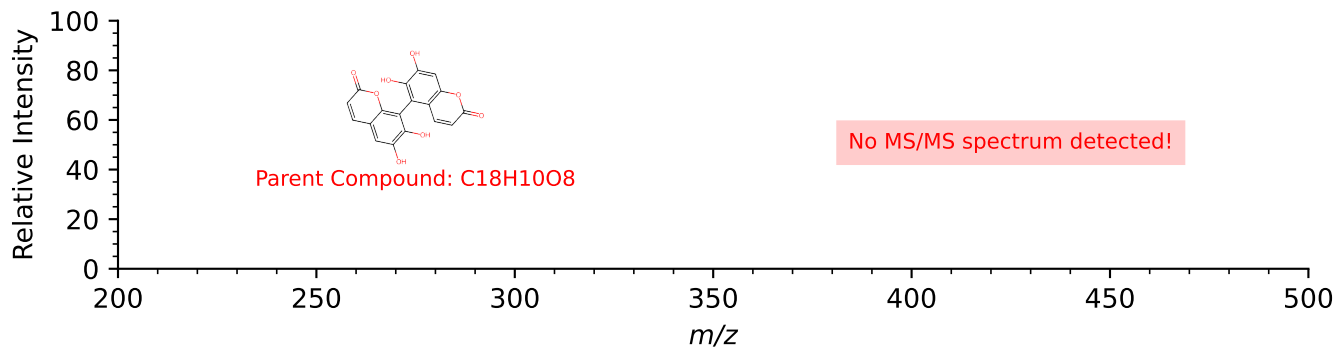

Supplement: identification_of_ingredients.zip [file compound00094.pdf › identification of ingredients/Data analysis/3.mass spectrometry/Original Ingredients/compound00094.pdf]

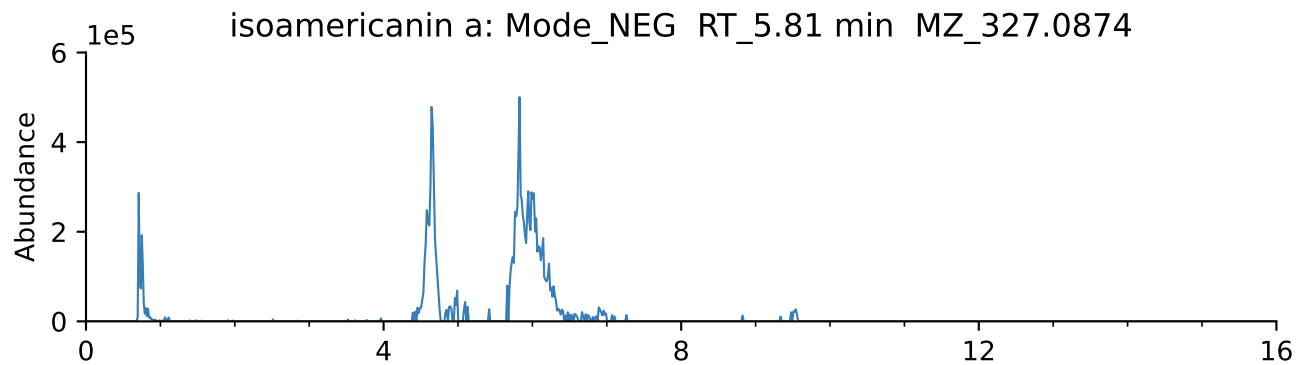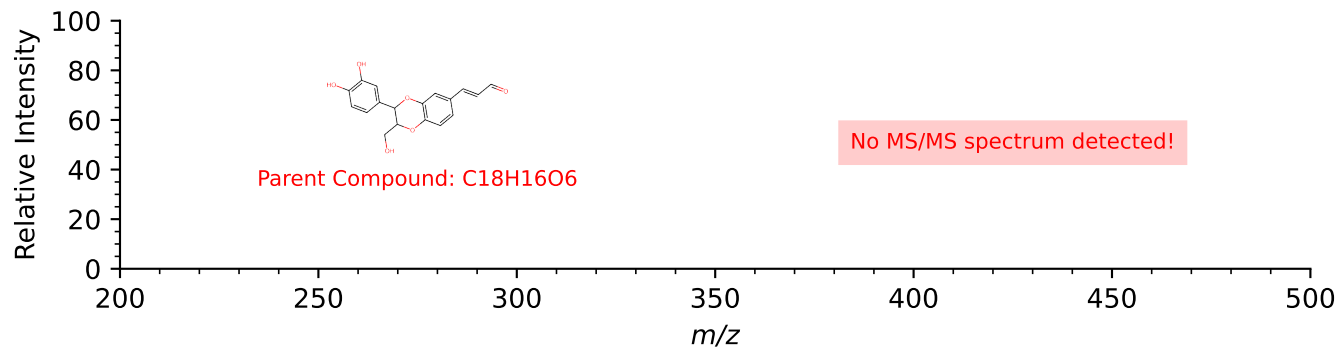

Supplement: identification_of_ingredients.zip [file compound00096.pdf › identification of ingredients/Data analysis/3.mass spectrometry/Original Ingredients/compound00096.pdf]

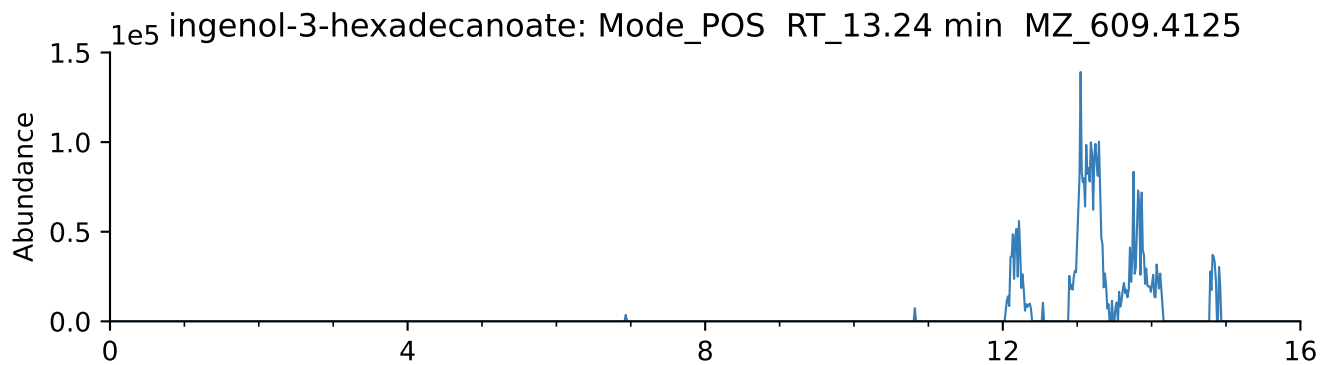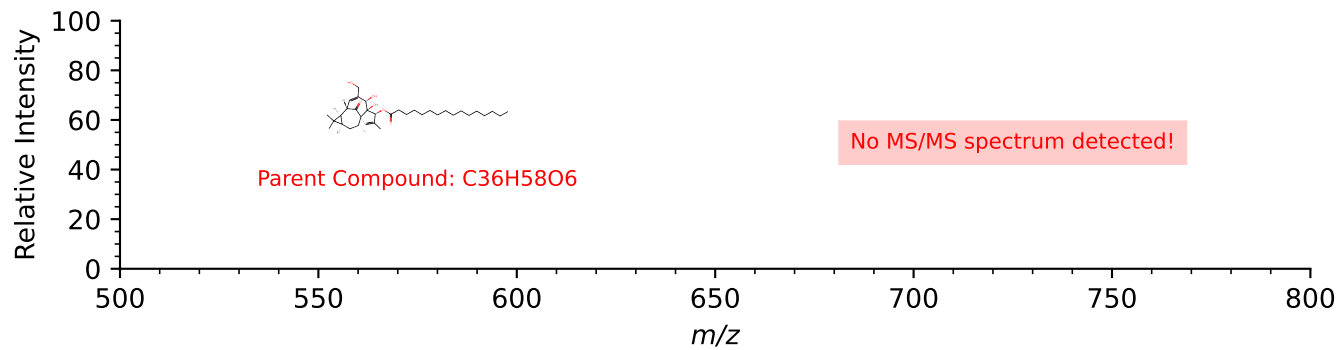

Supplement: identification_of_ingredients.zip [file compound00098.pdf › identification of ingredients/Data analysis/3.mass spectrometry/Original Ingredients/compound00098.pdf]

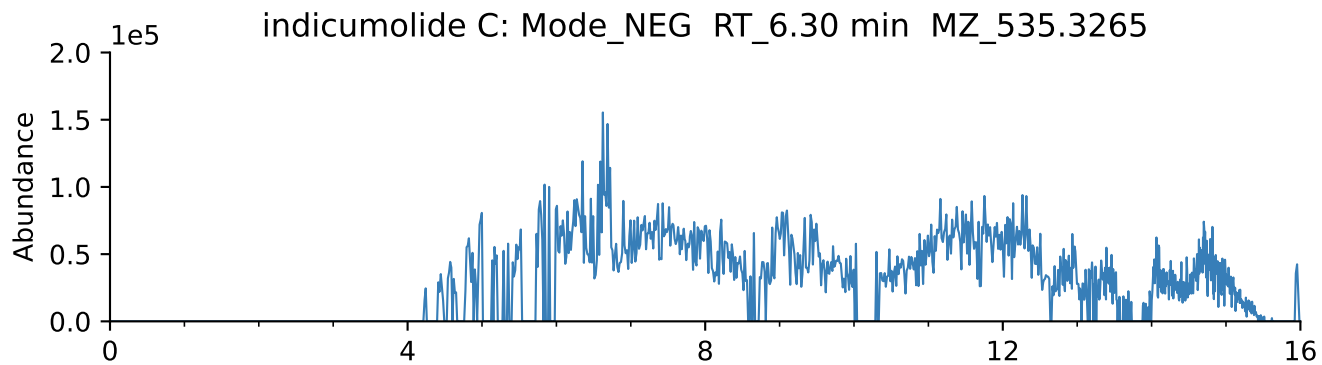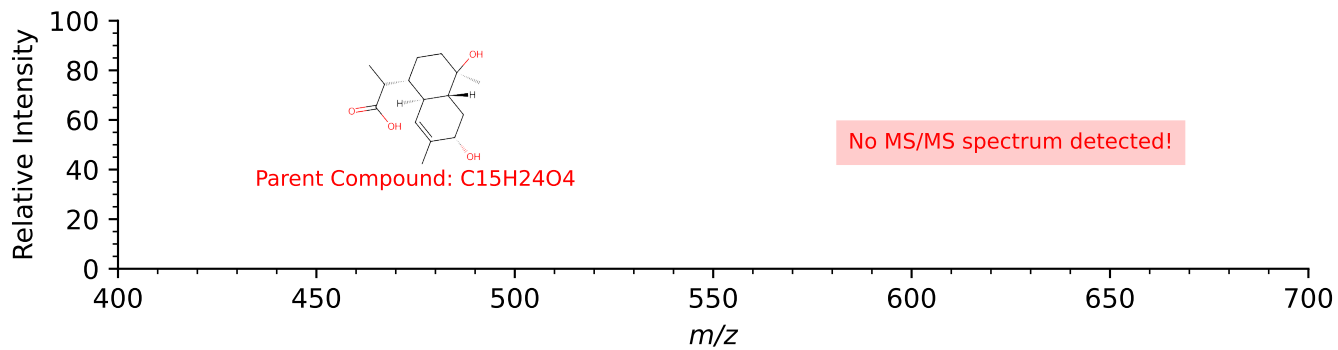

Supplement: identification_of_ingredients.zip [file compound00100.pdf › identification of ingredients/Data analysis/3.mass spectrometry/Original Ingredients/compound00100.pdf]

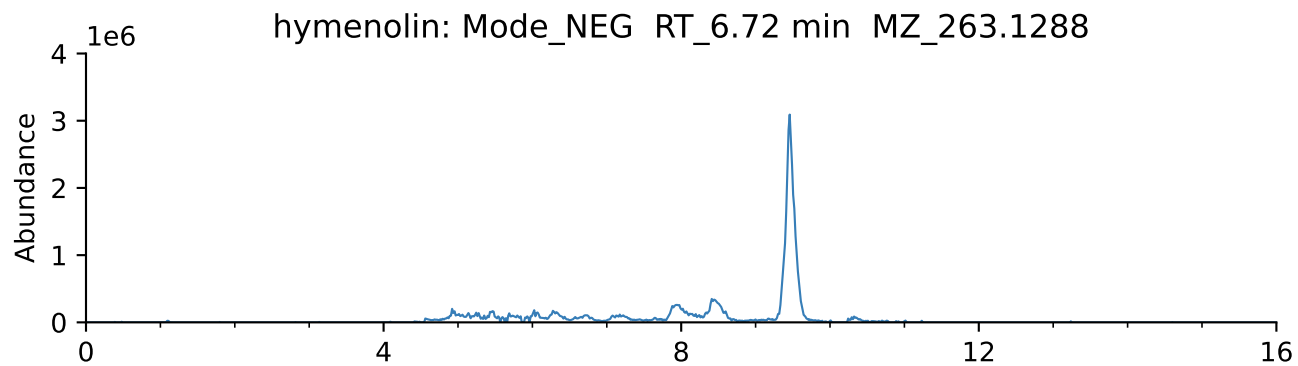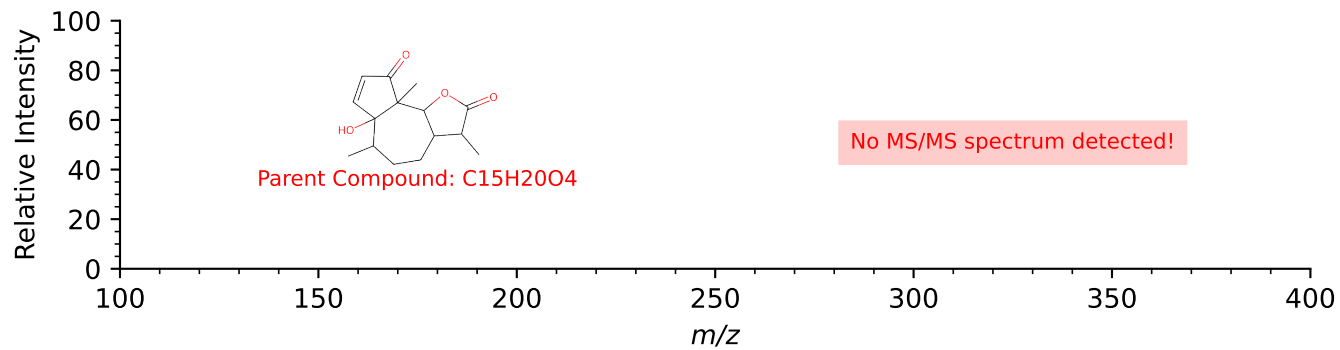

Supplement: identification_of_ingredients.zip [file compound00103.pdf › identification of ingredients/Data analysis/3.mass spectrometry/Original Ingredients/compound00103.pdf]

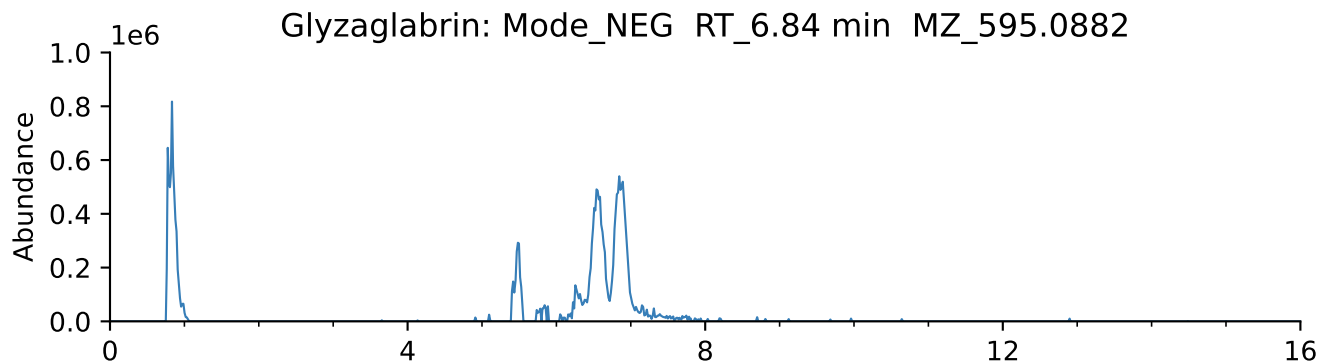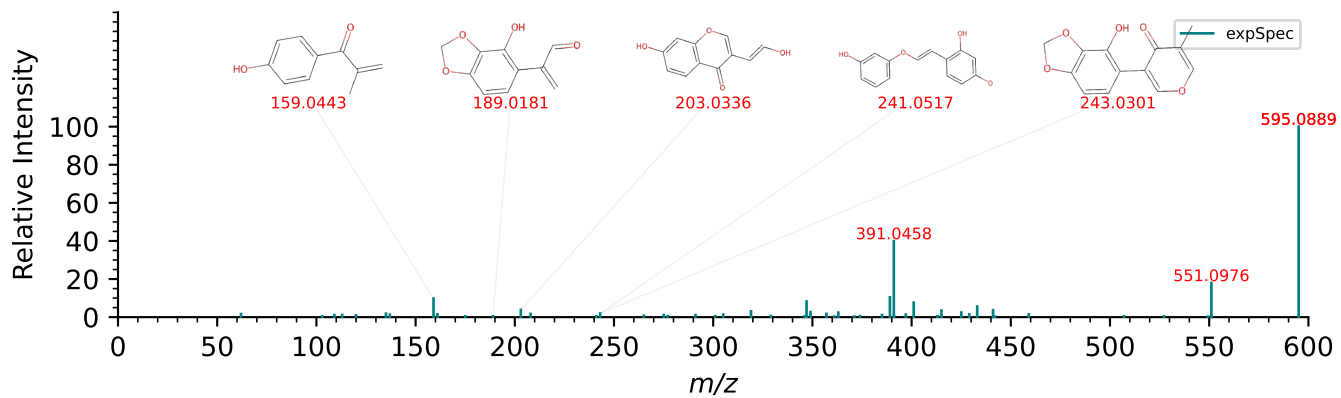

Supplement: identification_of_ingredients.zip [file compound00106.pdf › identification of ingredients/Data analysis/3.mass spectrometry/Original Ingredients/compound00106.pdf]

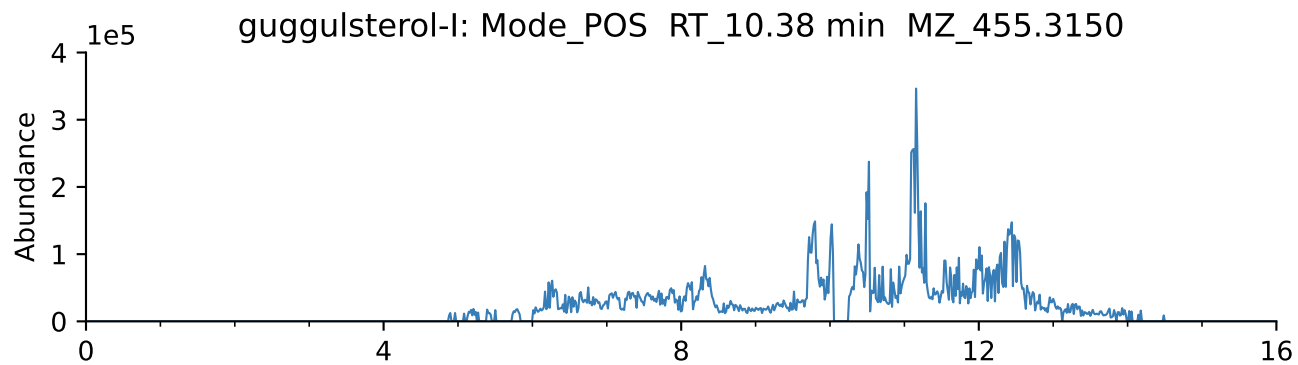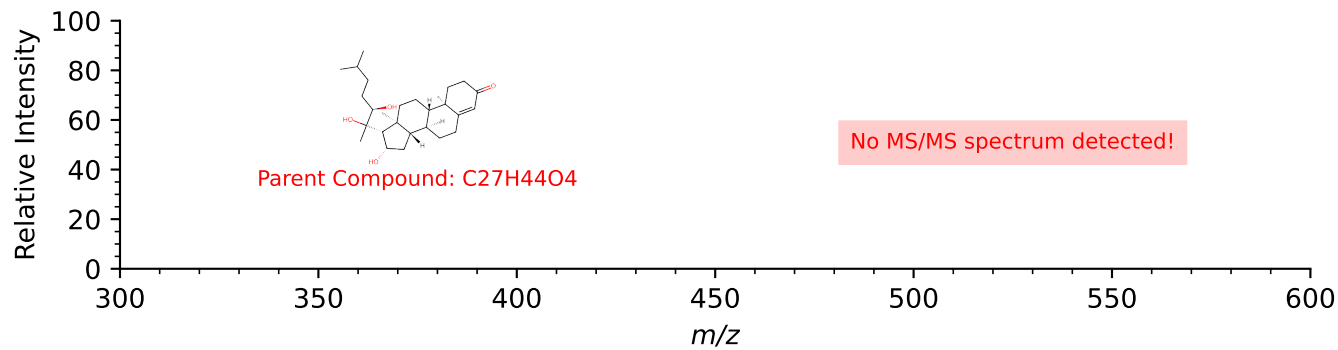

Supplement: identification_of_ingredients.zip [file compound00108.pdf › identification of ingredients/Data analysis/3.mass spectrometry/Original Ingredients/compound00108.pdf]

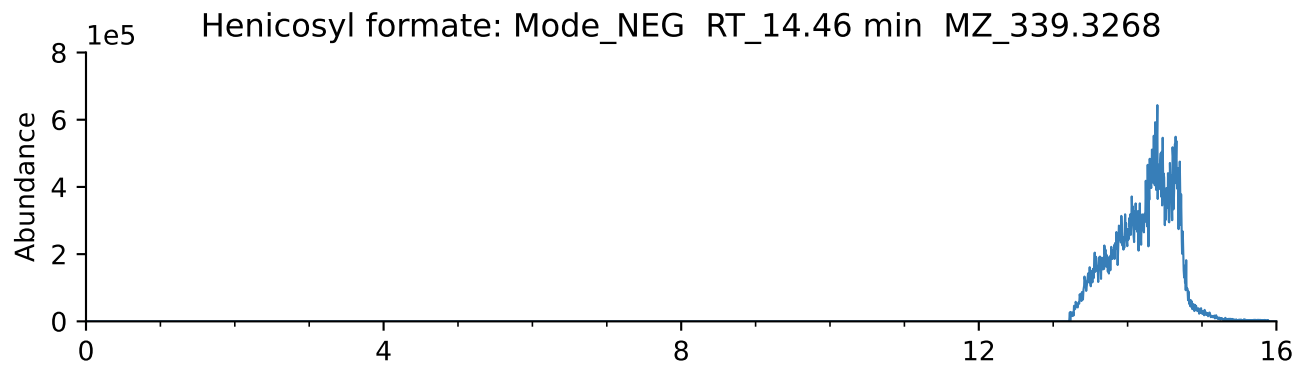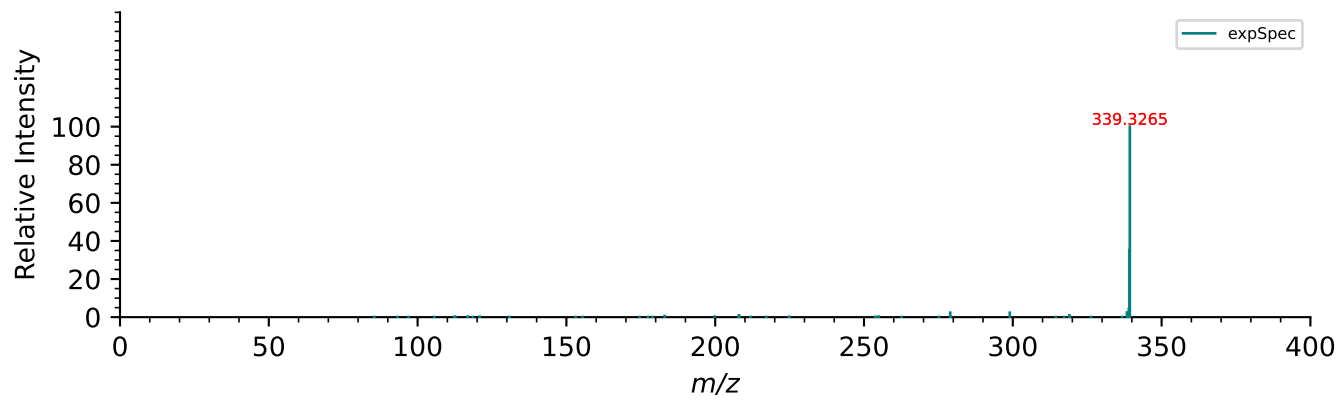

Supplement: identification_of_ingredients.zip [file compound00112.pdf › identification of ingredients/Data analysis/3.mass spectrometry/Original Ingredients/compound00112.pdf]

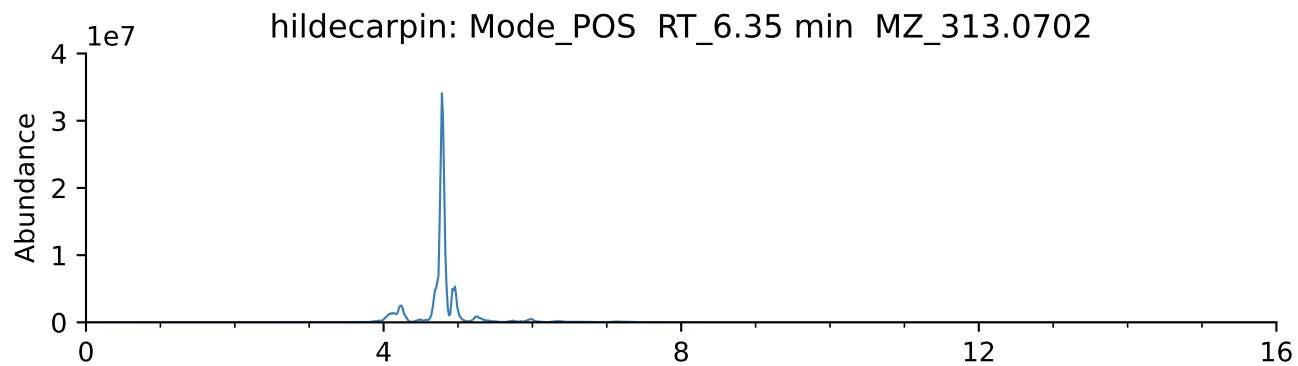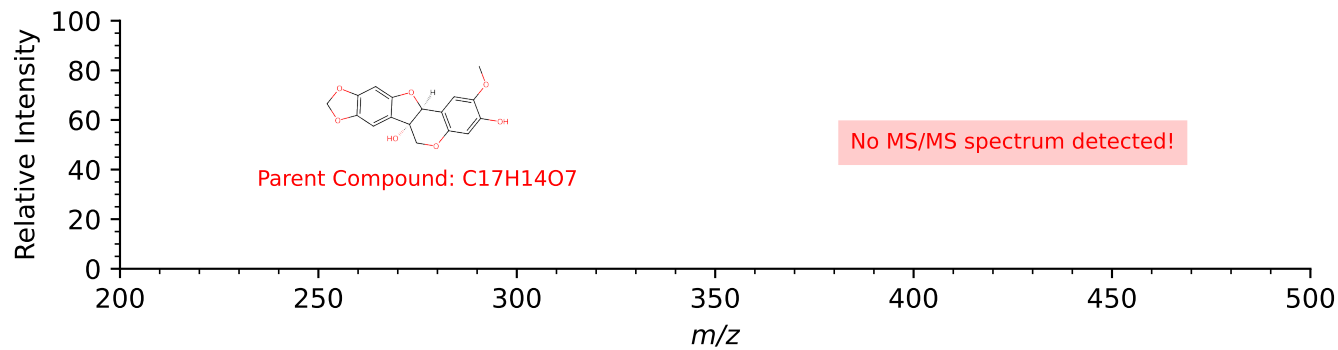

Supplement: identification_of_ingredients.zip [file compound00113.pdf › identification of ingredients/Data analysis/3.mass spectrometry/Original Ingredients/compound00113.pdf]

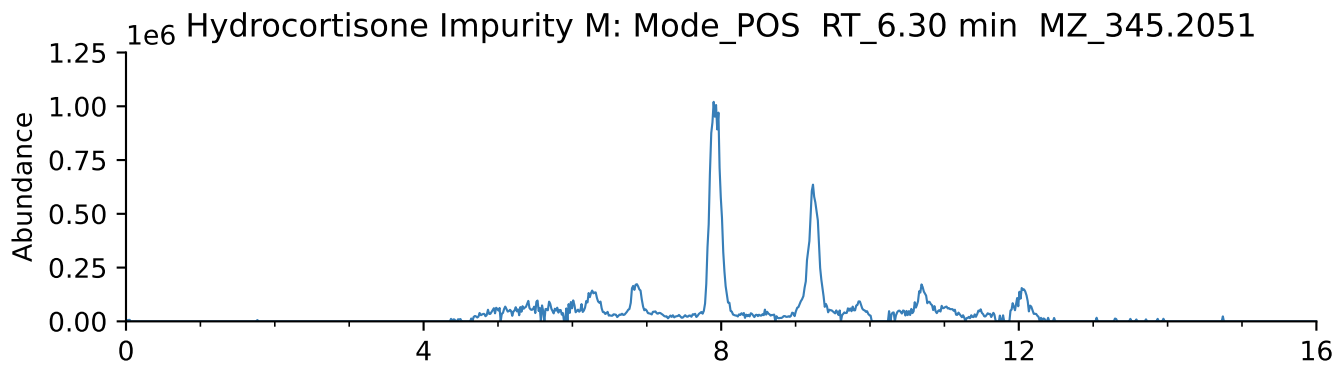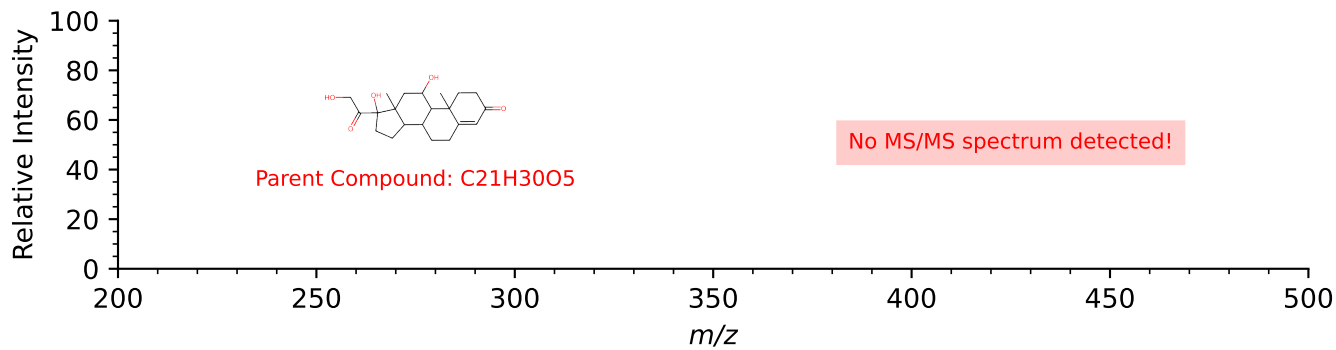

Supplement: identification_of_ingredients.zip [file compound00116.pdf › identification of ingredients/Data analysis/3.mass spectrometry/Original Ingredients/compound00116.pdf]

Isophthalate: Mode\_NEG RT\_3.06 min MZ\_209.0086

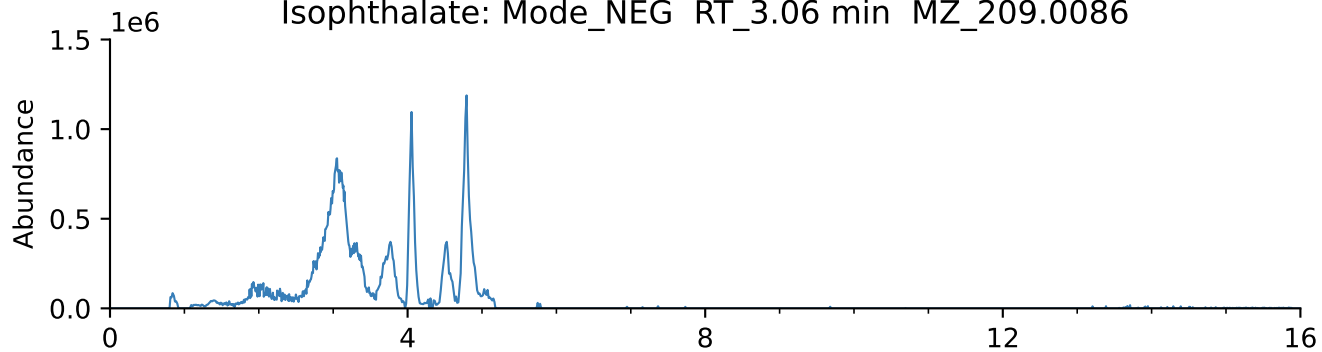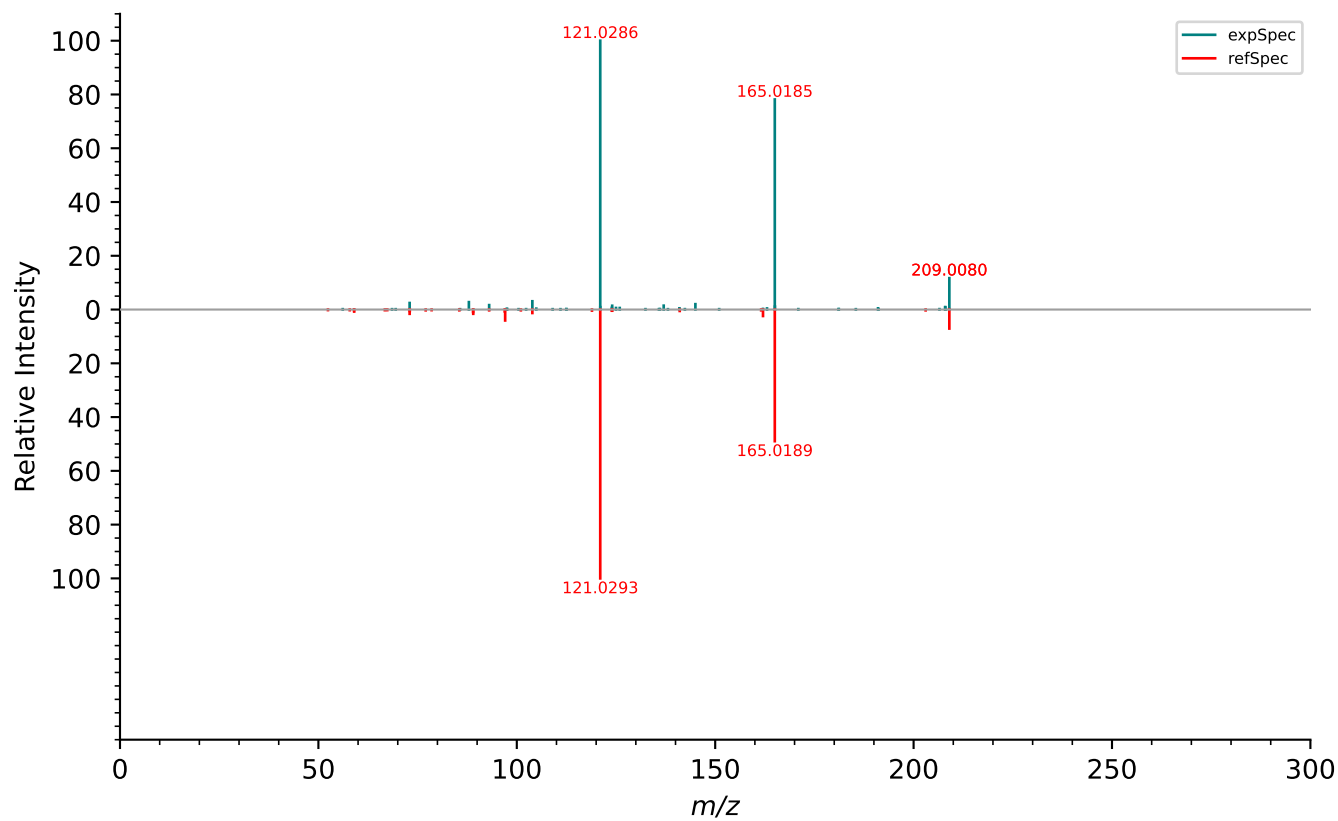

Supplement: identification_of_ingredients.zip [file compound00118.pdf › identification of ingredients/Data analysis/3.mass spectrometry/Original Ingredients/compound00118.pdf]

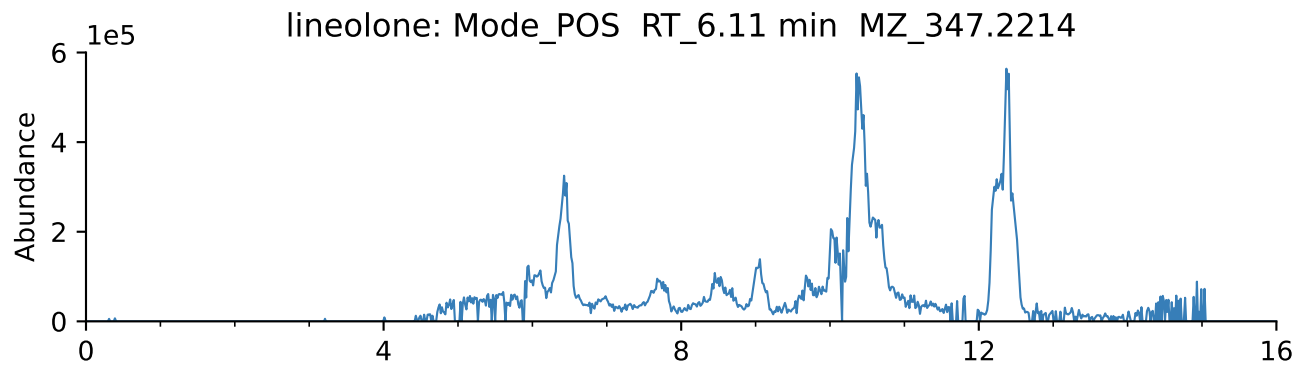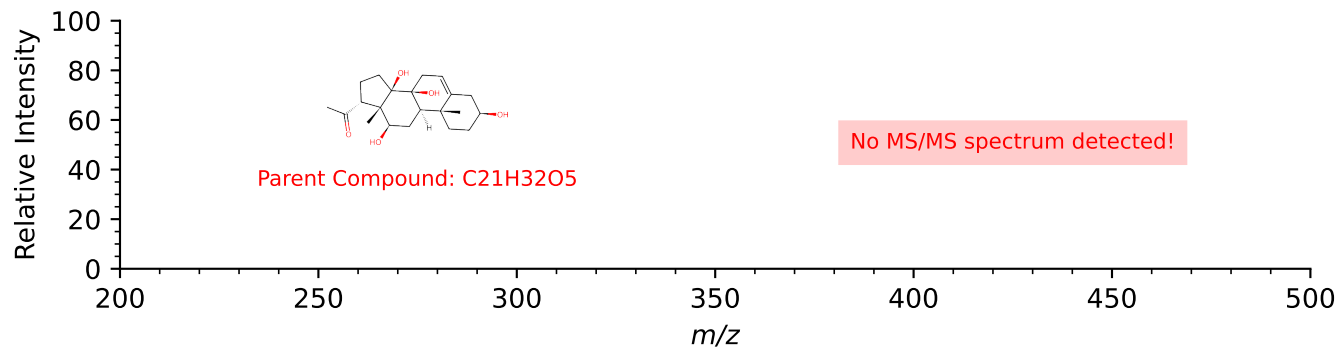

Supplement: identification_of_ingredients.zip [file compound00121.pdf › identification of ingredients/Data analysis/3.mass spectrometry/Original Ingredients/compound00121.pdf]

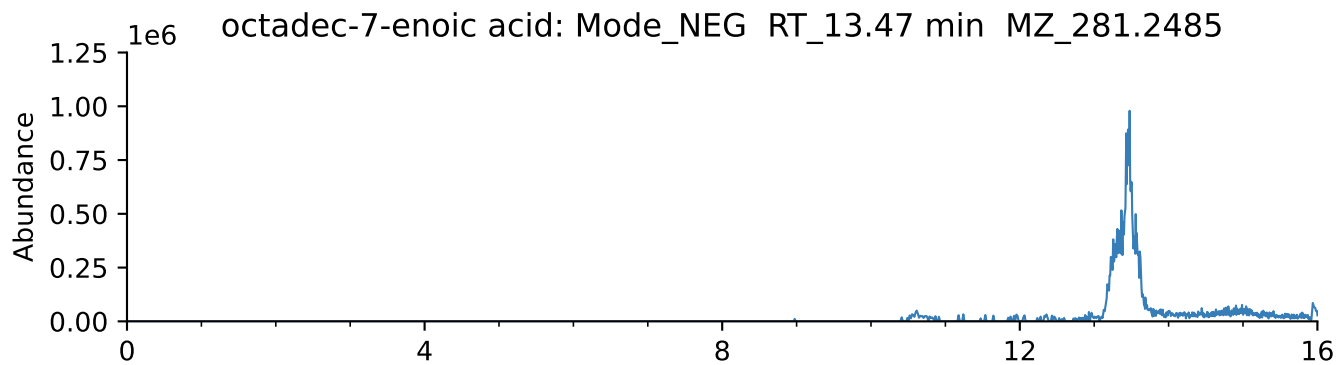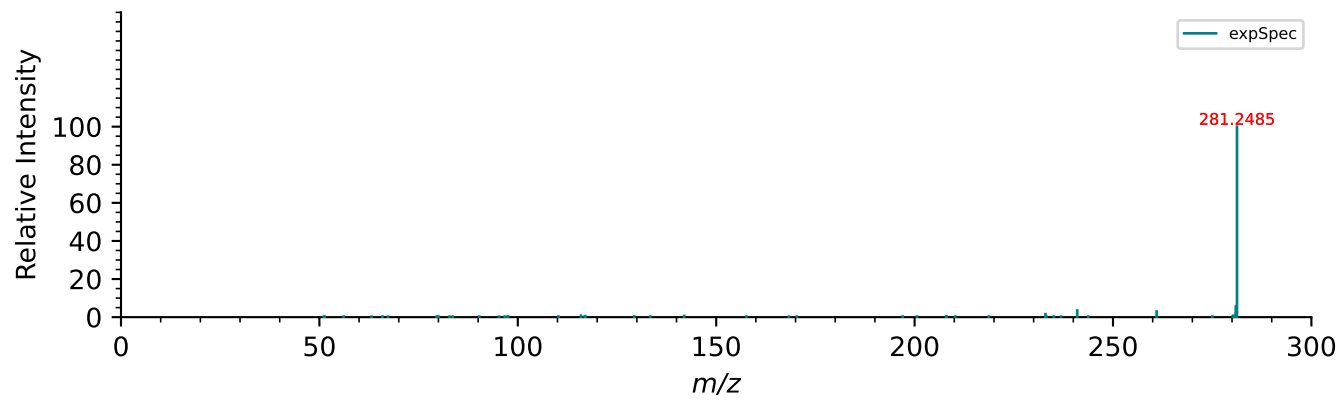

Supplement: identification_of_ingredients.zip [file compound00126.pdf › identification of ingredients/Data analysis/3.mass spectrometry/Original Ingredients/compound00126.pdf]

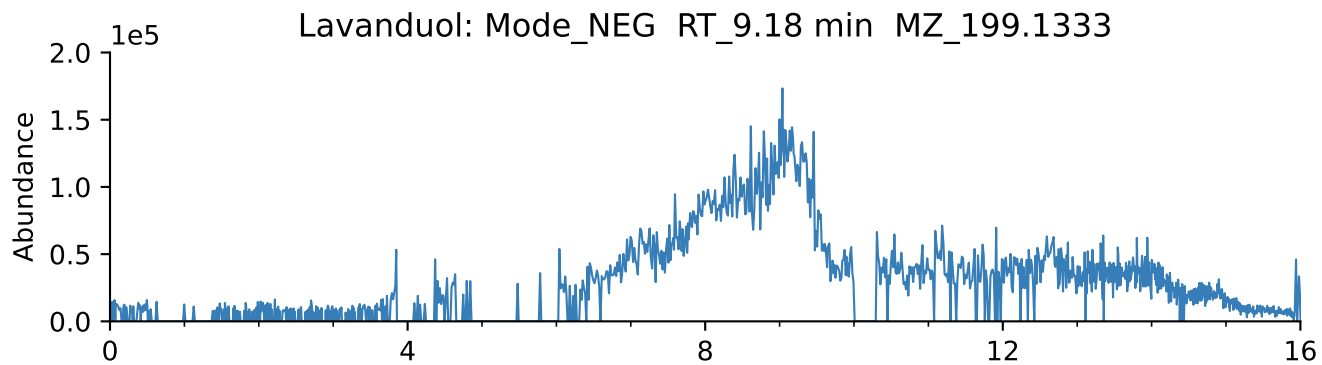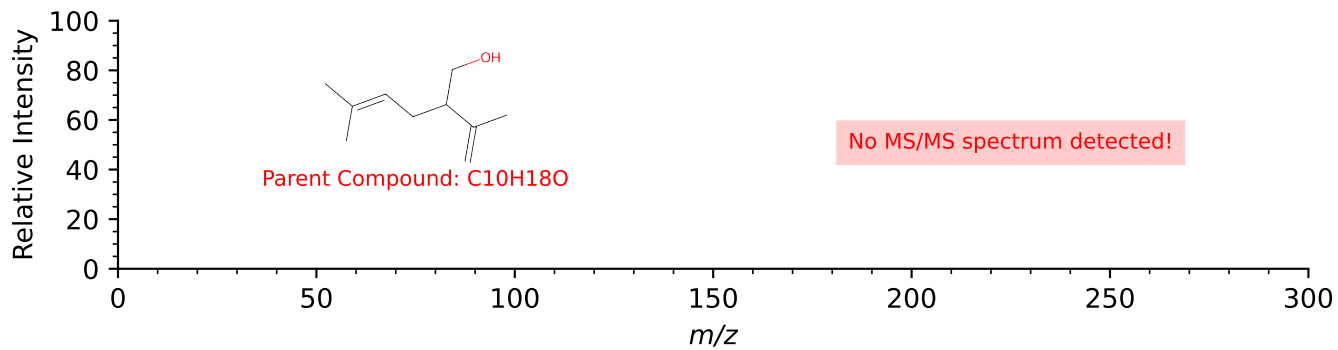

Supplement: identification_of_ingredients.zip [file compound00128.pdf › identification of ingredients/Data analysis/3.mass spectrometry/Original Ingredients/compound00128.pdf]

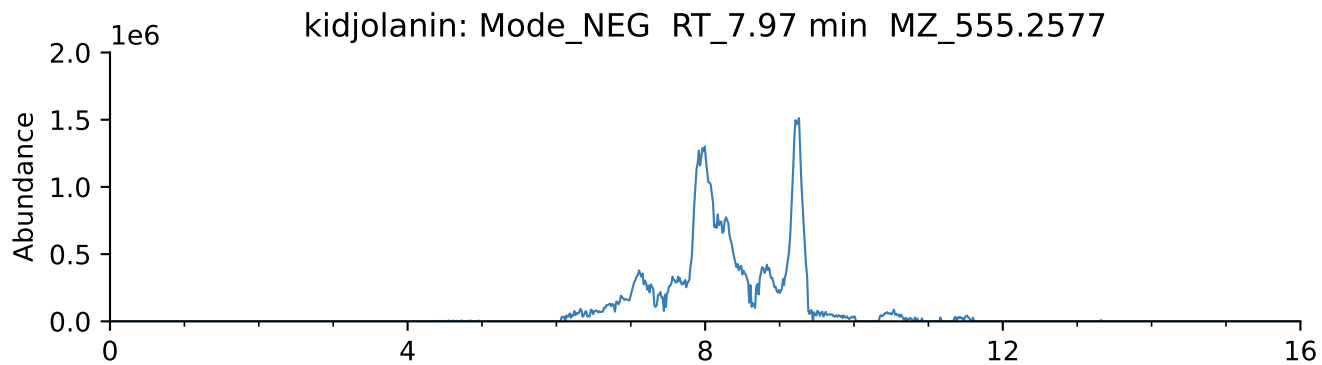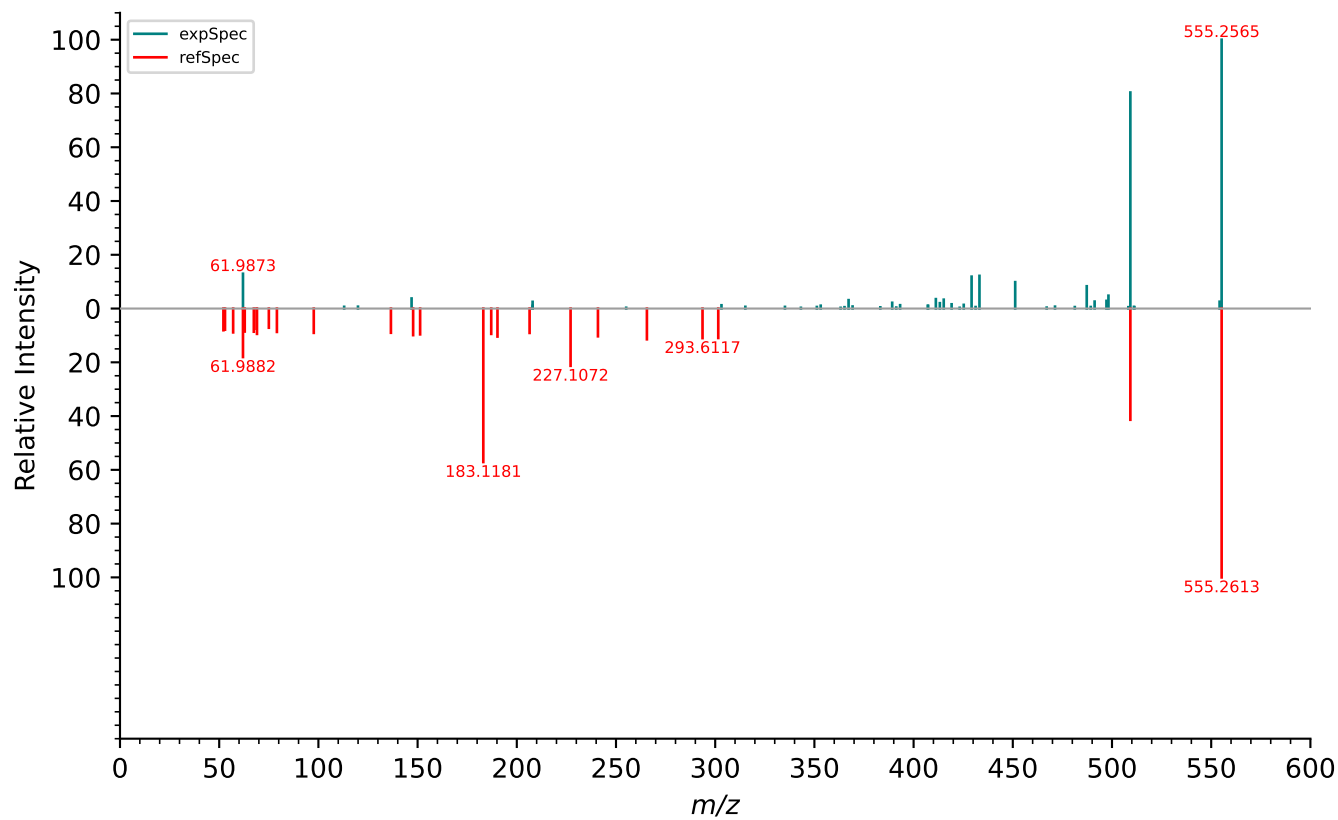

Supplement: identification_of_ingredients.zip [file compound00142.pdf › identification of ingredients/Data analysis/3.mass spectrometry/Original Ingredients/compound00142.pdf]

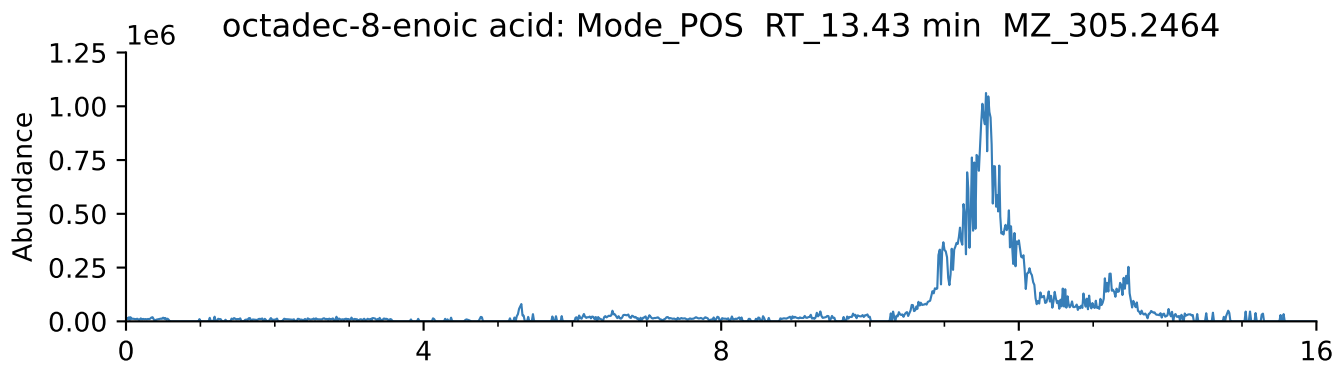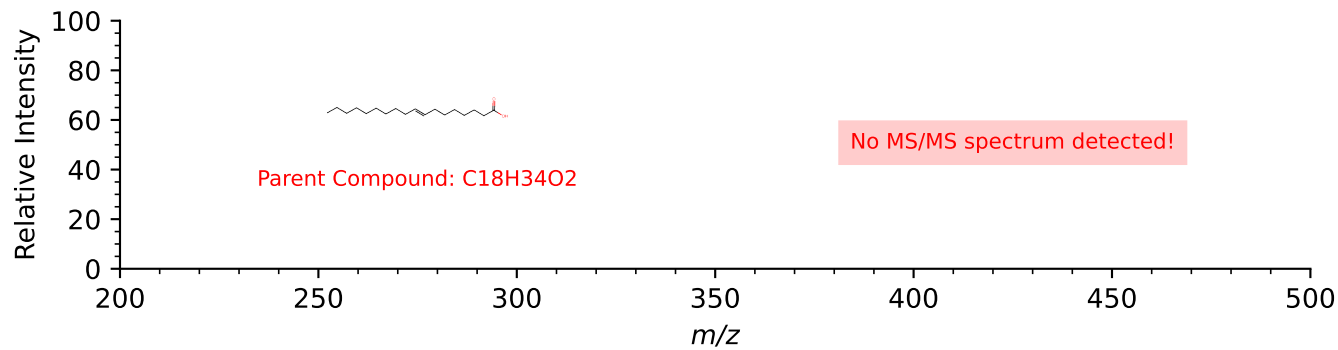

Supplement: identification_of_ingredients.zip [file compound00147.pdf › identification of ingredients/Data analysis/3.mass spectrometry/Original Ingredients/compound00147.pdf]

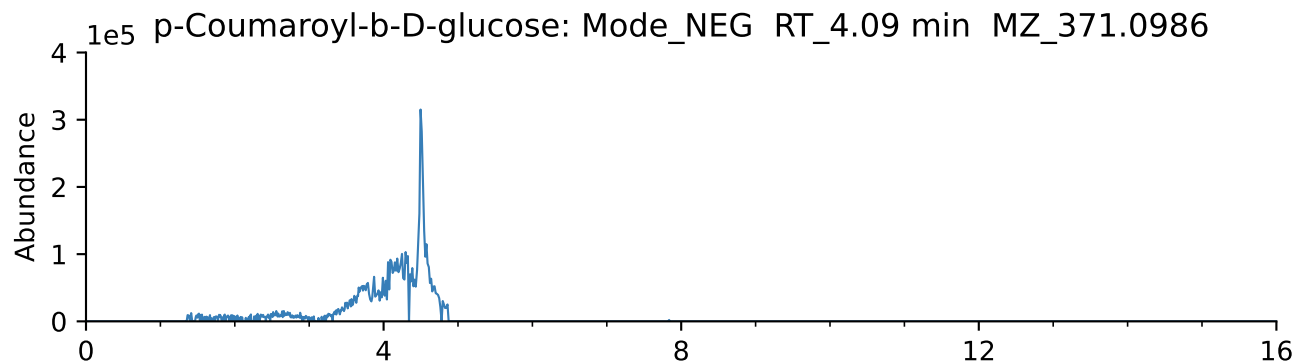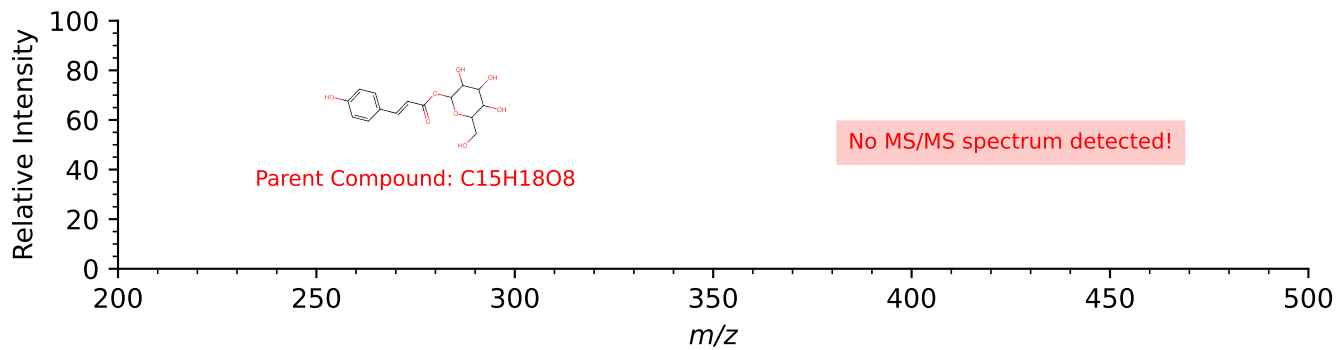

Supplement: identification_of_ingredients.zip [file compound00148.pdf › identification of ingredients/Data analysis/3.mass spectrometry/Original Ingredients/compound00148.pdf]

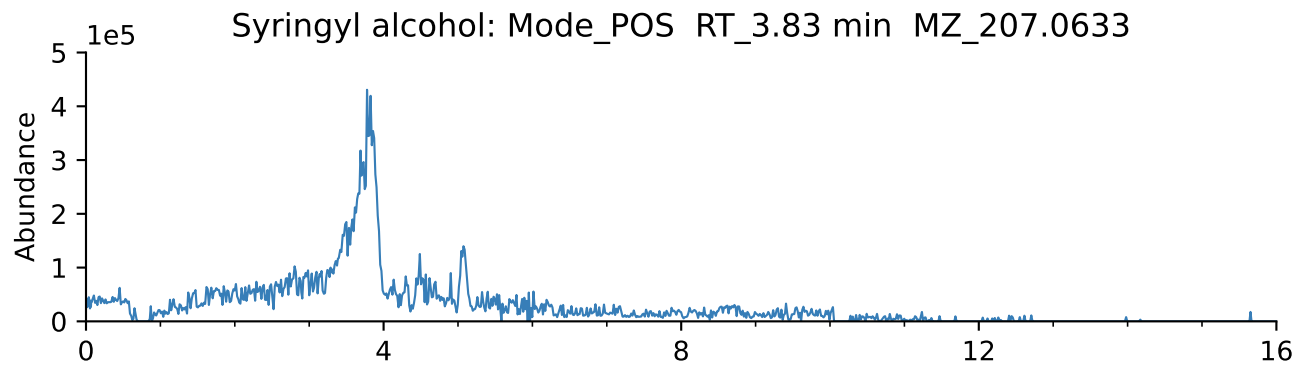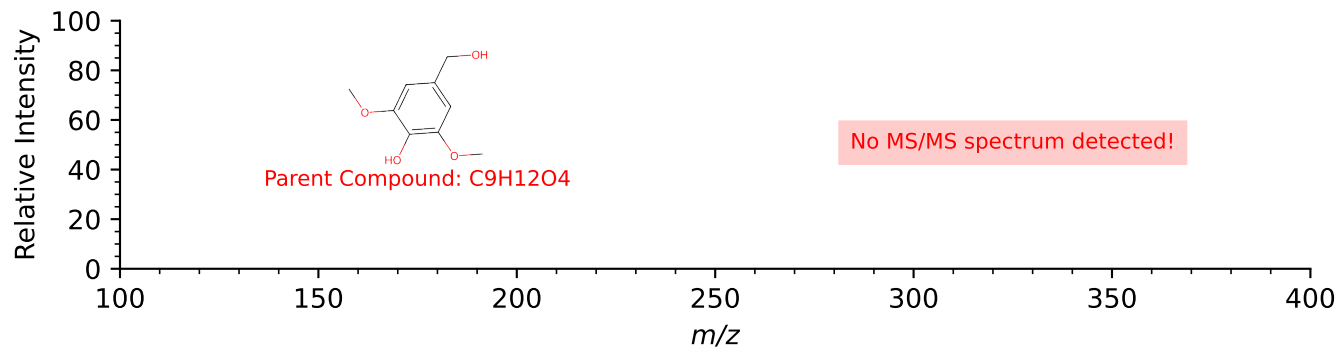

Supplement: identification_of_ingredients.zip [file compound00149.pdf › identification of ingredients/Data analysis/3.mass spectrometry/Original Ingredients/compound00149.pdf]

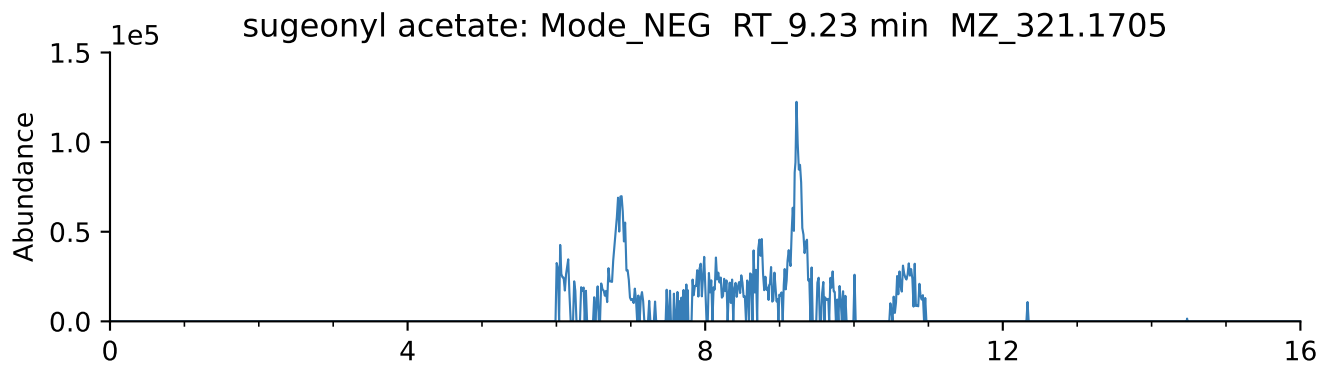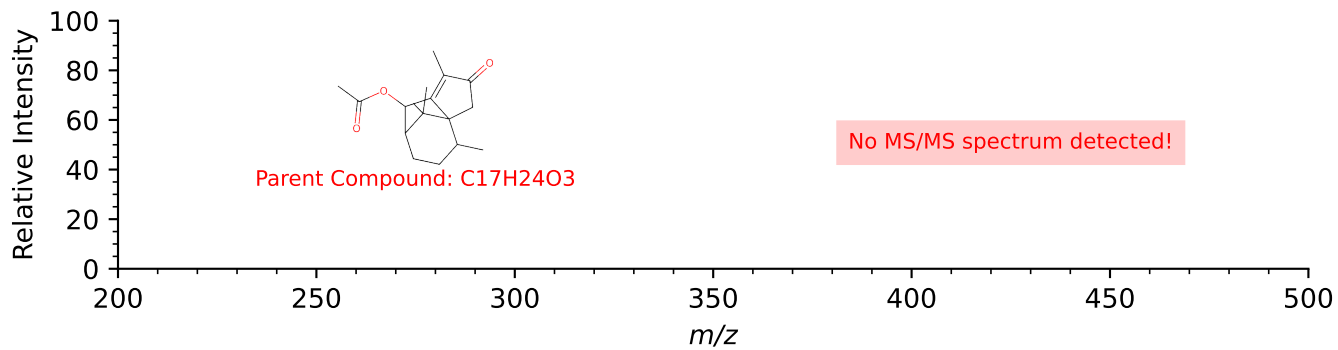

Supplement: identification_of_ingredients.zip [file compound00154.pdf › identification of ingredients/Data analysis/3.mass spectrometry/Original Ingredients/compound00154.pdf]

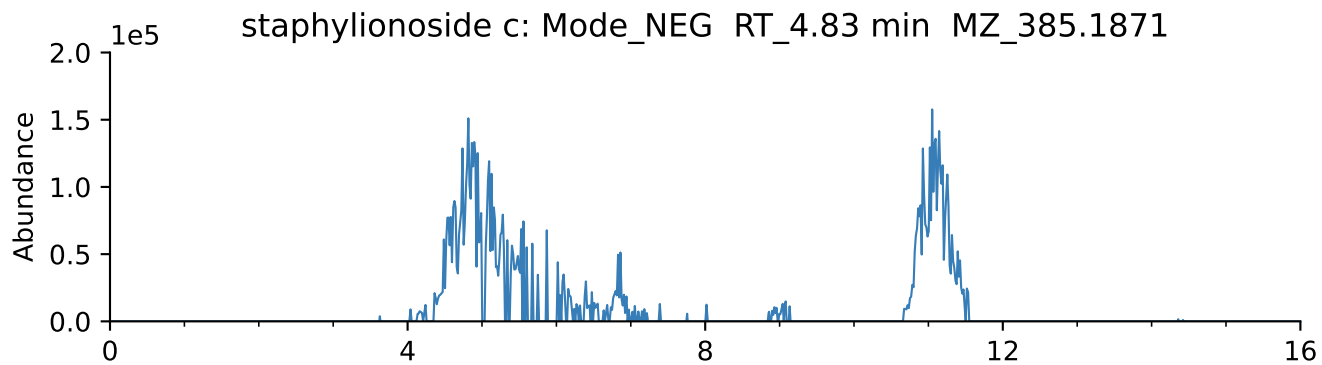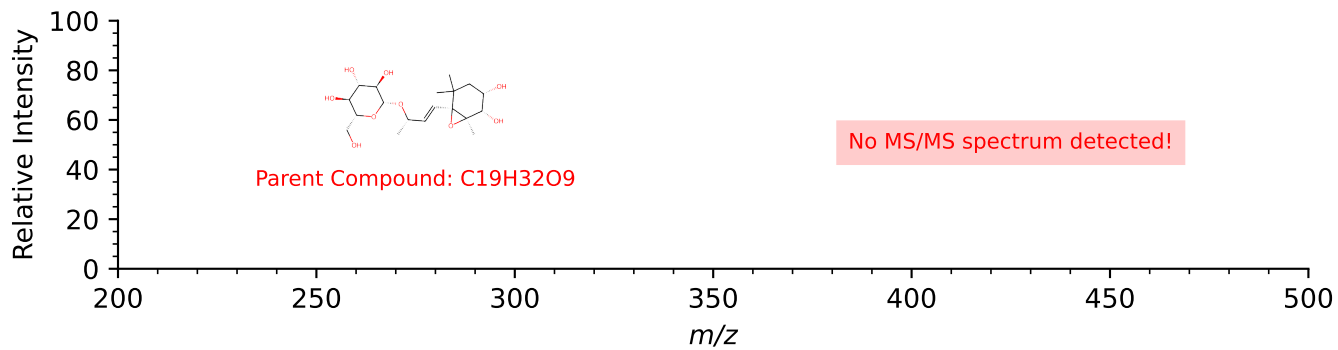

Supplement: identification_of_ingredients.zip [file compound00156.pdf › identification of ingredients/Data analysis/3.mass spectrometry/Original Ingredients/compound00156.pdf]

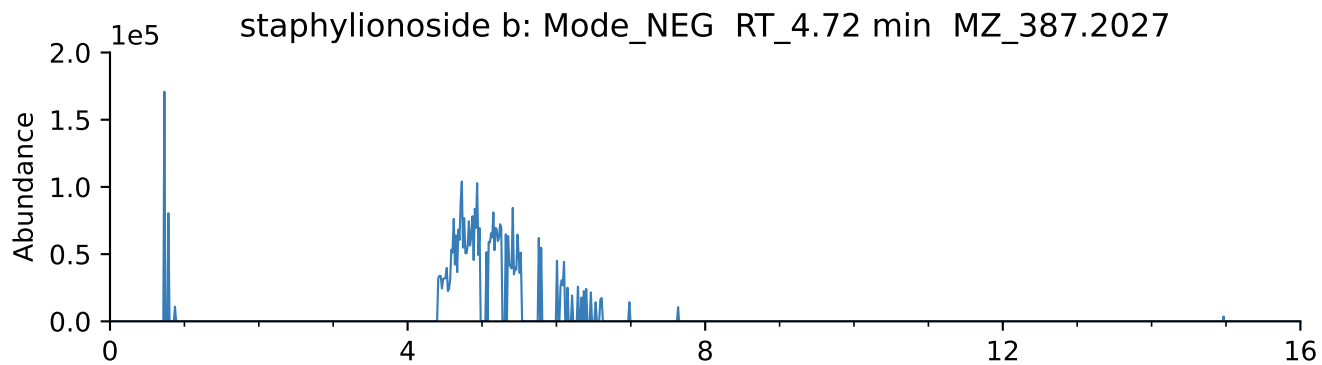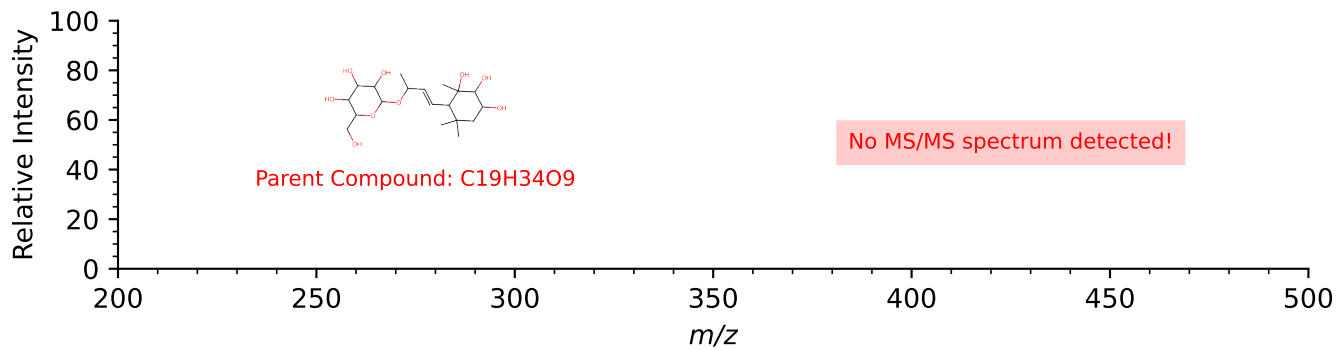

Supplement: identification_of_ingredients.zip [file compound00157.pdf › identification of ingredients/Data analysis/3.mass spectrometry/Original Ingredients/compound00157.pdf]

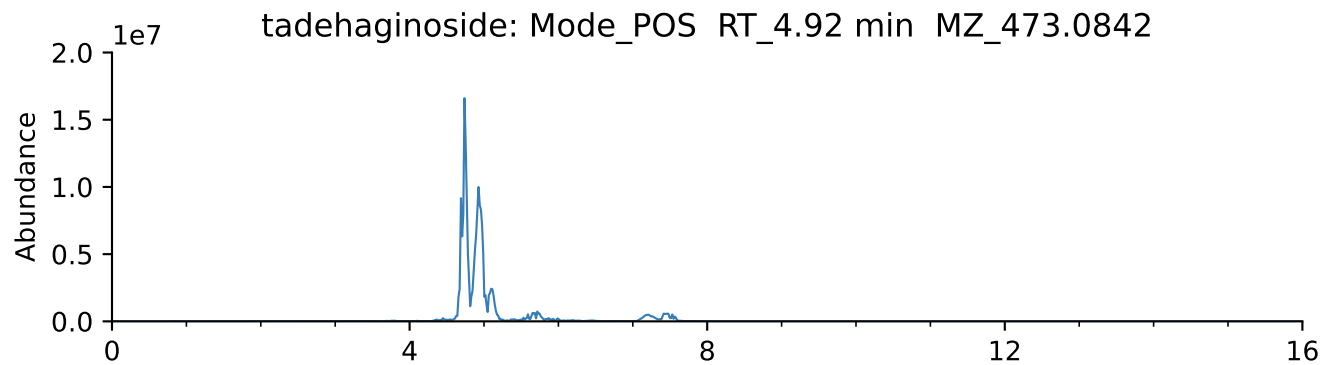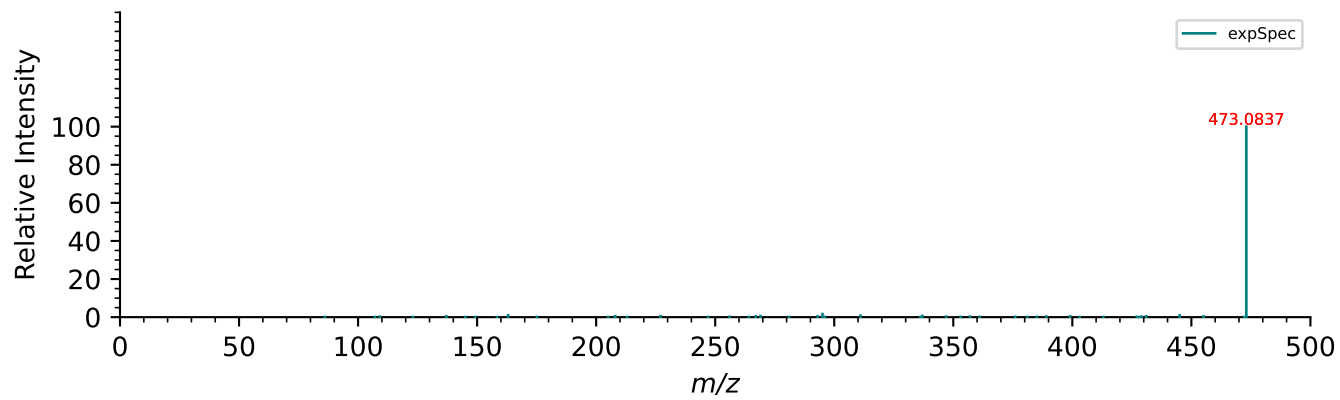

Supplement: identification_of_ingredients.zip [file compound00159.pdf › identification of ingredients/Data analysis/3.mass spectrometry/Original Ingredients/compound00159.pdf]

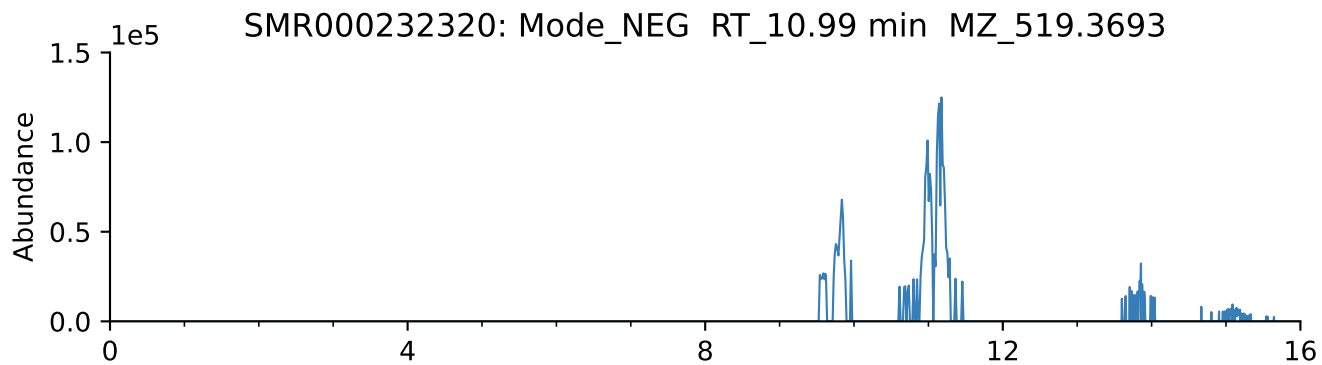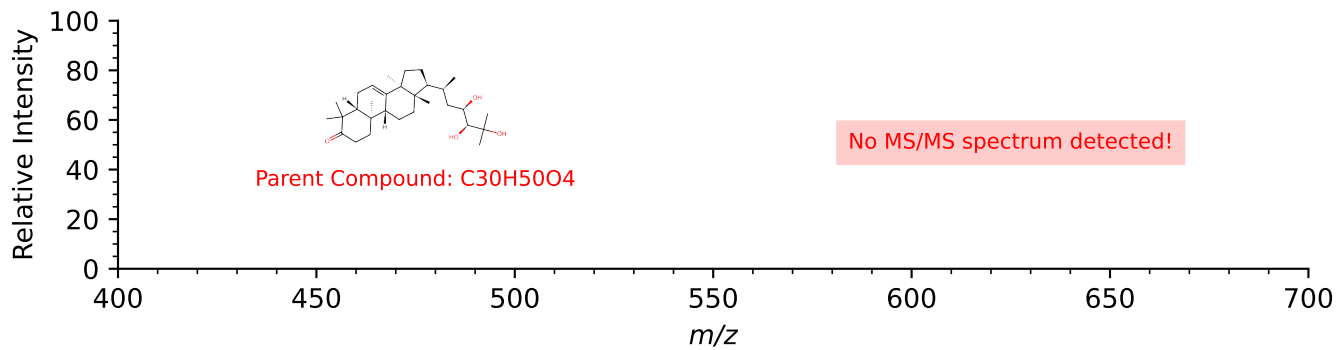

Supplement: identification_of_ingredients.zip [file compound00162.pdf › identification of ingredients/Data analysis/3.mass spectrometry/Original Ingredients/compound00162.pdf]

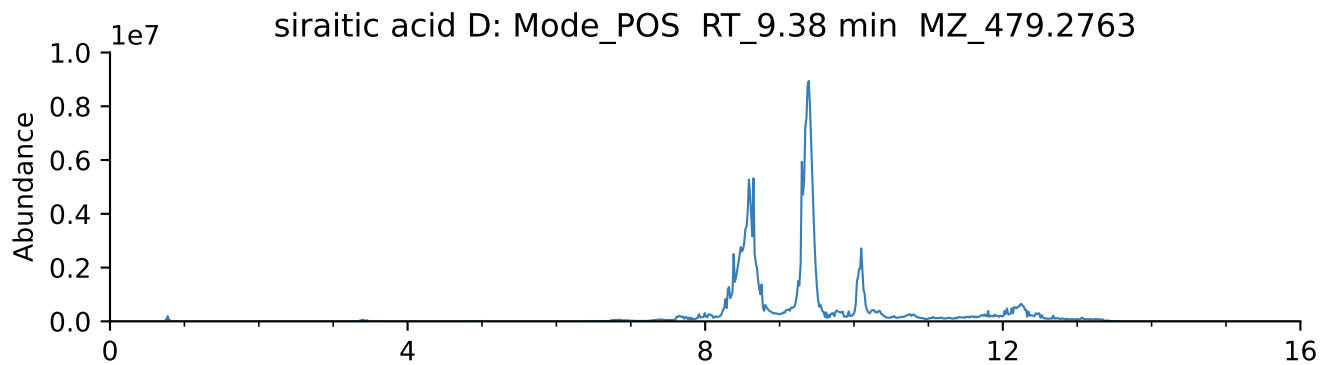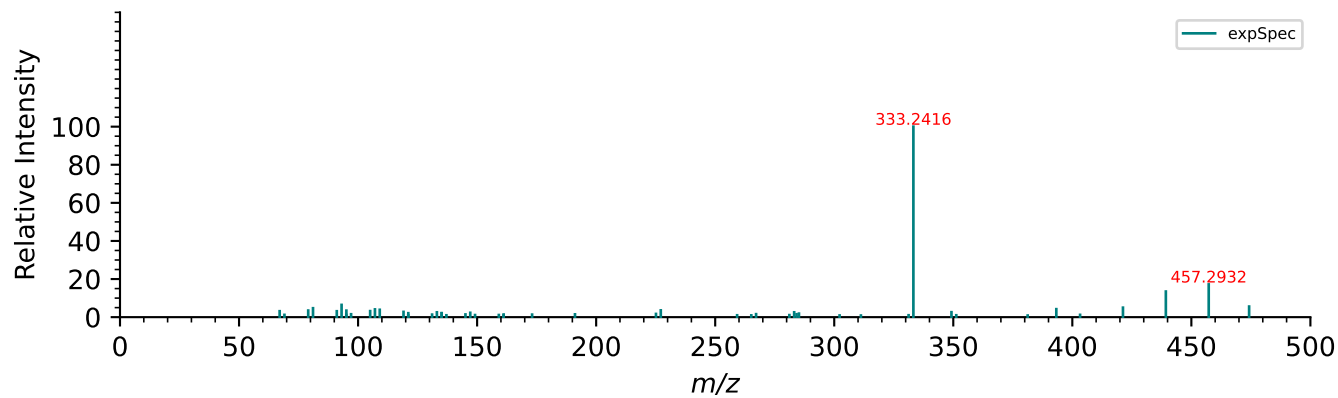

Supplement: identification_of_ingredients.zip [file compound00164.pdf › identification of ingredients/Data analysis/3.mass spectrometry/Original Ingredients/compound00164.pdf]

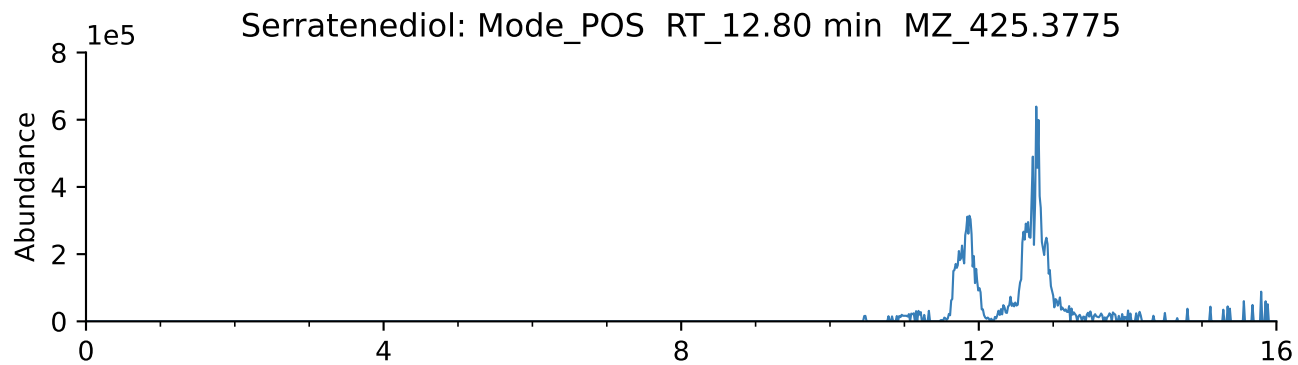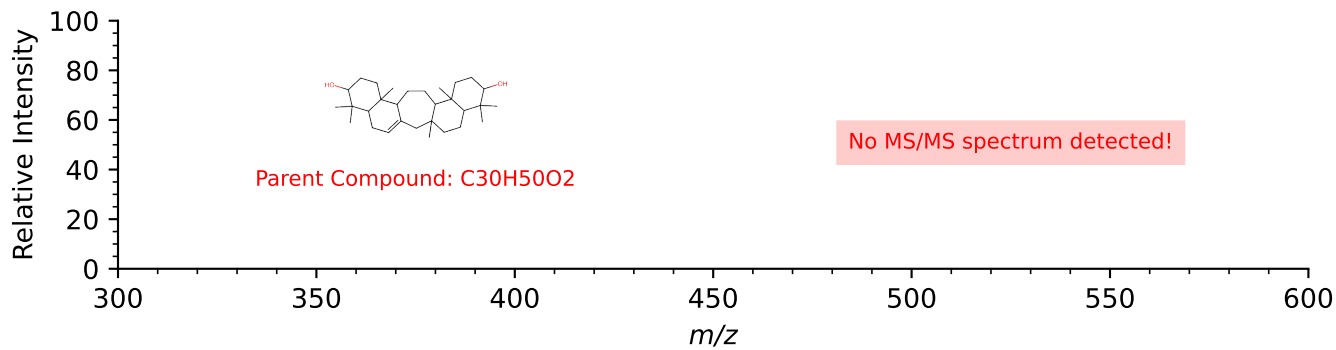

Supplement: identification_of_ingredients.zip [file compound00167.pdf › identification of ingredients/Data analysis/3.mass spectrometry/Original Ingredients/compound00167.pdf]

Senkyunolide G: Mode\_NEG RT\_7.97 min MZ\_207.1020

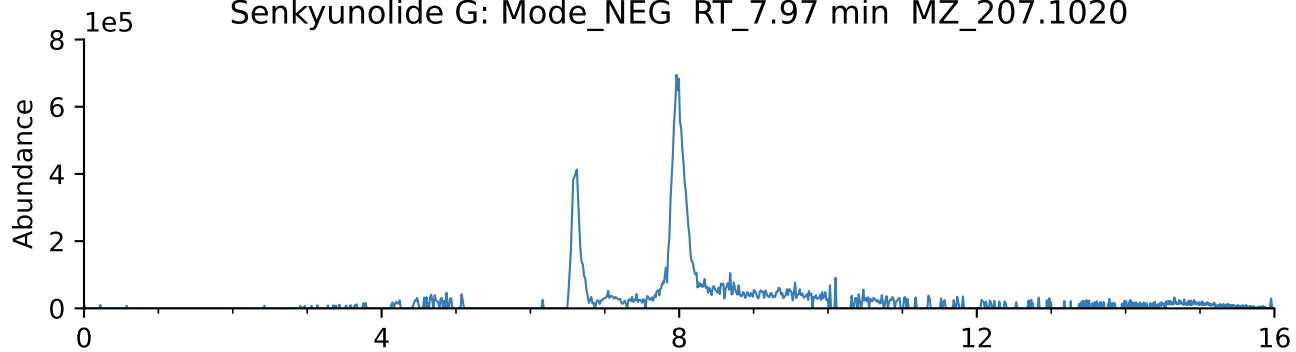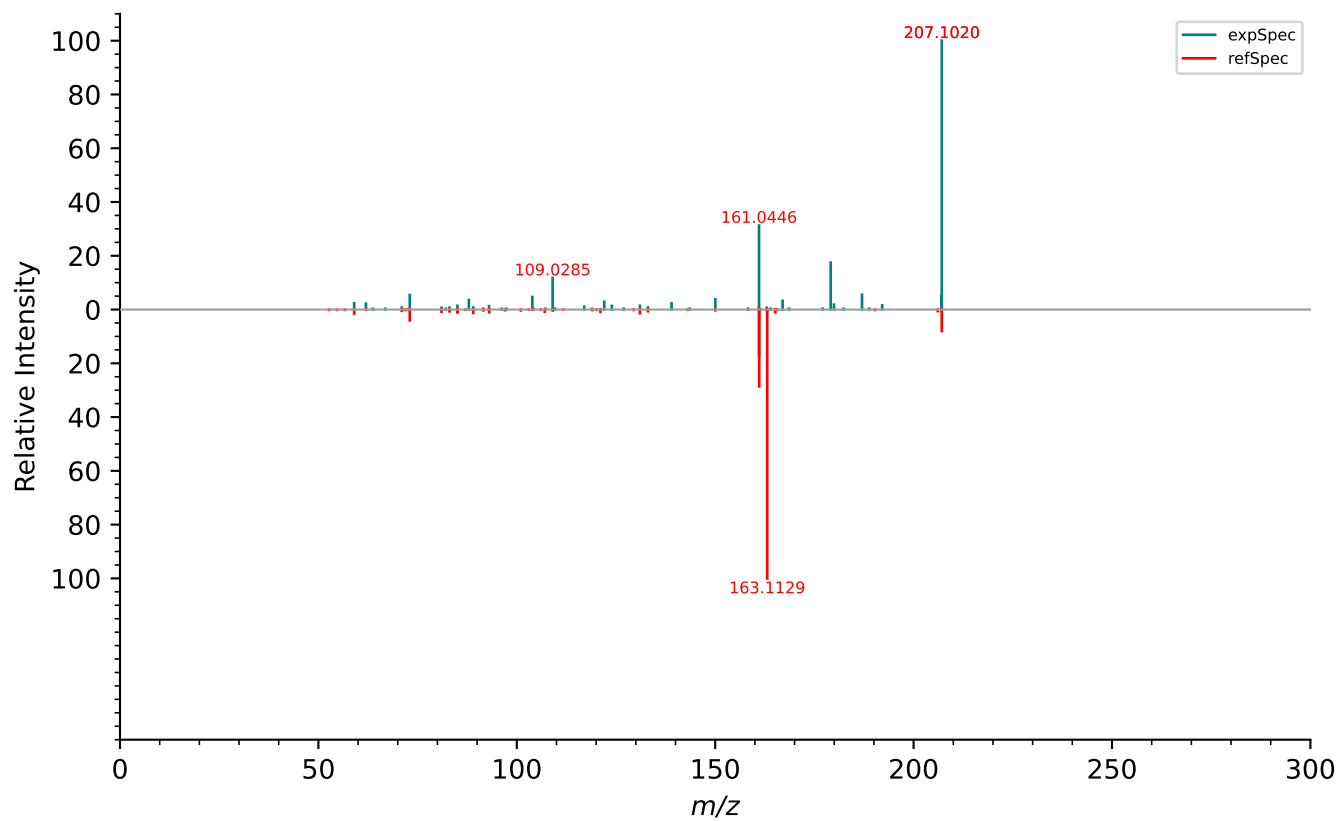

Supplement: identification_of_ingredients.zip [file compound00168.pdf › identification of ingredients/Data analysis/3.mass spectrometry/Original Ingredients/compound00168.pdf]

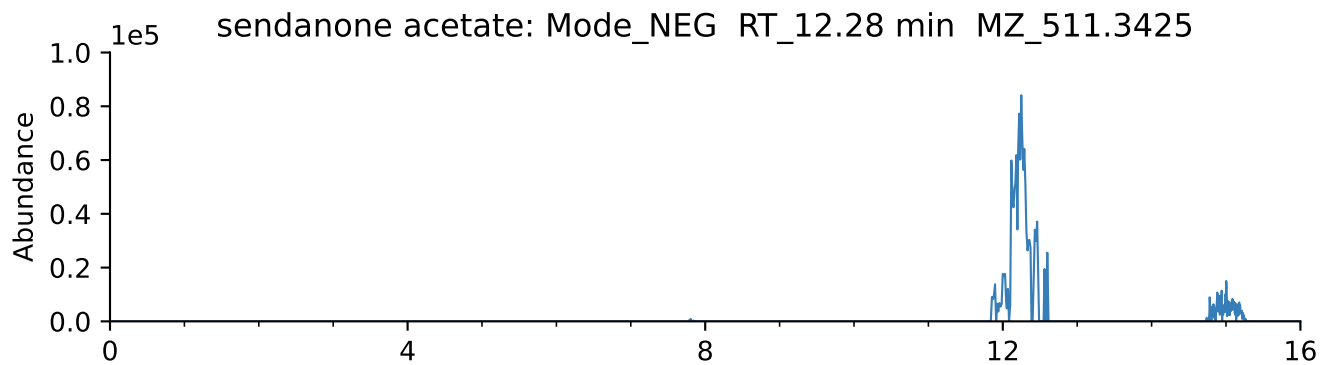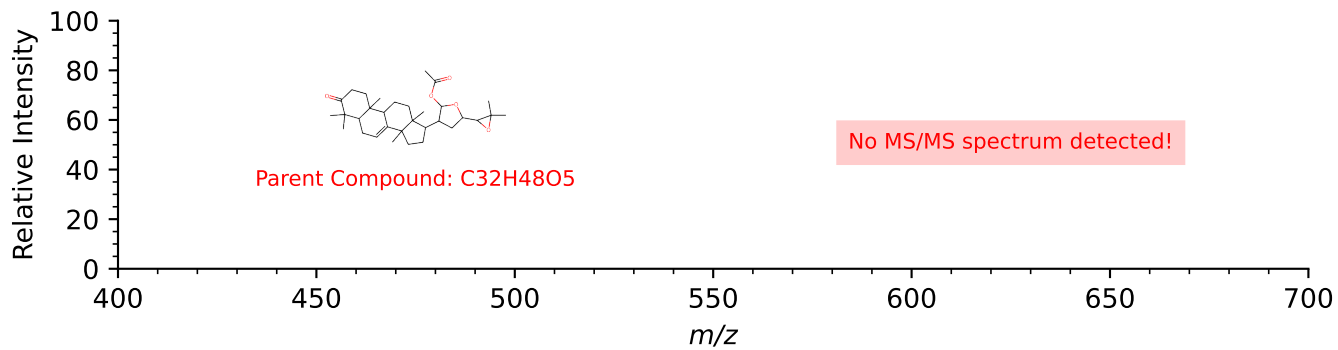

Supplement: identification_of_ingredients.zip [file compound00169.pdf › identification of ingredients/Data analysis/3.mass spectrometry/Original Ingredients/compound00169.pdf]

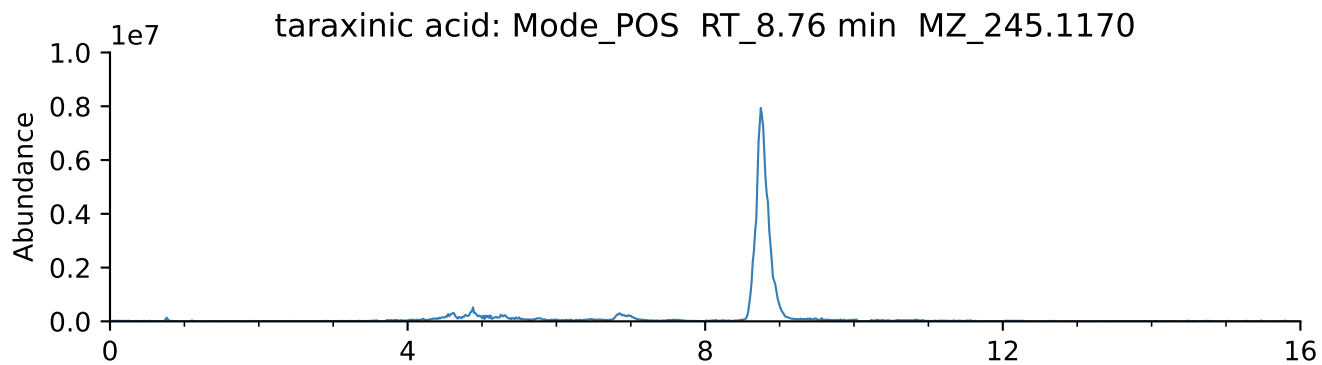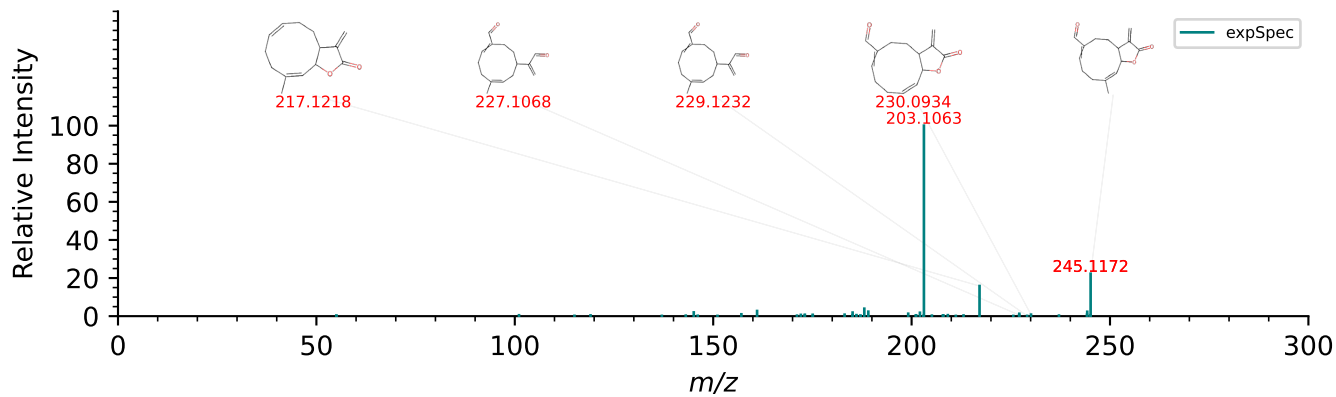

Supplement: identification_of_ingredients.zip [file compound00173.pdf › identification of ingredients/Data analysis/3.mass spectrometry/Original Ingredients/compound00173.pdf]

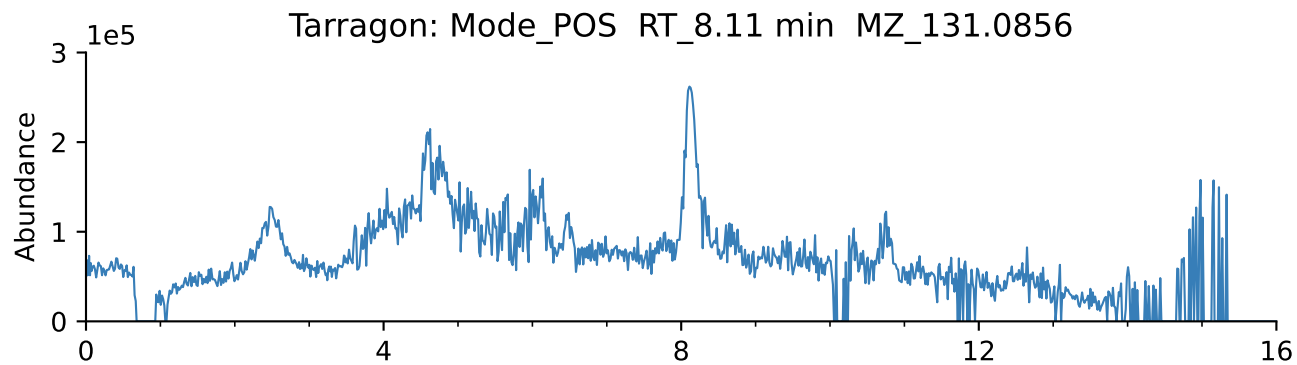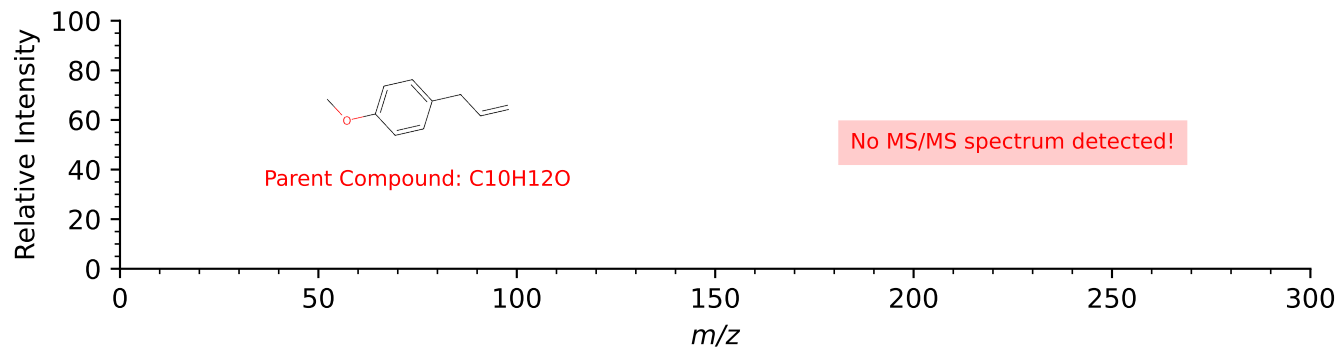

Supplement: identification_of_ingredients.zip [file compound00174.pdf › identification of ingredients/Data analysis/3.mass spectrometry/Original Ingredients/compound00174.pdf]

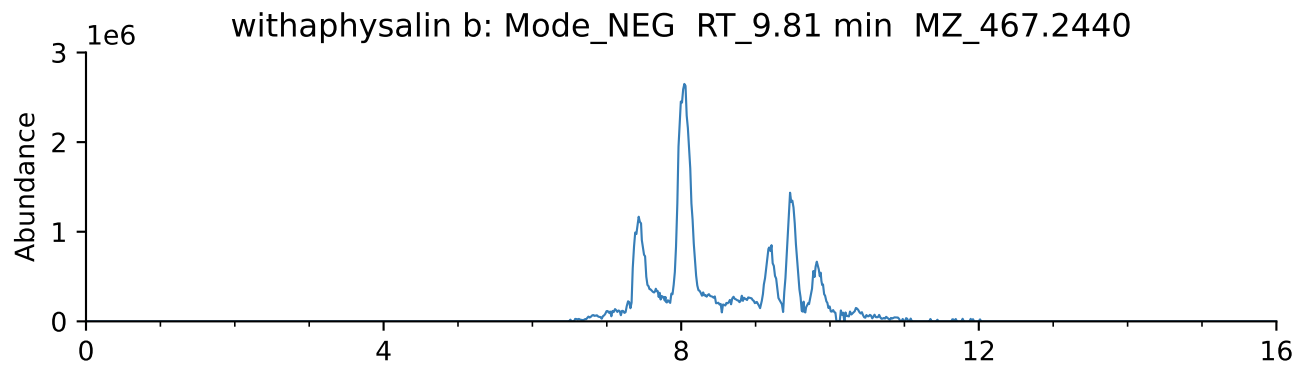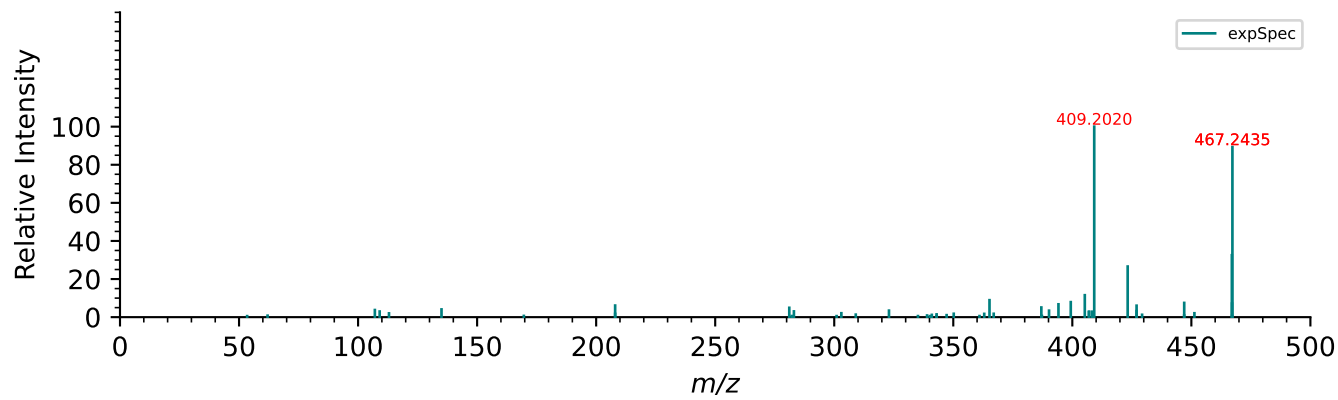

Supplement: identification_of_ingredients.zip [file compound00178.pdf › identification of ingredients/Data analysis/3.mass spectrometry/Original Ingredients/compound00178.pdf]

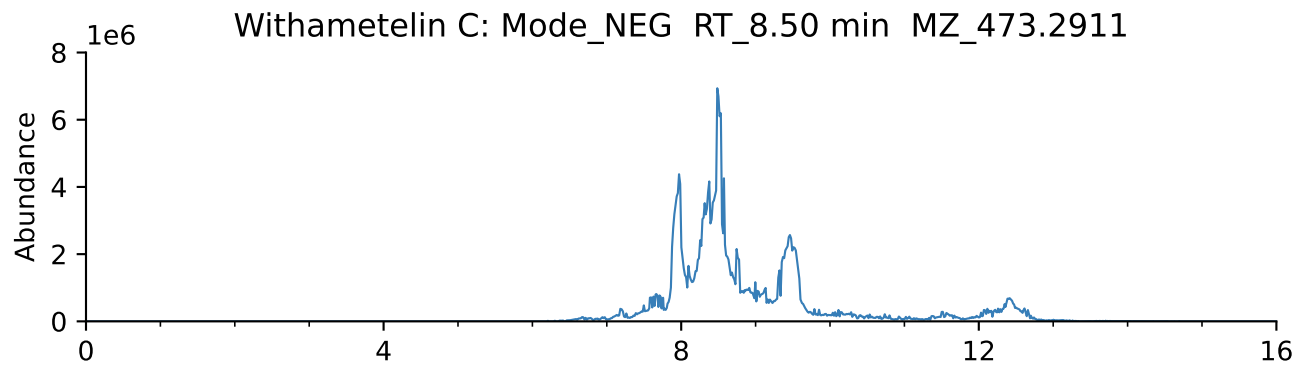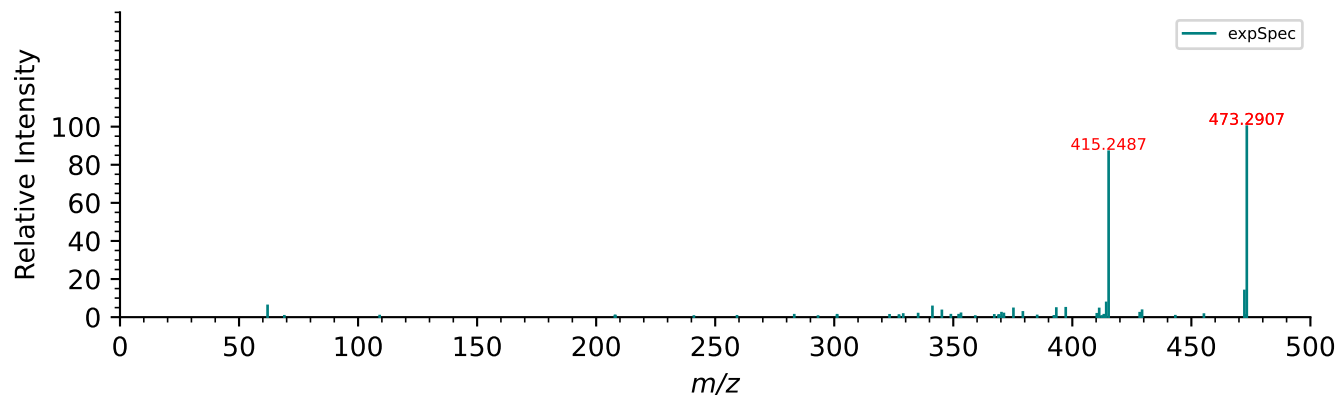

Supplement: identification_of_ingredients.zip [file compound00179.pdf › identification of ingredients/Data analysis/3.mass spectrometry/Original Ingredients/compound00179.pdf]

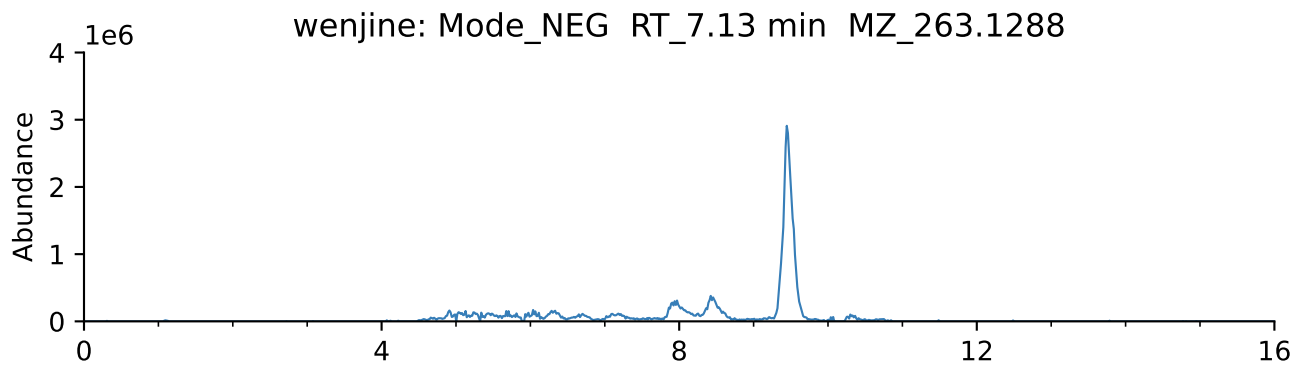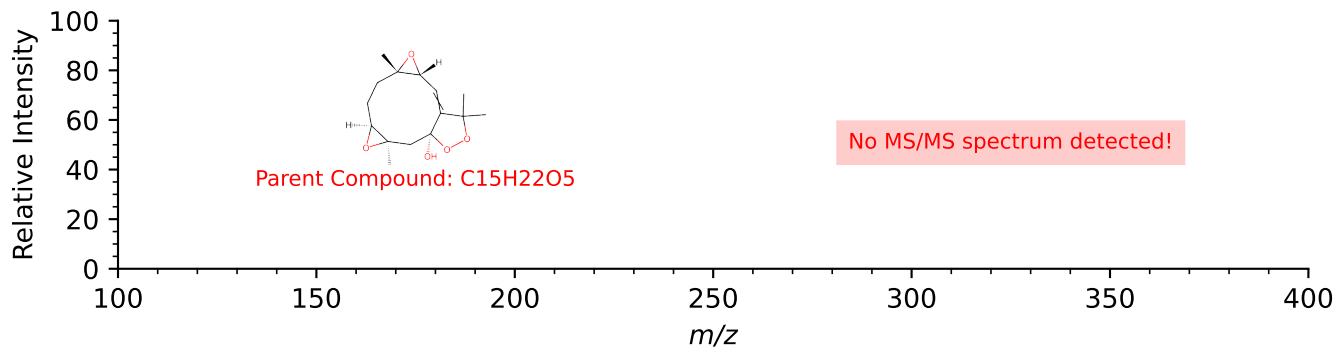

Supplement: identification_of_ingredients.zip [file compound00181.pdf › identification of ingredients/Data analysis/3.mass spectrometry/Original Ingredients/compound00181.pdf]

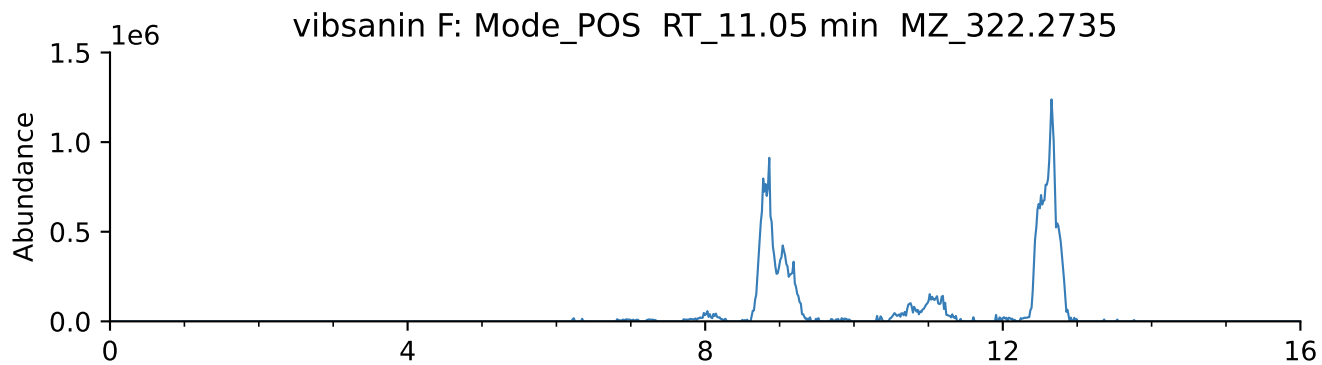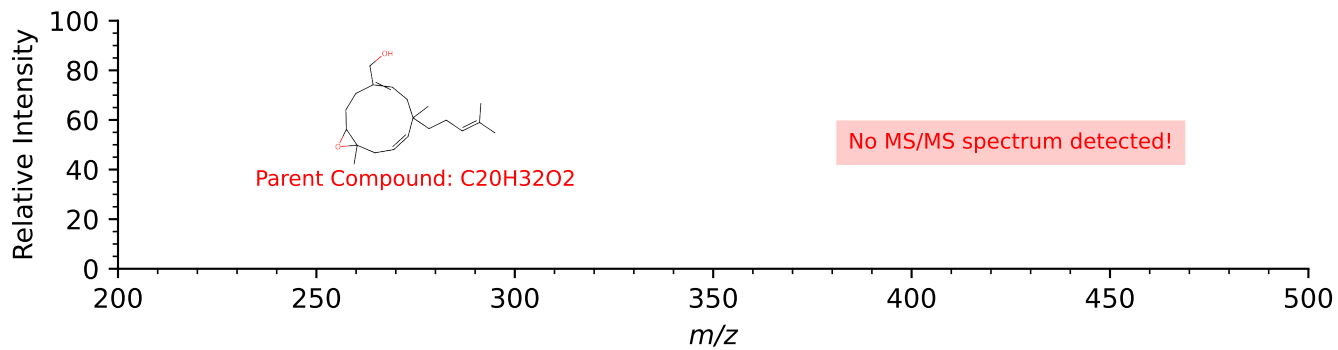

Supplement: identification_of_ingredients.zip [file compound00183.pdf › identification of ingredients/Data analysis/3.mass spectrometry/Original Ingredients/compound00183.pdf]

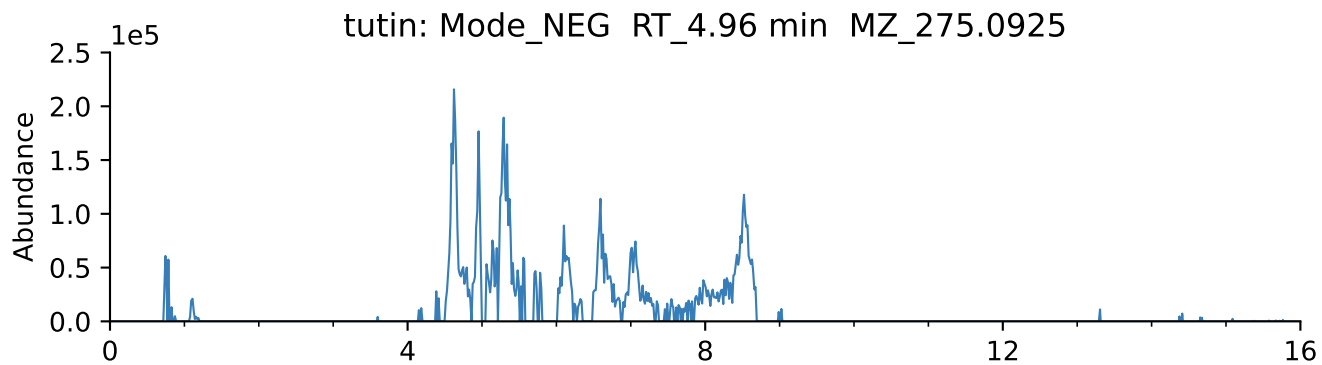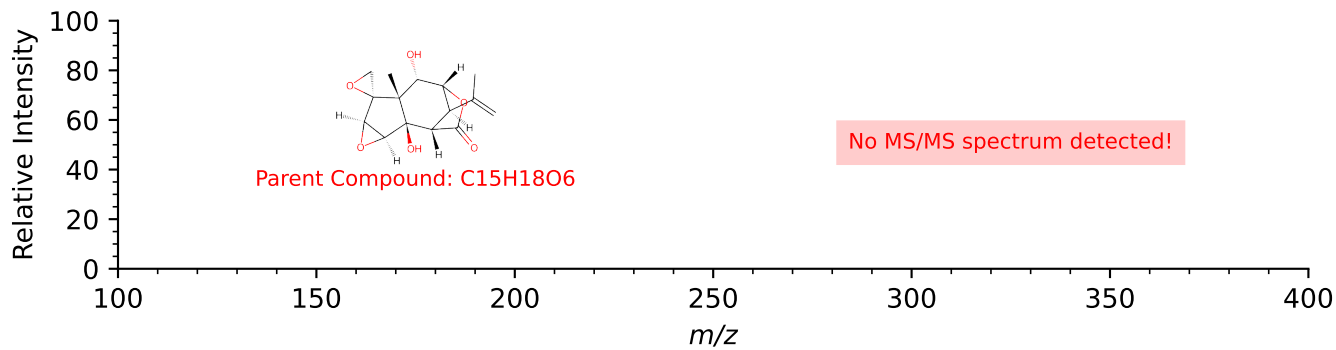

Supplement: identification_of_ingredients.zip [file compound00186.pdf › identification of ingredients/Data analysis/3.mass spectrometry/Original Ingredients/compound00186.pdf]

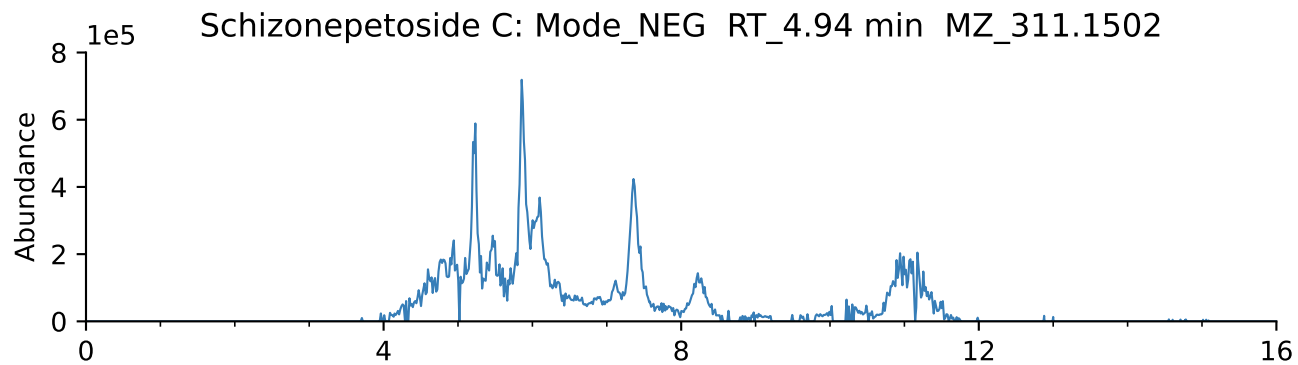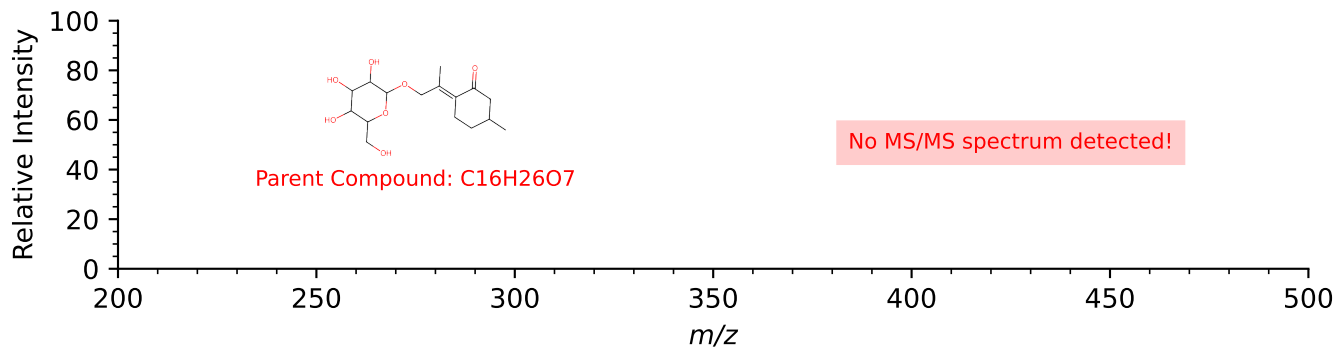

Supplement: identification_of_ingredients.zip [file compound00203.pdf › identification of ingredients/Data analysis/3.mass spectrometry/Original Ingredients/compound00203.pdf]

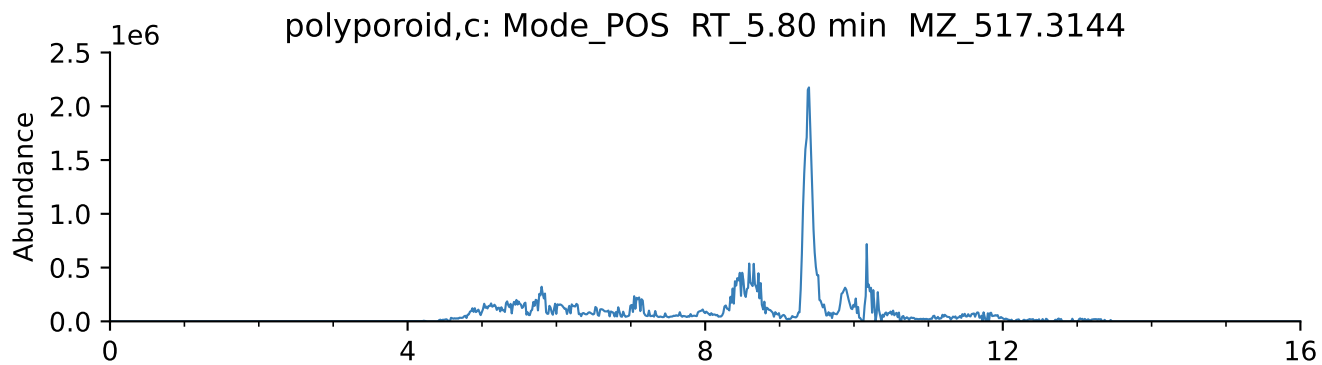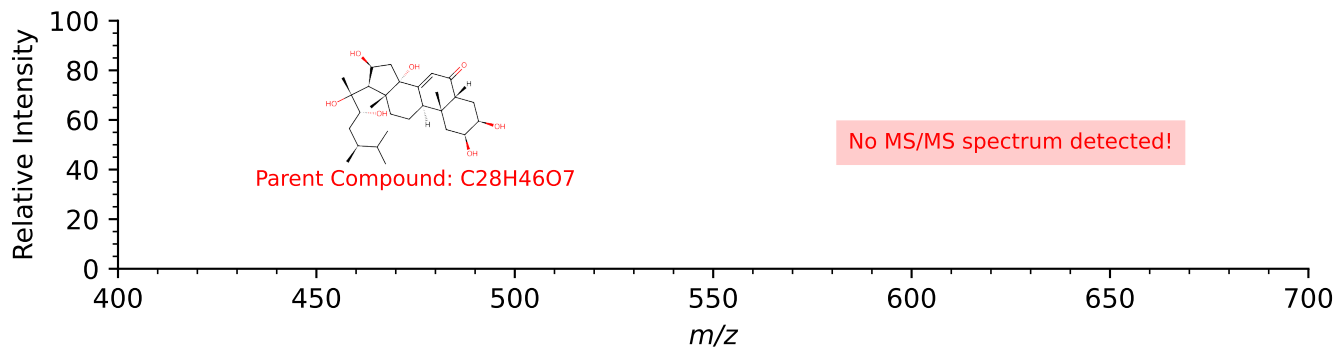

Supplement: identification_of_ingredients.zip [file compound00206.pdf › identification of ingredients/Data analysis/3.mass spectrometry/Original Ingredients/compound00206.pdf]

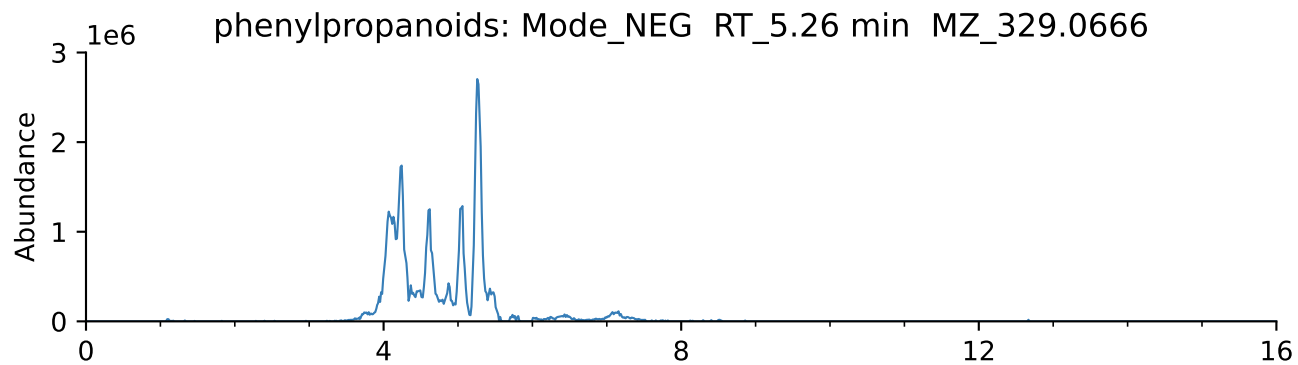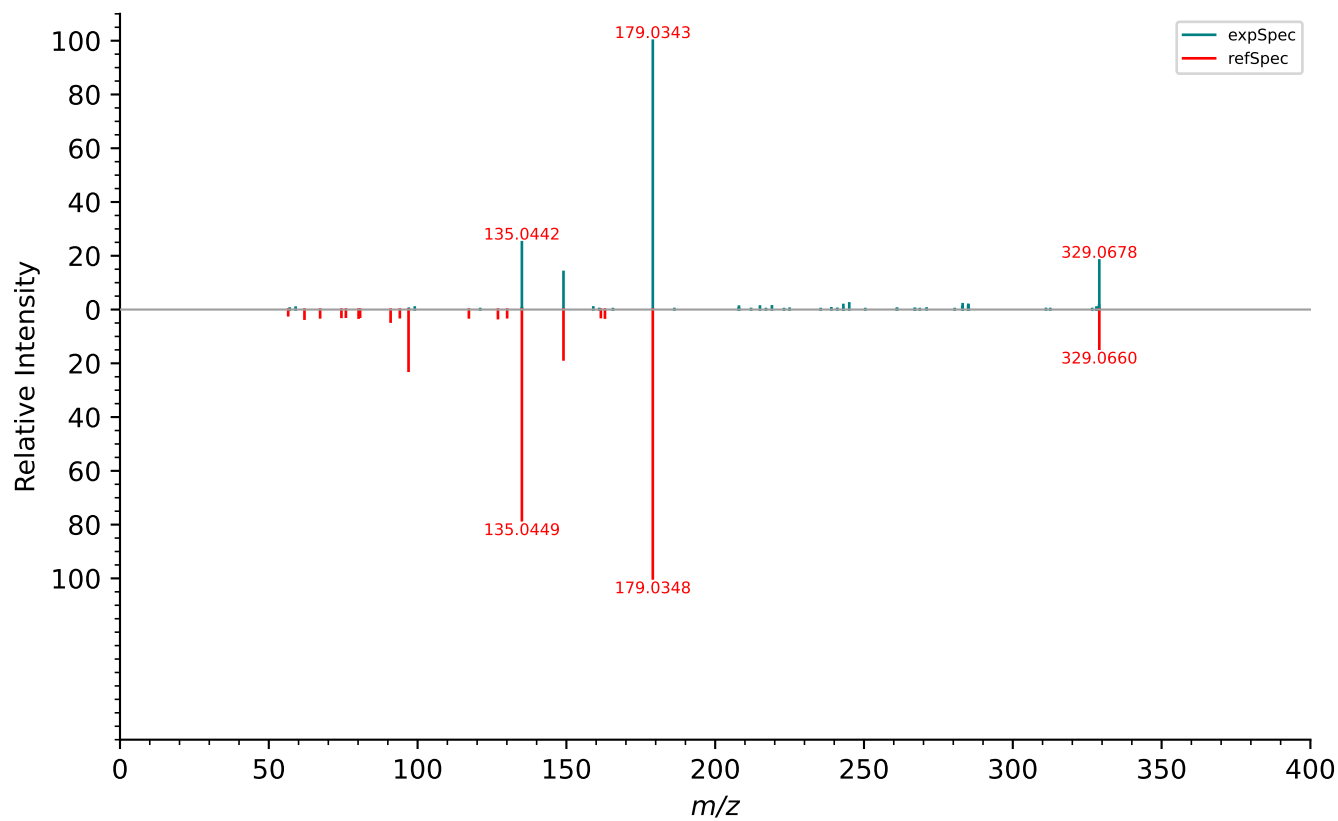

Supplement: identification_of_ingredients.zip [file compound00213.pdf › identification of ingredients/Data analysis/3.mass spectrometry/Original Ingredients/compound00213.pdf]

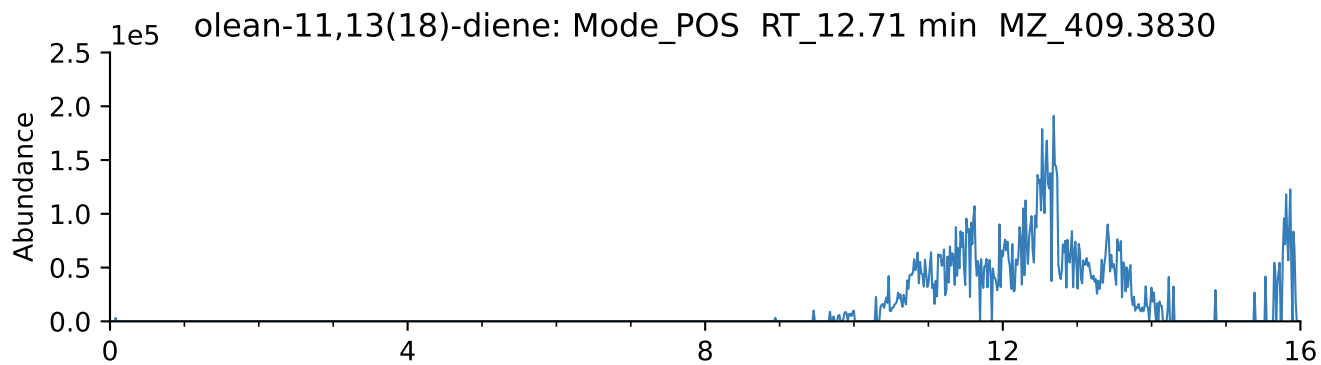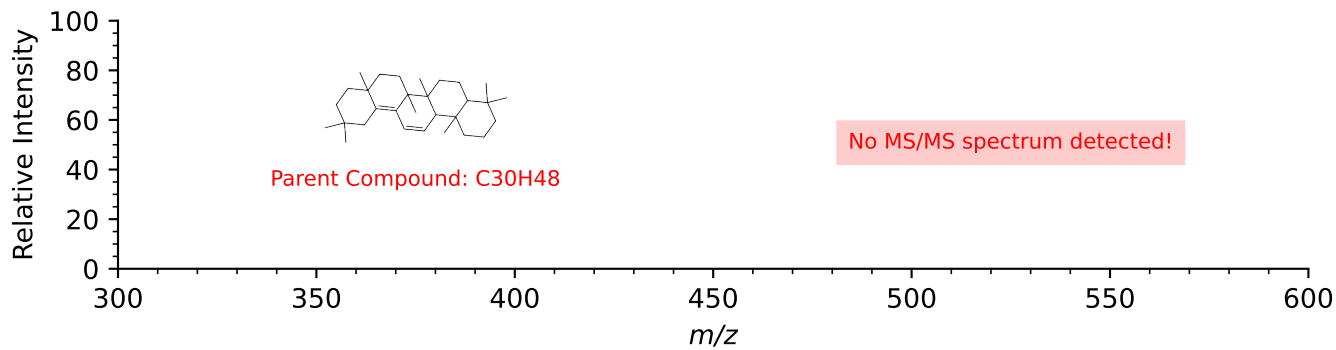

Supplement: identification_of_ingredients.zip [file compound00217.pdf › identification of ingredients/Data analysis/3.mass spectrometry/Original Ingredients/compound00217.pdf]

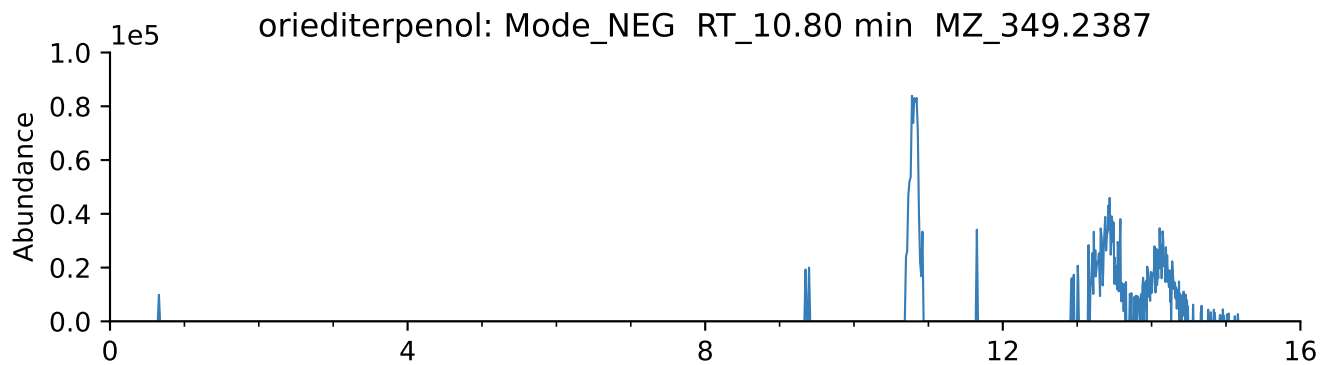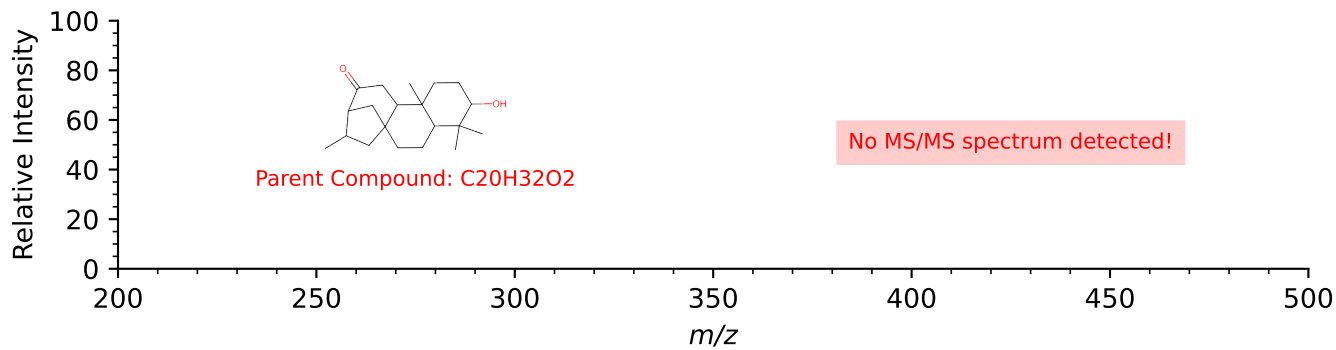

Supplement: identification_of_ingredients.zip [file compound00221.pdf › identification of ingredients/Data analysis/3.mass spectrometry/Original Ingredients/compound00221.pdf]

Orthocumarsaure: Mode\_NEG RT\_4.79 min MZ\_163.0393

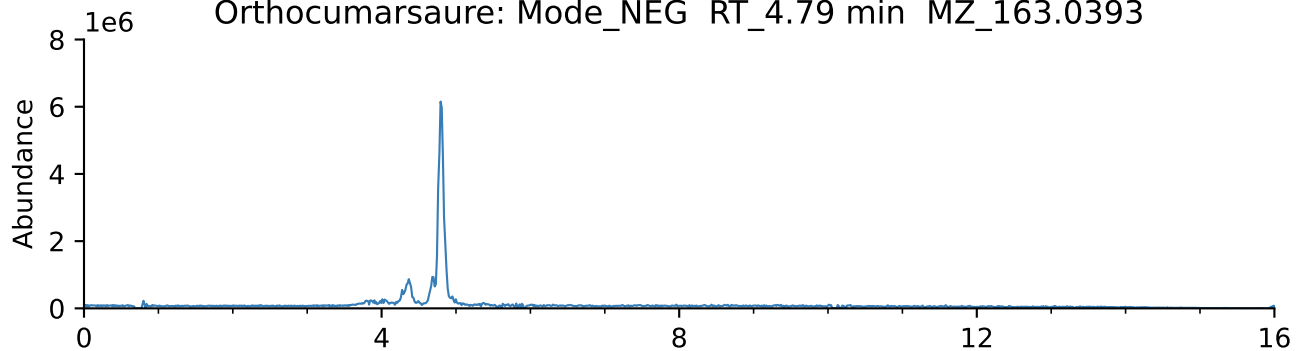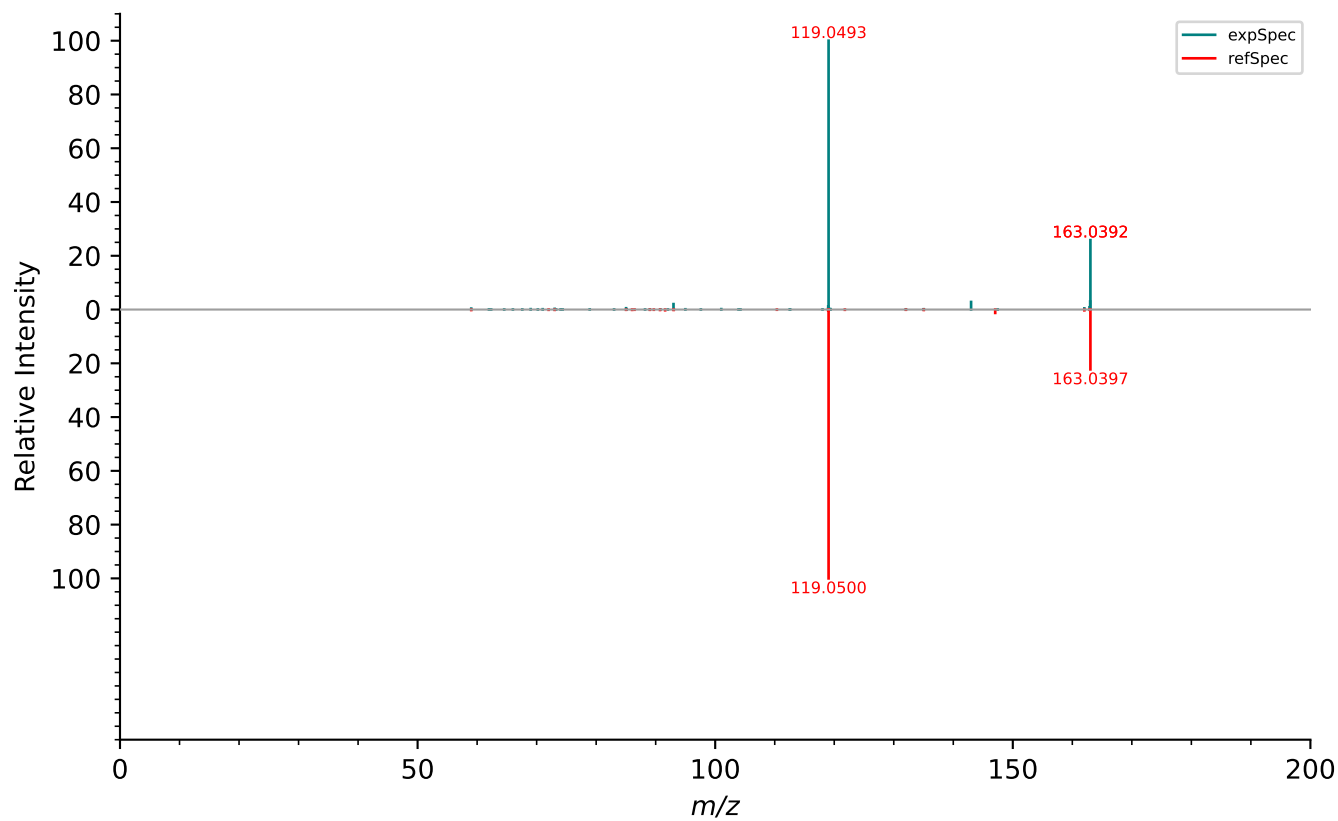

Supplement: identification_of_ingredients.zip [file compound00223.pdf › identification of ingredients/Data analysis/3.mass spectrometry/Original Ingredients/compound00223.pdf]

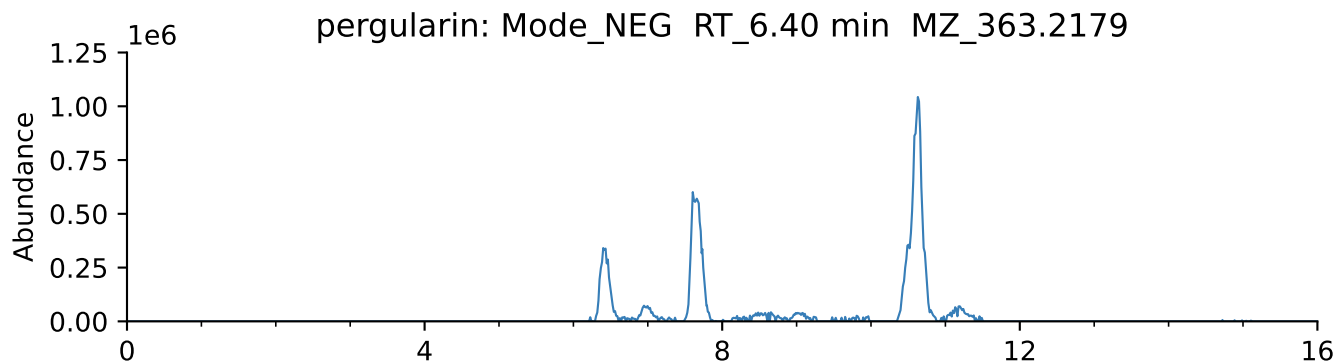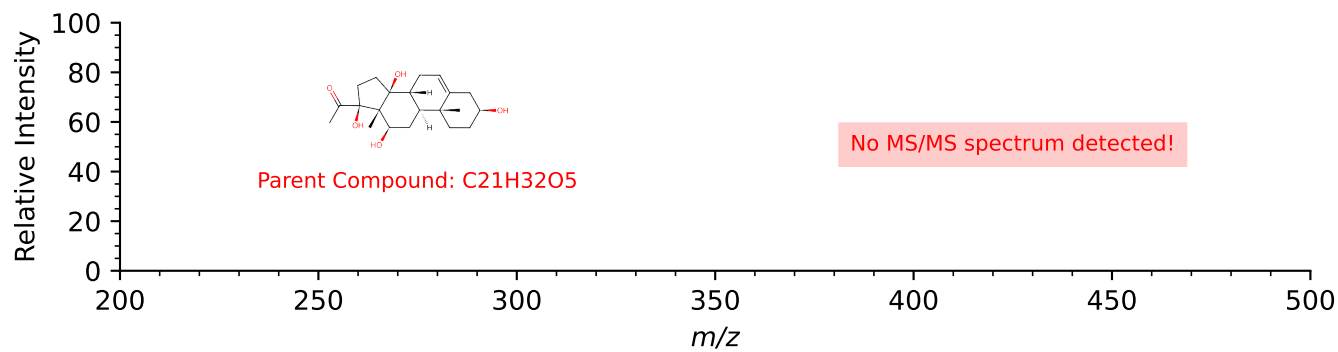

Supplement: identification_of_ingredients.zip [file compound00227.pdf › identification of ingredients/Data analysis/3.mass spectrometry/Original Ingredients/compound00227.pdf]

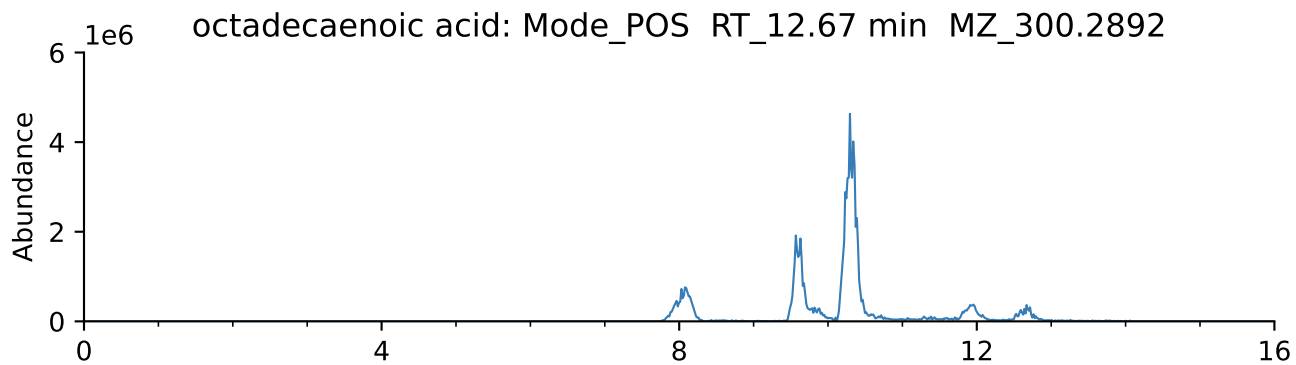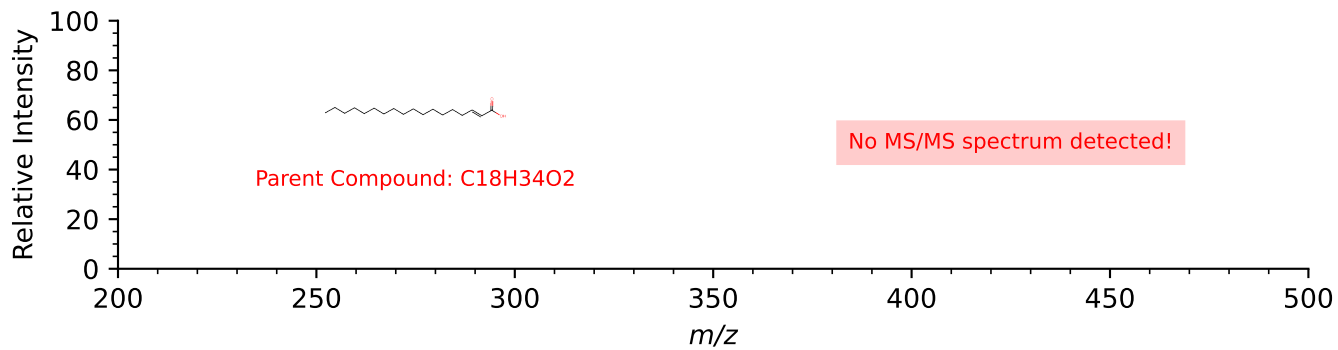

Supplement: identification_of_ingredients.zip [file compound00229.pdf › identification of ingredients/Data analysis/3.mass spectrometry/Original Ingredients/compound00229.pdf]

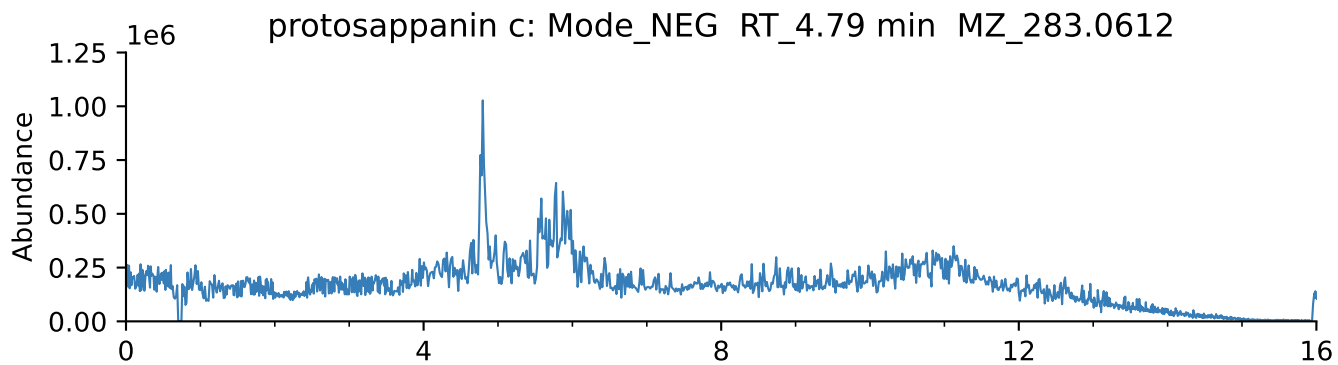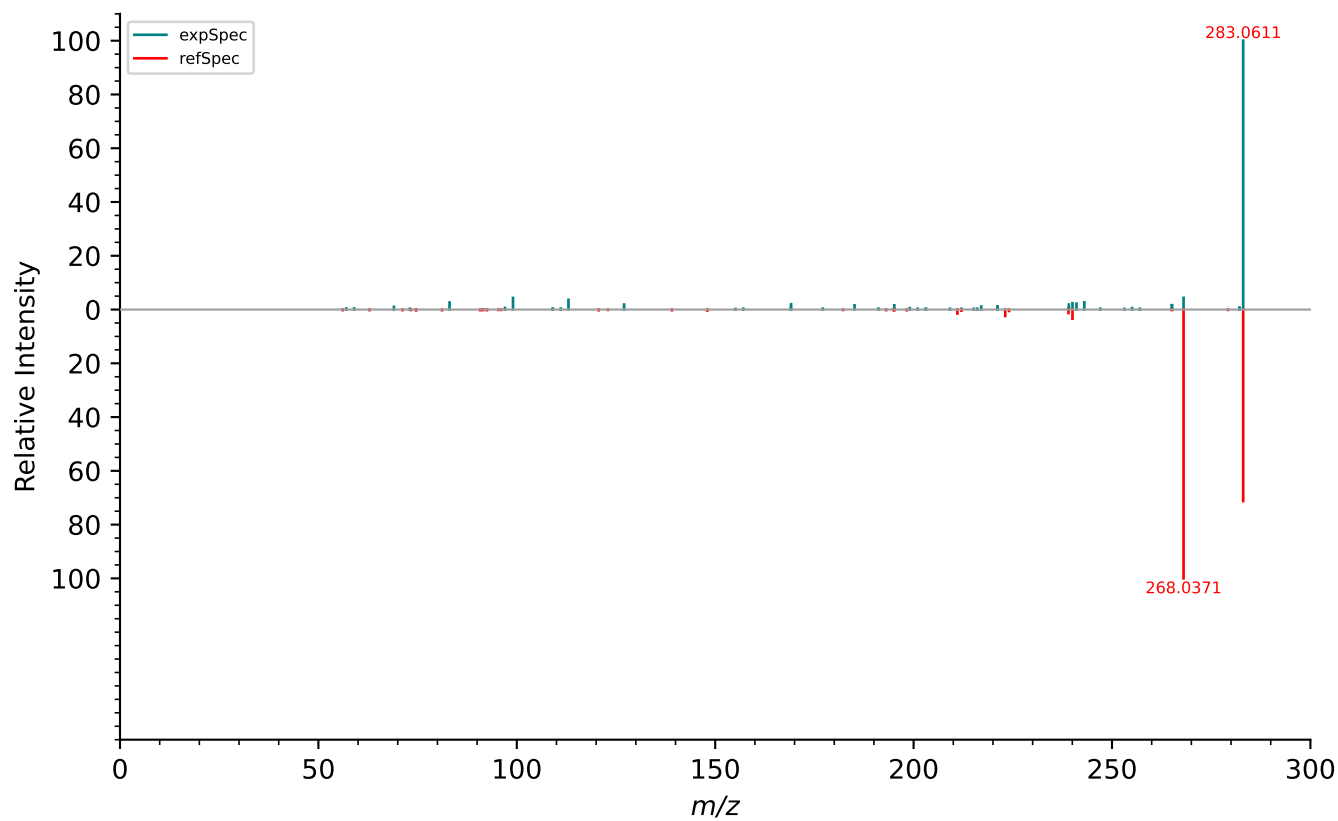

Supplement: identification_of_ingredients.zip [file compound00230.pdf › identification of ingredients/Data analysis/3.mass spectrometry/Original Ingredients/compound00230.pdf]

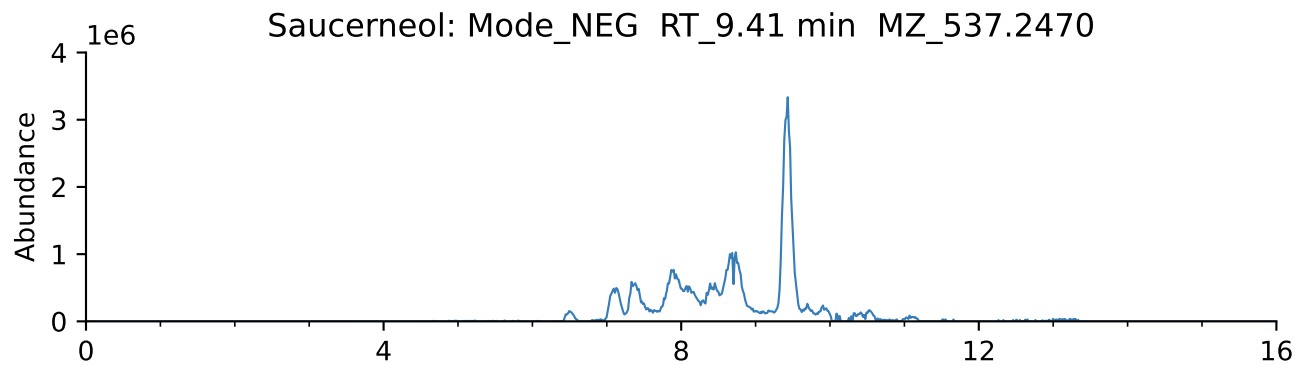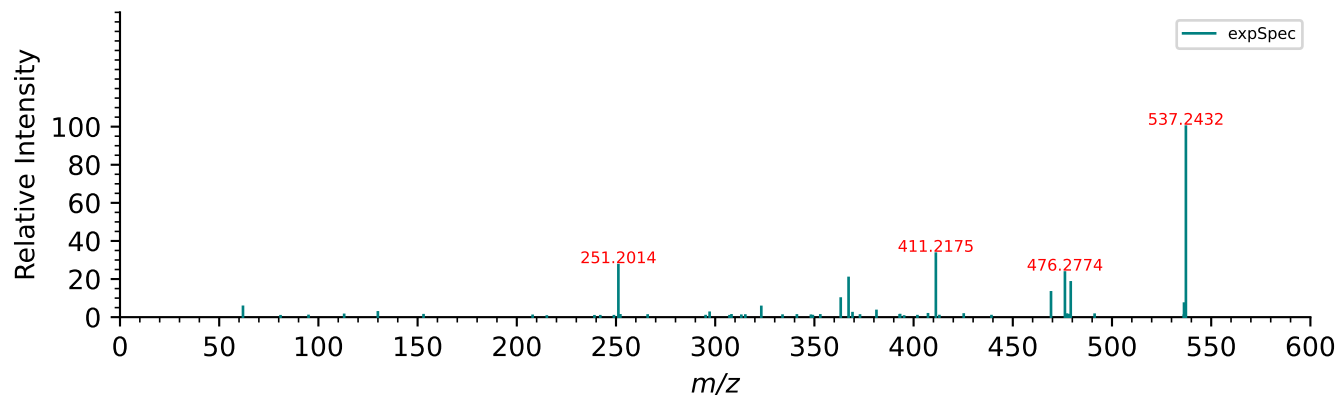

Supplement: identification_of_ingredients.zip [file compound00231.pdf › identification of ingredients/Data analysis/3.mass spectrometry/Original Ingredients/compound00231.pdf]

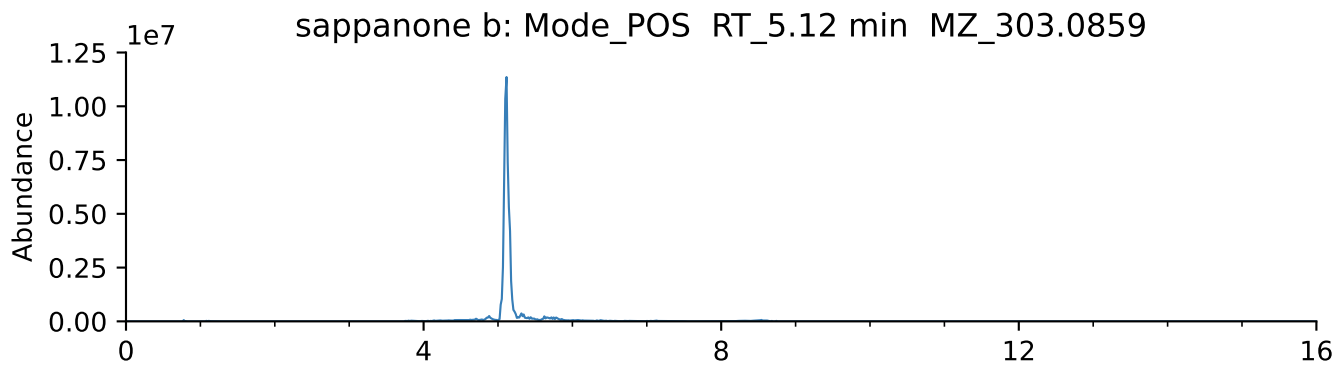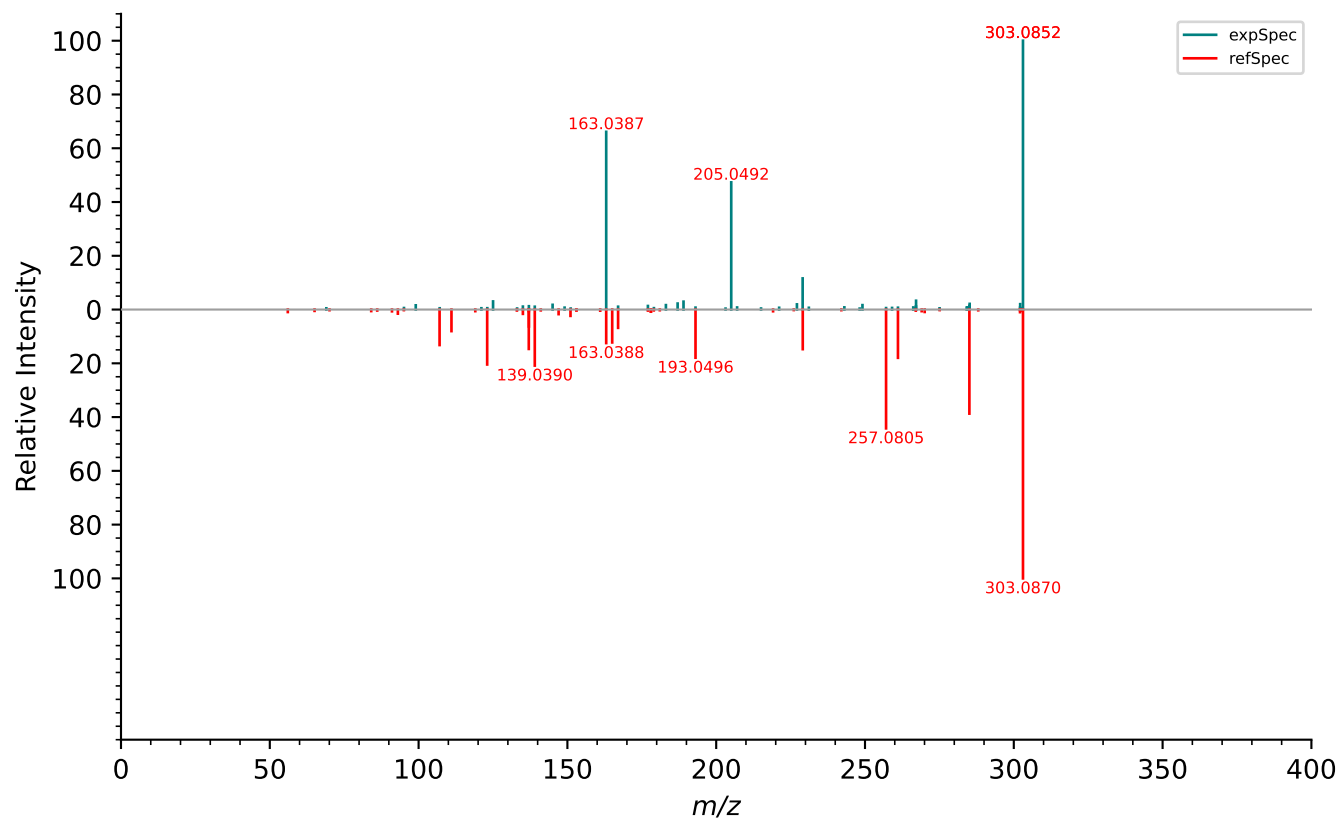

Supplement: identification_of_ingredients.zip [file compound00233.pdf › identification of ingredients/Data analysis/3.mass spectrometry/Original Ingredients/compound00233.pdf]

sanjoinine B: Mode\_NEG RT\_7.99 min MZ\_501.2852

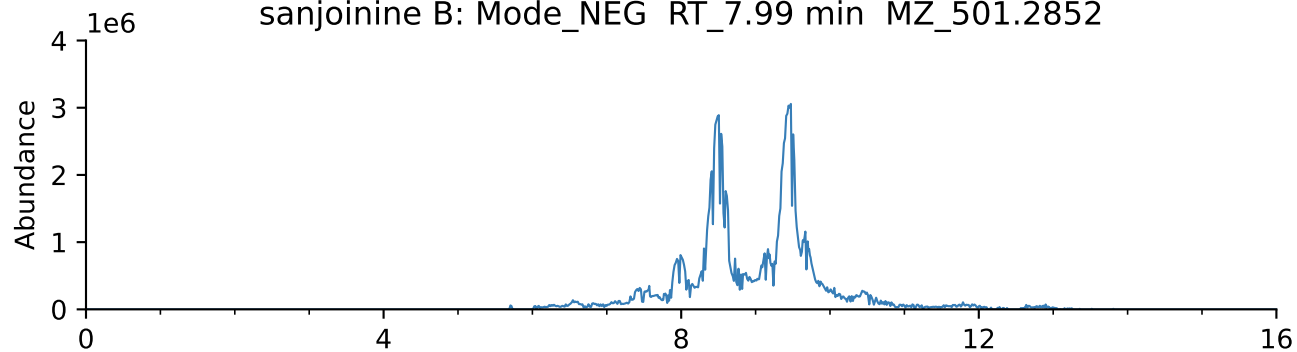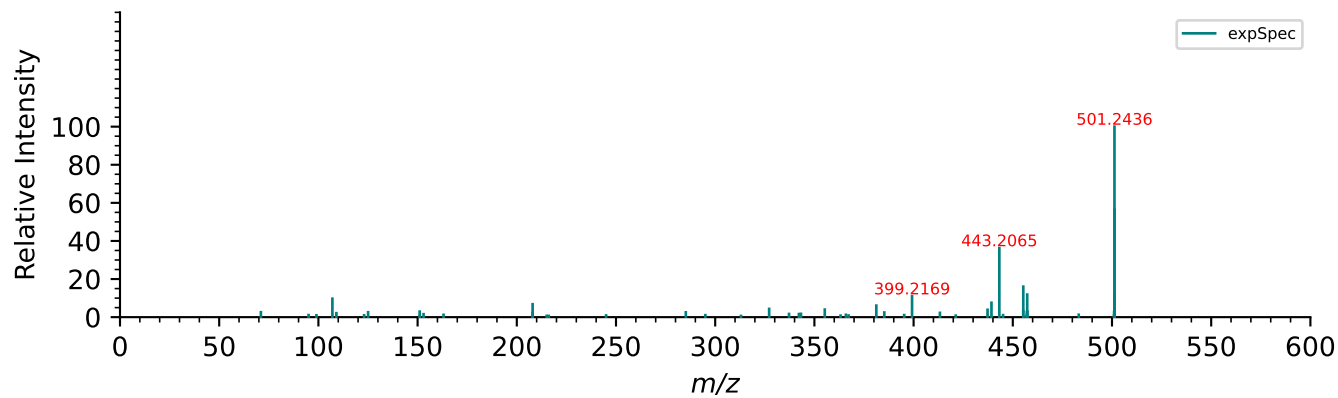

Supplement: identification_of_ingredients.zip [file compound00237.pdf › identification of ingredients/Data analysis/3.mass spectrometry/Original Ingredients/compound00237.pdf]

rugosicacid d: Mode\_NEG RT\_7.07 min MZ\_281.1394

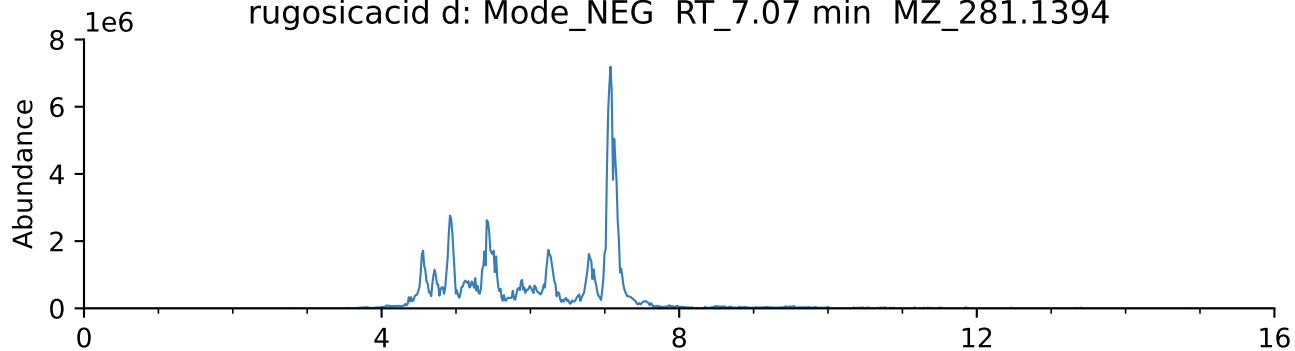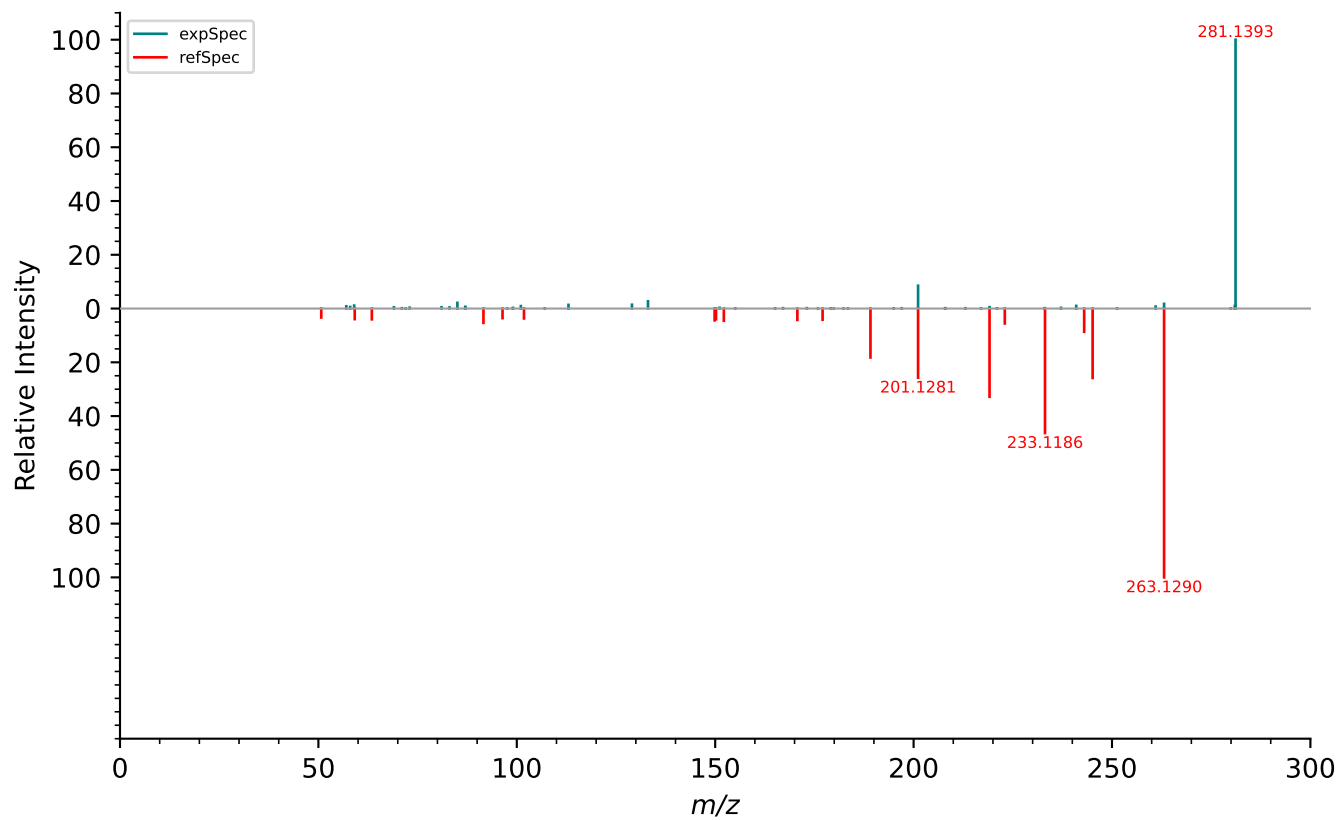

Supplement: identification_of_ingredients.zip [file compound00243.pdf › identification of ingredients/Data analysis/3.mass spectrometry/Original Ingredients/compound00243.pdf]

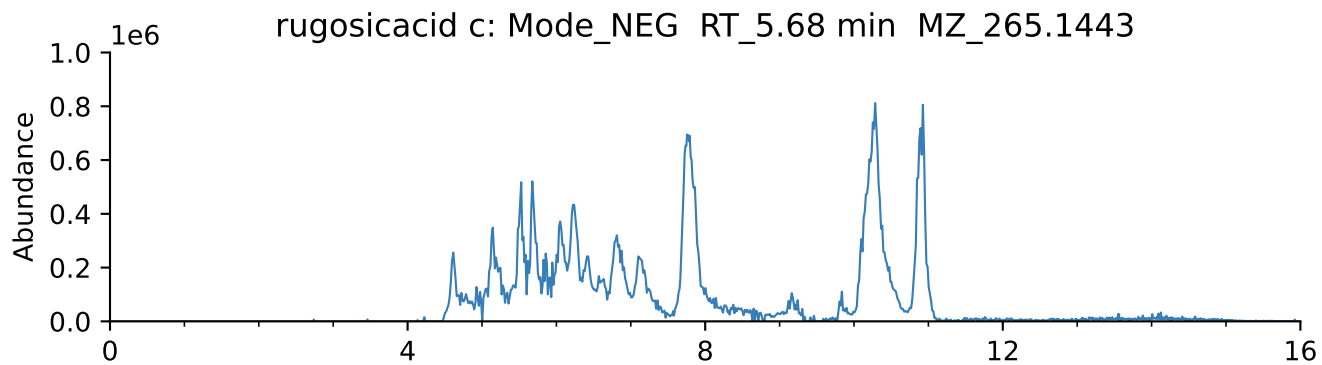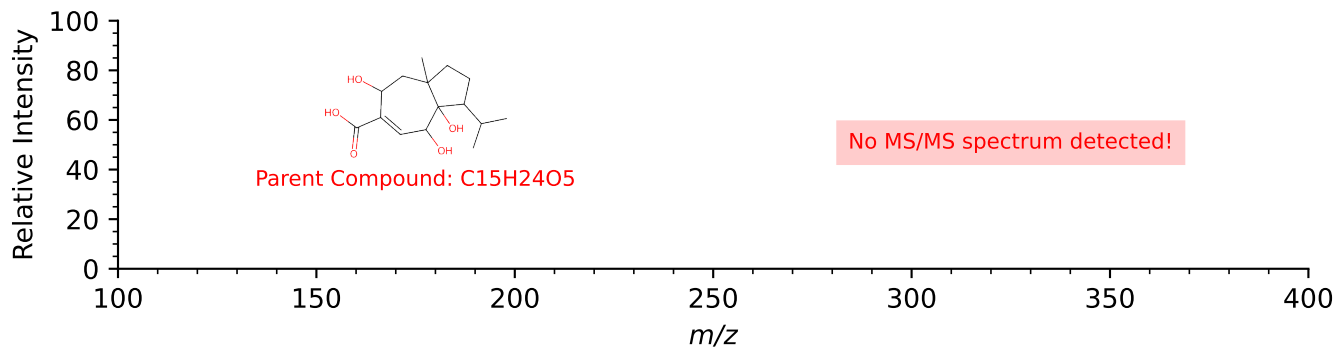

Supplement: identification_of_ingredients.zip [file compound00244.pdf › identification of ingredients/Data analysis/3.mass spectrometry/Original Ingredients/compound00244.pdf]

Quercetagetin 3-methyl ether: Mode\_NEG RT\_5.99 min MZ\_313.0353

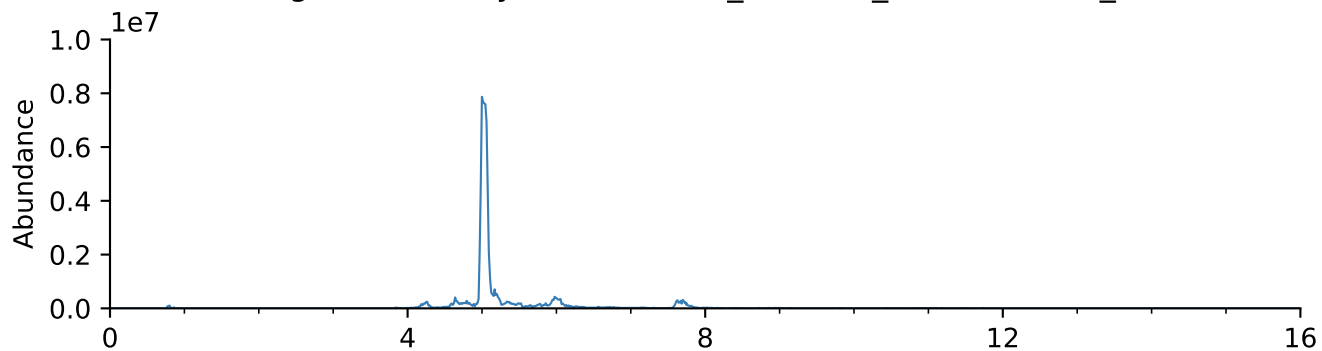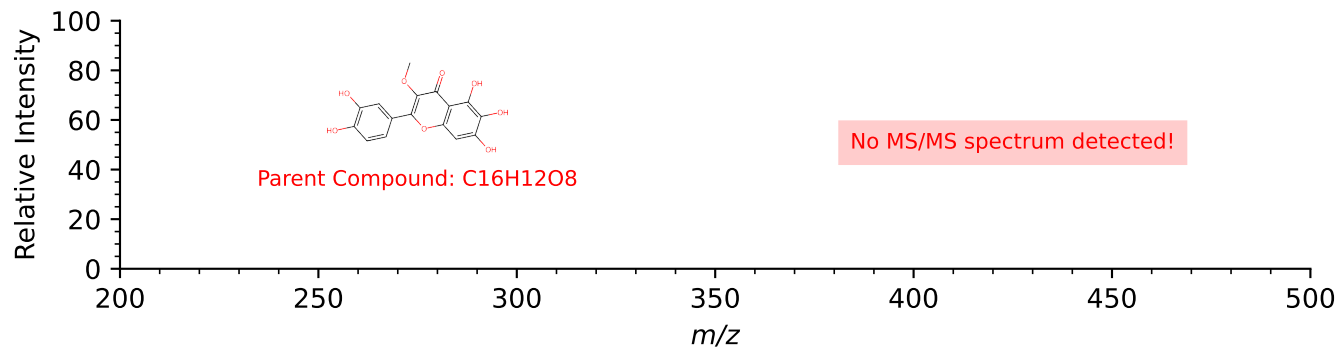

Supplement: identification_of_ingredients.zip [file compound00248.pdf › identification of ingredients/Data analysis/3.mass spectrometry/Original Ingredients/compound00248.pdf]

# RICINELAIDIC ACID FREE ACID: Mode\_NEG RT\_10.96 min MZ\_297.2433

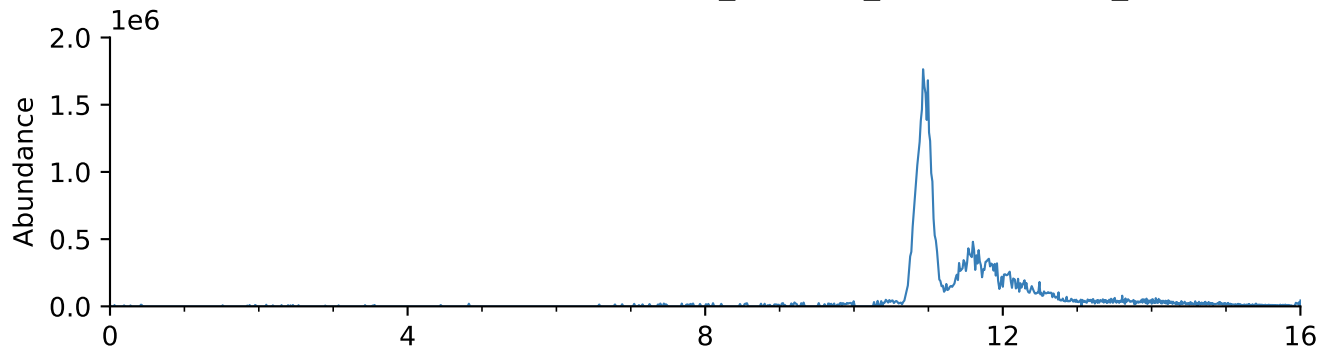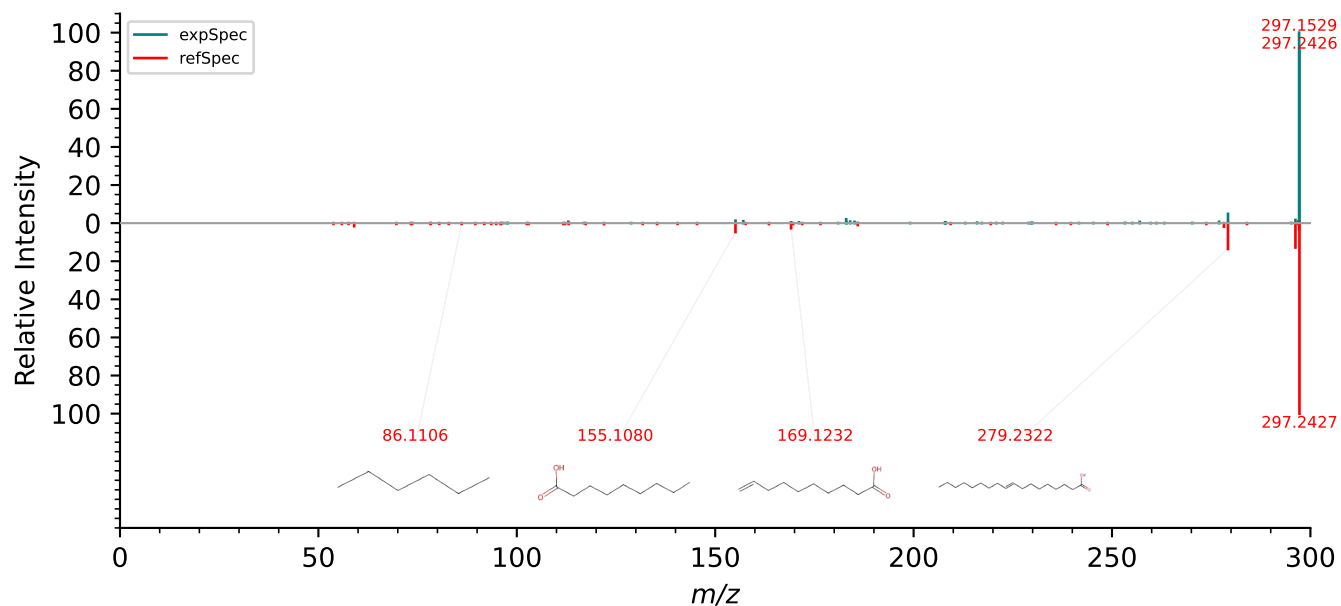

Supplement: identification_of_ingredients.zip [file compound00252.pdf › identification of ingredients/Data analysis/3.mass spectrometry/Original Ingredients/compound00252.pdf]

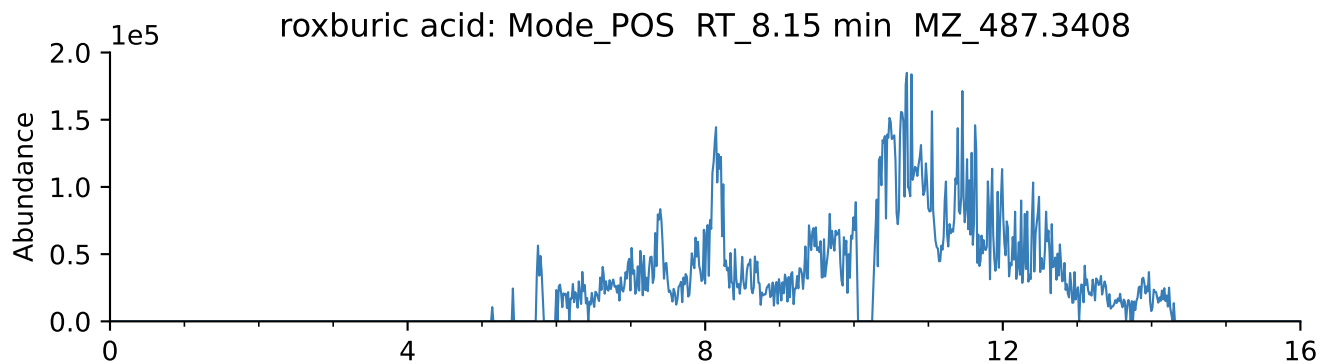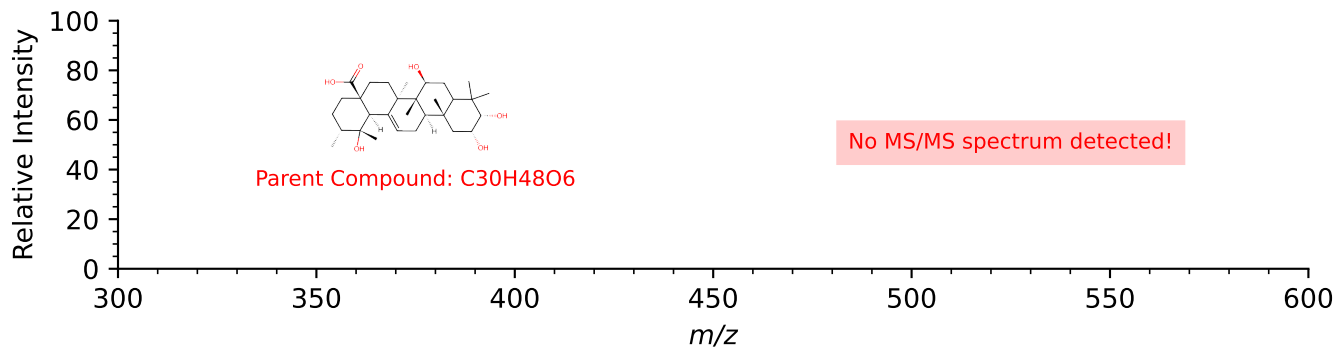

Supplement: identification_of_ingredients.zip [file compound00255.pdf › identification of ingredients/Data analysis/3.mass spectrometry/Original Ingredients/compound00255.pdf]

rugosicacid b: Mode\_NEG RT\_6.25 min MZ\_281.1393

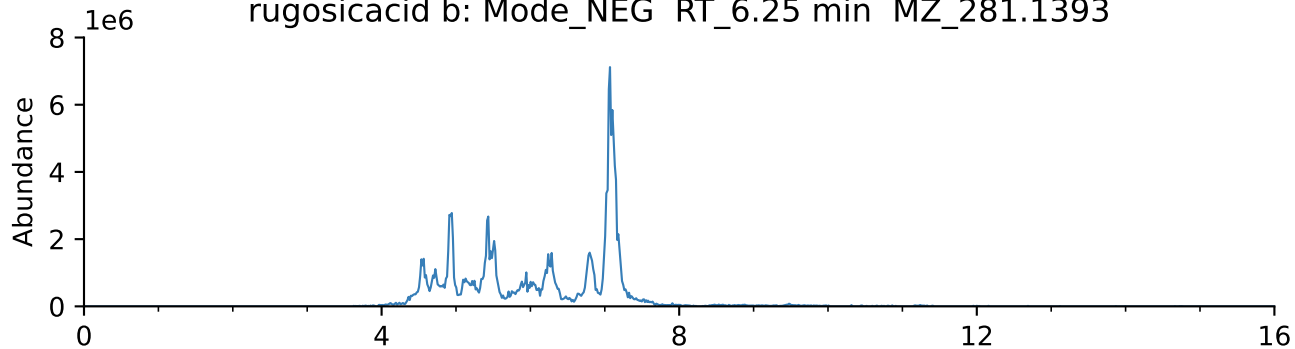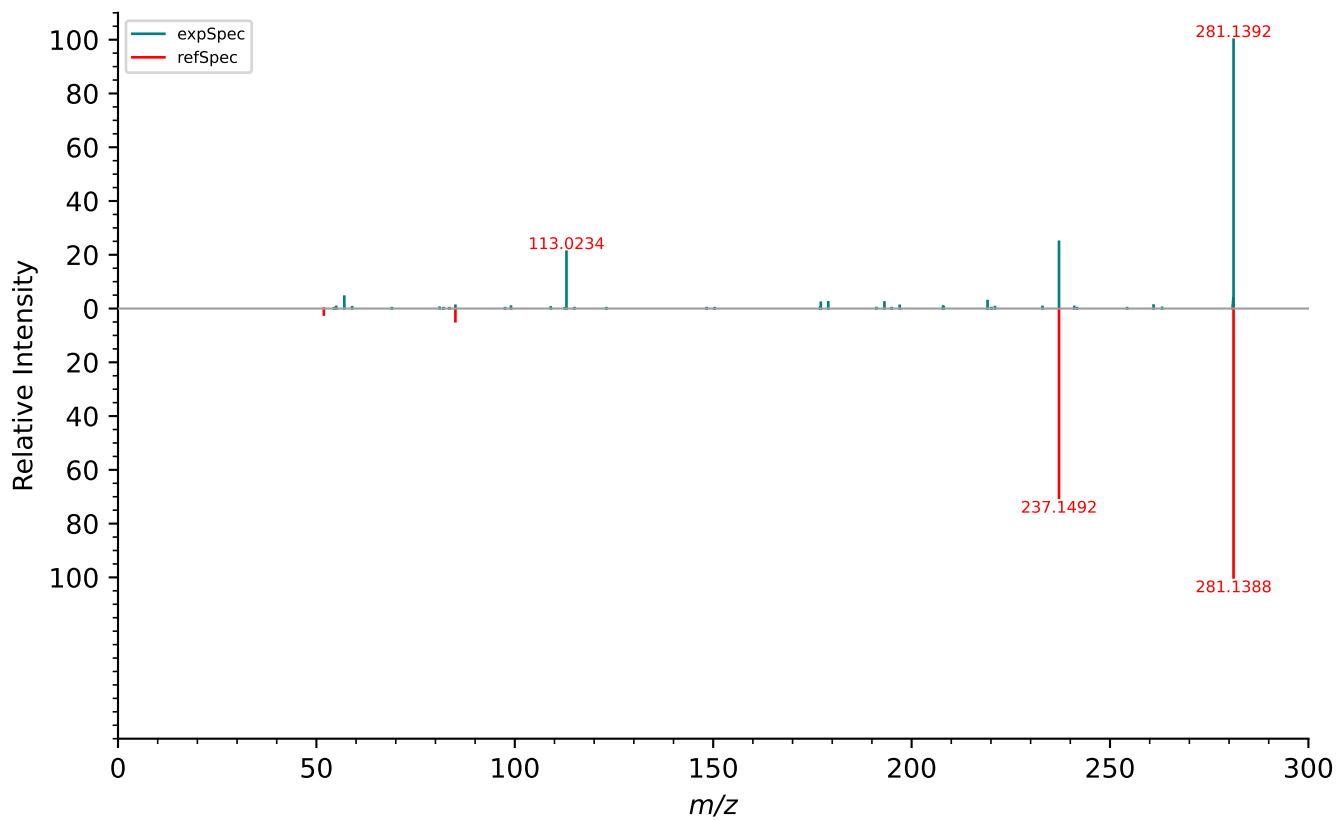

Supplement: identification_of_ingredients.zip [file compound00256.pdf › identification of ingredients/Data analysis/3.mass spectrometry/Original Ingredients/compound00256.pdf]

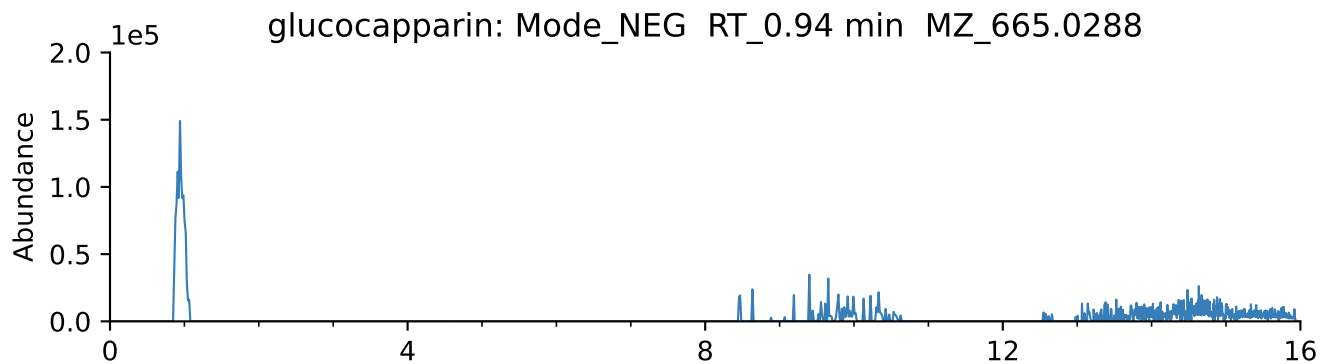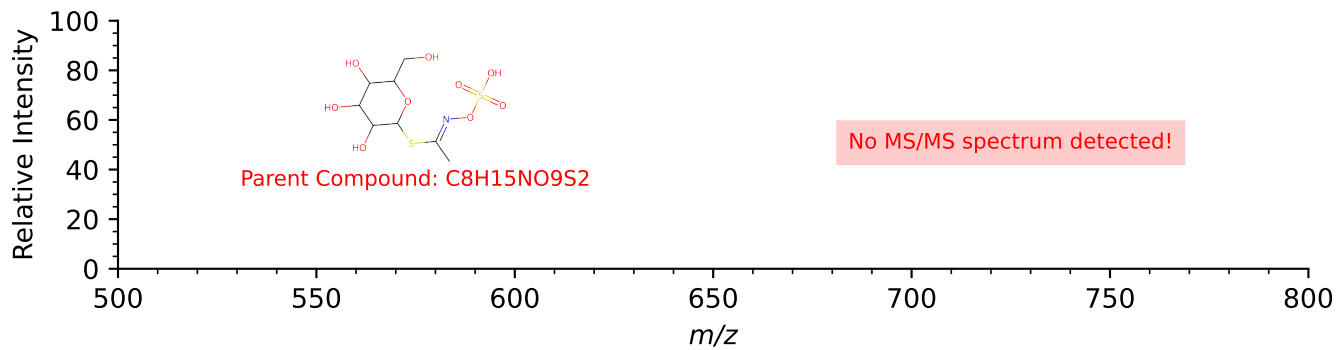

Supplement: identification_of_ingredients.zip [file compound00258.pdf › identification of ingredients/Data analysis/3.mass spectrometry/Original Ingredients/compound00258.pdf]

5-ene-methyl-7,12-didehydroxy-cholate...: Mode\_NEG RT\_9.68 min MZ\_549.3435

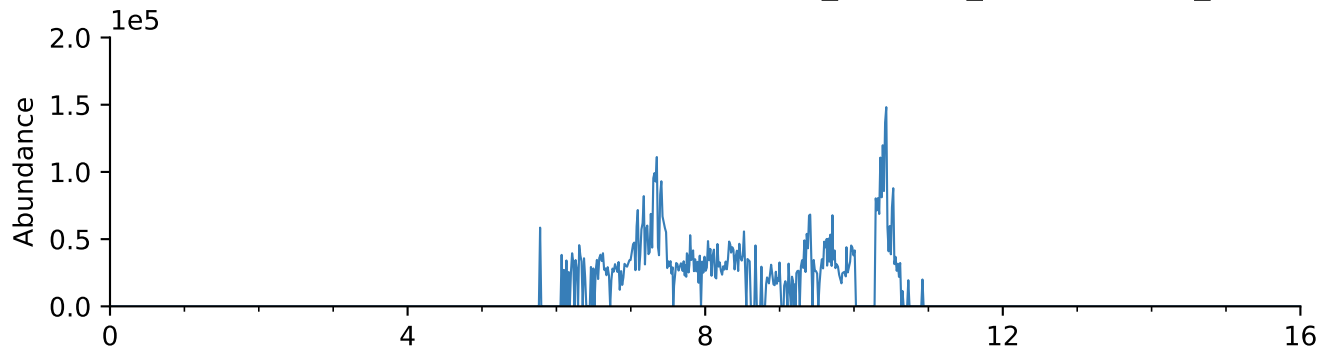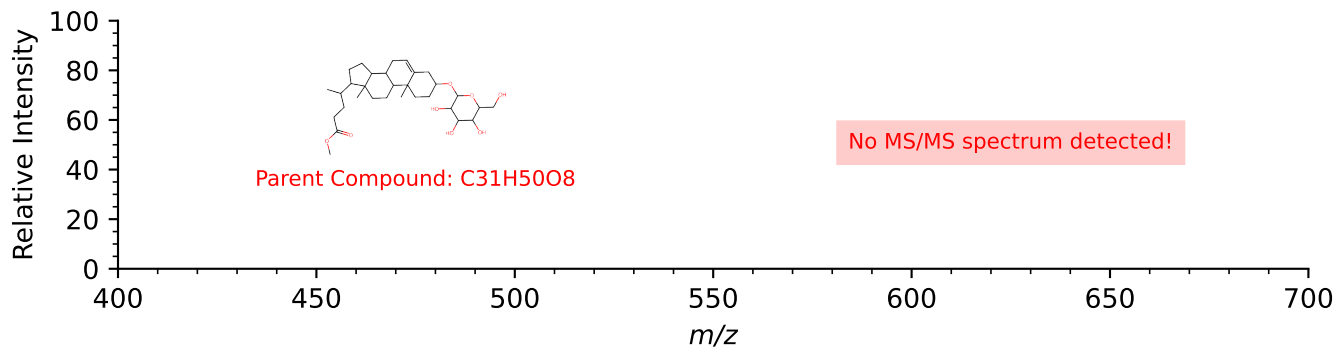

Supplement: identification_of_ingredients.zip [file compound00261.pdf › identification of ingredients/Data analysis/3.mass spectrometry/Original Ingredients/compound00261.pdf]

5-cinnamoyl-9-o-acetylphototaxicin i: Mode\_NEG RT\_8.68 min MZ\_537.2482

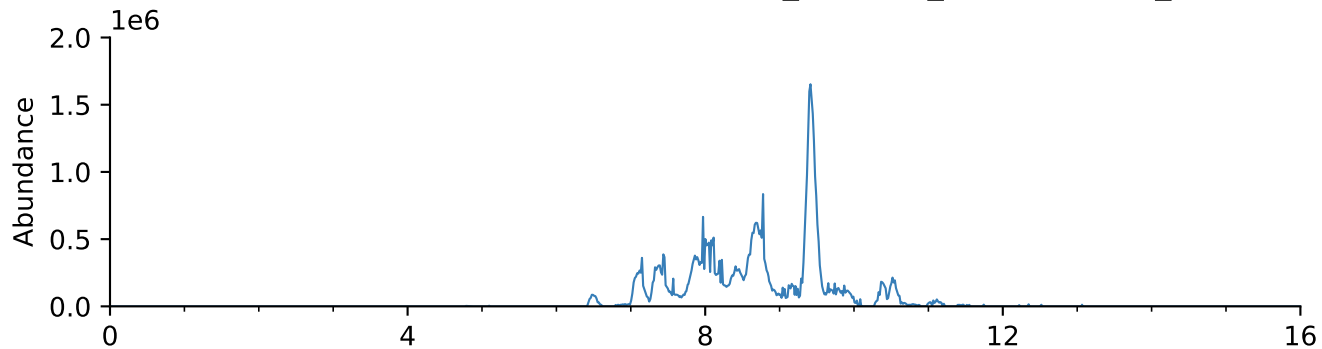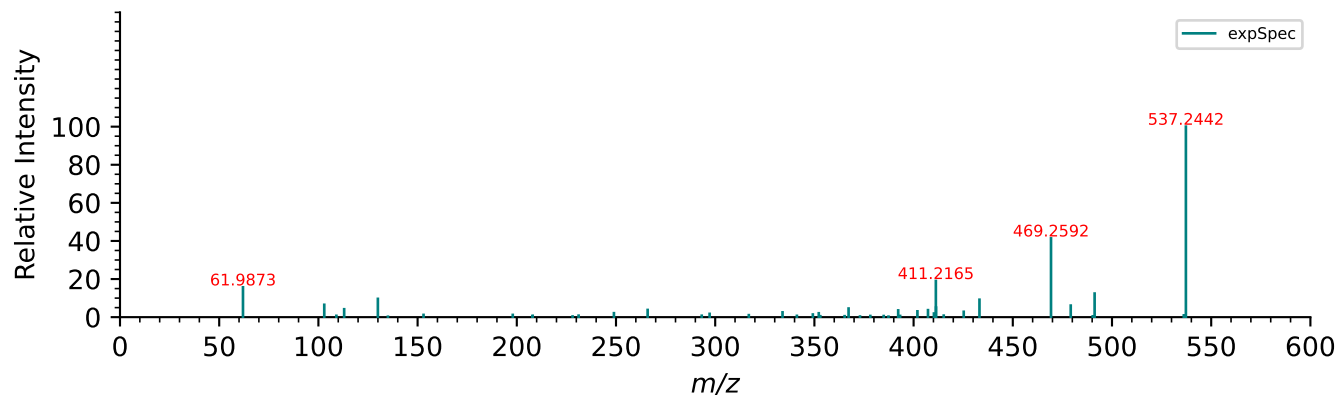

Supplement: identification_of_ingredients.zip [file compound00262.pdf › identification of ingredients/Data analysis/3.mass spectrometry/Original Ingredients/compound00262.pdf]

5-Carboxy-7-hydroxy-2-methyl-benzopyr...: Mode\_NEG RT\_5.74 min MZ\_219.0294

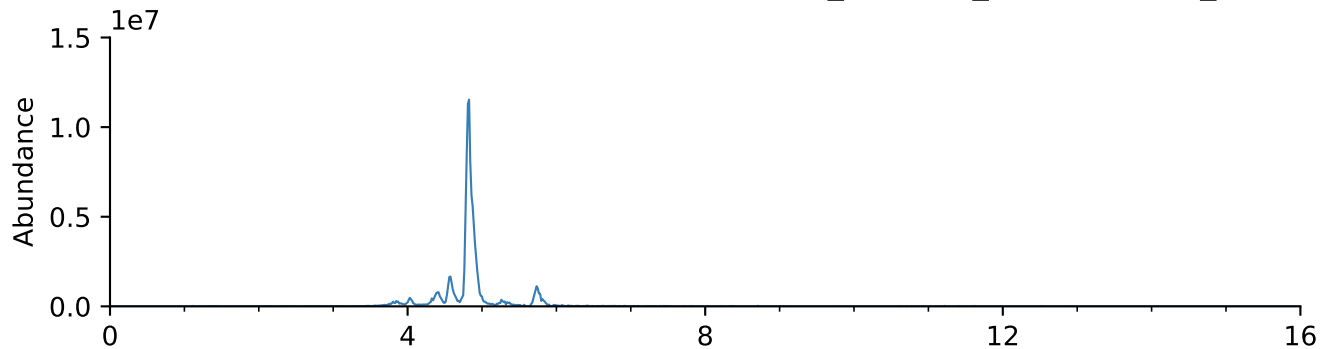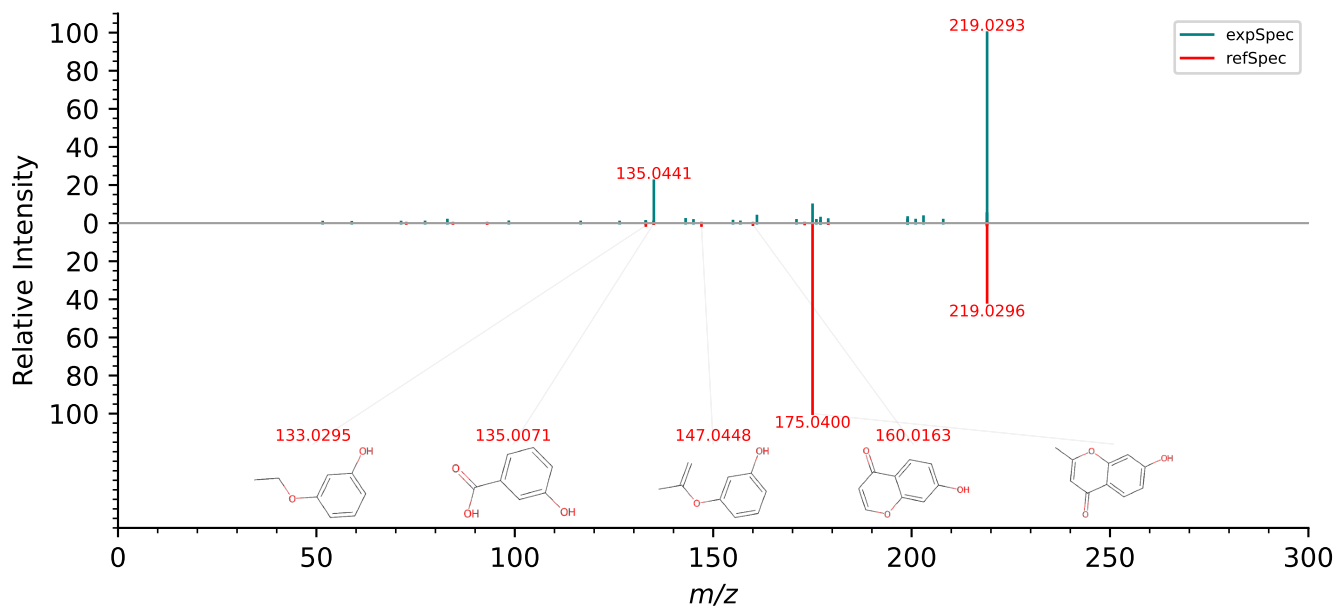

Supplement: identification_of_ingredients.zip [file compound00263.pdf › identification of ingredients/Data analysis/3.mass spectrometry/Original Ingredients/compound00263.pdf]

5-(2-Hydroxyphenoxy)methyl)furfural: Mode\_NEG RT\_6.08 min MZ\_435.1083

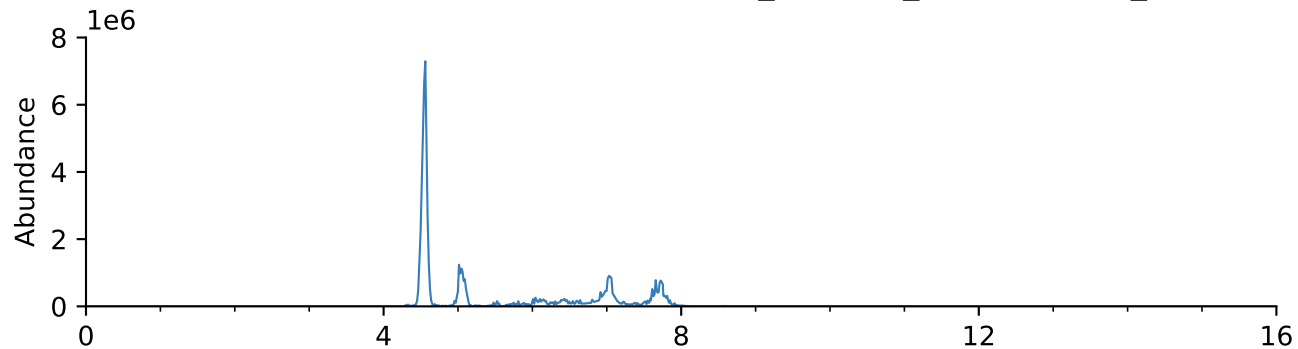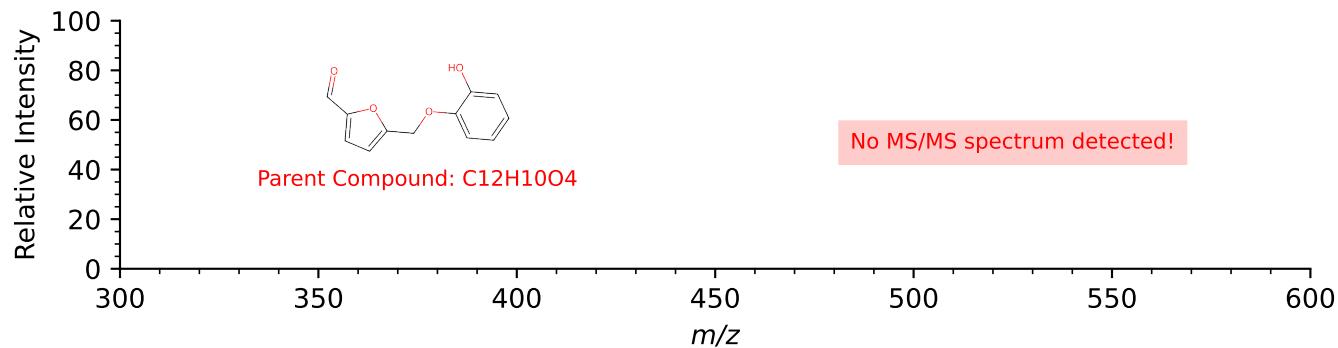

Supplement: identification_of_ingredients.zip [file compound00265.pdf › identification of ingredients/Data analysis/3.mass spectrometry/Original Ingredients/compound00265.pdf]

5,7-Dihydroxy-4-oxo-4H-chromene-2-car...: Mode\_NEG RT\_4.44 min MZ\_221.0089

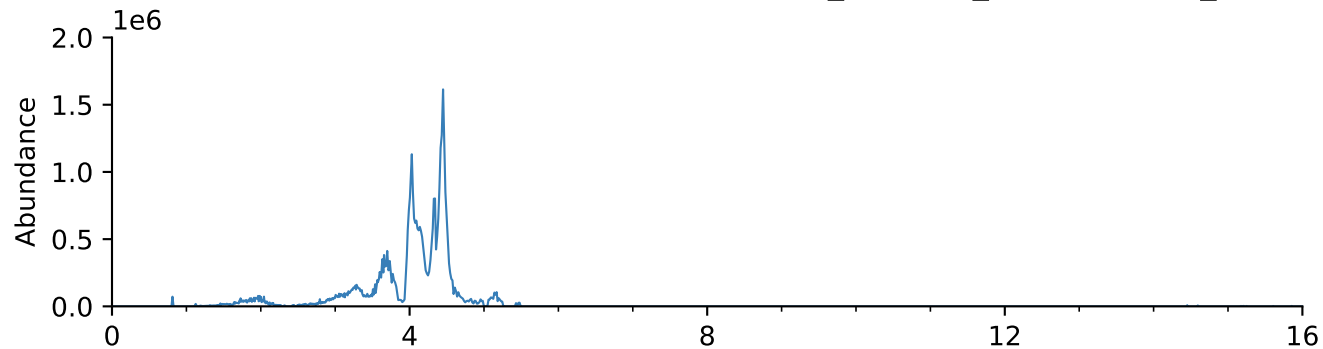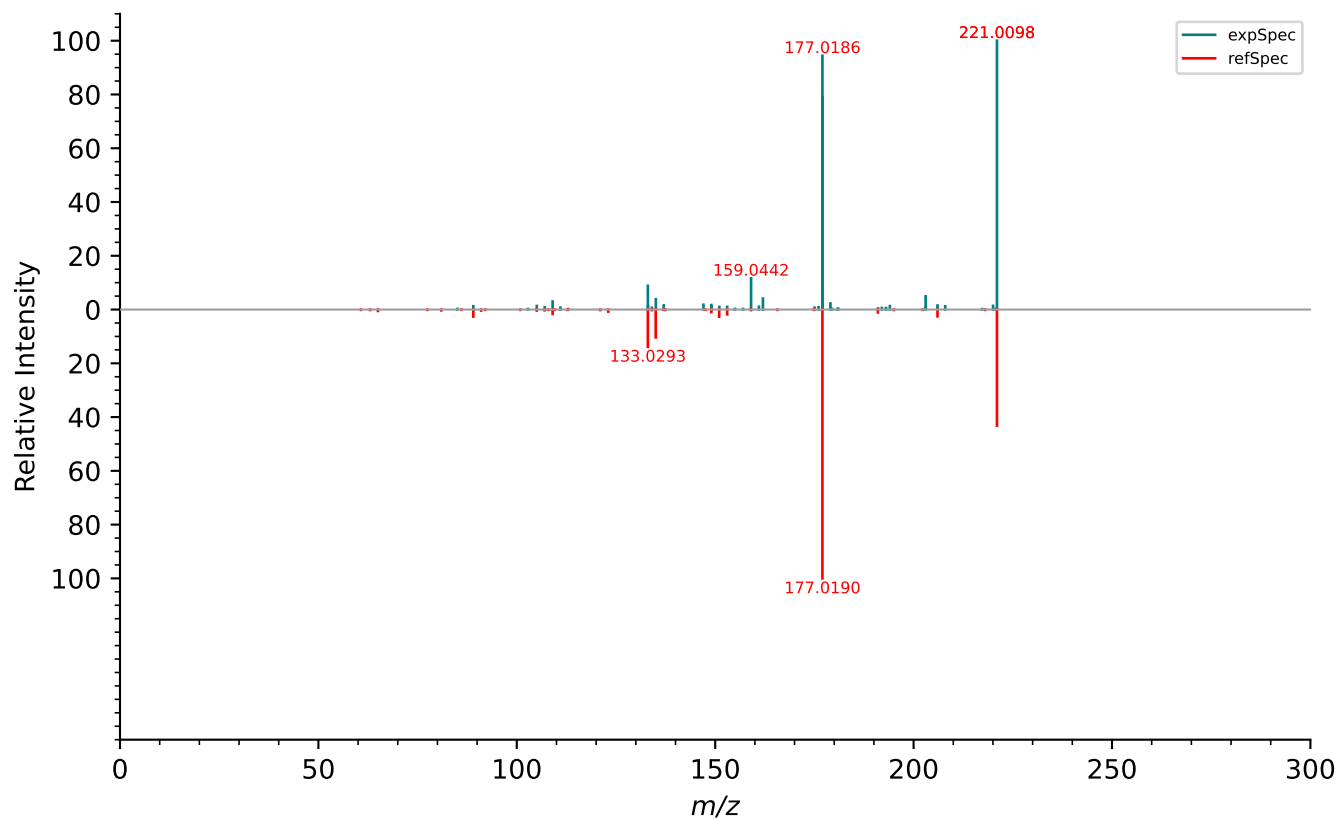

Supplement: identification_of_ingredients.zip [file compound00269.pdf › identification of ingredients/Data analysis/3.mass spectrometry/Original Ingredients/compound00269.pdf]

5,7,8-Trihydroxy-2-methyl-4H-1-benzop...: Mode\_NEG RT\_4.80 min MZ\_207.0294

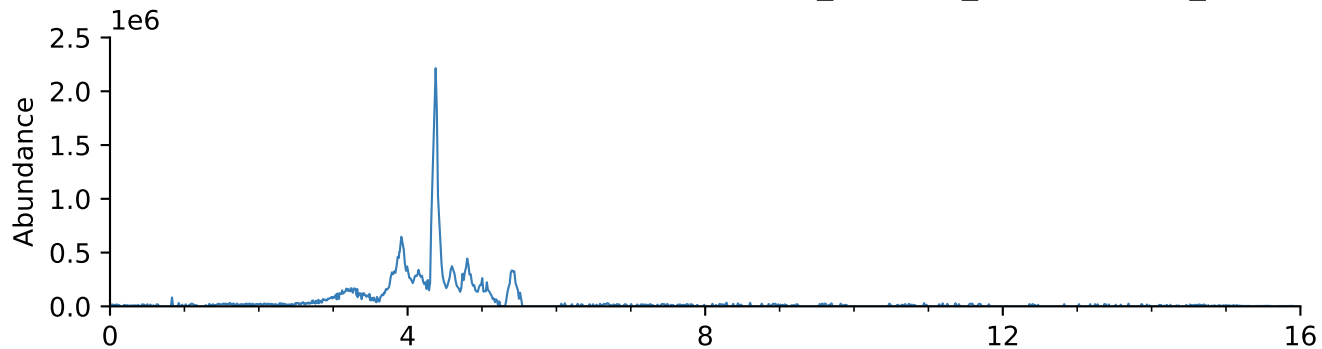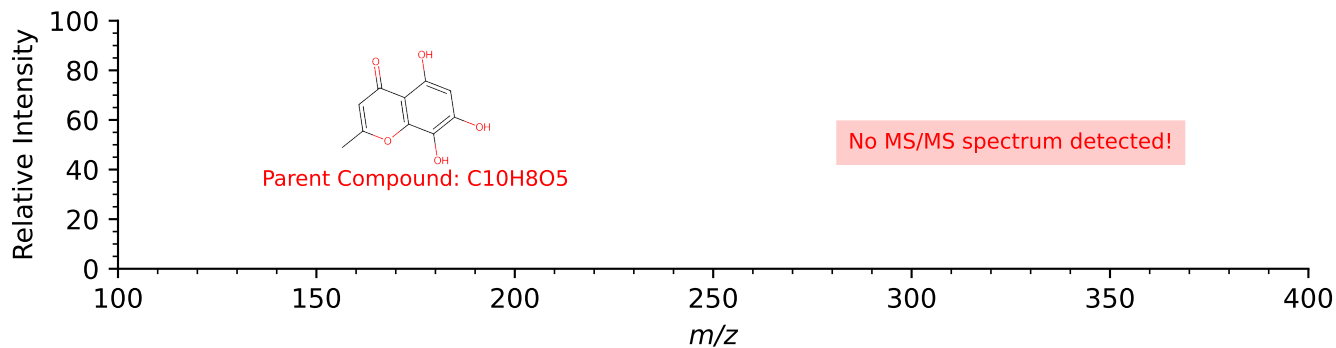

Supplement: identification_of_ingredients.zip [file compound00270.pdf › identification of ingredients/Data analysis/3.mass spectrometry/Original Ingredients/compound00270.pdf]

4-hydroxymethyl-2,6-dimethoxyphenyl- $\beta$ ...: Mode\_NEG RT\_3.77 min MZ\_345.1193

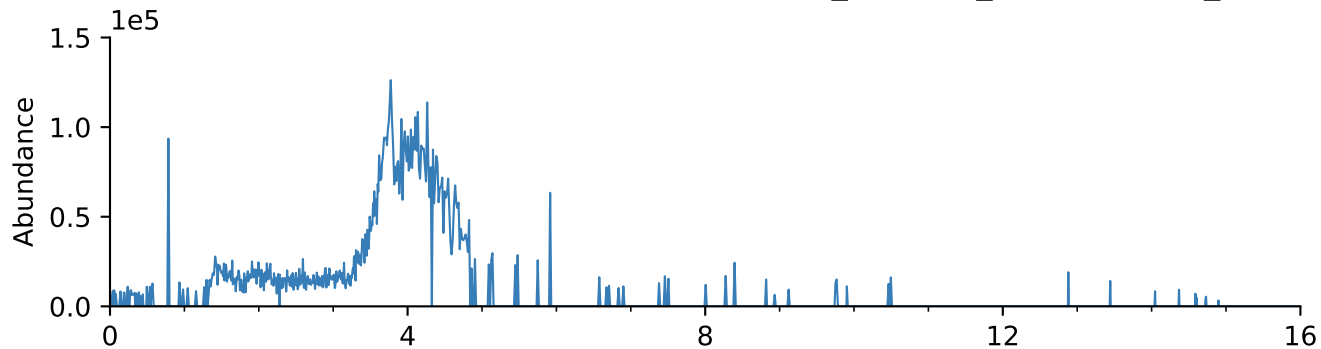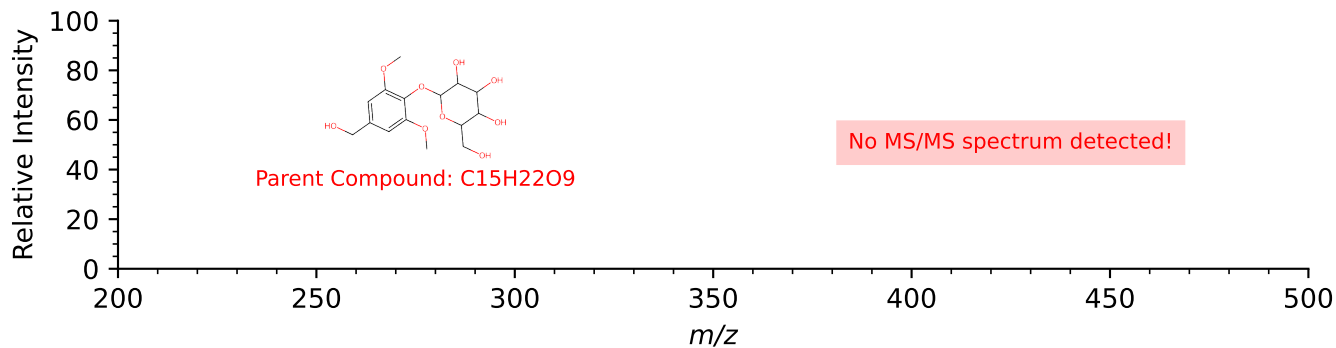

Supplement: identification_of_ingredients.zip [file compound00273.pdf › identification of ingredients/Data analysis/3.mass spectrometry/Original Ingredients/compound00273.pdf]

3a,4-Dihydro-2-benzofuran-1,3-dione: Mode\_NEG RT\_4.83 min MZ\_299.0562

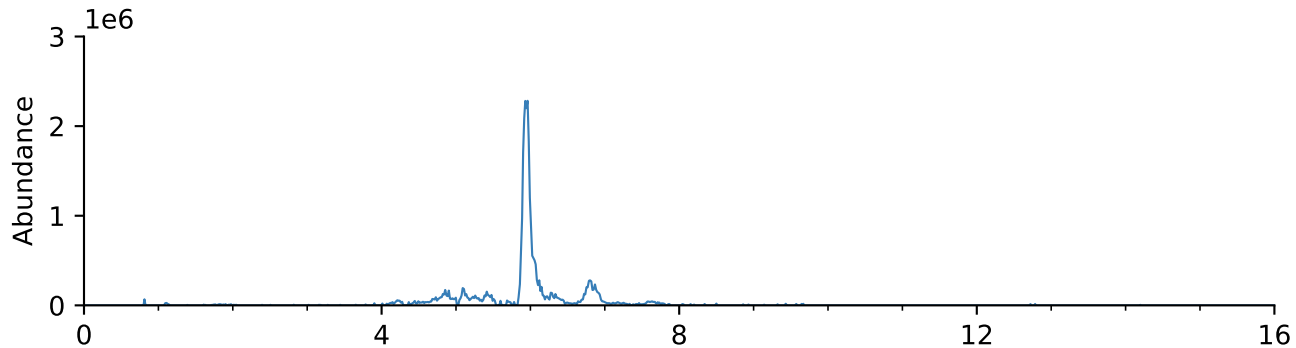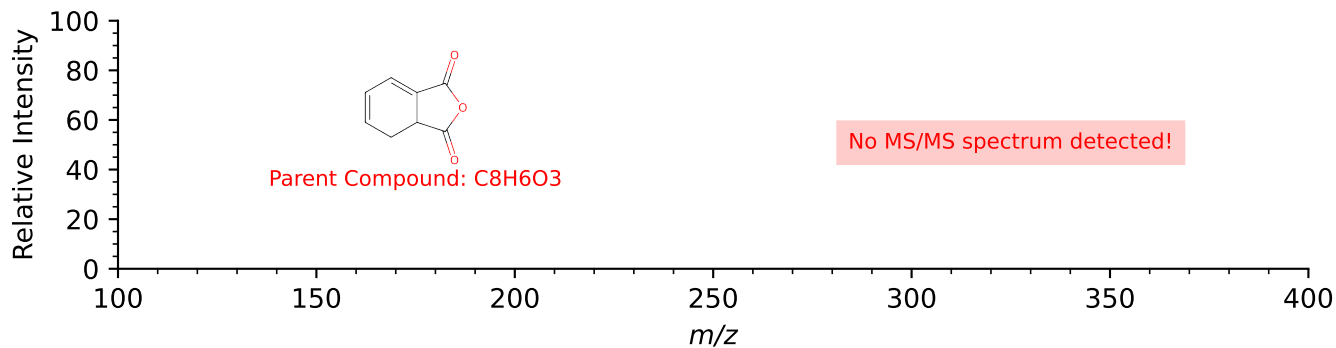

Supplement: identification_of_ingredients.zip [file compound00277.pdf › identification of ingredients/Data analysis/3.mass spectrometry/Original Ingredients/compound00277.pdf]

3 $\alpha$ ,24-dihydroxyolean-12-en-28-oicacid: Mode\_NEG RT\_10.83 min MZ\_471.3482

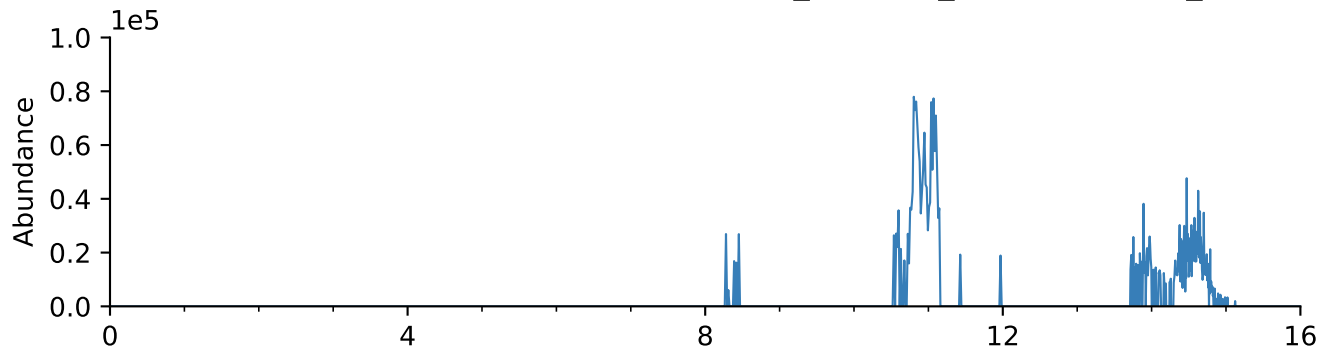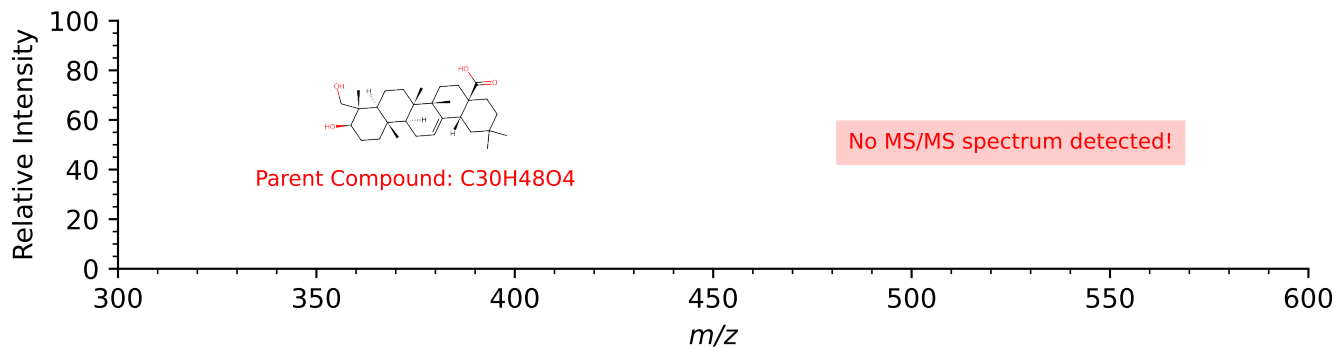

Supplement: identification_of_ingredients.zip [file compound00278.pdf › identification of ingredients/Data analysis/3.mass spectrometry/Original Ingredients/compound00278.pdf]

3 $\beta$ ,23-dihydroxy-oleana-11,13(18)-dien...: Mode\_NEG RT\_10.88 min MZ\_469.3323

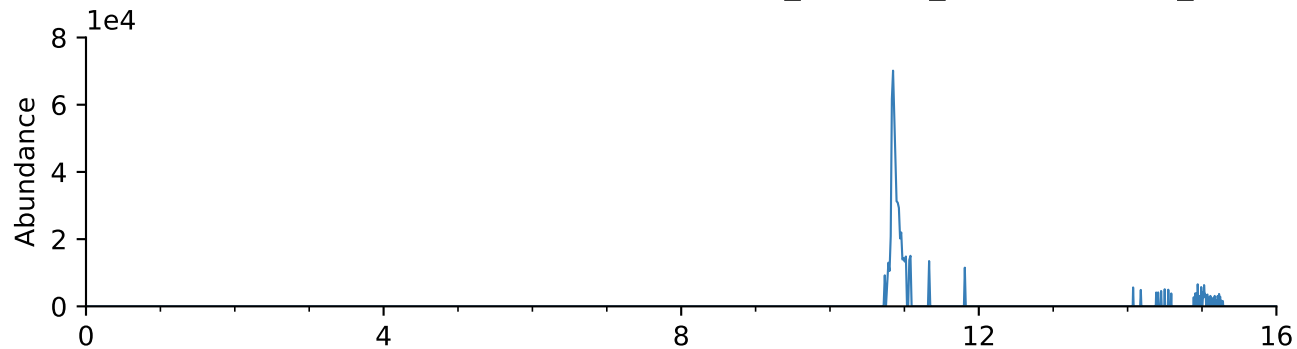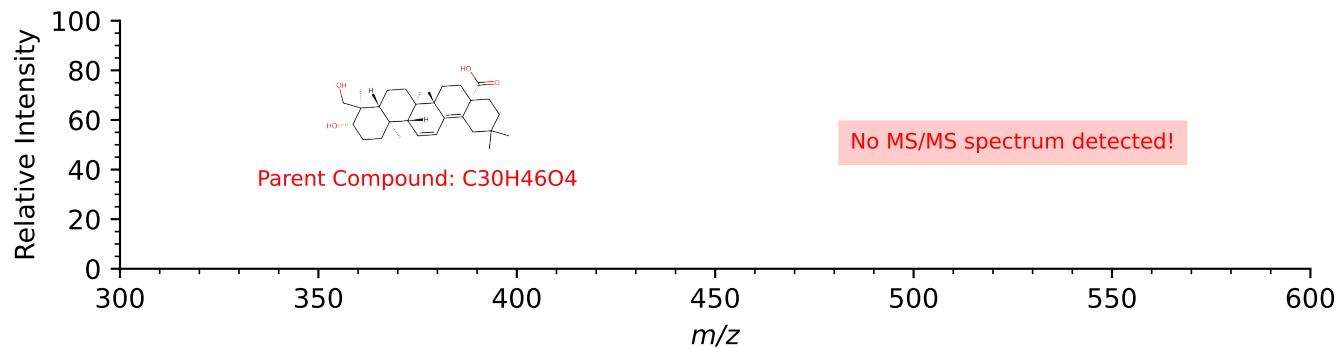

Supplement: identification_of_ingredients.zip [file compound00279.pdf › identification of ingredients/Data analysis/3.mass spectrometry/Original Ingredients/compound00279.pdf]

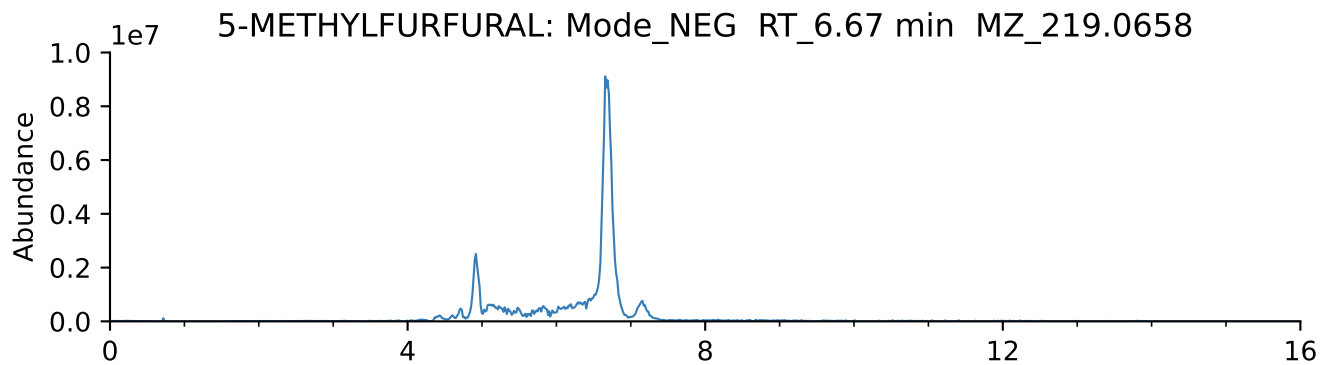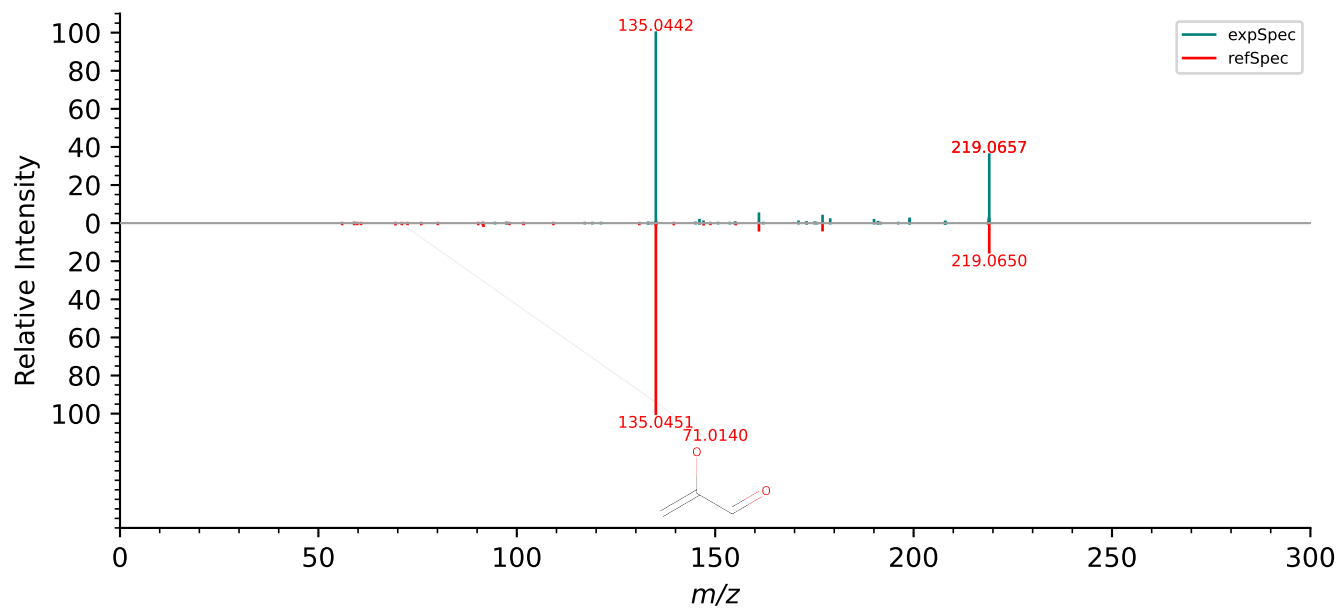

Supplement: identification_of_ingredients.zip [file compound00280.pdf › identification of ingredients/Data analysis/3.mass spectrometry/Original Ingredients/compound00280.pdf]
