# Supplementary figures and images for: UPLC-MS metabolite profiling and antioxidant activity of Sanghuangporus sanghuang extract (part 2 of 2)
Source: PeerJ journal article supplement (doi:10.7717/peerj.18758), 2025-01-22

4,5-dihydroxy-3-oxocyclohexene-1-carb...: Mode\_NEG RT\_1.10 min MZ\_217.0350

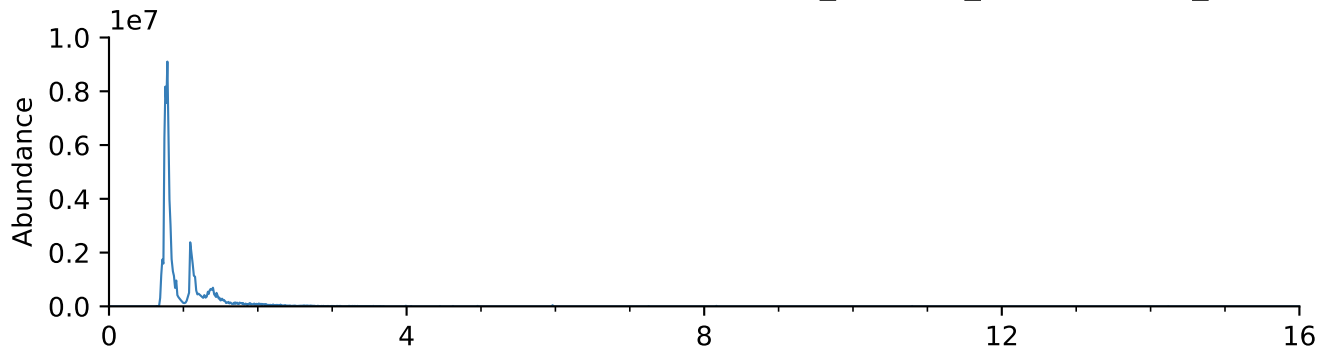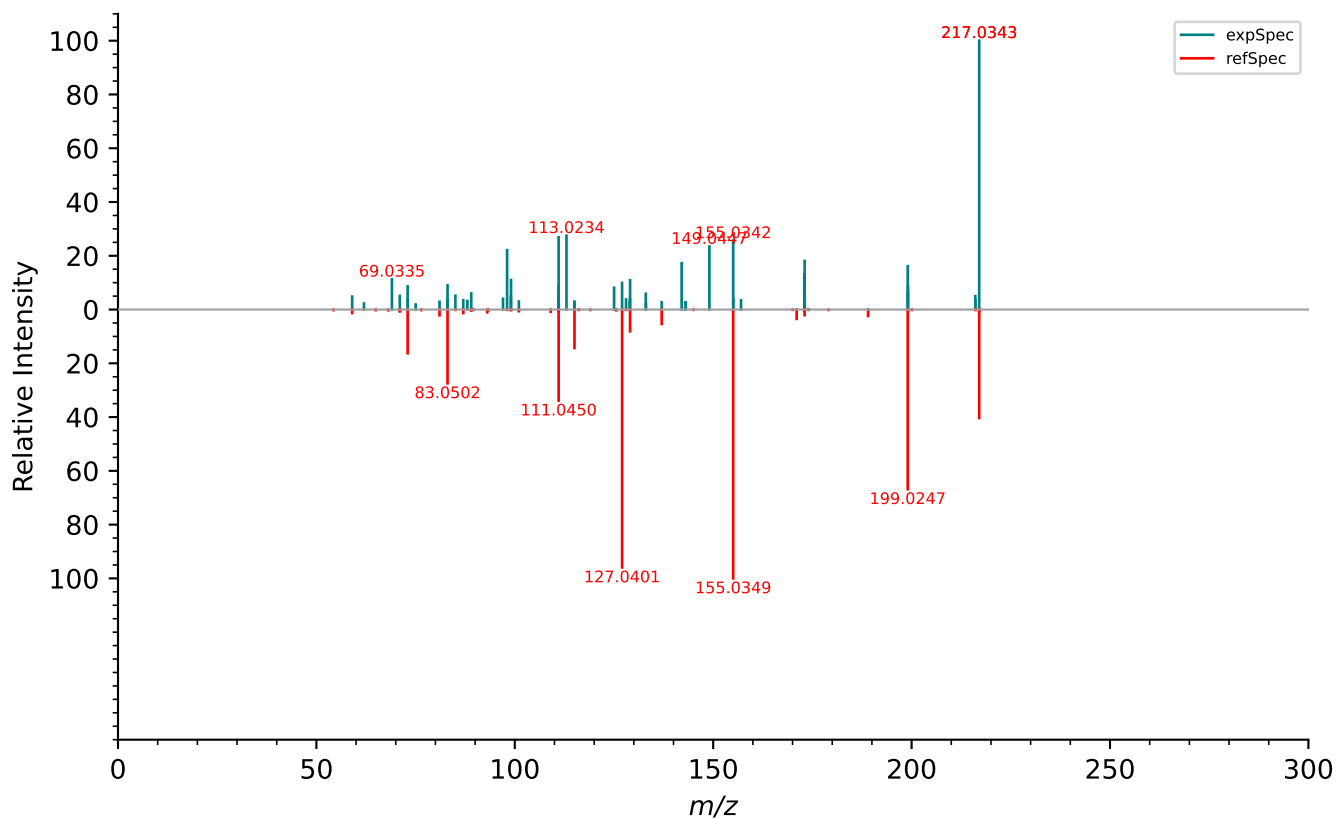

Supplement: identification_of_ingredients.zip [file compound00283.pdf › identification of ingredients/Data analysis/3.mass spectrometry/Original Ingredients/compound00283.pdf]

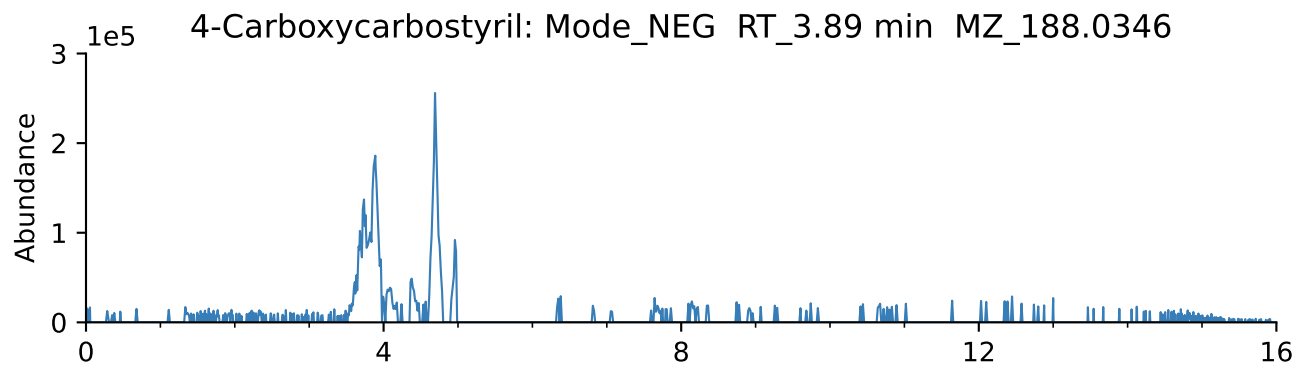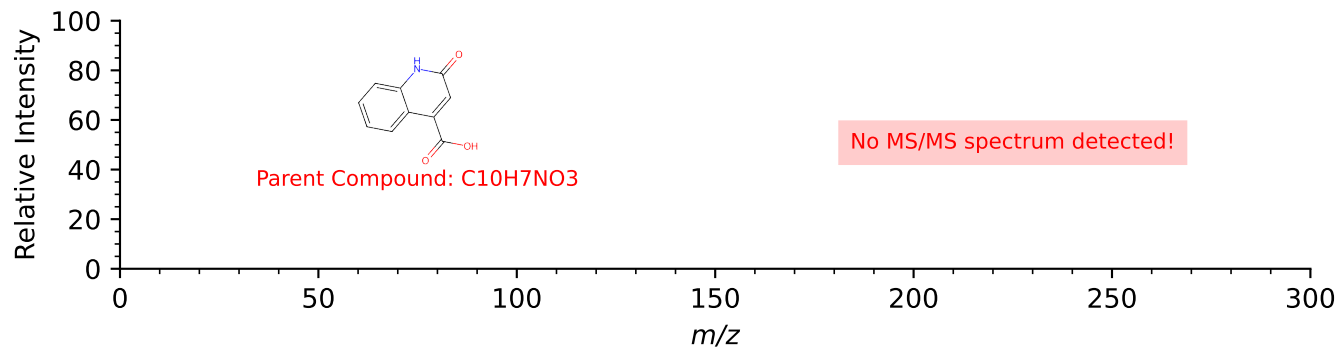

Supplement: identification_of_ingredients.zip [file compound00284.pdf › identification of ingredients/Data analysis/3.mass spectrometry/Original Ingredients/compound00284.pdf]

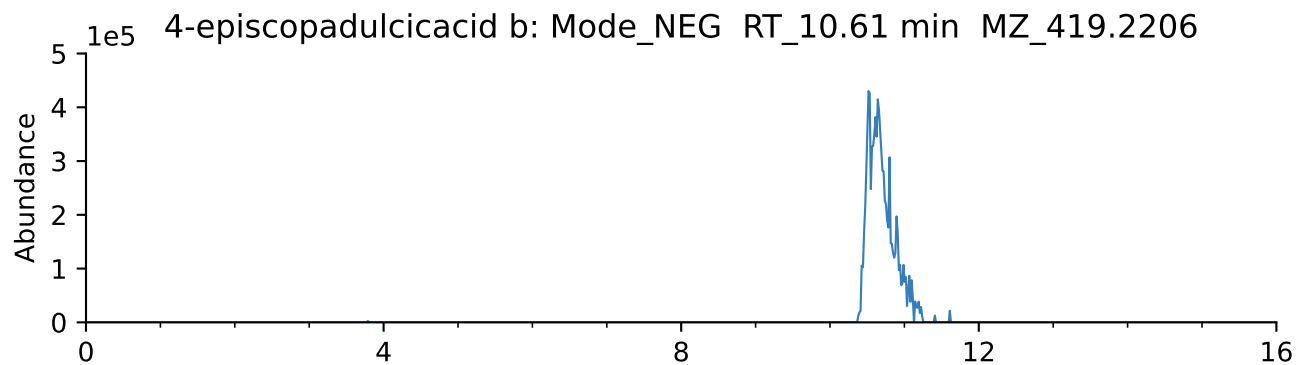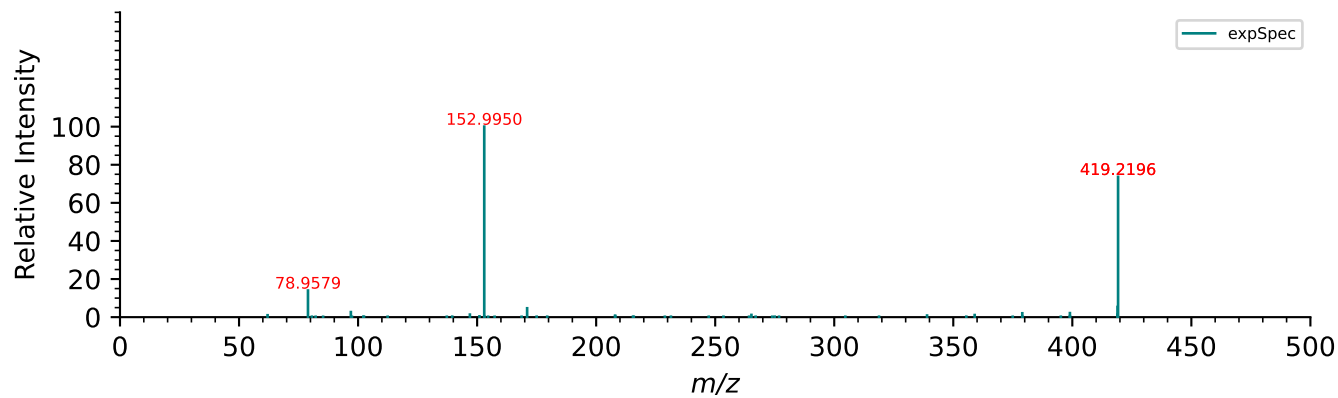

Supplement: identification_of_ingredients.zip [file compound00285.pdf › identification of ingredients/Data analysis/3.mass spectrometry/Original Ingredients/compound00285.pdf]

4-hydroxy-2-isopropenyl-5-methylene-h...: Mode\_NEG RT\_6.65 min MZ\_215.1284

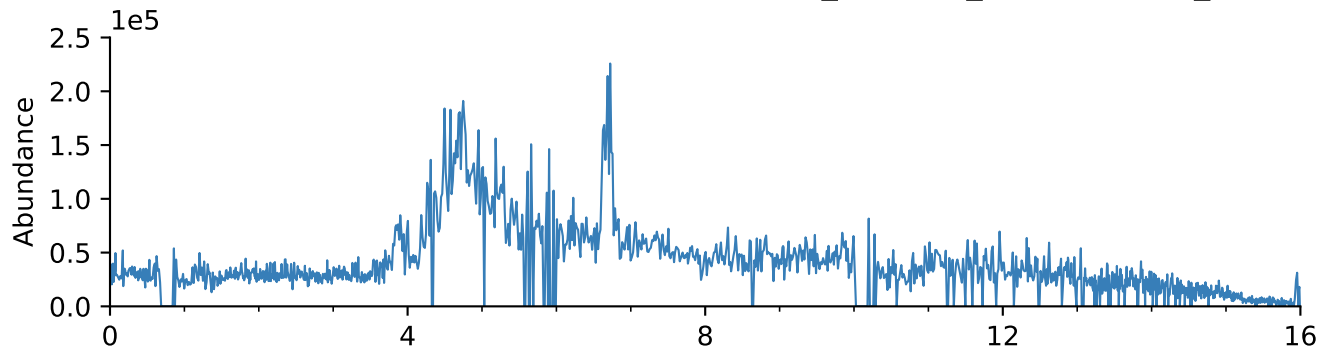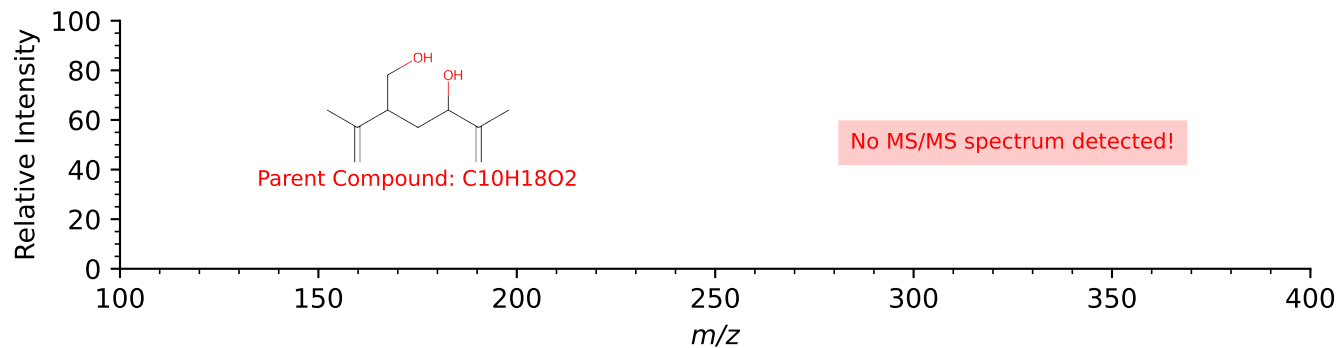

Supplement: identification_of_ingredients.zip [file compound00286.pdf › identification of ingredients/Data analysis/3.mass spectrometry/Original Ingredients/compound00286.pdf]

5-Pentadec-8-enylbenzene-1,3-diol: Mode\_POS RT\_12.90 min MZ\_336.2891

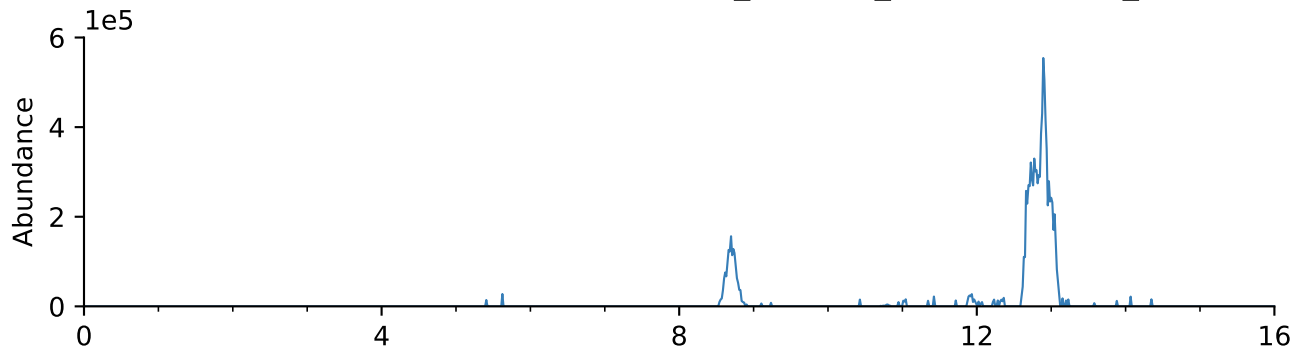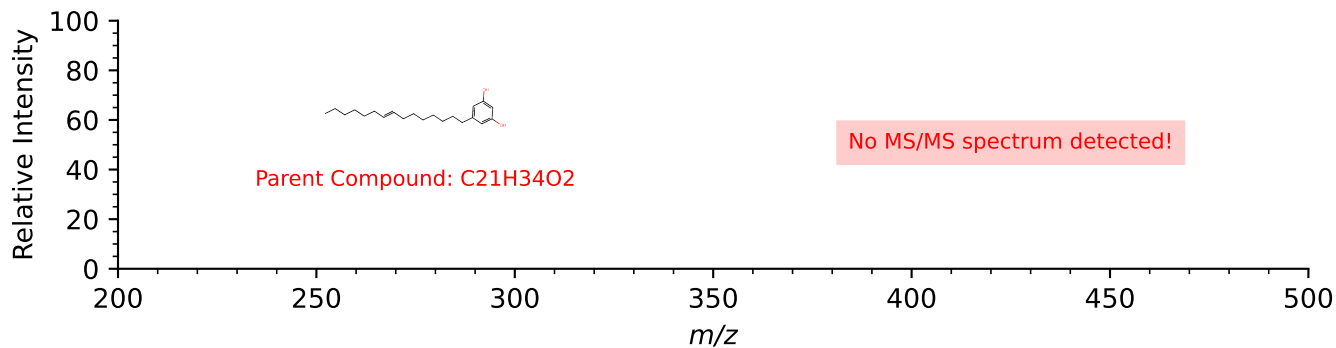

Supplement: identification_of_ingredients.zip [file compound00289.pdf › identification of ingredients/Data analysis/3.mass spectrometry/Original Ingredients/compound00289.pdf]

5 $\alpha$ ,9 $\alpha$ -epidioxy-(22e)-ergosta-7,22-die...: Mode\_NEG RT\_13.34 min MZ\_443.3167

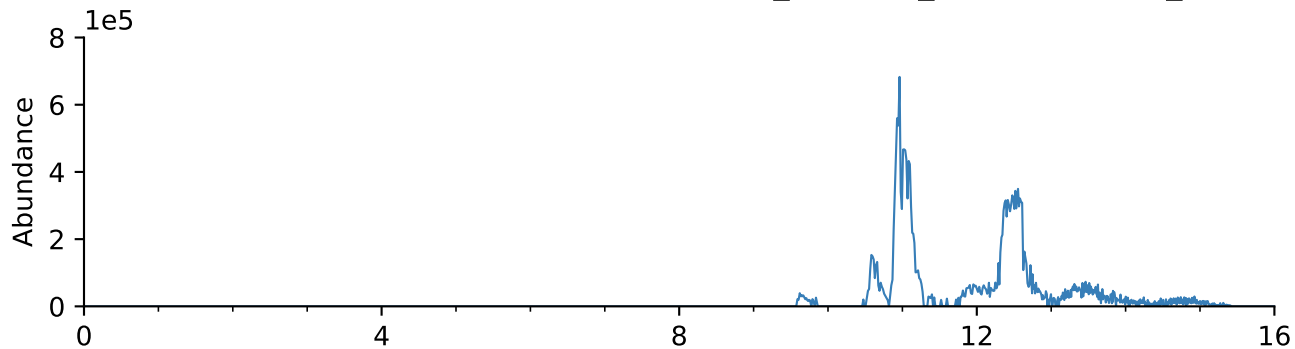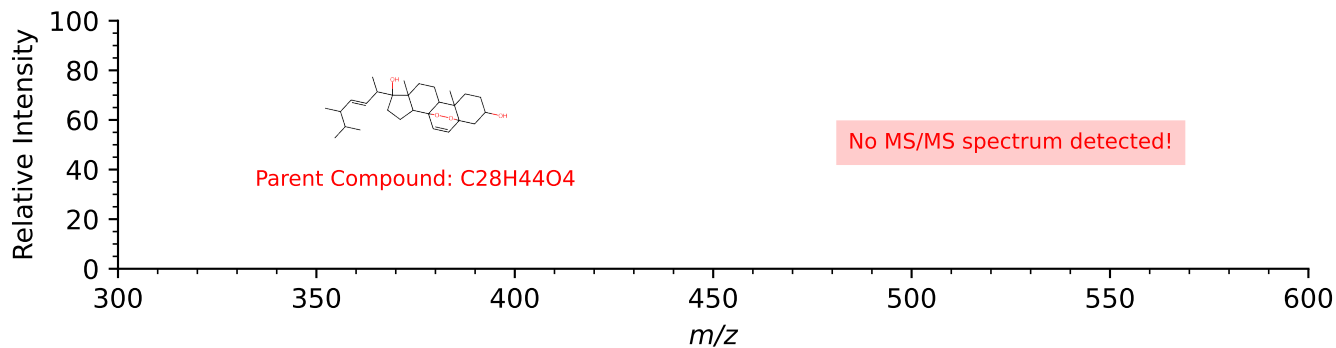

Supplement: identification_of_ingredients.zip [file compound00290.pdf › identification of ingredients/Data analysis/3.mass spectrometry/Original Ingredients/compound00290.pdf]

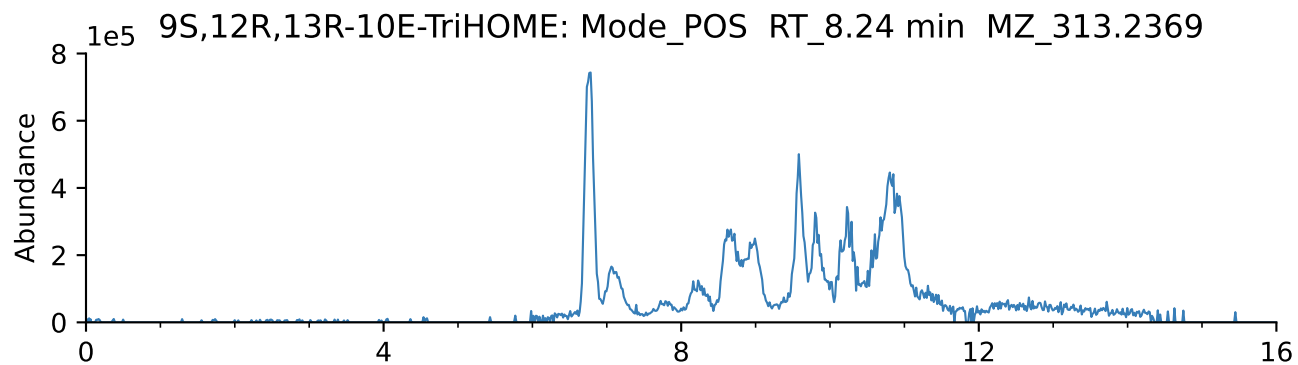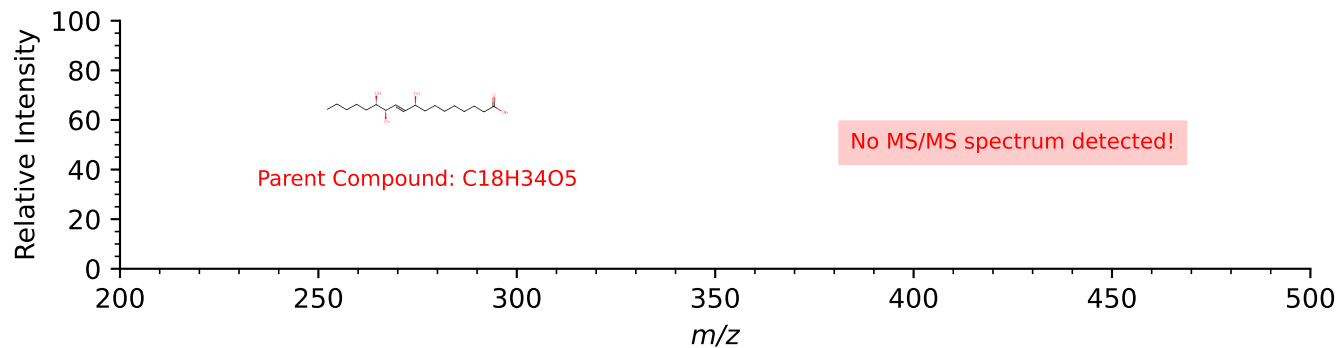

Supplement: identification_of_ingredients.zip [file compound00295.pdf › identification of ingredients/Data analysis/3.mass spectrometry/Original Ingredients/compound00295.pdf]

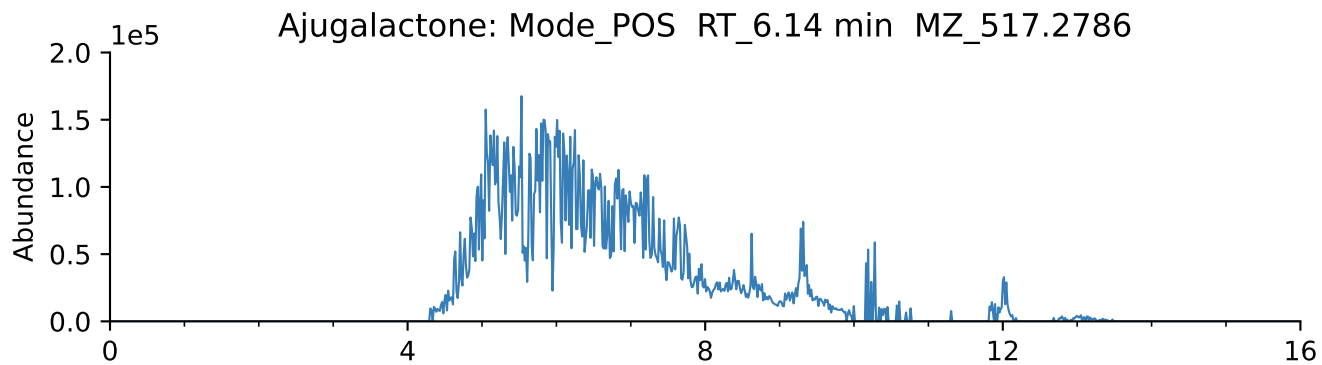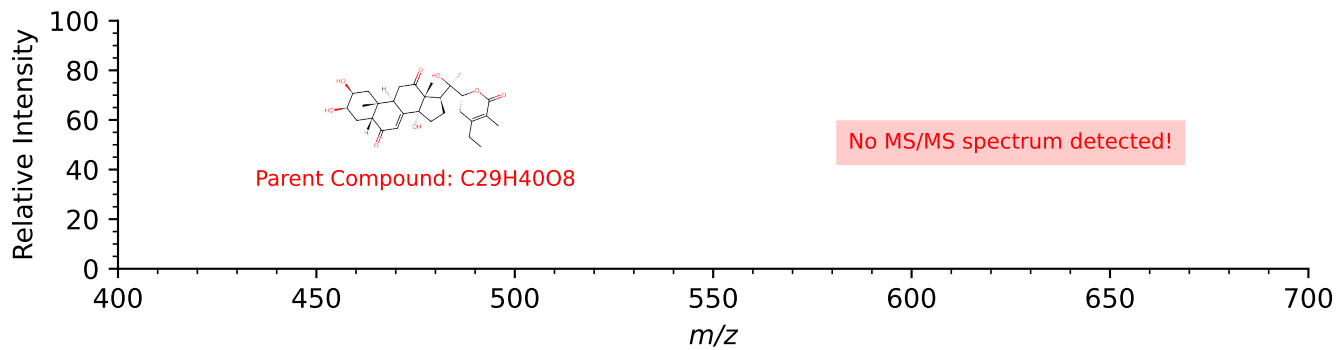

Supplement: identification_of_ingredients.zip [file compound00296.pdf › identification of ingredients/Data analysis/3.mass spectrometry/Original Ingredients/compound00296.pdf]

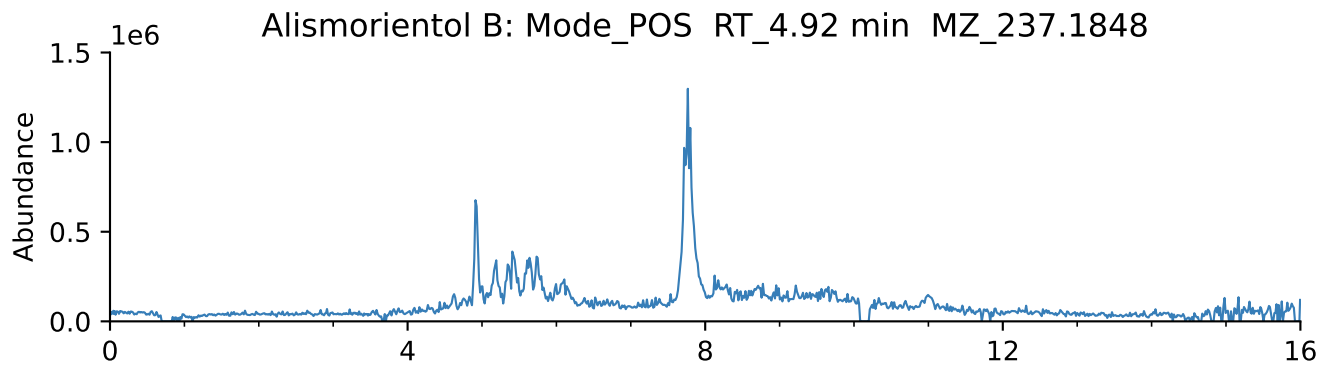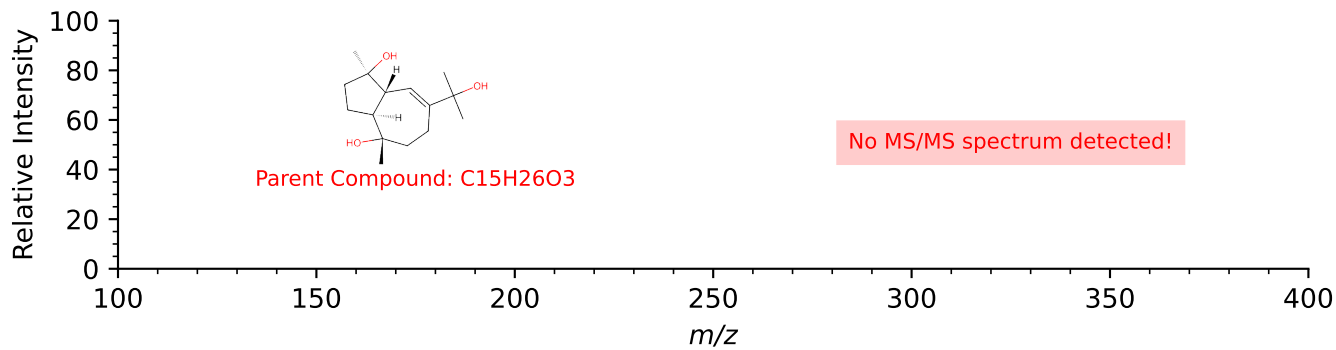

Supplement: identification_of_ingredients.zip [file compound00298.pdf › identification of ingredients/Data analysis/3.mass spectrometry/Original Ingredients/compound00298.pdf]

9-hydroxy-4-[(7-methoxy-2-oxochromen-....: Mode\_NEG RT\_8.41 min MZ\_389.0666

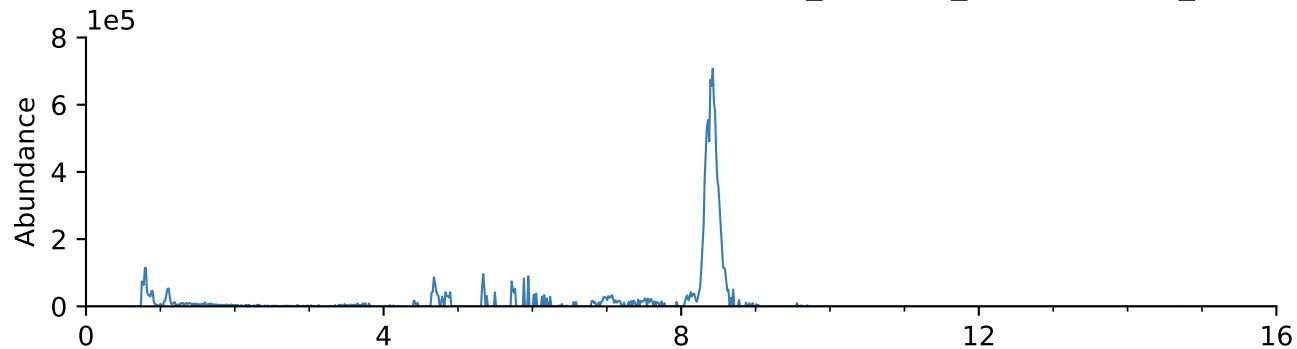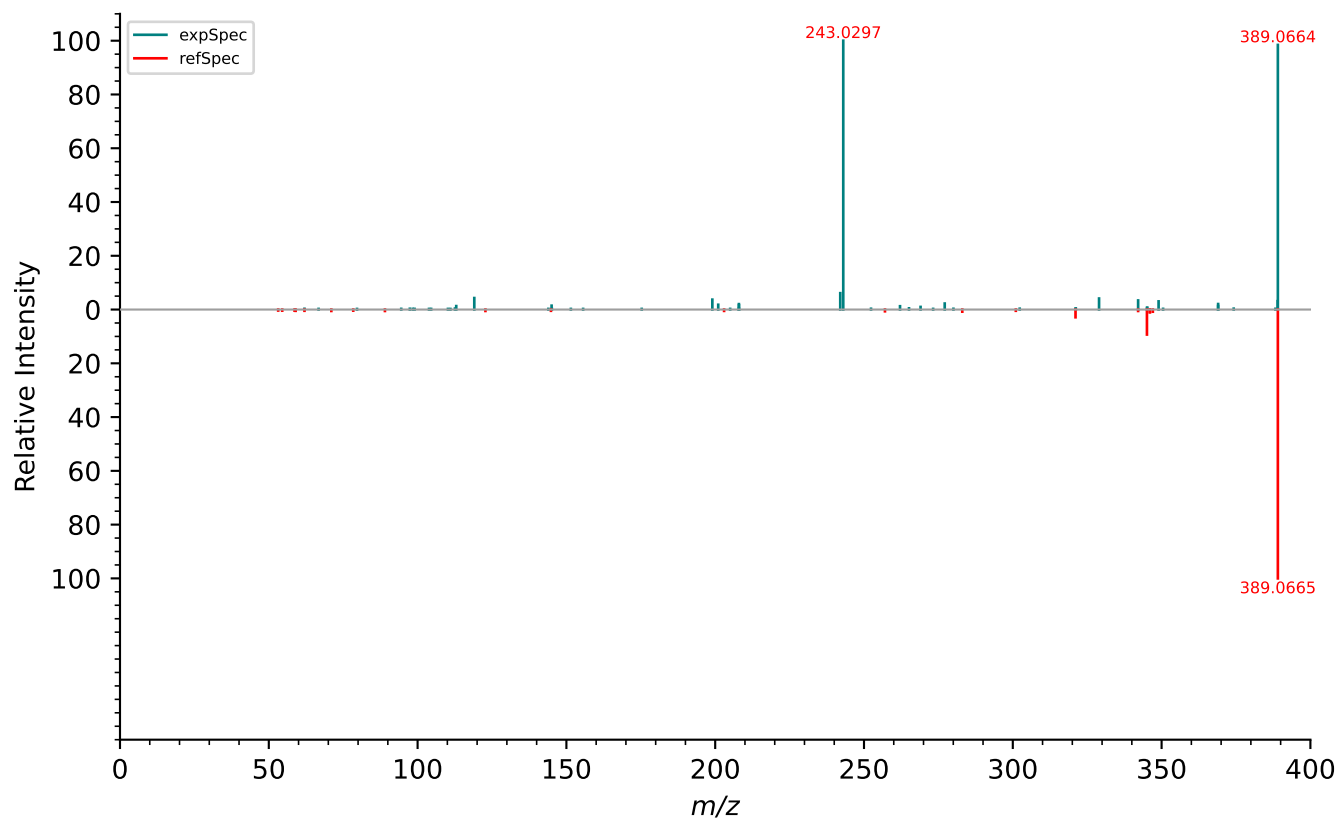

Supplement: identification_of_ingredients.zip [file compound00305.pdf › identification of ingredients/Data analysis/3.mass spectrometry/Original Ingredients/compound00305.pdf]

9,10,11-trihydroxyoctadeca-12,15-dien...: Mode\_NEG RT\_8.18 min MZ\_327.2177

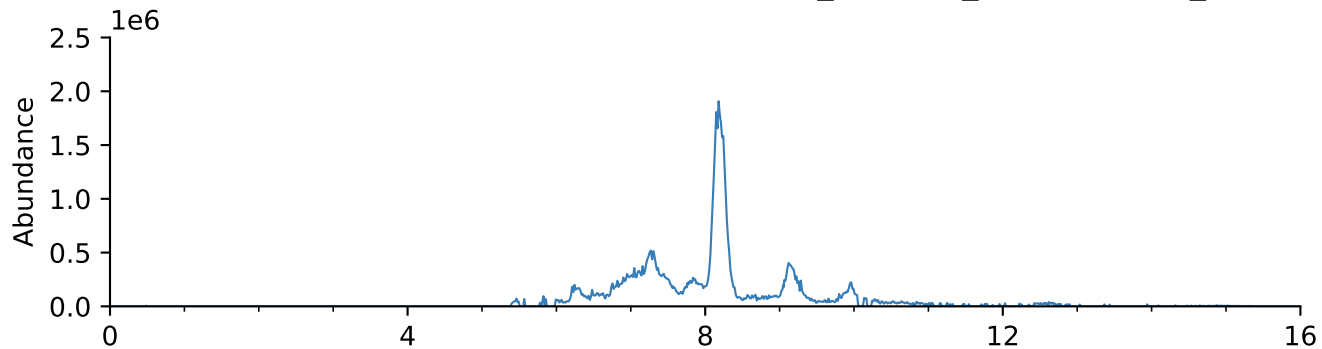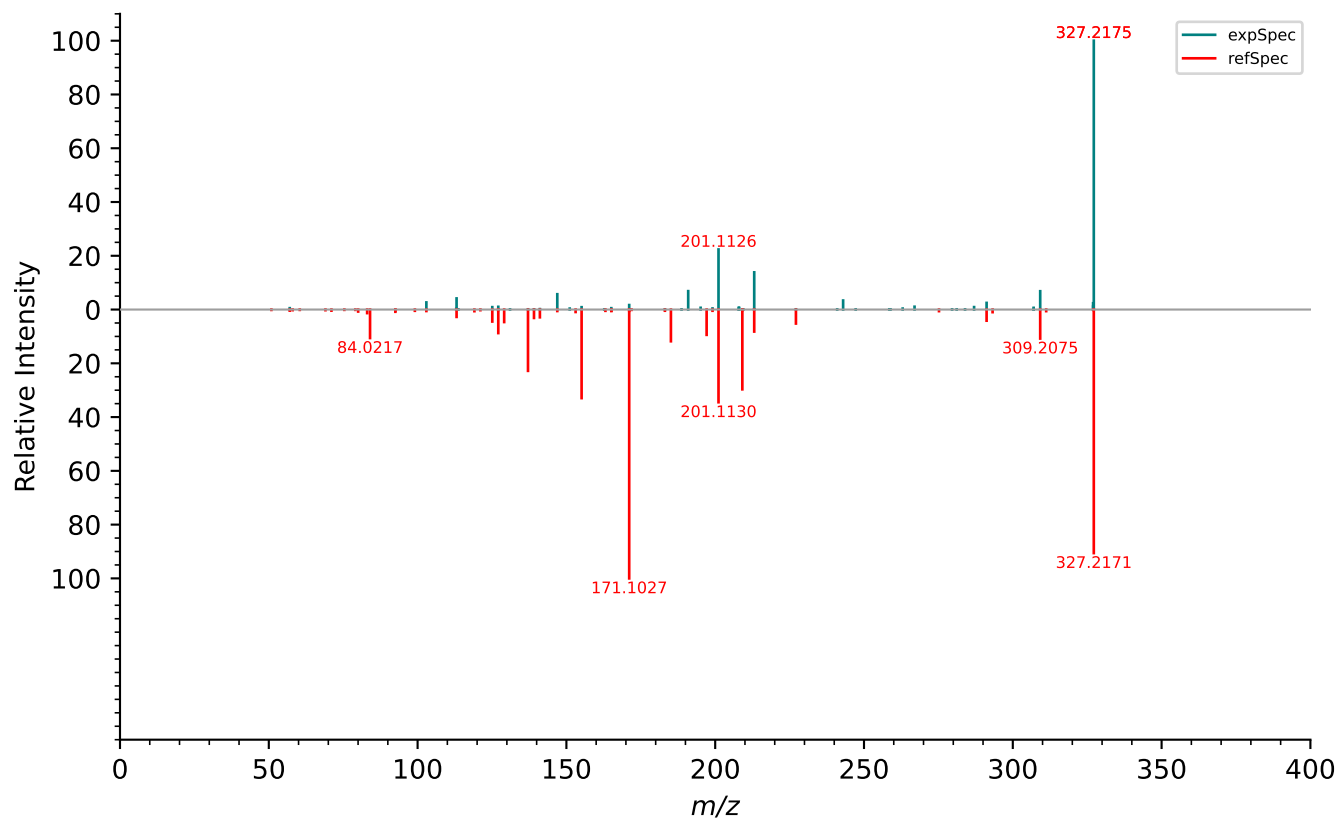

Supplement: identification_of_ingredients.zip [file compound00306.pdf › identification of ingredients/Data analysis/3.mass spectrometry/Original Ingredients/compound00306.pdf]

6-methoxy-7-hydroxy-3,7'-bicoumarin: Mode\_NEG RT\_7.51 min MZ\_335.0561

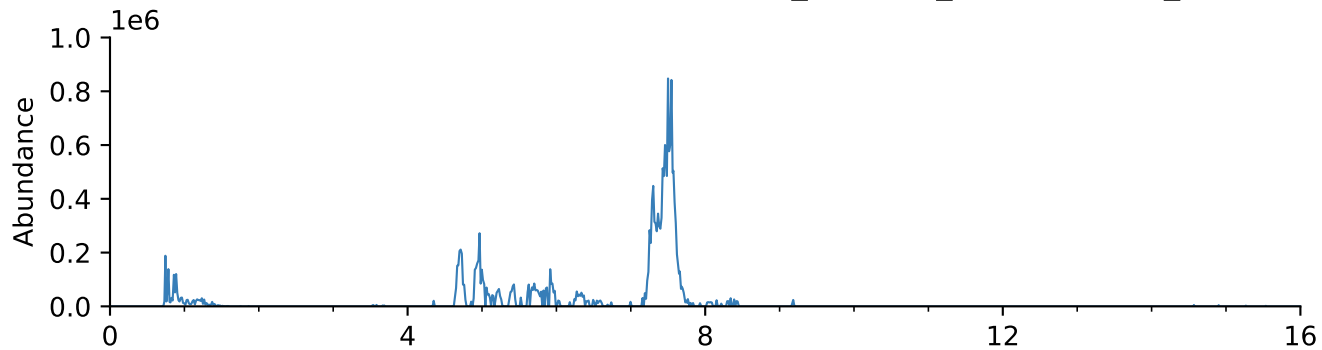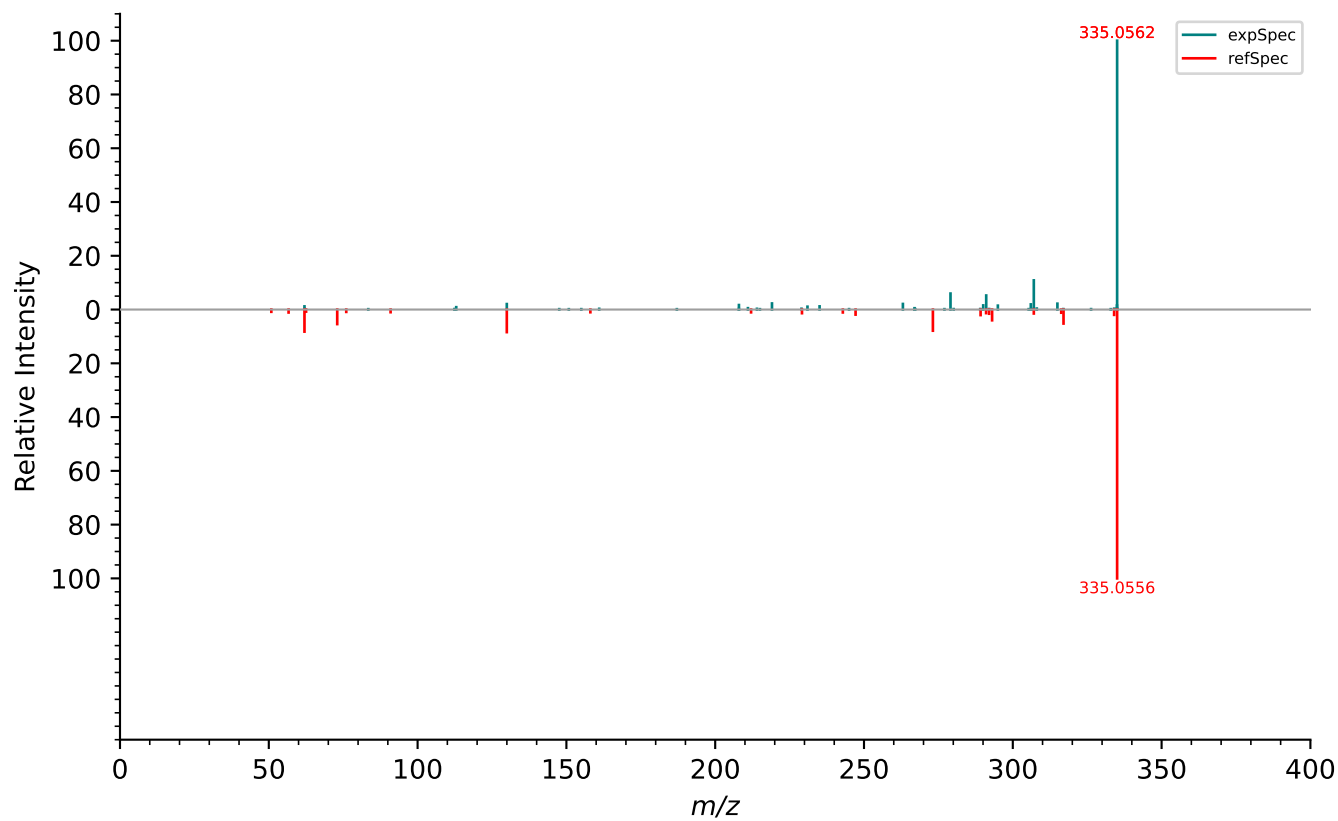

Supplement: identification_of_ingredients.zip [file compound00307.pdf › identification of ingredients/Data analysis/3.mass spectrometry/Original Ingredients/compound00307.pdf]

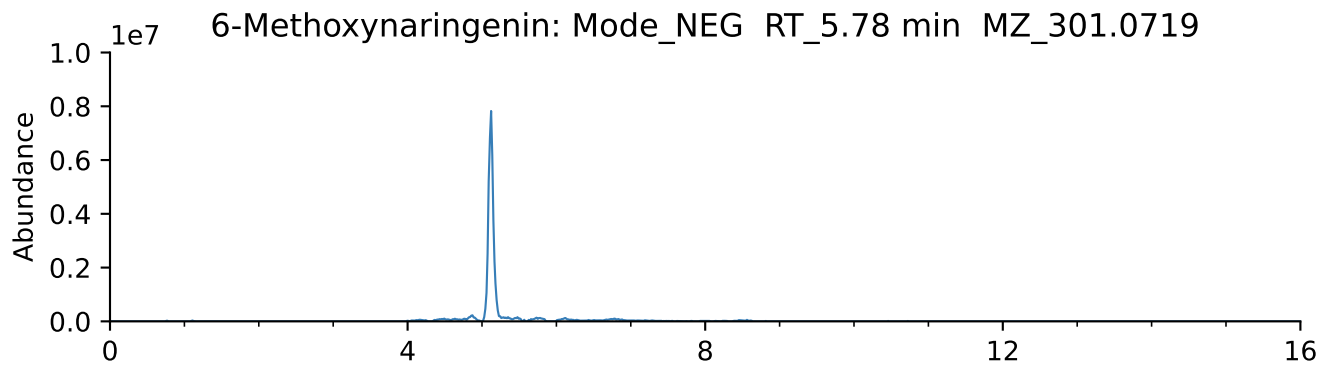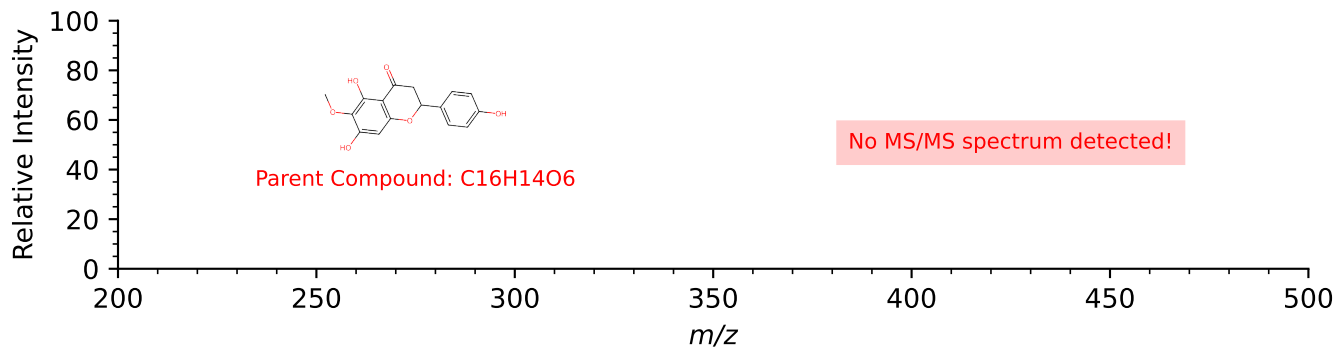

Supplement: identification_of_ingredients.zip [file compound00308.pdf › identification of ingredients/Data analysis/3.mass spectrometry/Original Ingredients/compound00308.pdf]

9,10-Secocholesta-5,7,10-triene-3,24,...: Mode\_POS RT\_11.22 min MZ\_399.3253

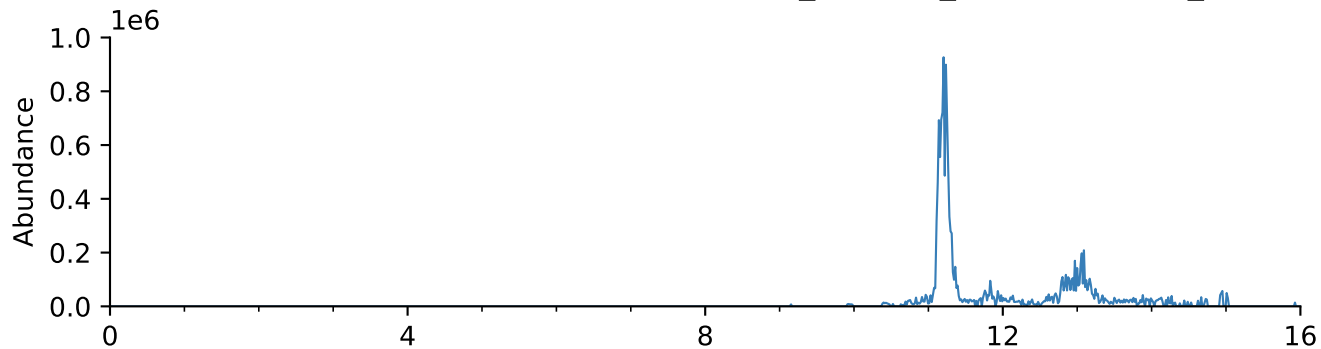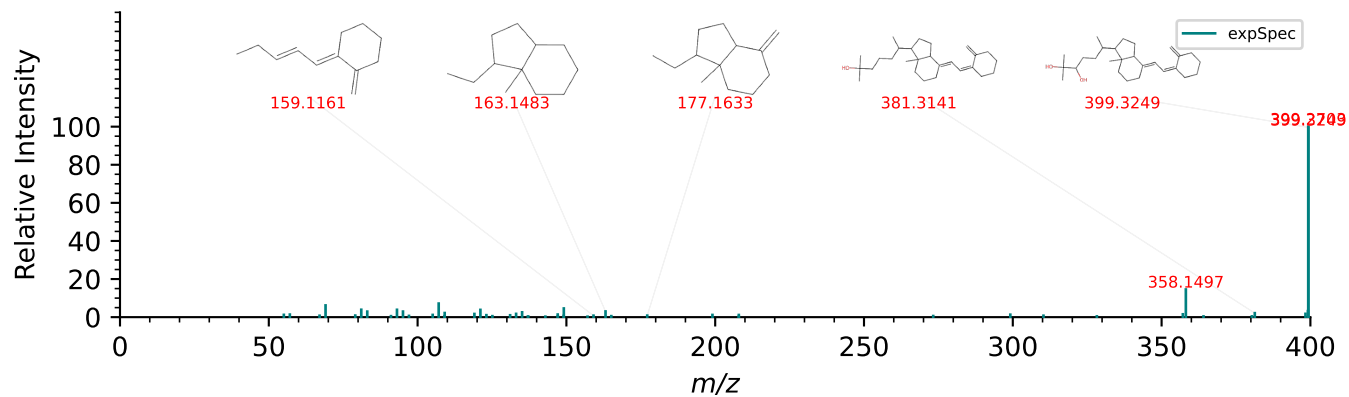

Supplement: identification_of_ingredients.zip [file compound00311.pdf › identification of ingredients/Data analysis/3.mass spectrometry/Original Ingredients/compound00311.pdf]

7-hydroxy-6,8-dimethoxychromen-4-one: Mode\_NEG RT\_5.54 min MZ\_203.0343

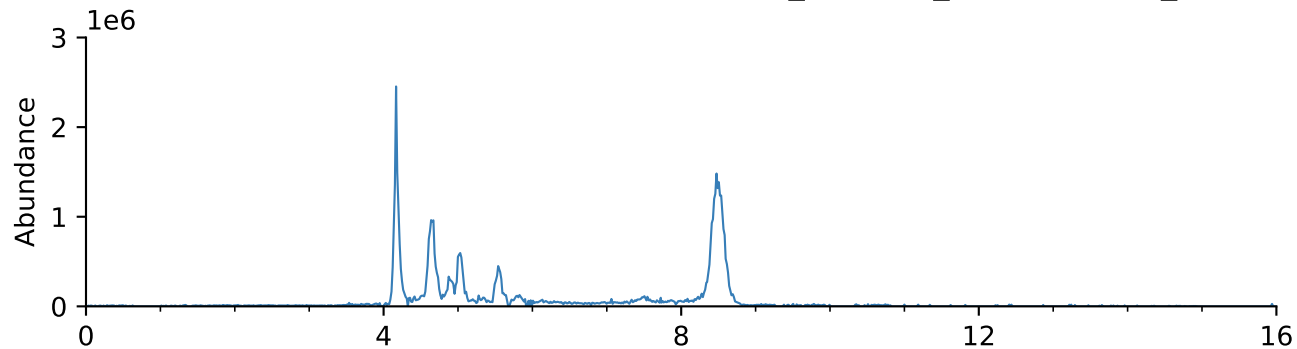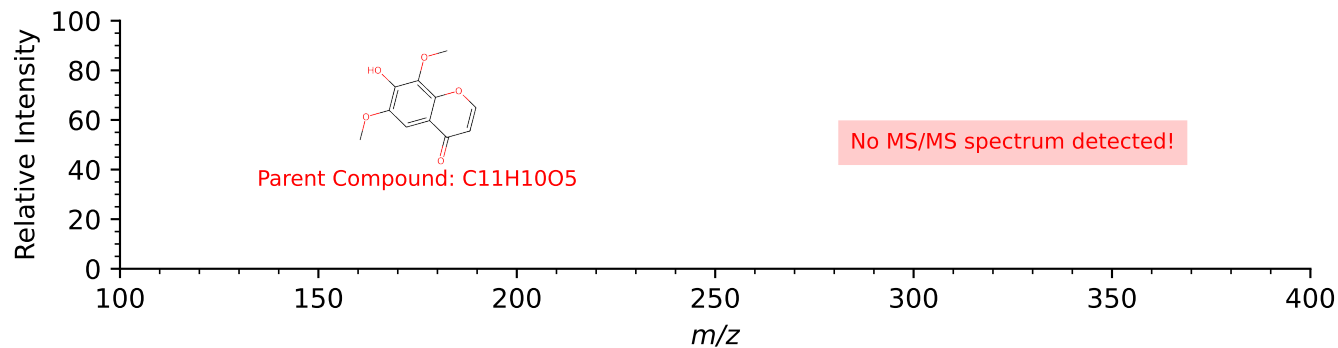

Supplement: identification_of_ingredients.zip [file compound00312.pdf › identification of ingredients/Data analysis/3.mass spectrometry/Original Ingredients/compound00312.pdf]

8,11,12-trihydroxyoctadec-9-enoic acid: Mode\_NEG RT\_8.64 min MZ\_329.2333

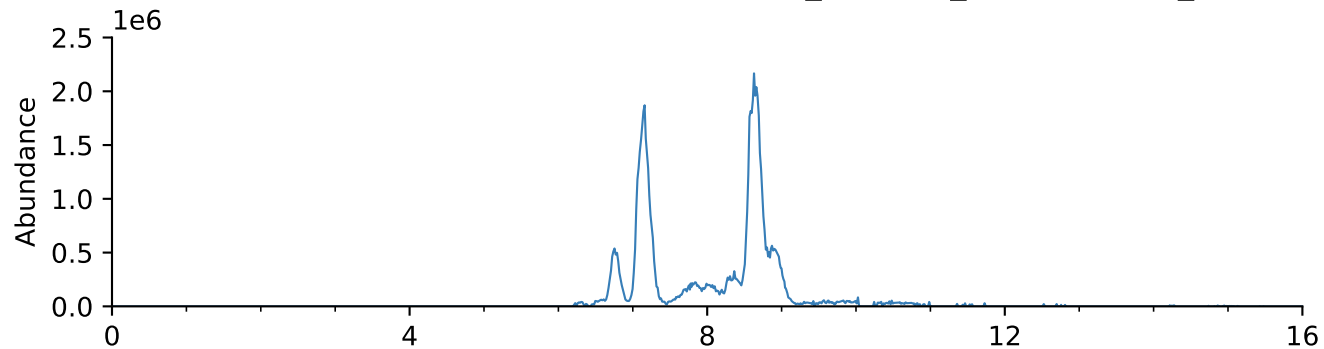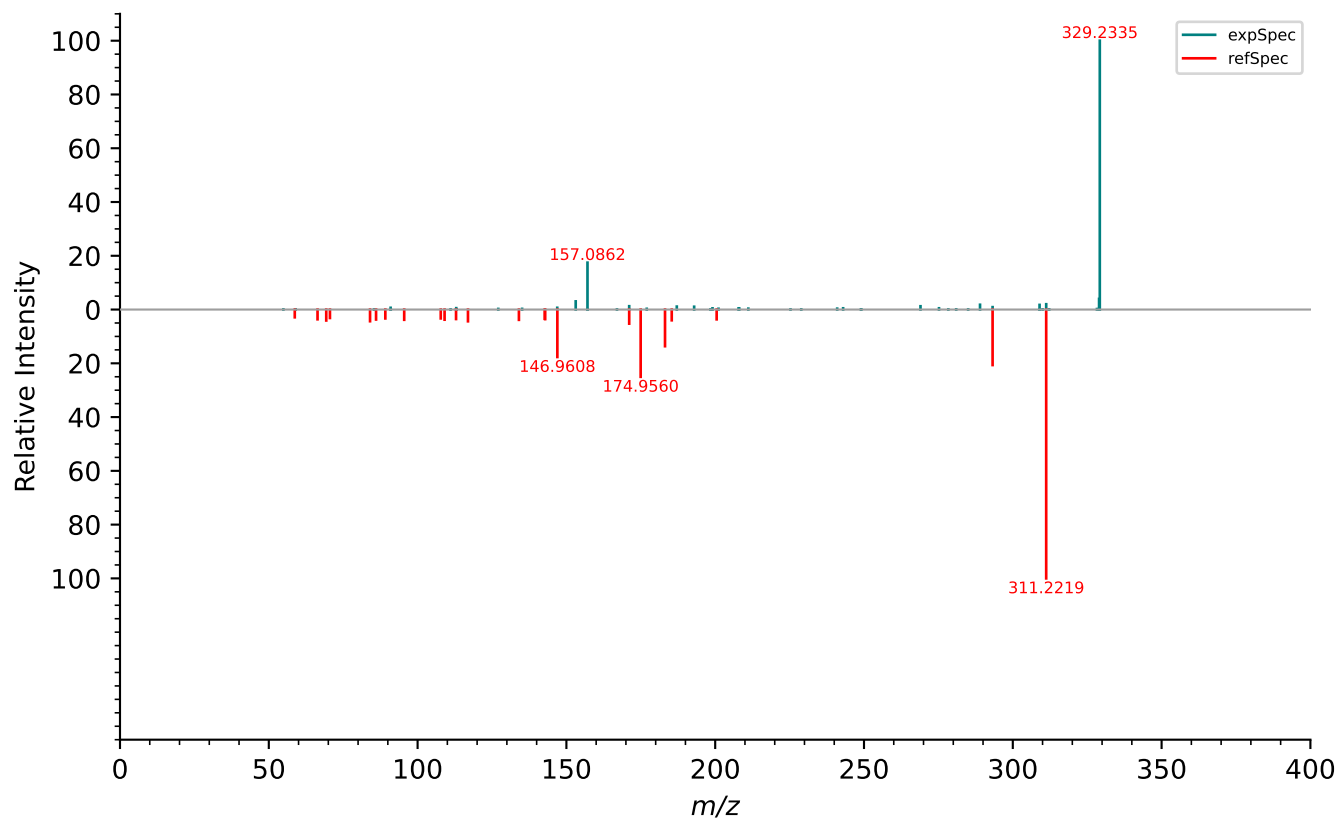

Supplement: identification_of_ingredients.zip [file compound00313.pdf › identification of ingredients/Data analysis/3.mass spectrometry/Original Ingredients/compound00313.pdf]

8,11,13-Abietatriene-3beta-ol: Mode\_NEG RT\_12.07 min MZ\_331.2278

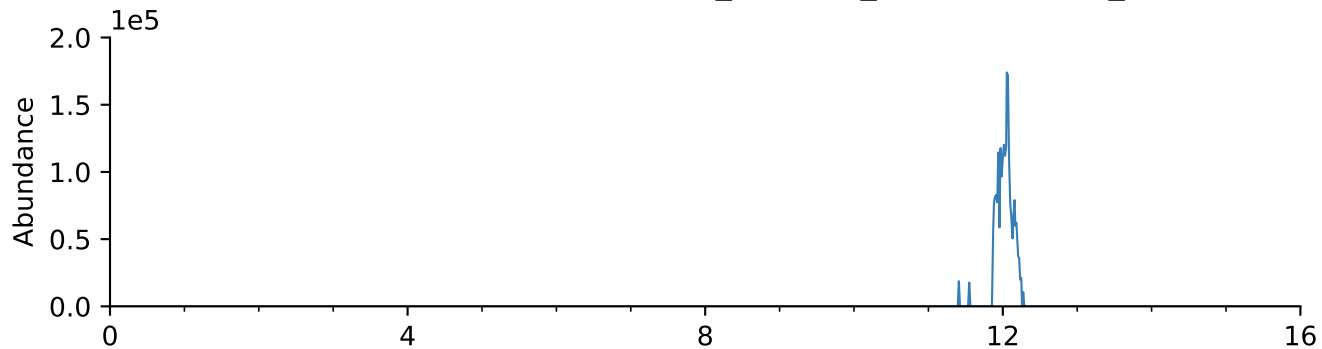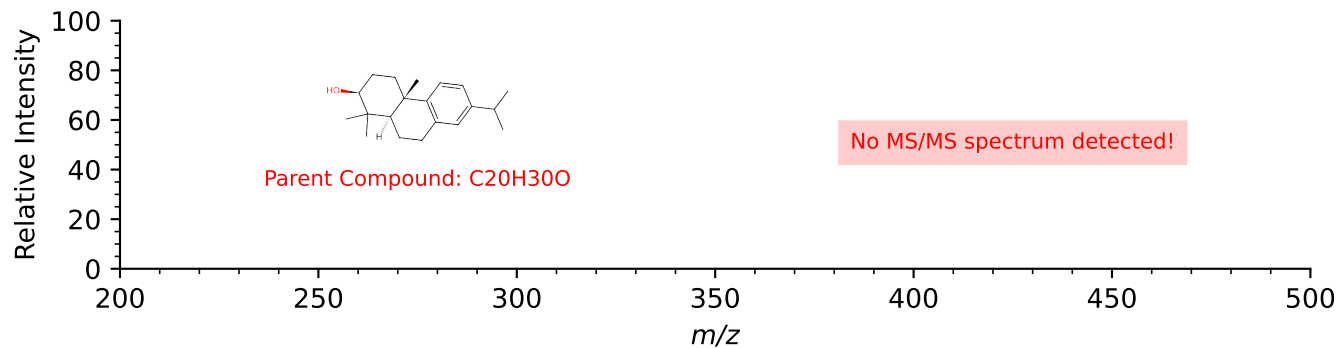

Supplement: identification_of_ingredients.zip [file compound00314.pdf › identification of ingredients/Data analysis/3.mass spectrometry/Original Ingredients/compound00314.pdf]

9(S)-HOT: Mode\_POS RT\_10.17 min MZ\_295.2261

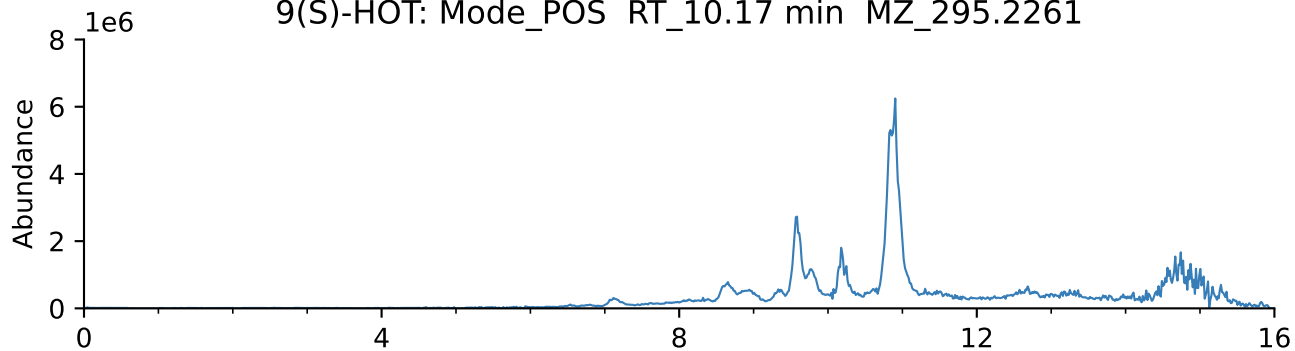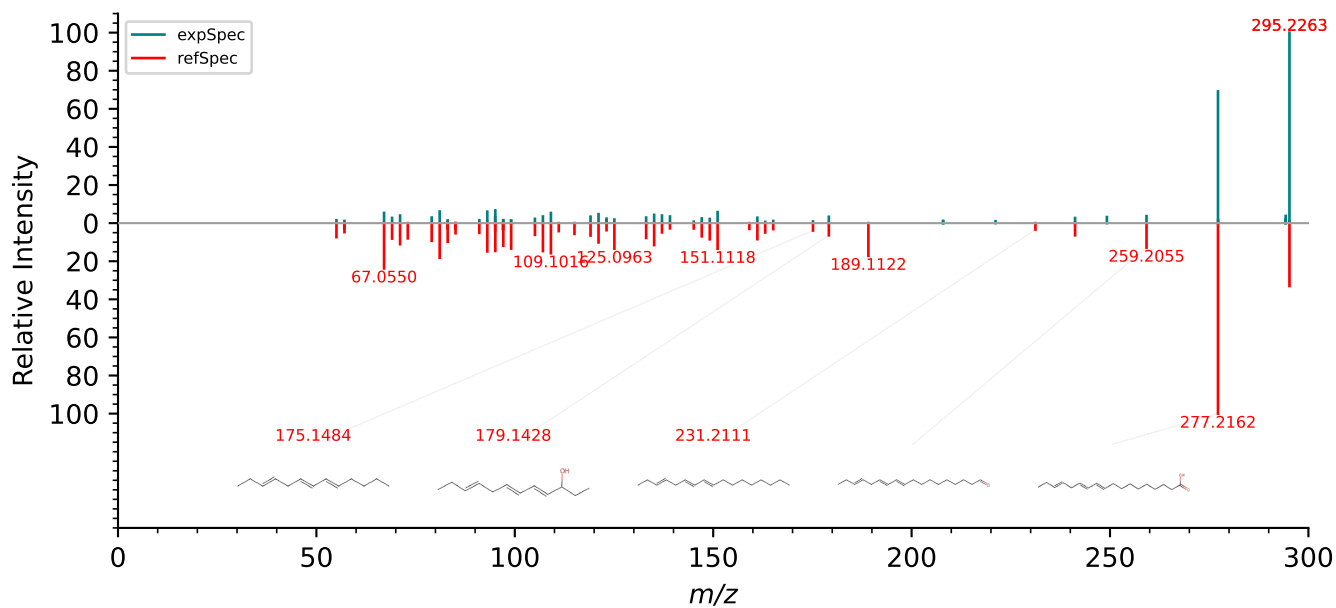

Supplement: identification_of_ingredients.zip [file compound00318.pdf › identification of ingredients/Data analysis/3.mass spectrometry/Original Ingredients/compound00318.pdf]

7-O-Methylluteolin-6-C-beta-glucoside qt: Mode\_NEG RT\_5.94 min MZ\_299.0559

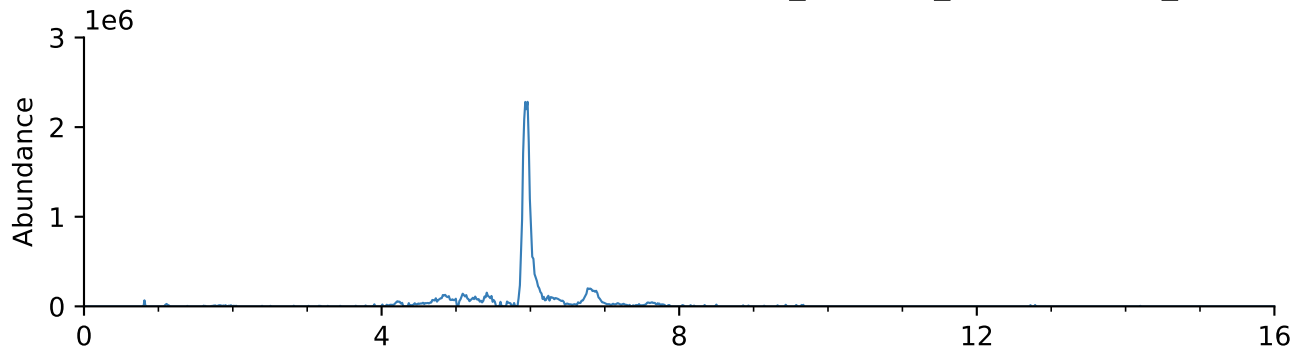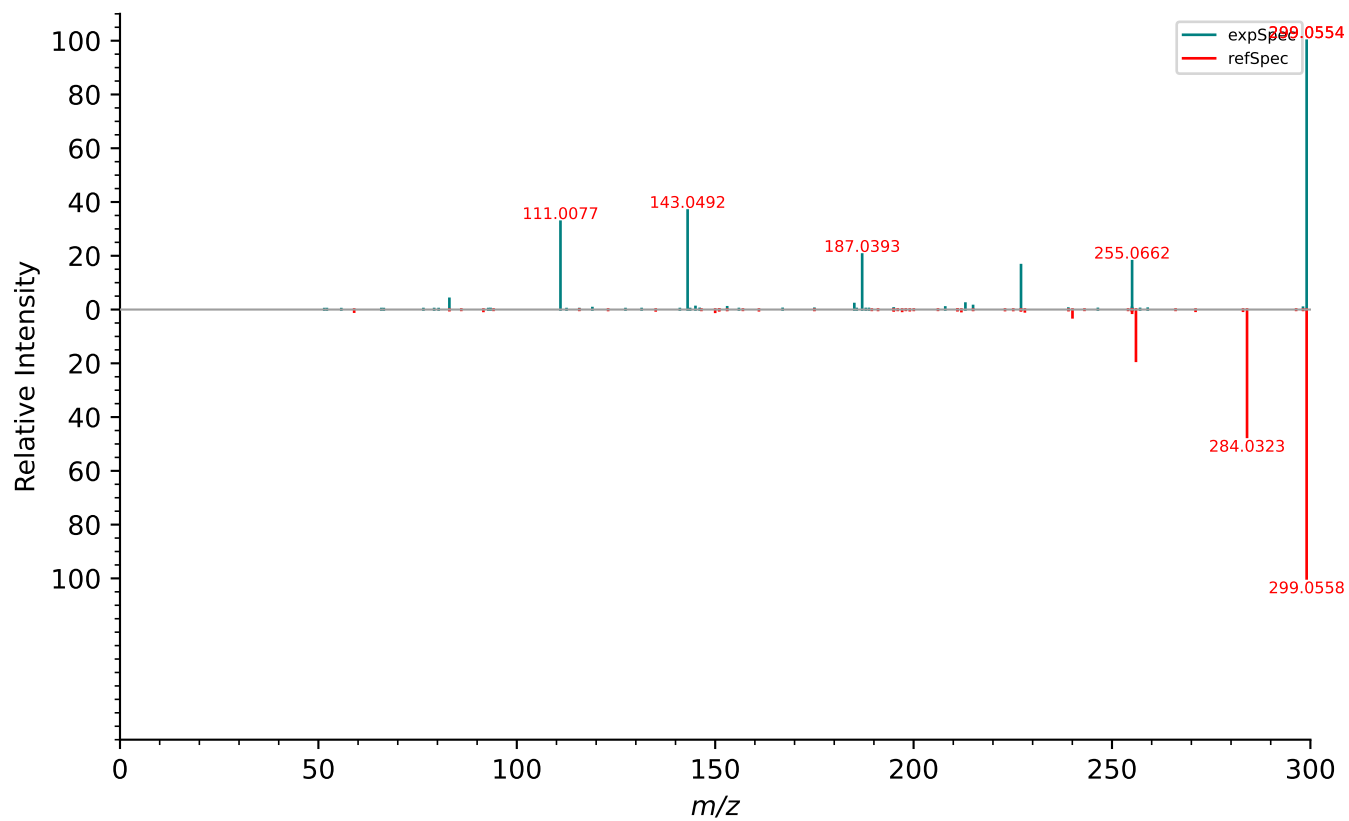

Supplement: identification_of_ingredients.zip [file compound00319.pdf › identification of ingredients/Data analysis/3.mass spectrometry/Original Ingredients/compound00319.pdf]

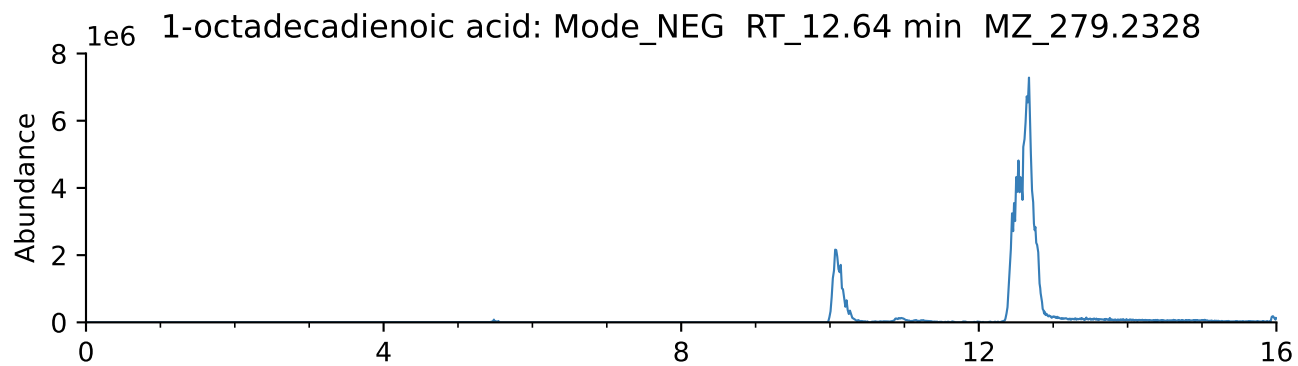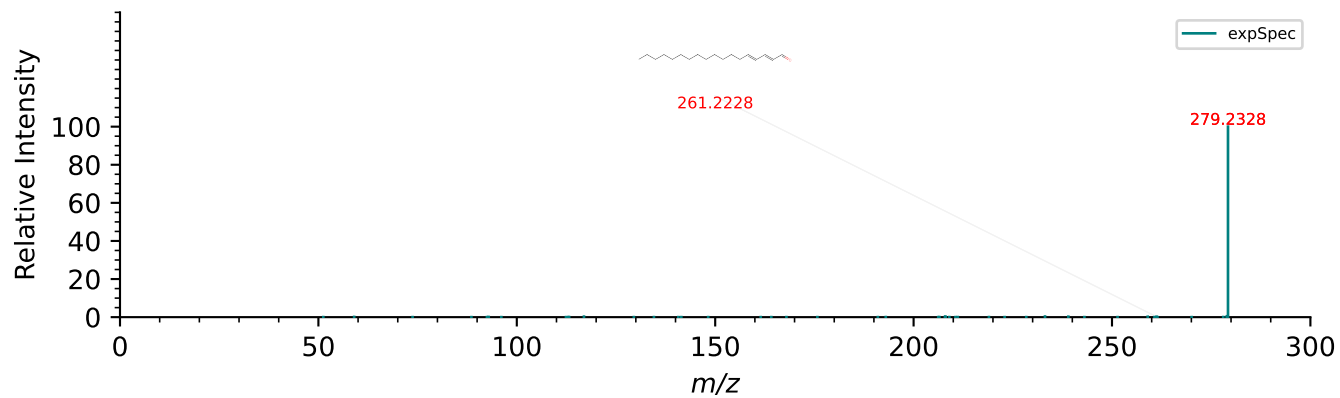

Supplement: identification_of_ingredients.zip [file compound00324.pdf › identification of ingredients/Data analysis/3.mass spectrometry/Original Ingredients/compound00324.pdf]

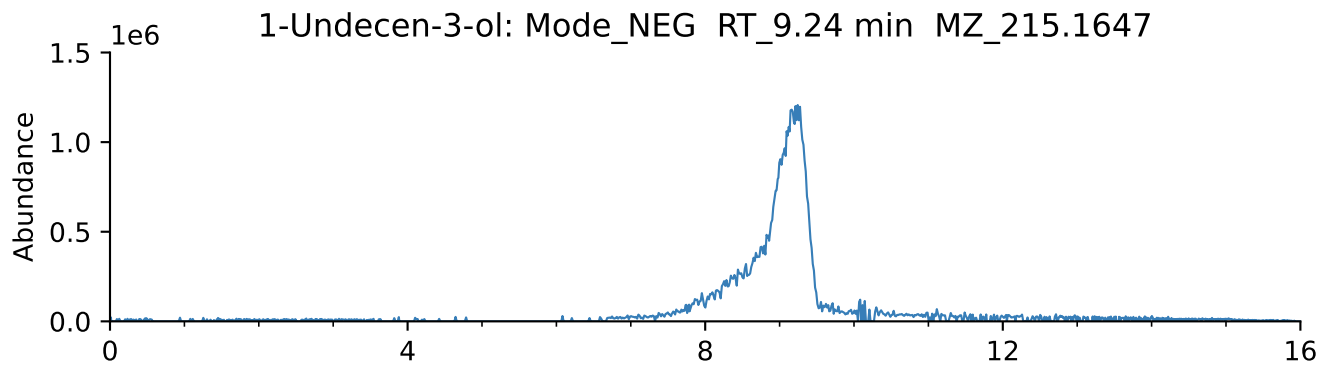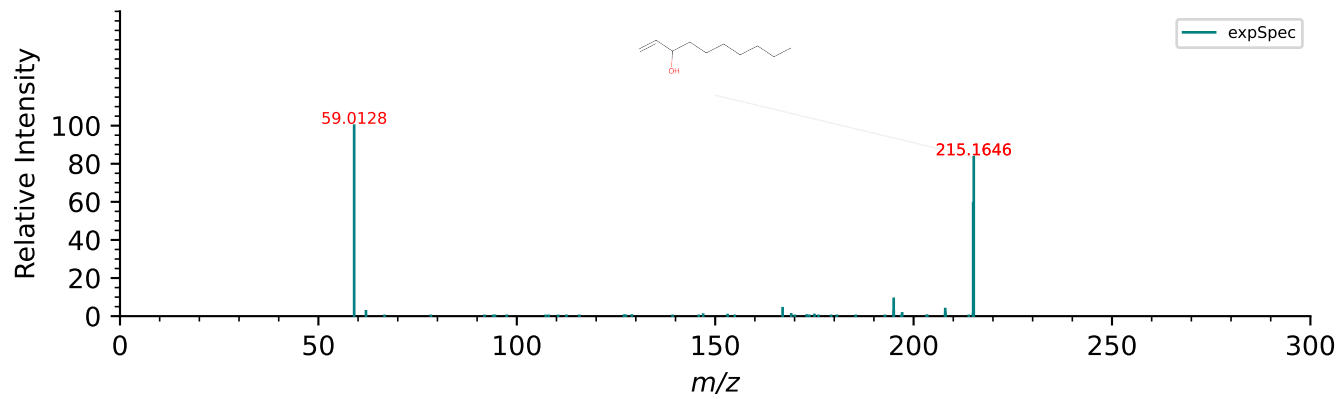

Supplement: identification_of_ingredients.zip [file compound00325.pdf › identification of ingredients/Data analysis/3.mass spectrometry/Original Ingredients/compound00325.pdf]

1-Hydroxy-5,11(13)-eudesmadien-12,8-o...: Mode\_POS RT\_7.09 min MZ\_231.1379

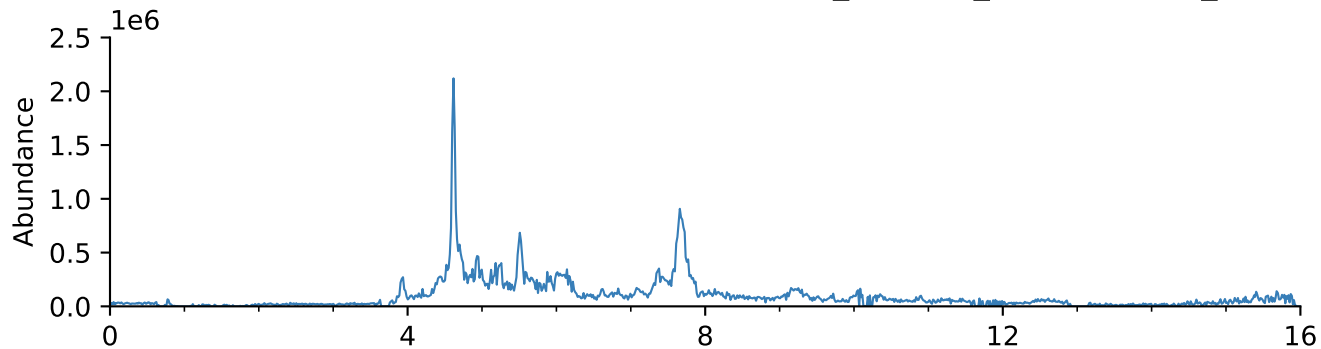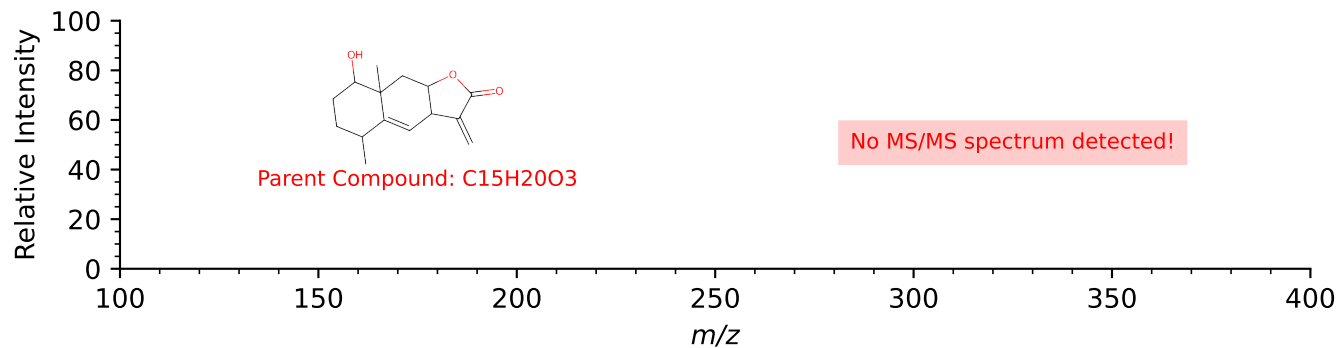

Supplement: identification_of_ingredients.zip [file compound00328.pdf › identification of ingredients/Data analysis/3.mass spectrometry/Original Ingredients/compound00328.pdf]

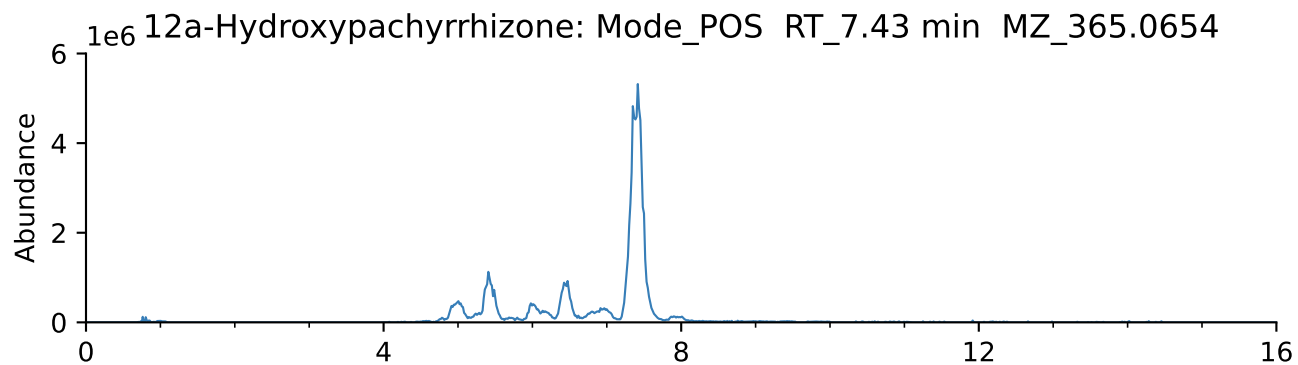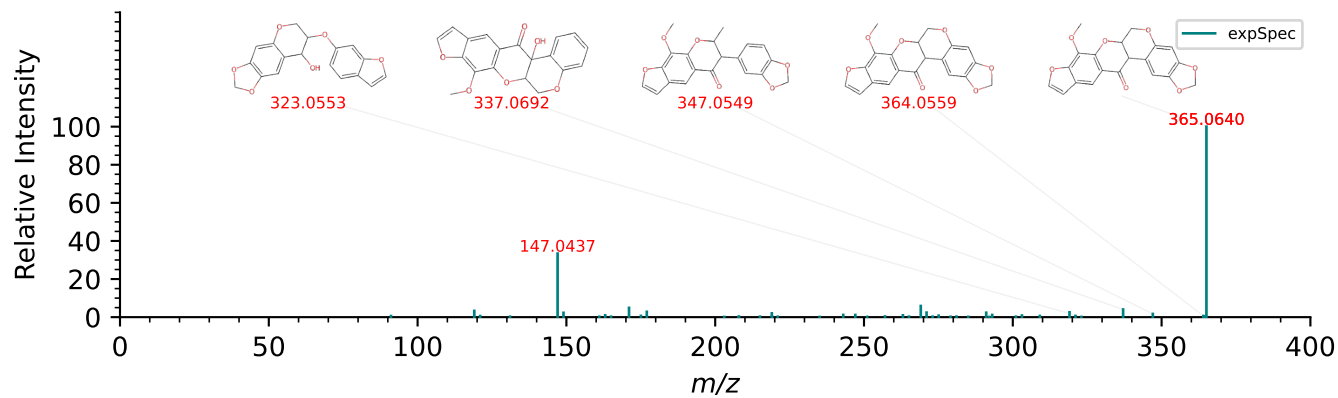

Supplement: identification_of_ingredients.zip [file compound00329.pdf › identification of ingredients/Data analysis/3.mass spectrometry/Original Ingredients/compound00329.pdf]

14,15-dinor-13-oxo-8(17)-labden-19-oi...: Mode\_NEG RT\_10.55 min MZ\_351.2178

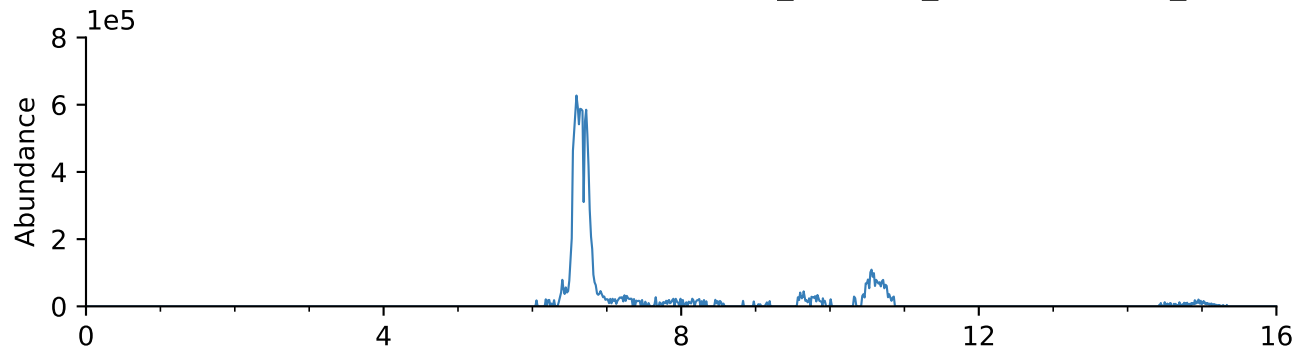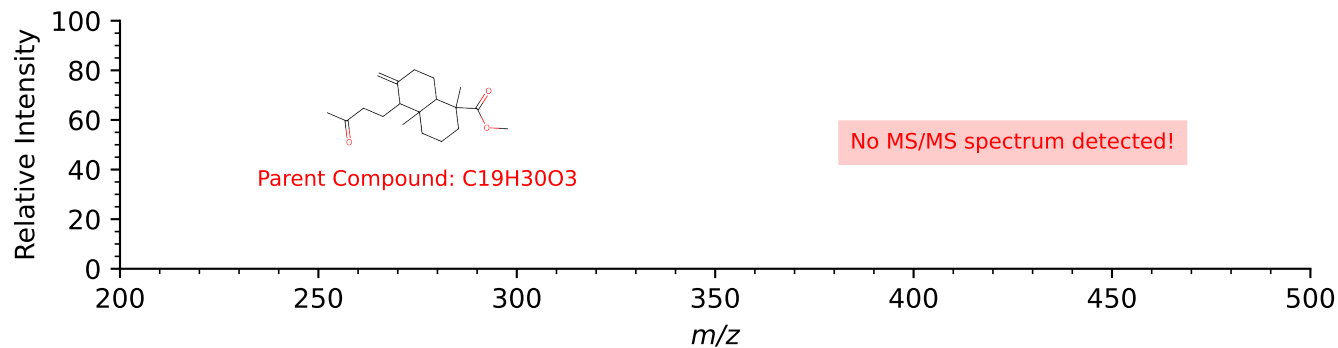

Supplement: identification_of_ingredients.zip [file compound00330.pdf › identification of ingredients/Data analysis/3.mass spectrometry/Original Ingredients/compound00330.pdf]

15-Hydroxydehydroabietic acid, methyl...: Mode\_POS RT\_10.59 min MZ\_353.2086

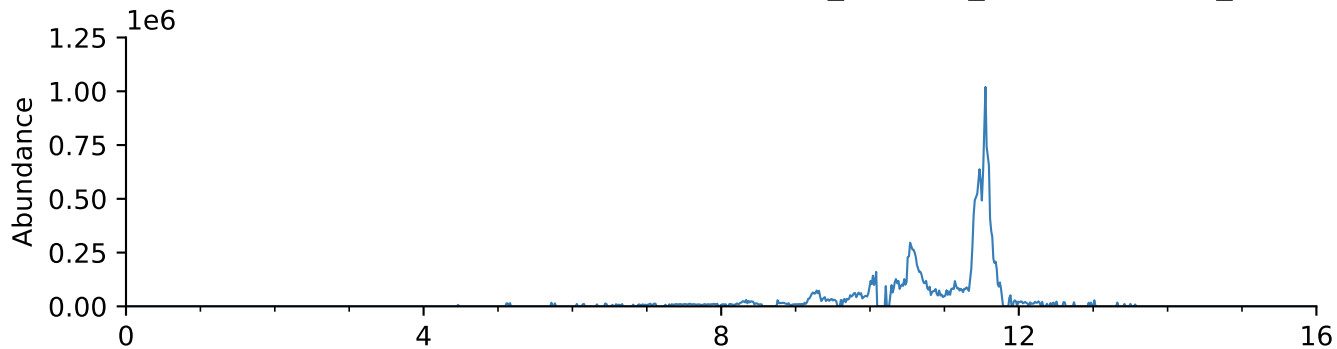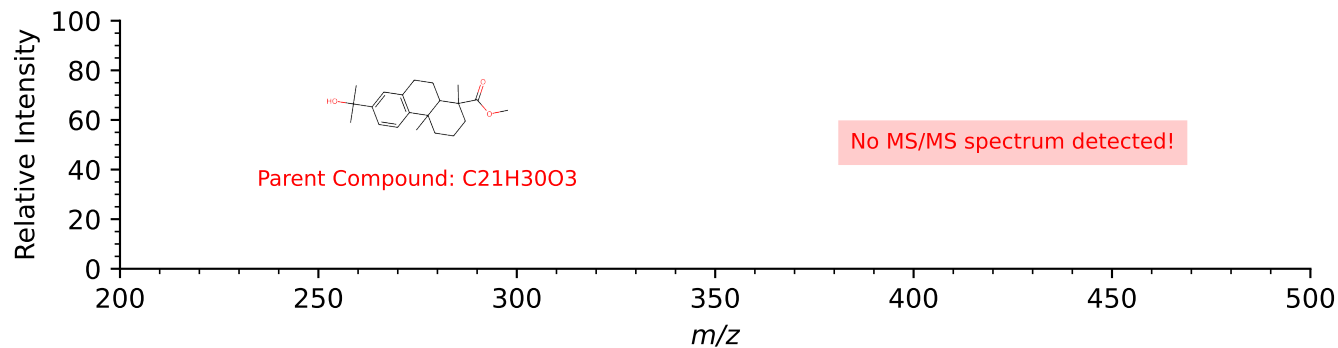

Supplement: identification_of_ingredients.zip [file compound00332.pdf › identification of ingredients/Data analysis/3.mass spectrometry/Original Ingredients/compound00332.pdf]

18- hydroxy-7-oxo-15,16-epoxy friedol...: Mode\_POS RT\_9.24 min MZ\_317.2106

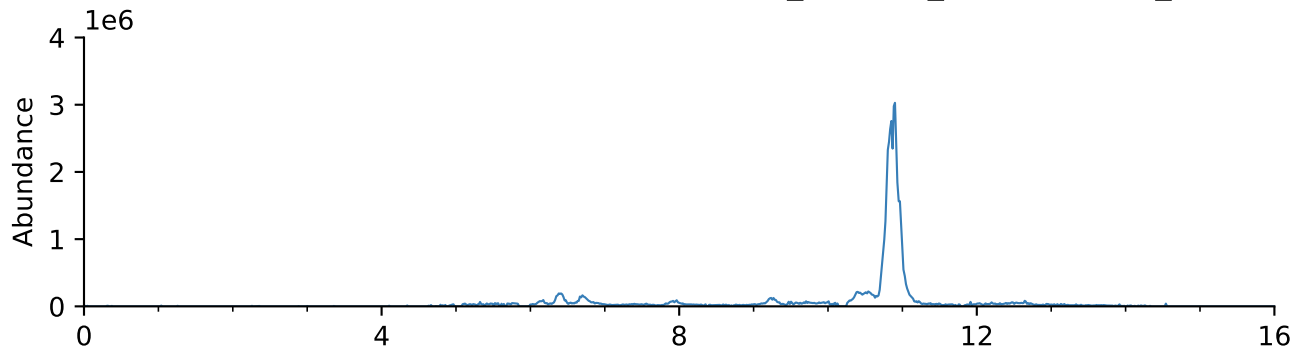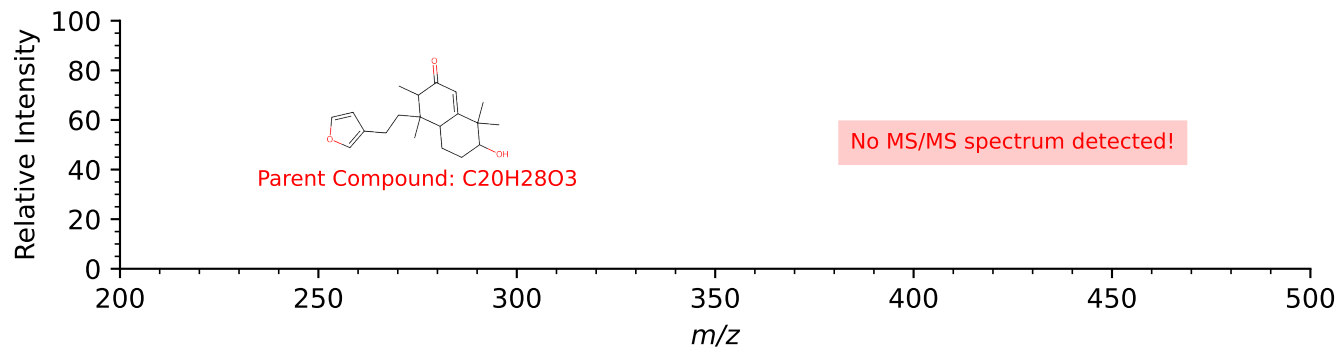

Supplement: identification_of_ingredients.zip [file compound00335.pdf › identification of ingredients/Data analysis/3.mass spectrometry/Original Ingredients/compound00335.pdf]

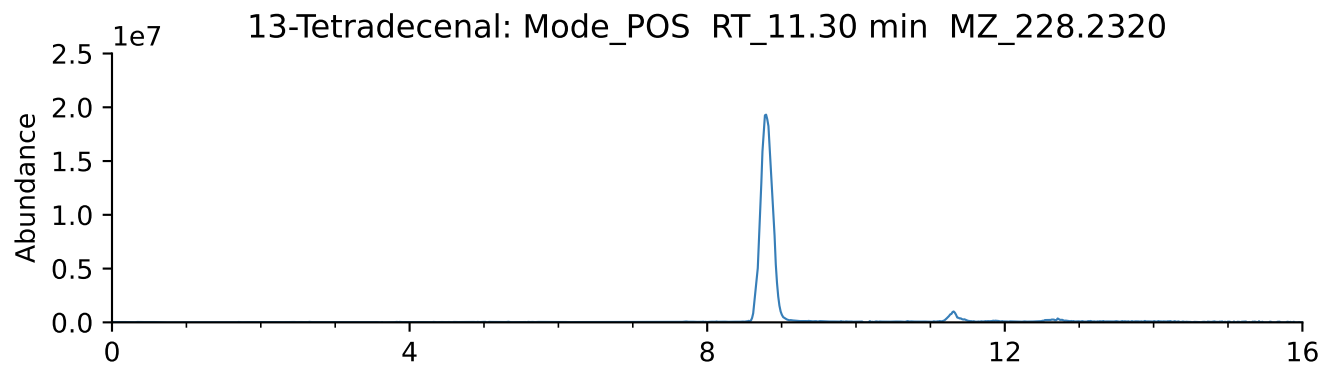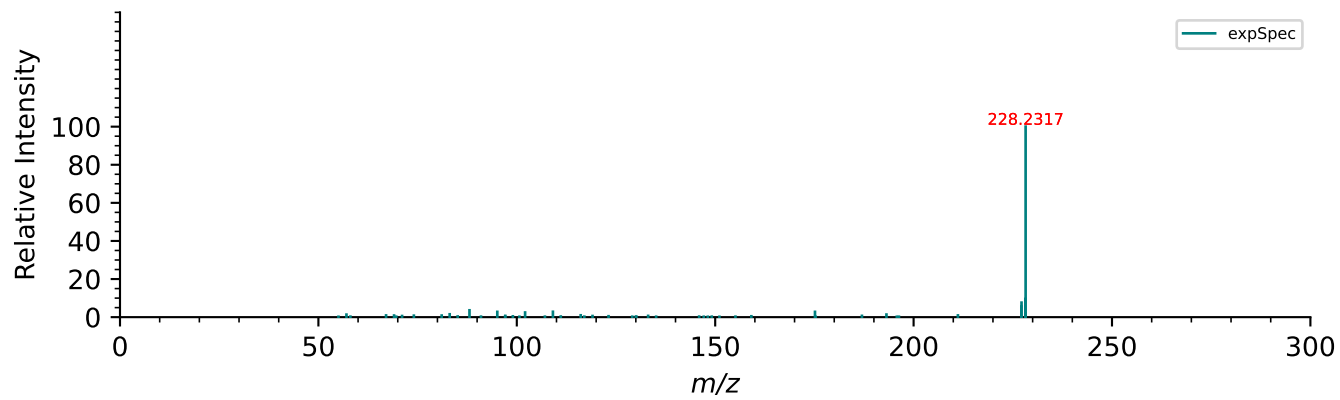

Supplement: identification_of_ingredients.zip [file compound00336.pdf › identification of ingredients/Data analysis/3.mass spectrometry/Original Ingredients/compound00336.pdf]

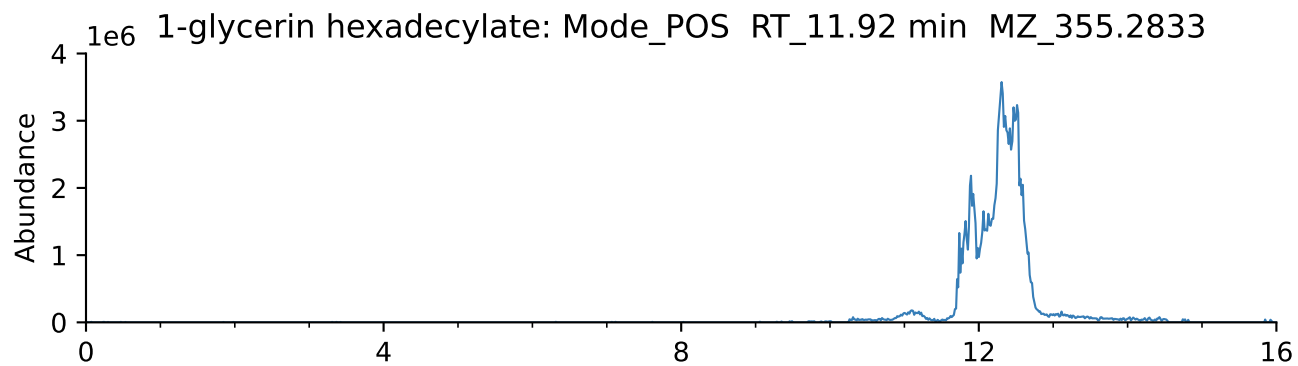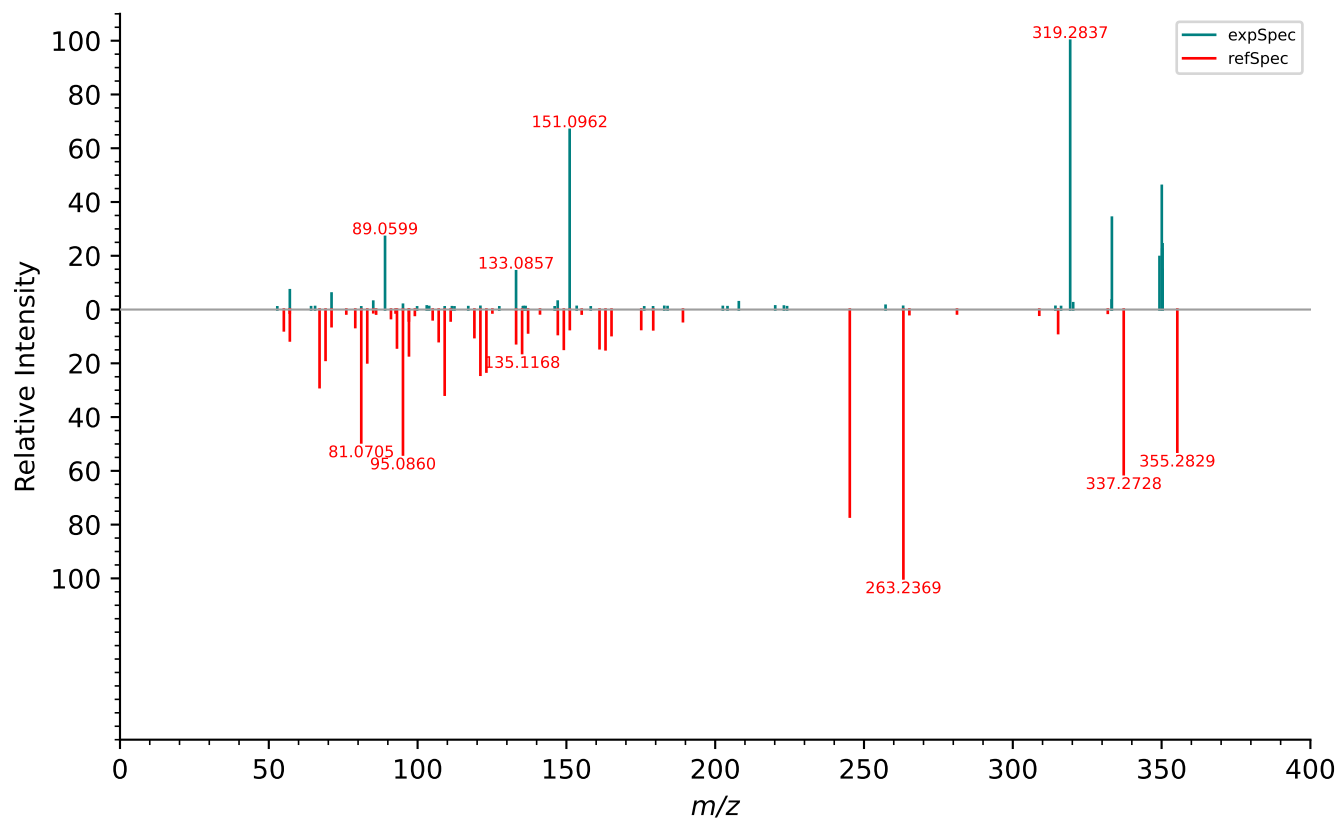

Supplement: identification_of_ingredients.zip [file compound00338.pdf › identification of ingredients/Data analysis/3.mass spectrometry/Original Ingredients/compound00338.pdf]

1-carboxy-2-(3,4-dihydroxyphenyl)ethy...: Mode\_NEG RT\_6.41 min MZ\_533.1085

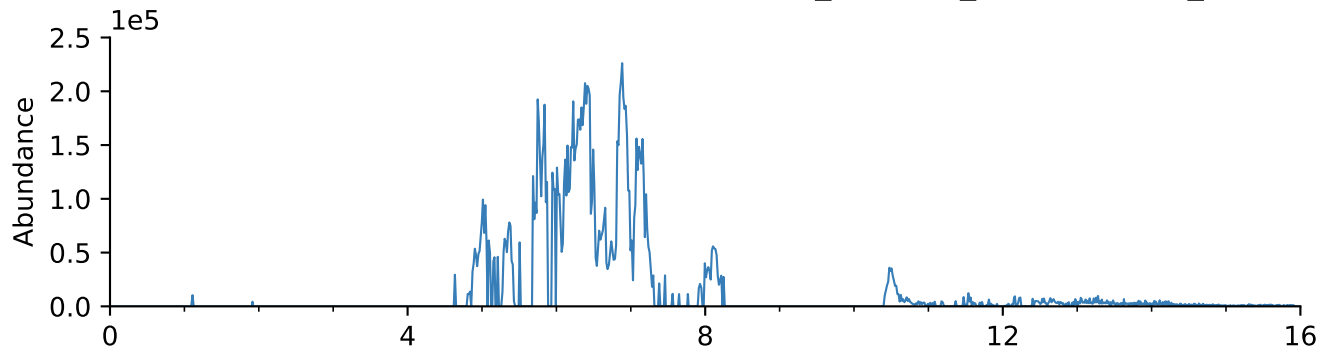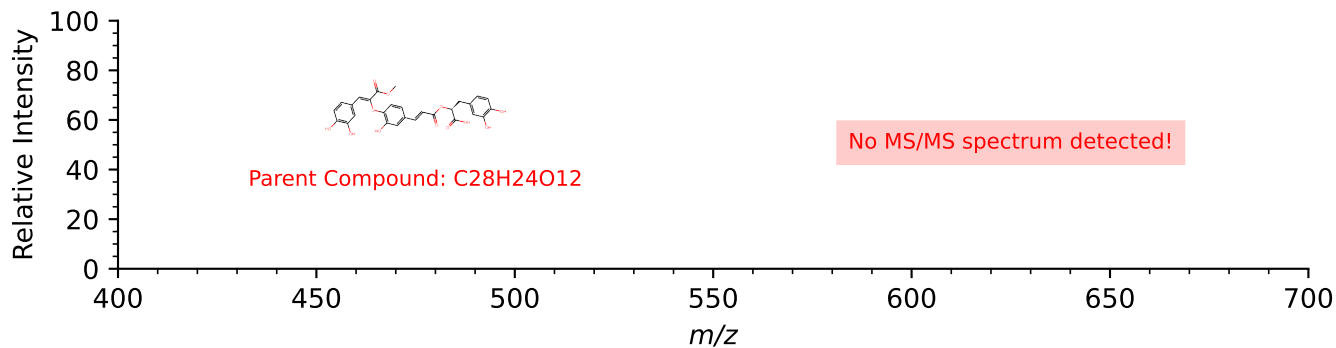

Supplement: identification_of_ingredients.zip [file compound00339.pdf › identification of ingredients/Data analysis/3.mass spectrometry/Original Ingredients/compound00339.pdf]

(2's)-7-hydroxy-5-hydroxymethyl-2-(2'...: Mode\_POS RT\_5.26 min MZ\_233.0810

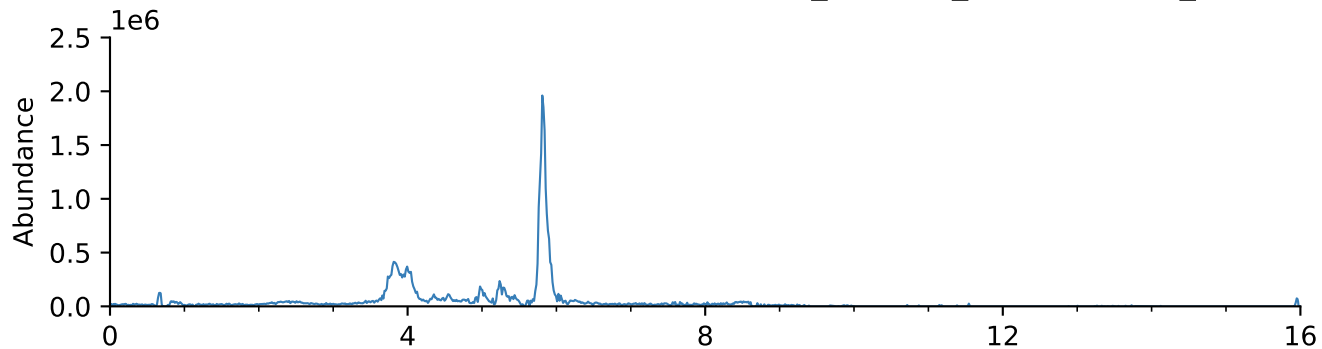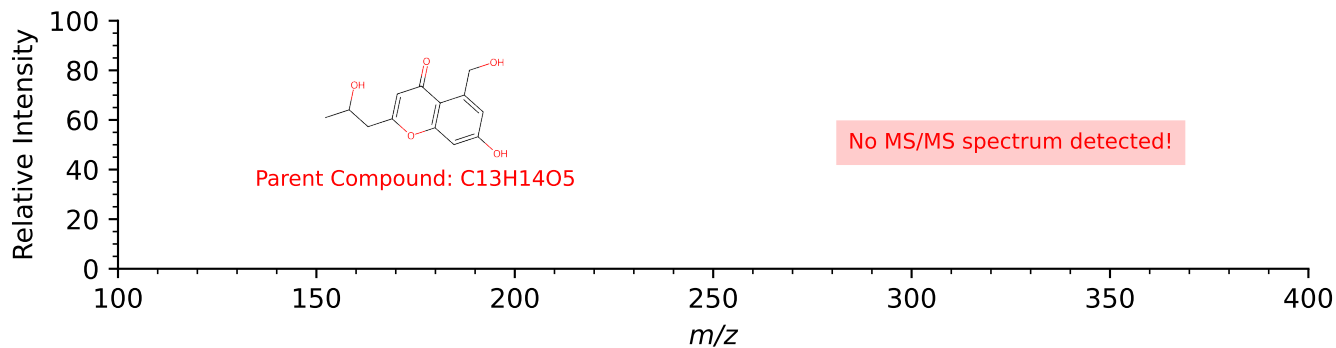

Supplement: identification_of_ingredients.zip [file compound00340.pdf › identification of ingredients/Data analysis/3.mass spectrometry/Original Ingredients/compound00340.pdf]

(2E)-2-(3,4-dihydroxybenzylidene)-6,7...: Mode\_NEG RT\_5.25 min MZ\_285.0396

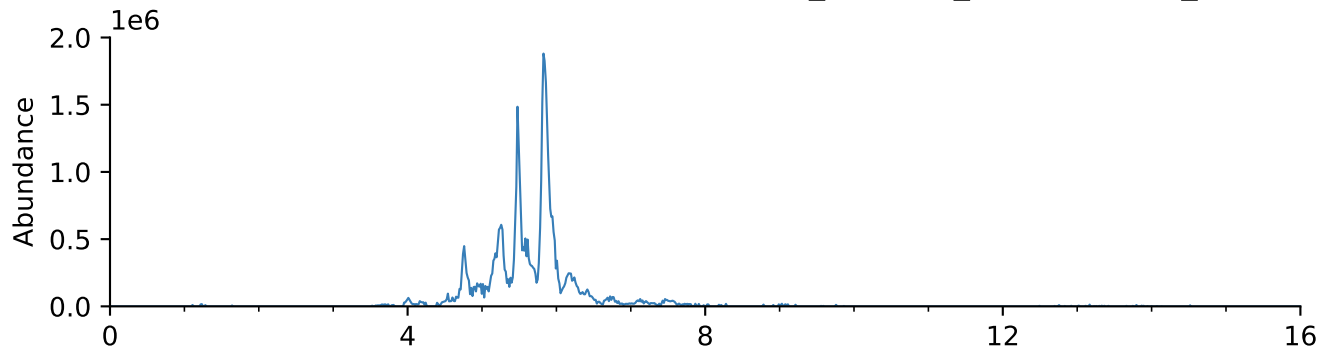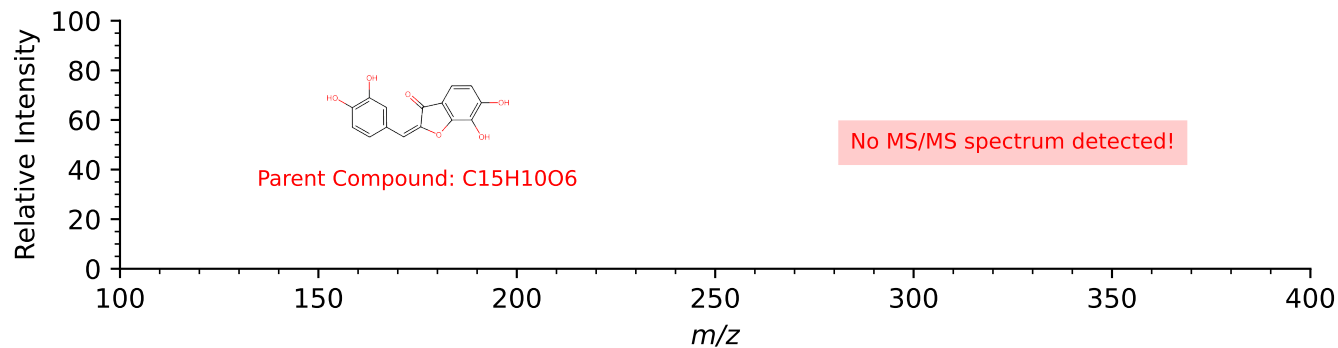

Supplement: identification_of_ingredients.zip [file compound00343.pdf › identification of ingredients/Data analysis/3.mass spectrometry/Original Ingredients/compound00343.pdf]

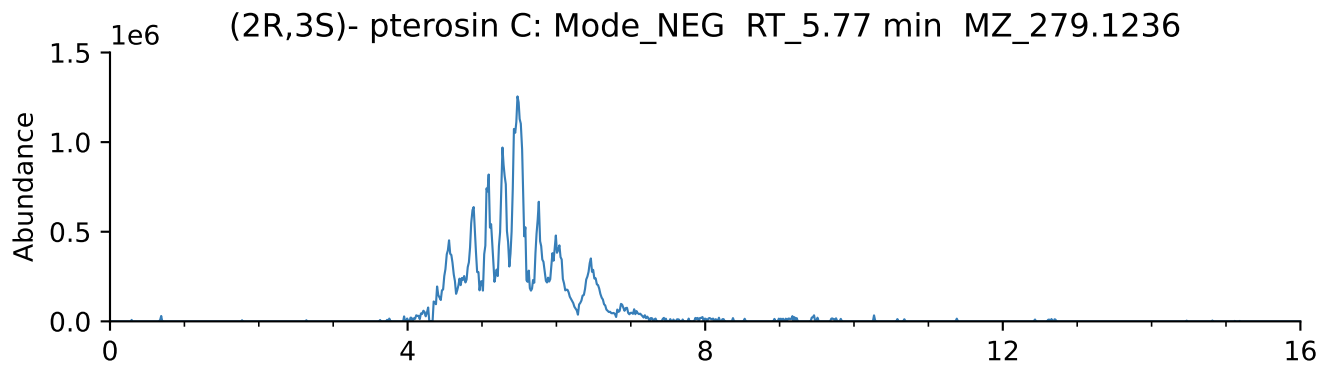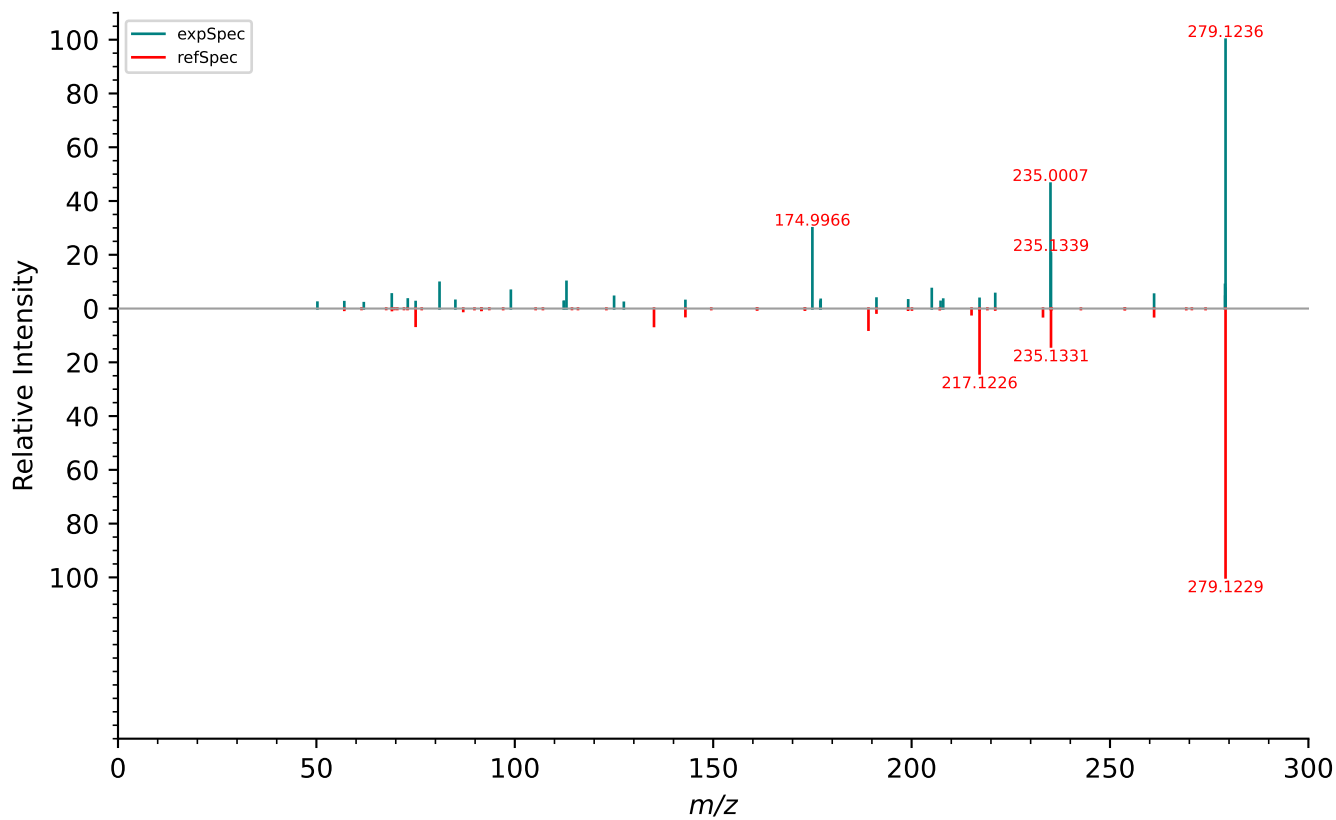

Supplement: identification_of_ingredients.zip [file compound00344.pdf › identification of ingredients/Data analysis/3.mass spectrometry/Original Ingredients/compound00344.pdf]

(3S)-3-acetyl-6-methylpyran-2,4-dione: Mode\_NEG RT\_4.36 min MZ\_167.0343

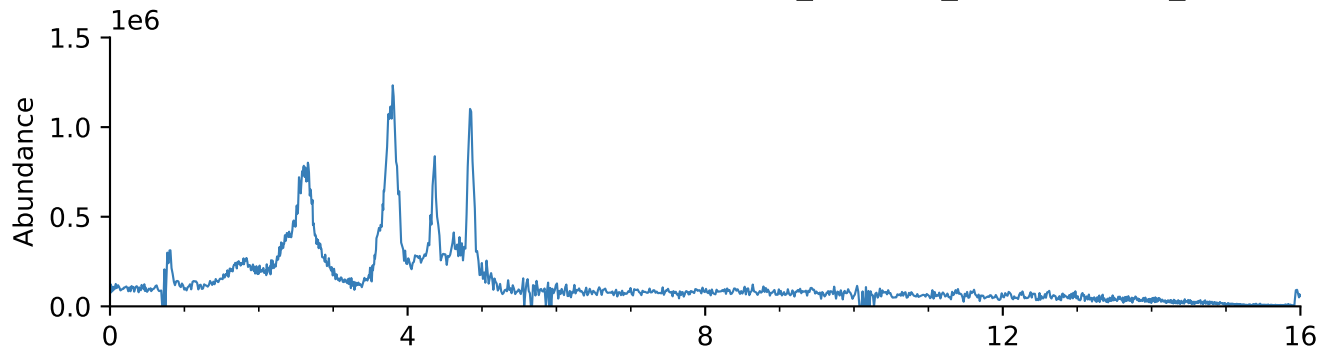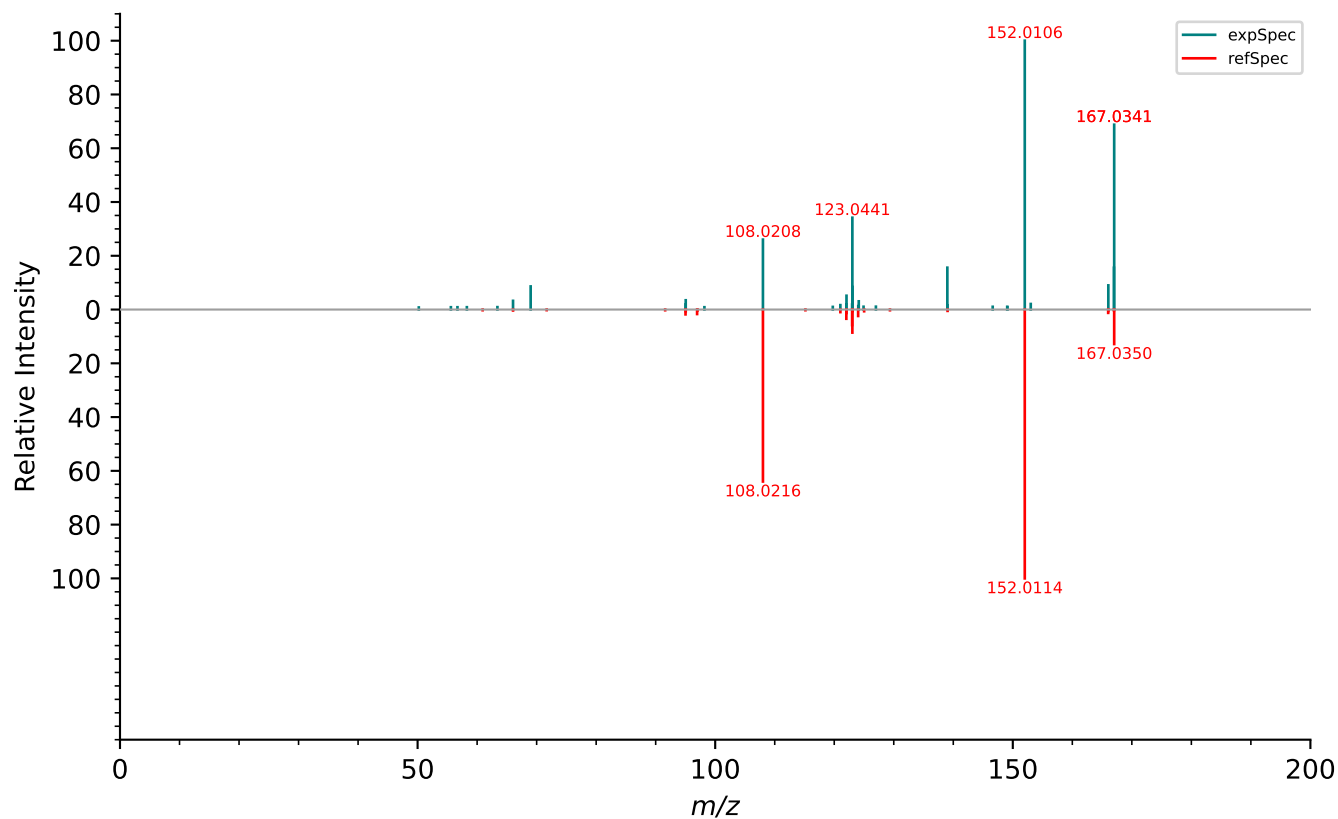

Supplement: identification_of_ingredients.zip [file compound00346.pdf › identification of ingredients/Data analysis/3.mass spectrometry/Original Ingredients/compound00346.pdf]

(R)-2,6-Dimethyl-5-heptenal: Mode\_NEG RT\_10.08 min MZ\_279.2323

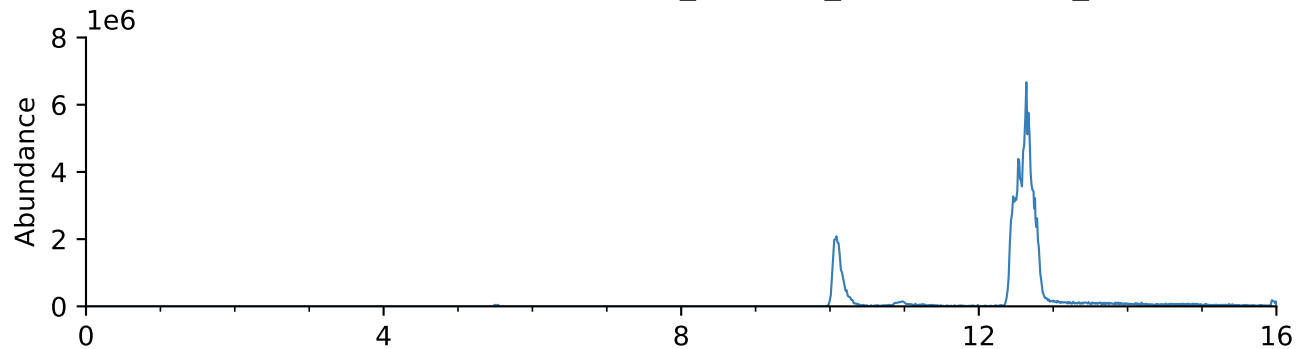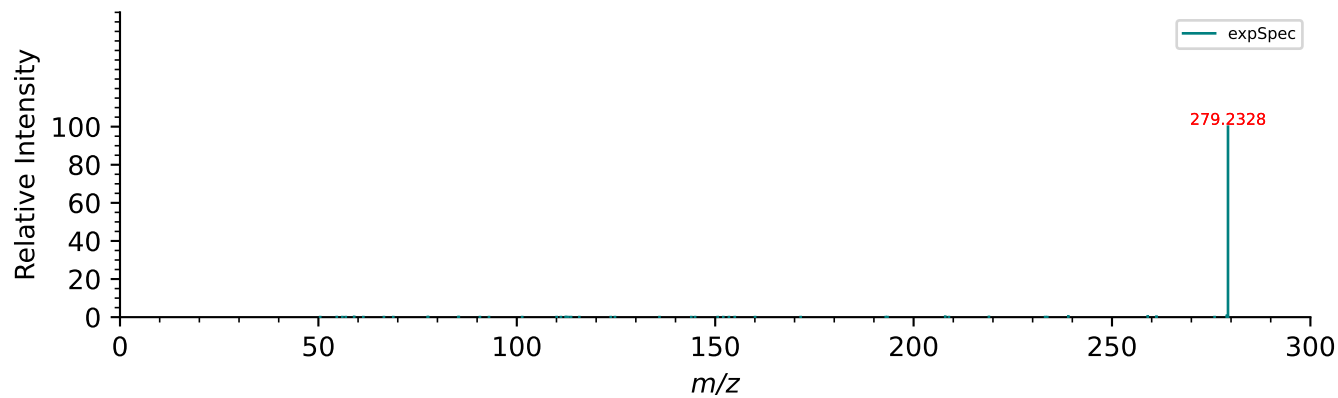

Supplement: identification_of_ingredients.zip [file compound00347.pdf › identification of ingredients/Data analysis/3.mass spectrometry/Original Ingredients/compound00347.pdf]

(z)-6,7-epoxy-6,7-dihydroiligustilide: Mode\_NEG RT\_7.97 min MZ\_251.0922

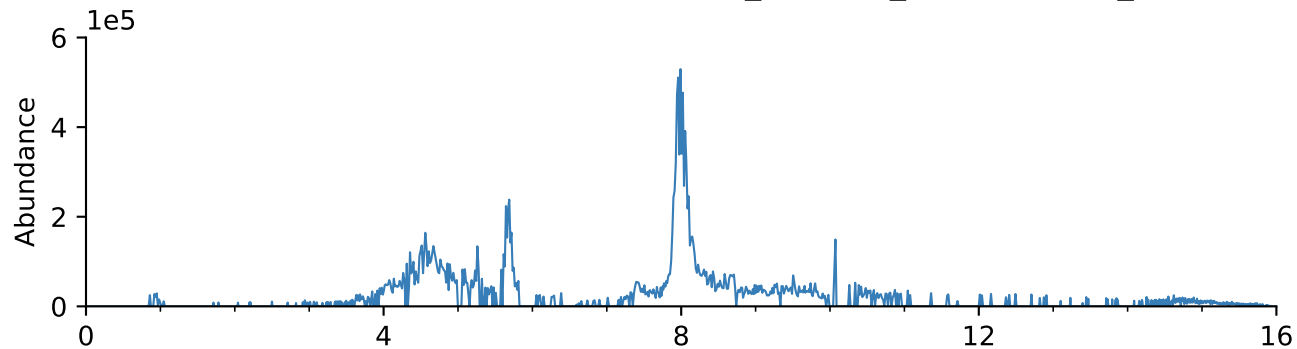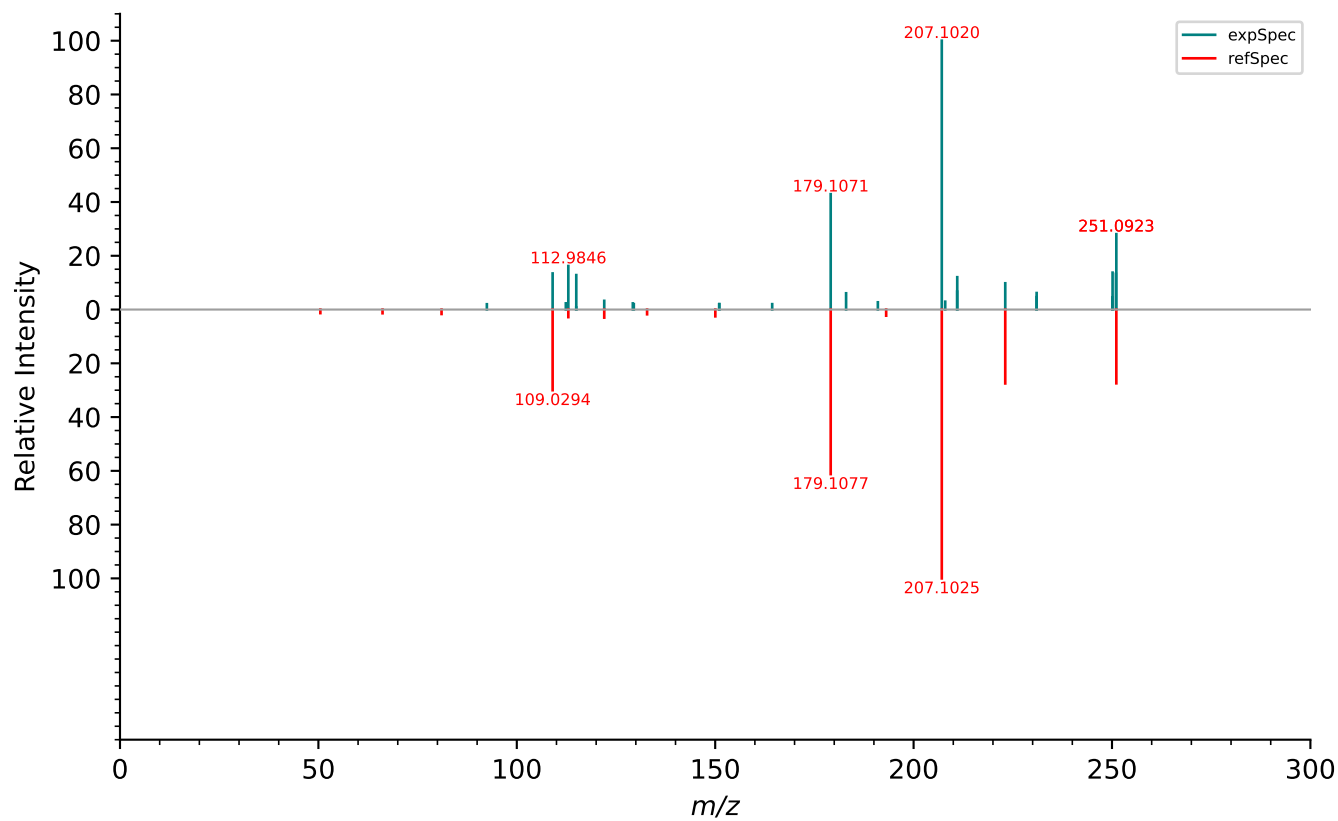

Supplement: identification_of_ingredients.zip [file compound00348.pdf › identification of ingredients/Data analysis/3.mass spectrometry/Original Ingredients/compound00348.pdf]

(Z)-isobutyl 2-methylbut-2-enoate: Mode\_NEG RT\_9.57 min MZ\_311.2229

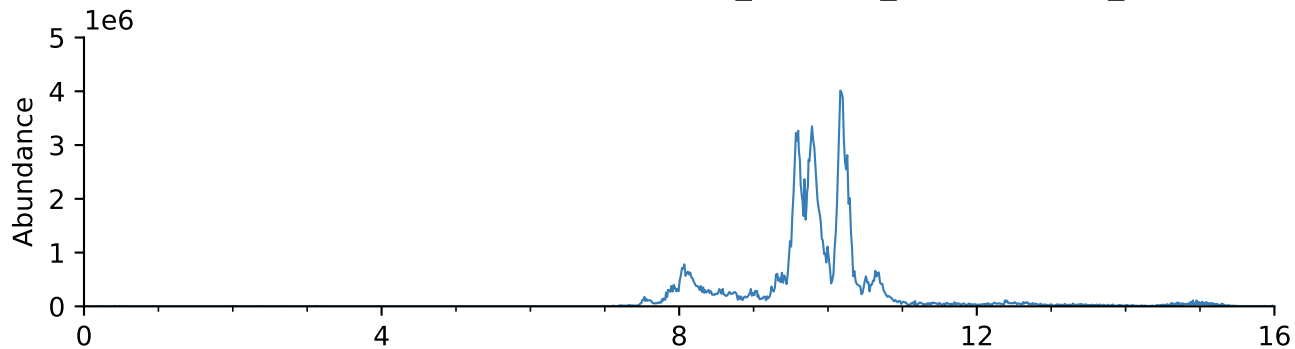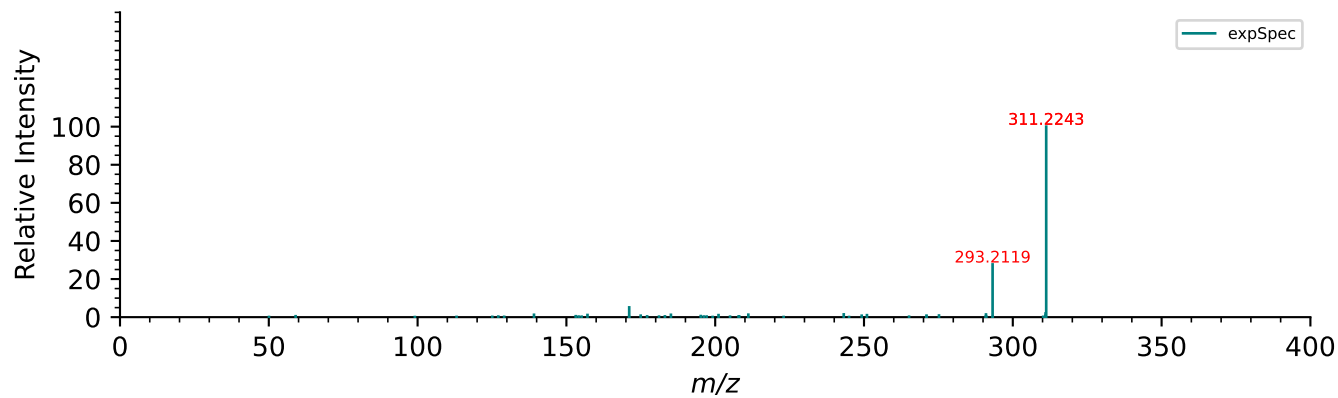

Supplement: identification_of_ingredients.zip [file compound00349.pdf › identification of ingredients/Data analysis/3.mass spectrometry/Original Ingredients/compound00349.pdf]

1,1,7,7a-tetramethyl-1a,2,4,6,7,7b-he...: Mode\_NEG RT\_9.88 min MZ\_263.1652

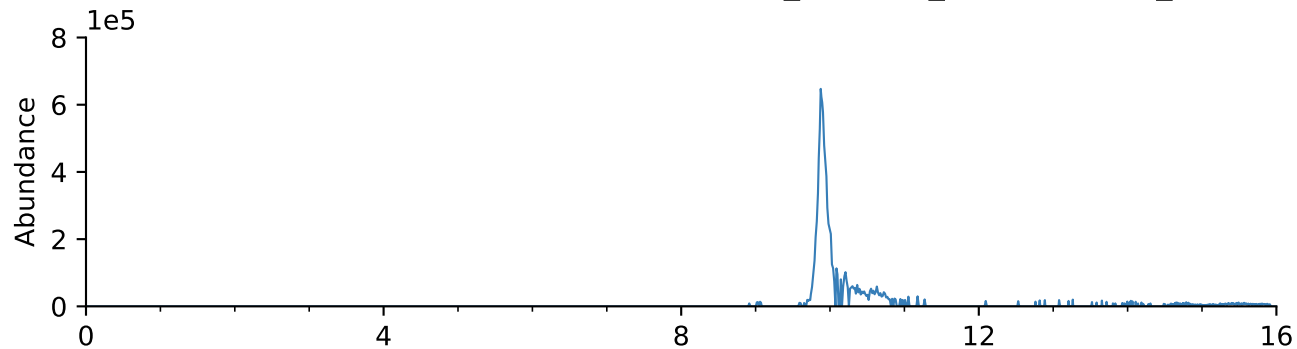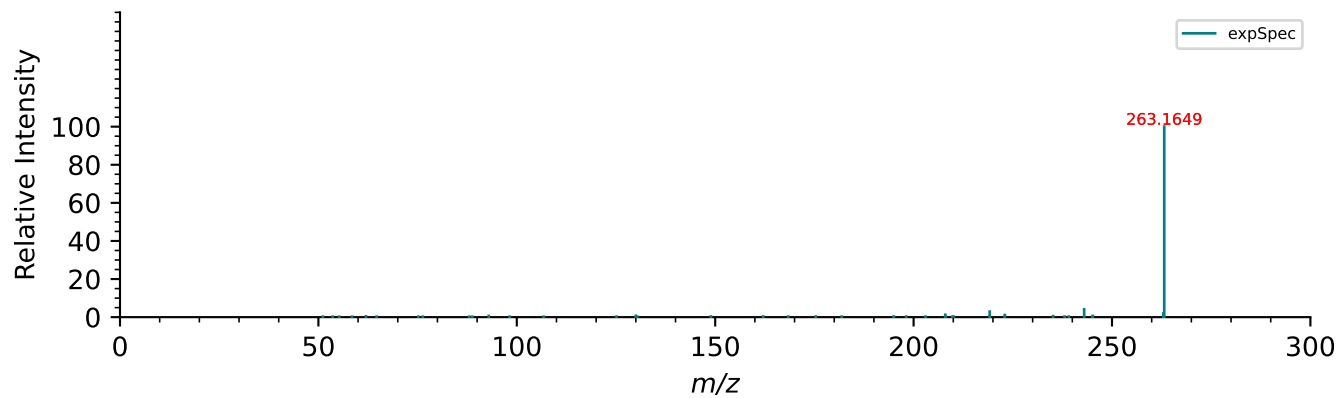

Supplement: identification_of_ingredients.zip [file compound00350.pdf › identification of ingredients/Data analysis/3.mass spectrometry/Original Ingredients/compound00350.pdf]

(3S,3aR,5S,6S,7aR)-5,6-dihydroxy-3,6-...: Mode\_NEG RT\_5.68 min MZ\_199.0969

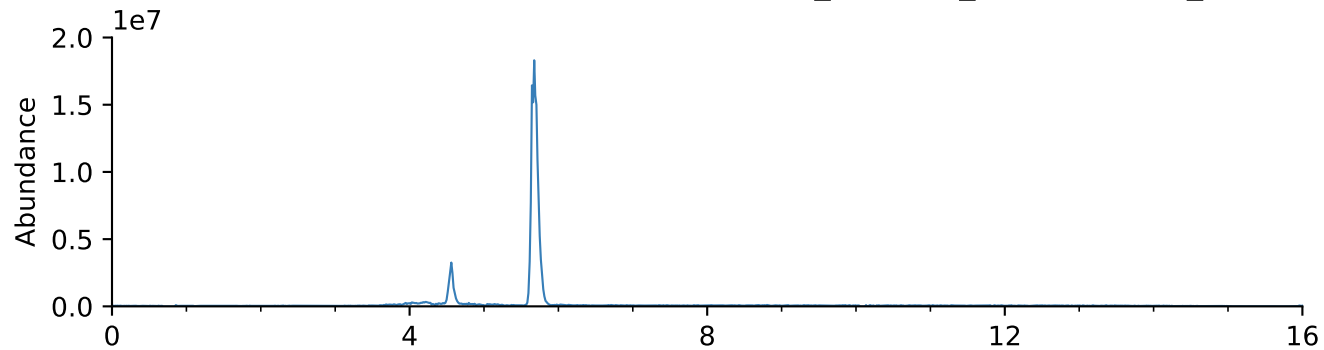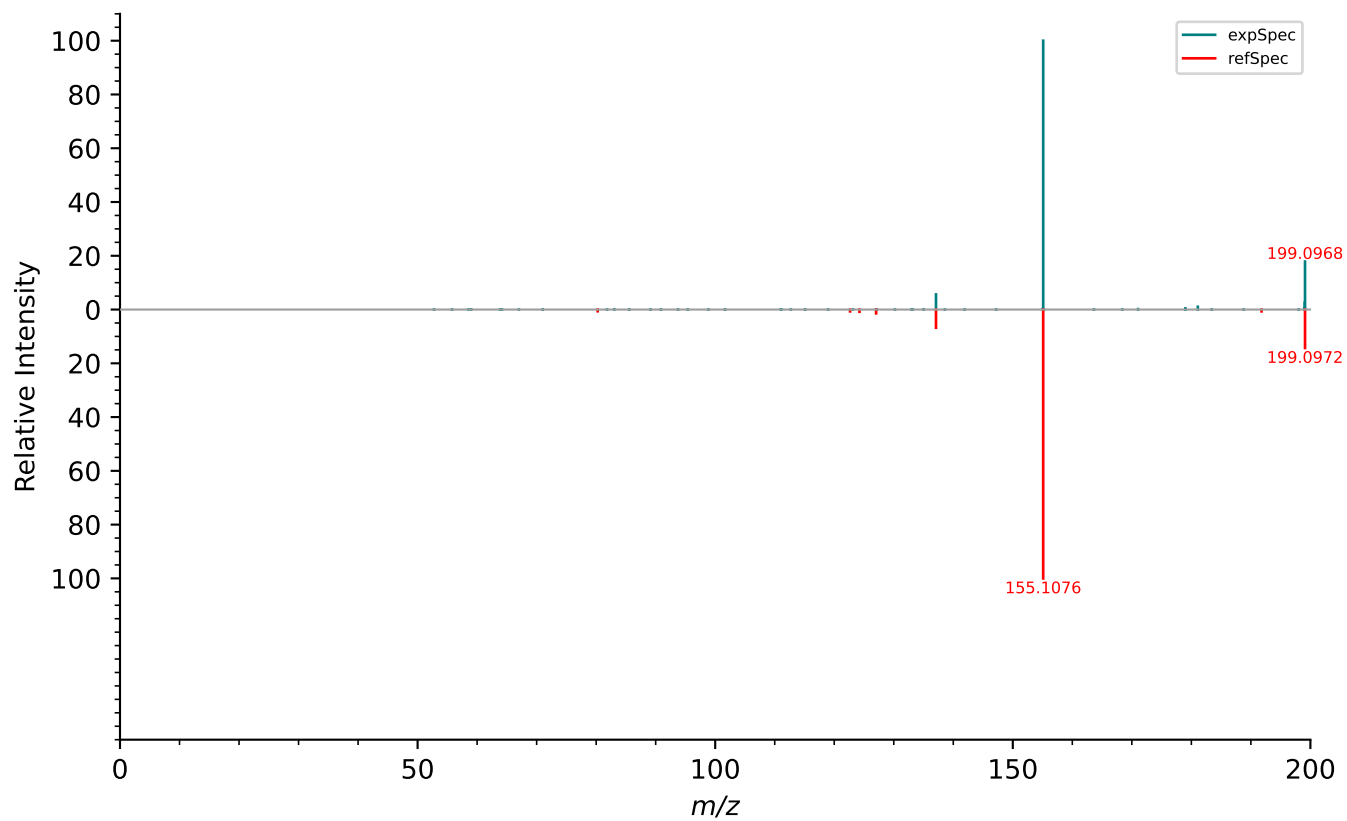

Supplement: identification_of_ingredients.zip [file compound00352.pdf › identification of ingredients/Data analysis/3.mass spectrometry/Original Ingredients/compound00352.pdf]

andrographolide-19- $\beta$ -D-glucoside: Mode\_NEG RT\_5.42 min MZ\_493.2445

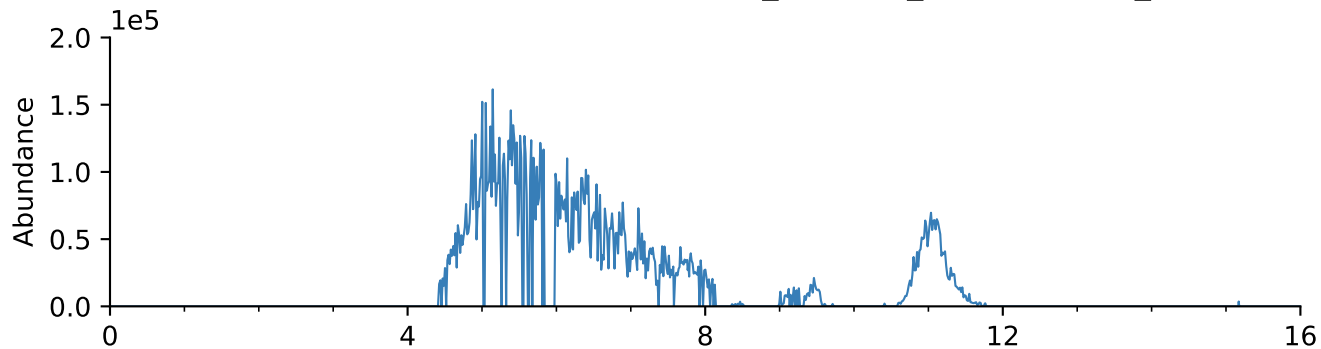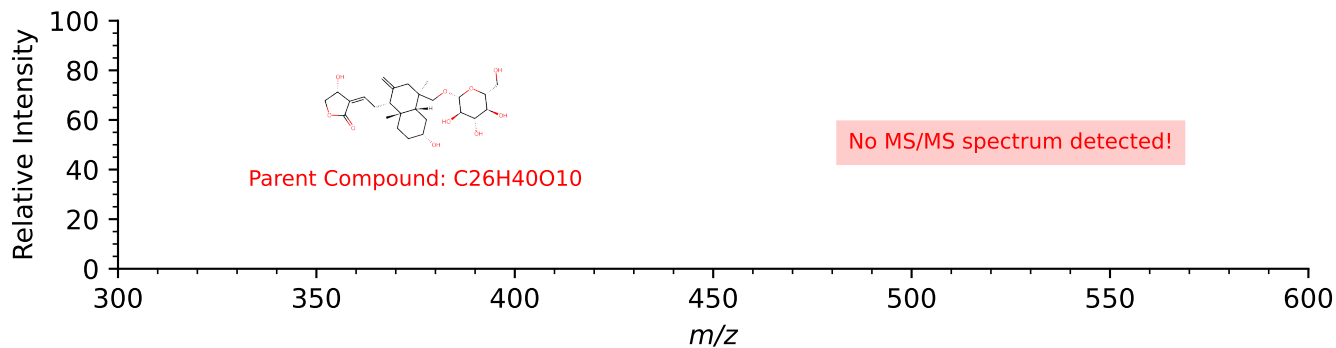

Supplement: identification_of_ingredients.zip [file compound00353.pdf › identification of ingredients/Data analysis/3.mass spectrometry/Original Ingredients/compound00353.pdf]

3,3-Diethyl-4,5-dimethyl-4-hexen-2-one: Mode\_NEG RT\_10.60 min MZ\_227.1649

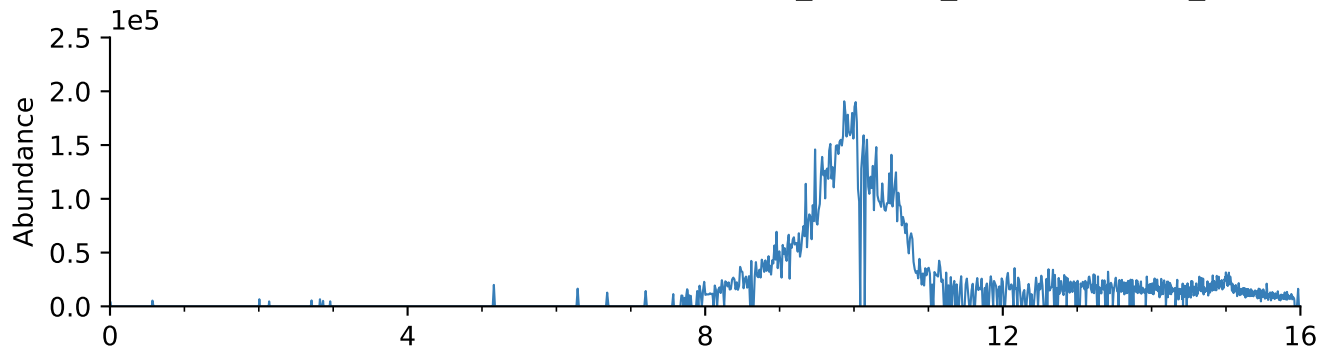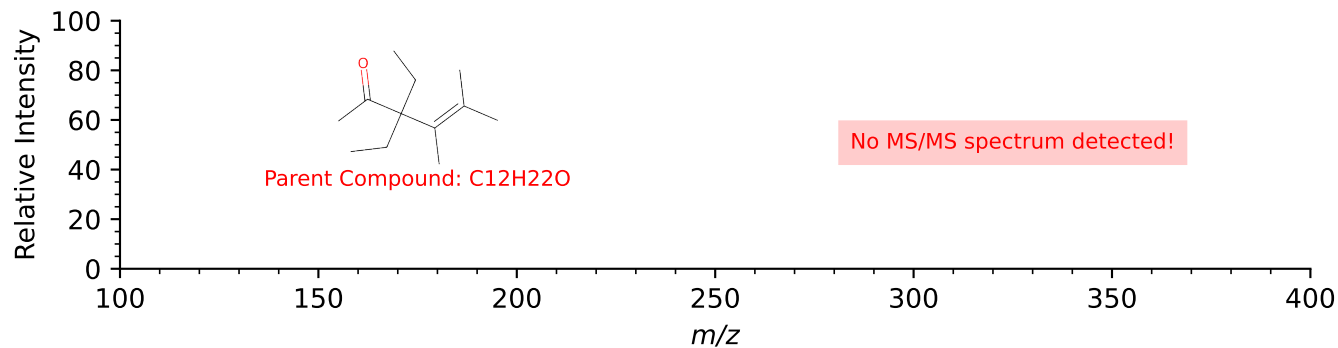

Supplement: identification_of_ingredients.zip [file compound00356.pdf › identification of ingredients/Data analysis/3.mass spectrometry/Original Ingredients/compound00356.pdf]

3,7-Dimethylocta-2,6-dienoate: Mode\_POS RT\_6.27 min MZ\_191.1040

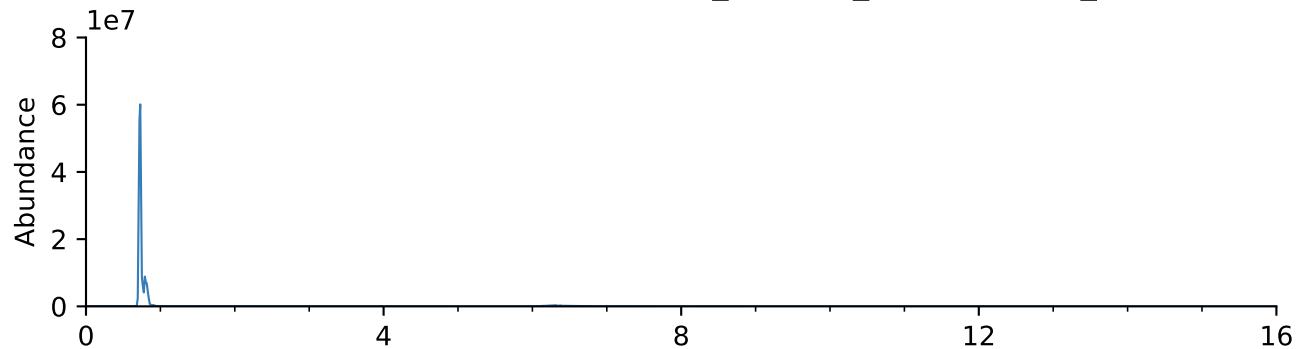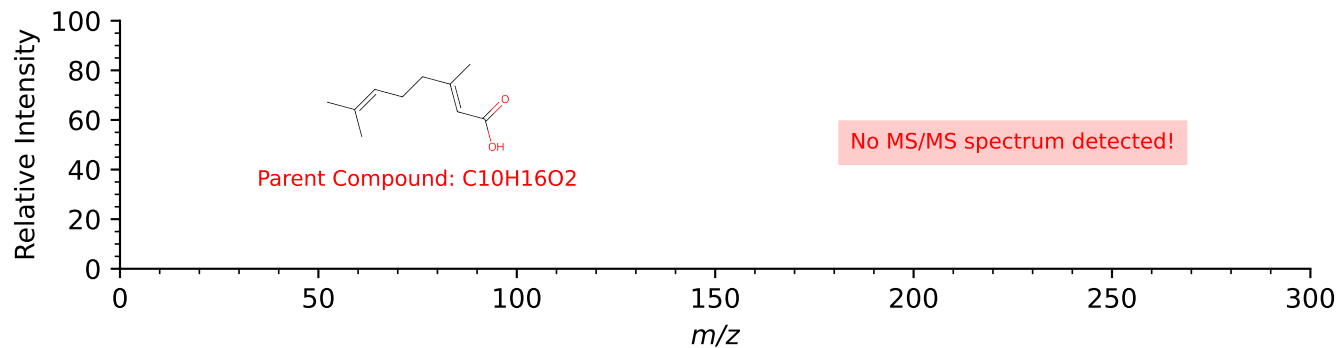

Supplement: identification_of_ingredients.zip [file compound00359.pdf › identification of ingredients/Data analysis/3.mass spectrometry/Original Ingredients/compound00359.pdf]

3-(4-hydroxybenzyl)-3,4,7-chromantriol: Mode\_NEG RT\_5.34 min MZ\_269.0817

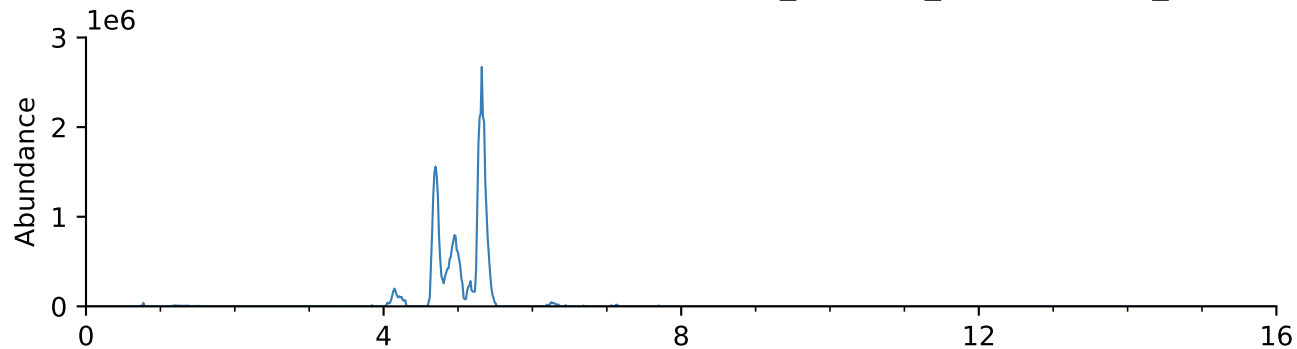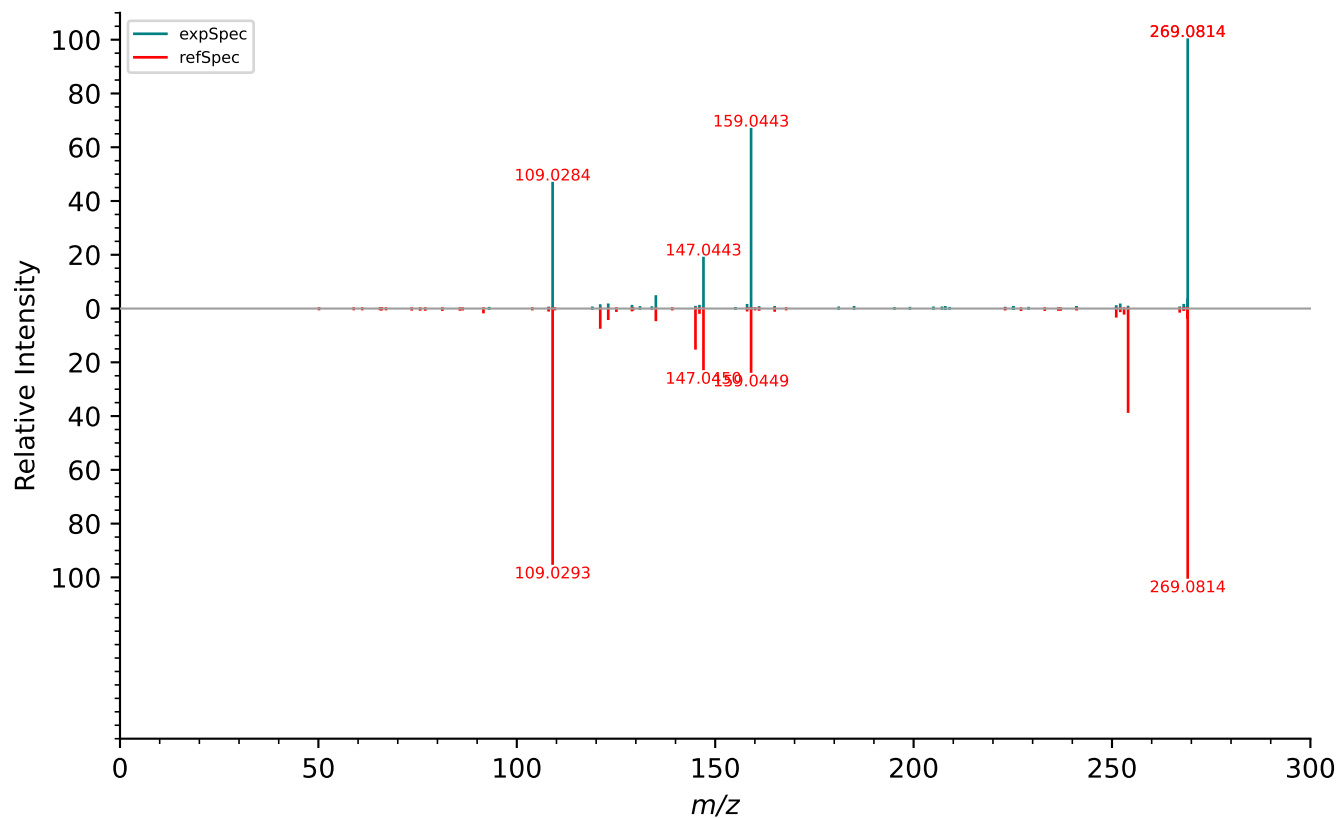

Supplement: identification_of_ingredients.zip [file compound00360.pdf › identification of ingredients/Data analysis/3.mass spectrometry/Original Ingredients/compound00360.pdf]

3-hydroxydehydroiso-alpha-lapachone: Mode\_NEG RT\_6.76 min MZ\_301.0717

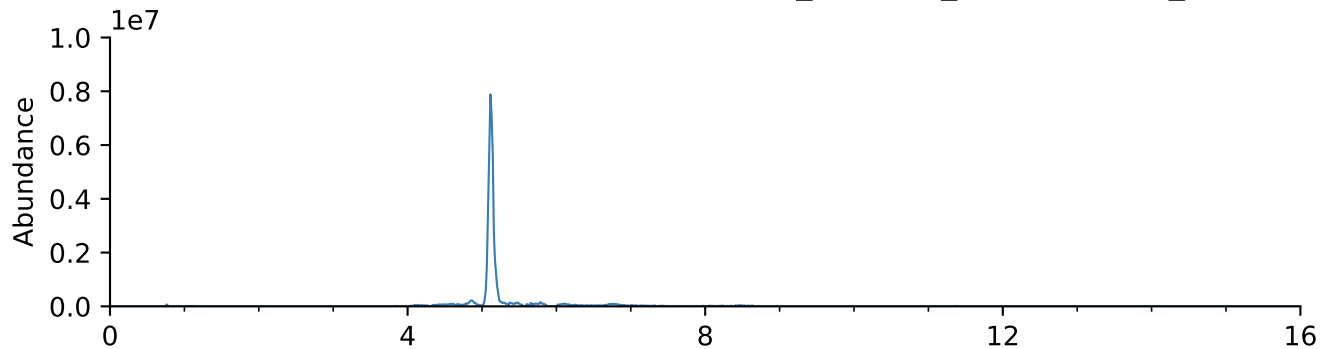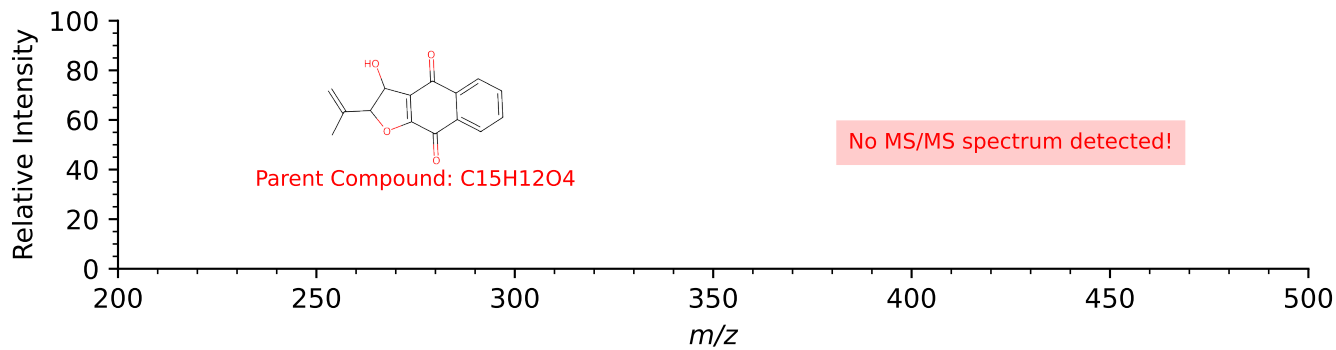

Supplement: identification_of_ingredients.zip [file compound00362.pdf › identification of ingredients/Data analysis/3.mass spectrometry/Original Ingredients/compound00362.pdf]

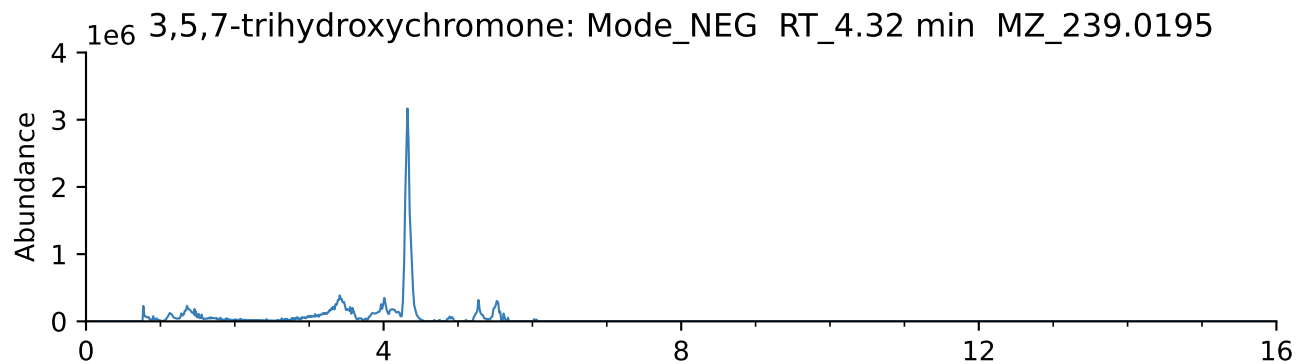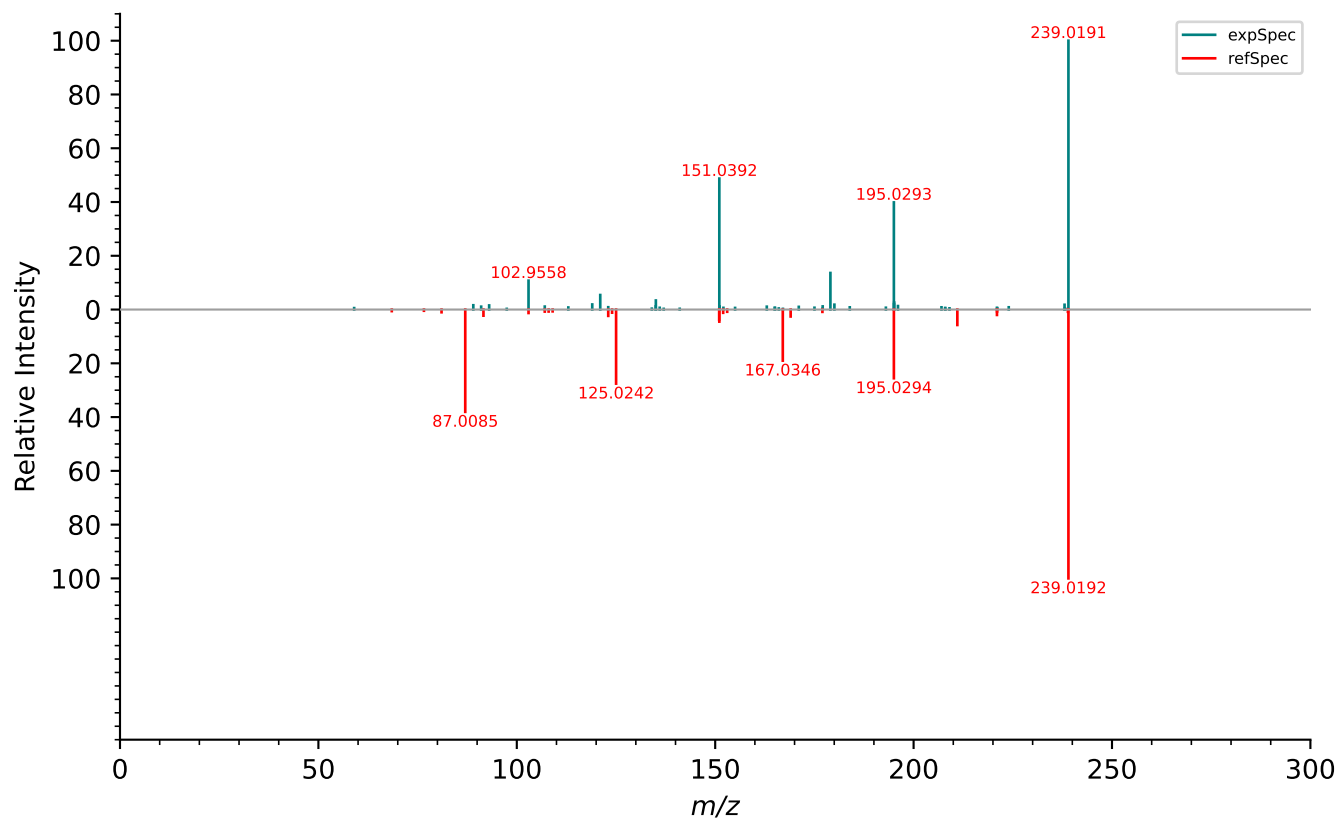

Supplement: identification_of_ingredients.zip [file compound00364.pdf › identification of ingredients/Data analysis/3.mass spectrometry/Original Ingredients/compound00364.pdf]

2 $\alpha$ ,3 $\alpha$ ,19 $\alpha$ -trihydroxy-24-norurs-4(23),...: Mode\_NEG RT\_9.74 min MZ\_517.3170

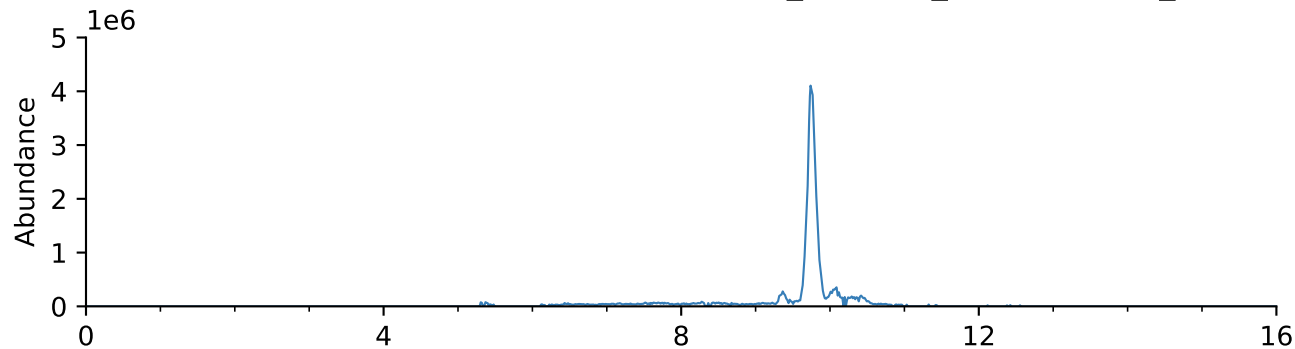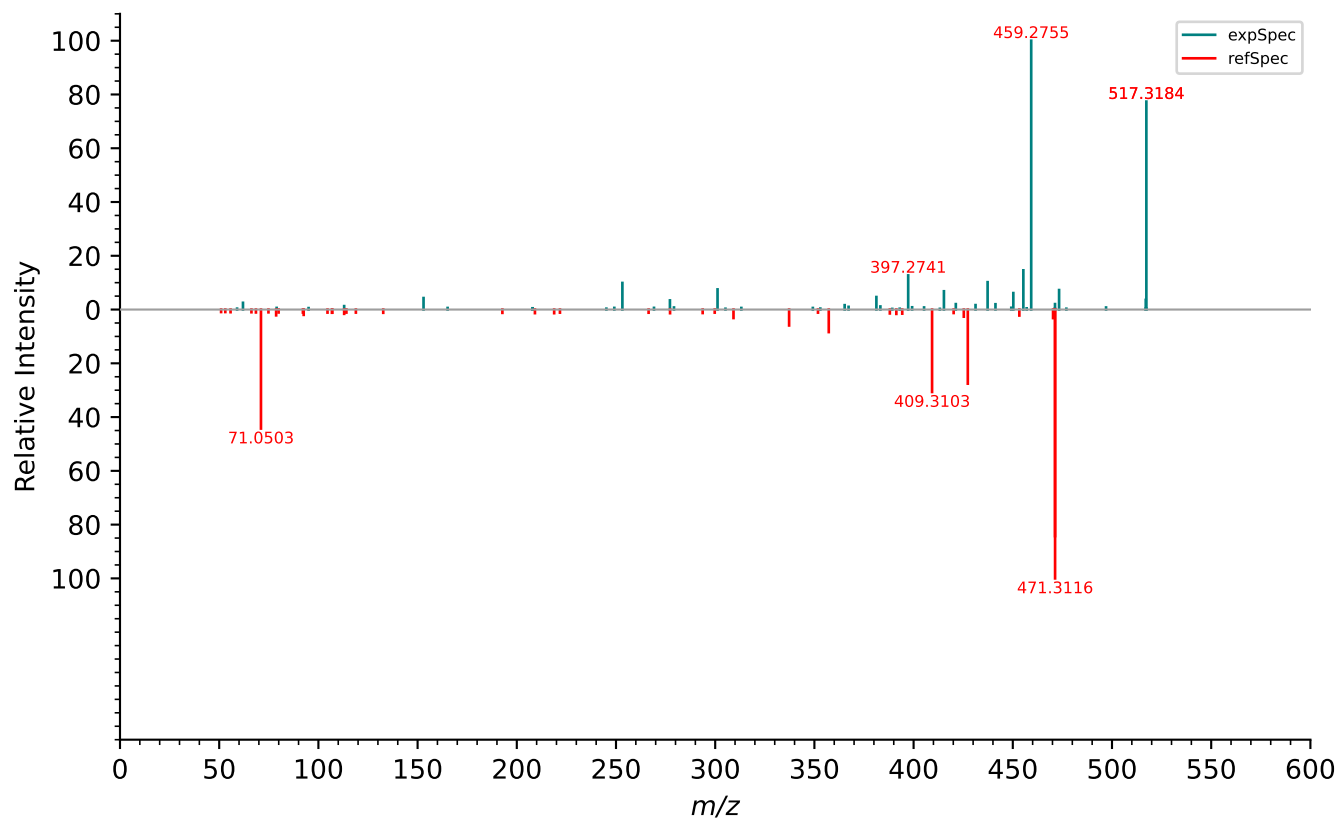

Supplement: identification_of_ingredients.zip [file compound00365.pdf › identification of ingredients/Data analysis/3.mass spectrometry/Original Ingredients/compound00365.pdf]

2-[(1R)-4-methyl-1-cyclohex-3-enyl]pr...: Mode\_NEG RT\_9.45 min MZ\_239.1286

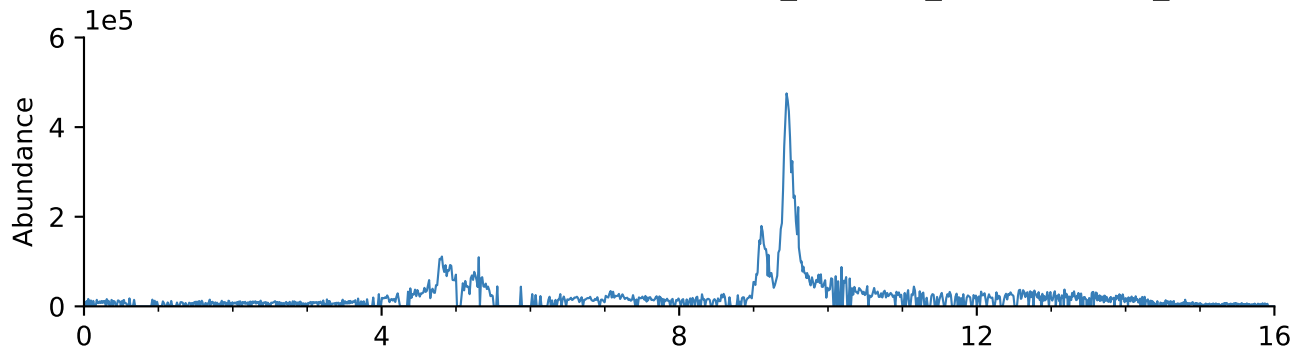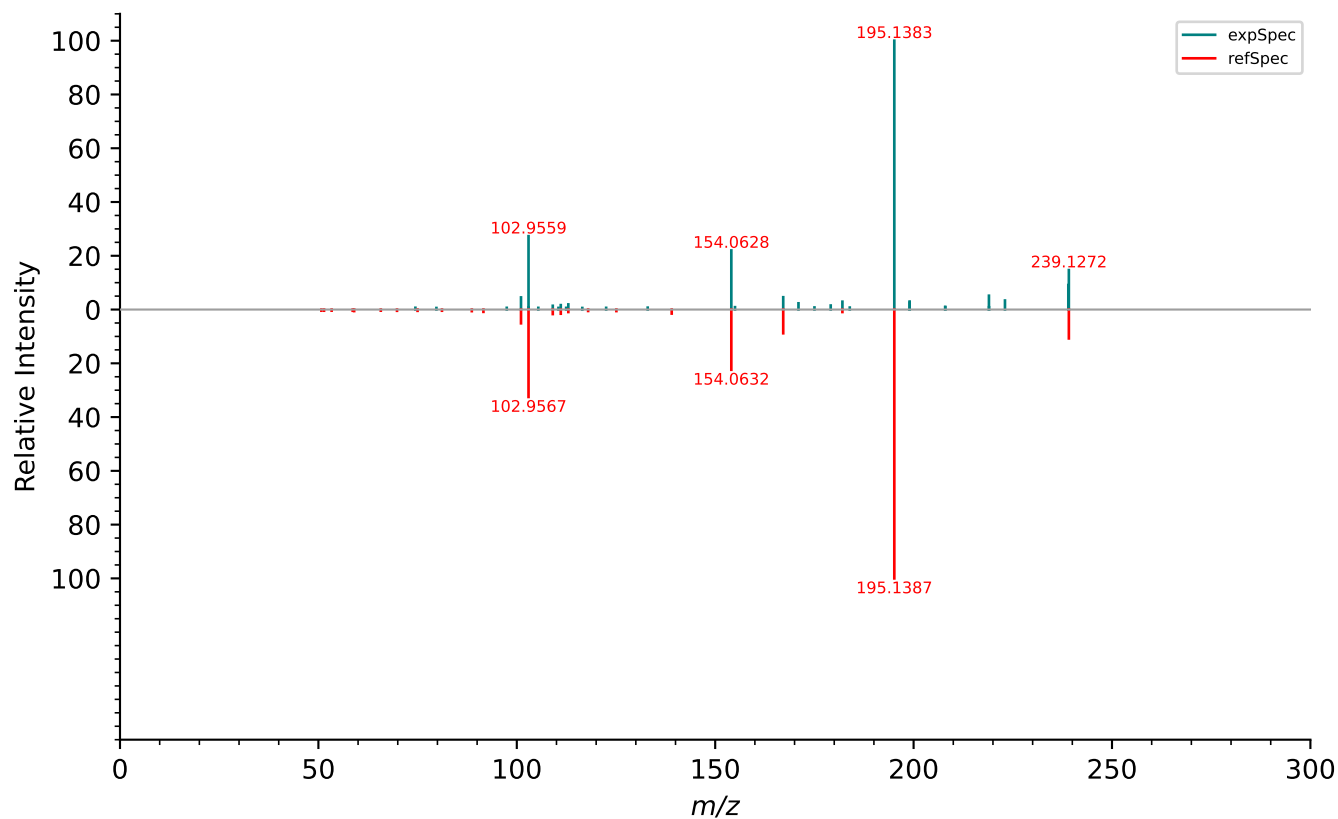

Supplement: identification_of_ingredients.zip [file compound00367.pdf › identification of ingredients/Data analysis/3.mass spectrometry/Original Ingredients/compound00367.pdf]

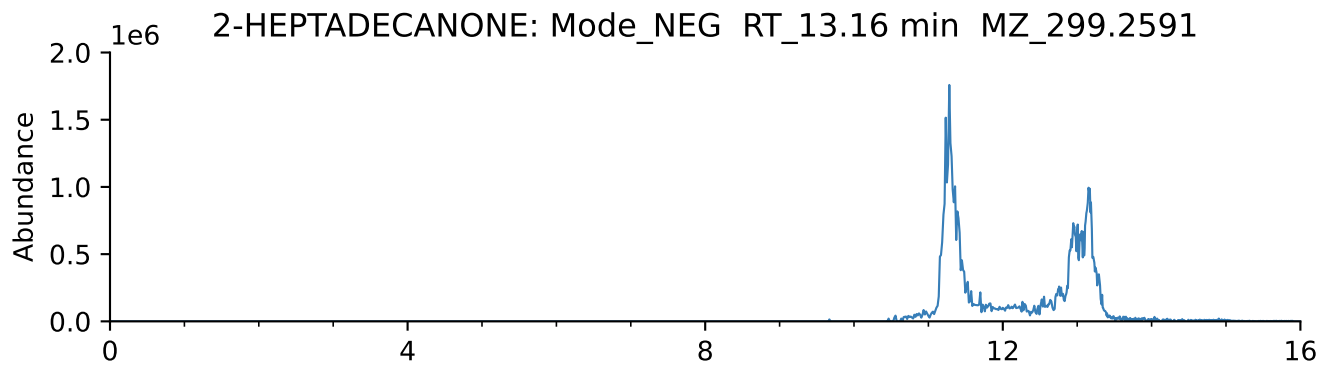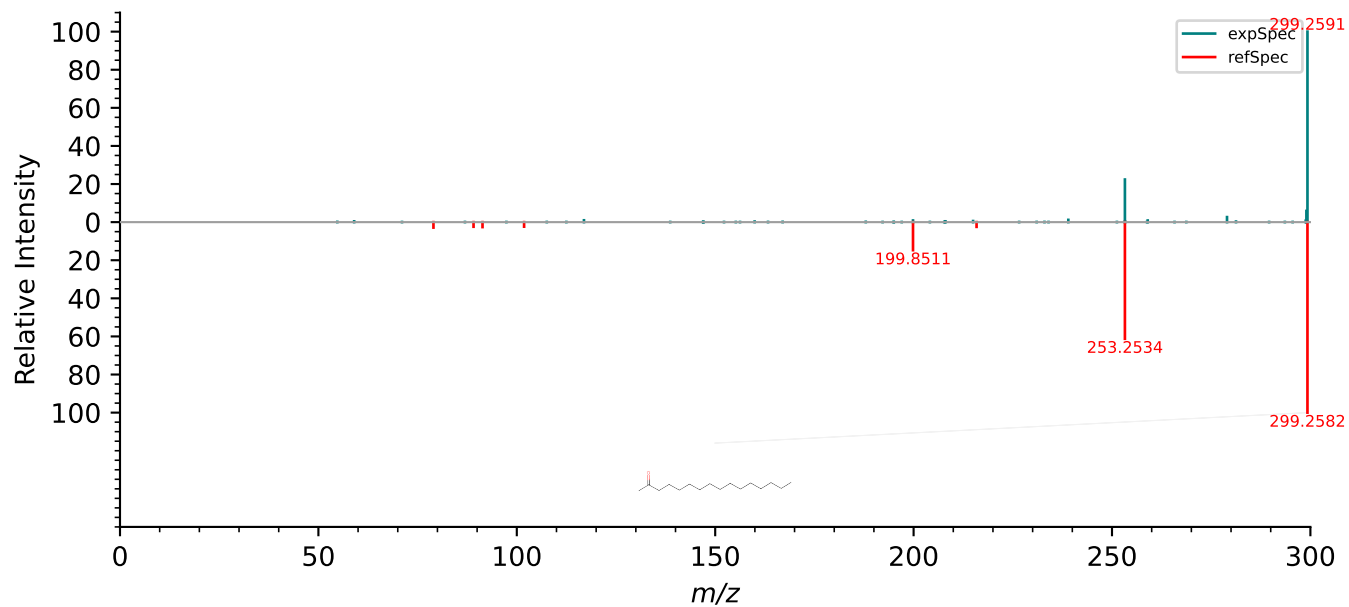

Supplement: identification_of_ingredients.zip [file compound00368.pdf › identification of ingredients/Data analysis/3.mass spectrometry/Original Ingredients/compound00368.pdf]

2-Hydroxy-5-(1-carboxyvinloxy)benzoi...: Mode\_NEG RT\_4.46 min MZ\_205.0138

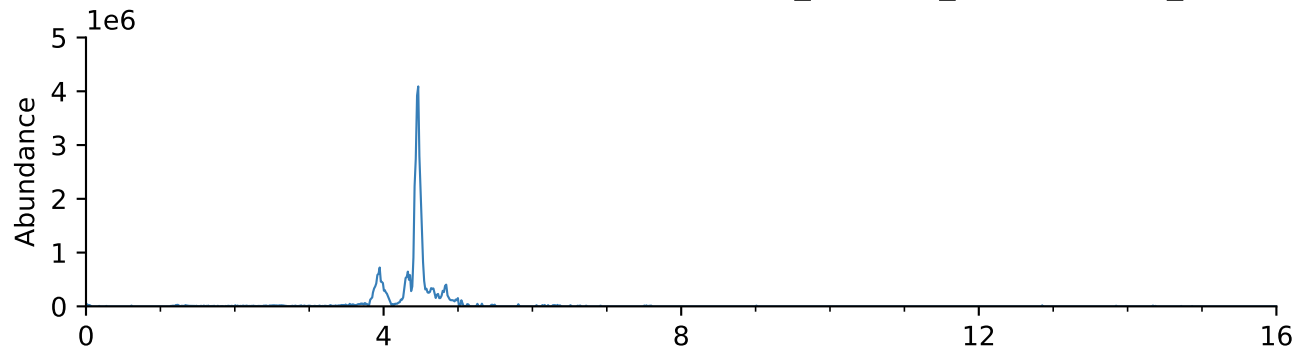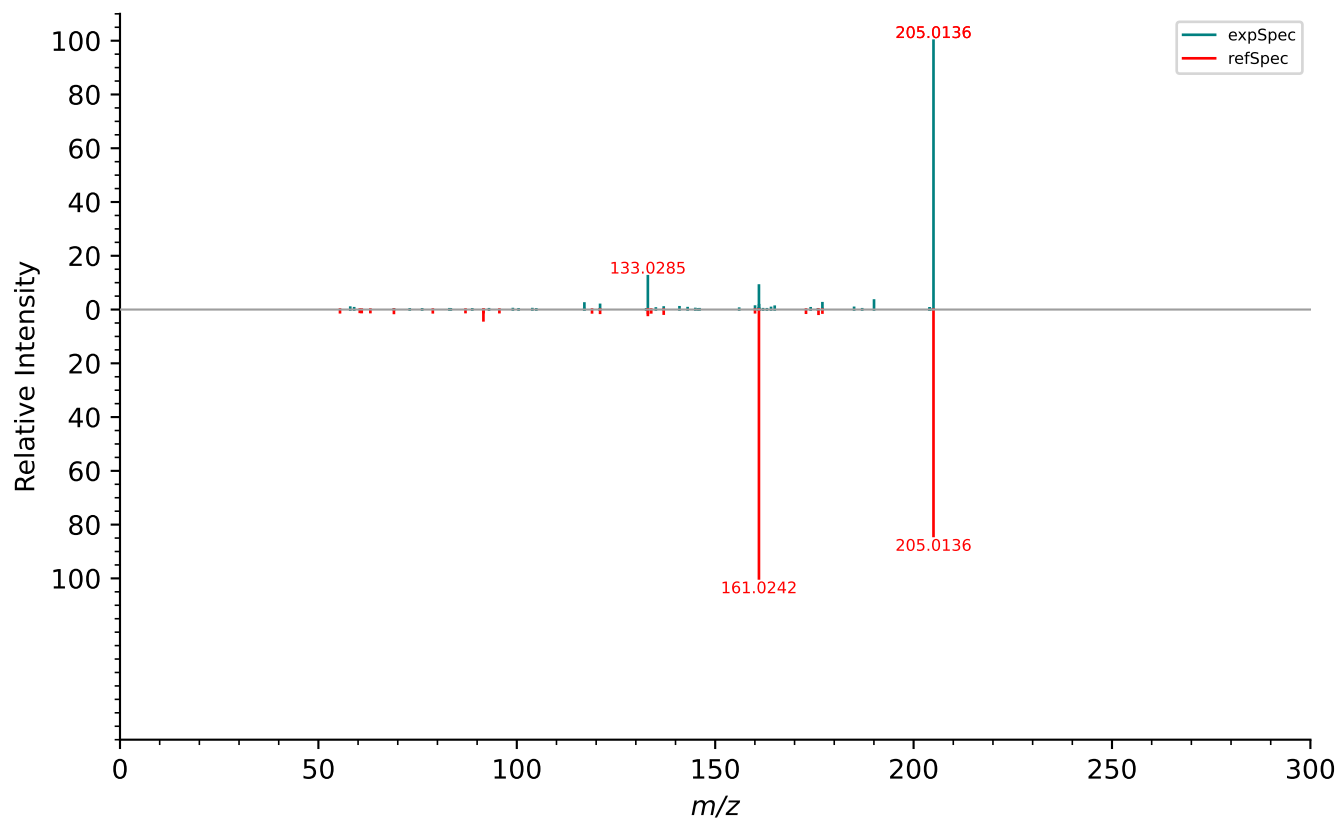

Supplement: identification_of_ingredients.zip [file compound00369.pdf › identification of ingredients/Data analysis/3.mass spectrometry/Original Ingredients/compound00369.pdf]

2alpha,5alpha,9alpha-trihydroxy-10bet...: Mode\_NEG RT\_7.23 min MZ\_451.2340

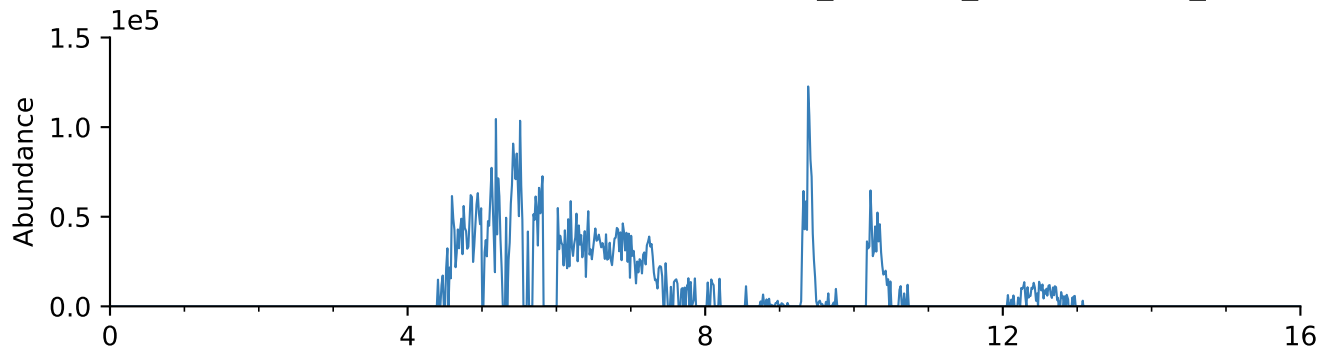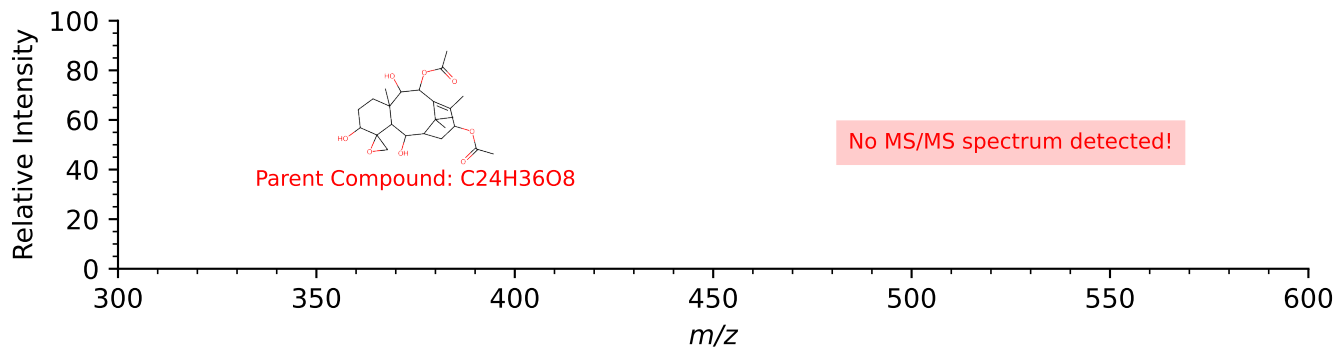

Supplement: identification_of_ingredients.zip [file compound00370.pdf › identification of ingredients/Data analysis/3.mass spectrometry/Original Ingredients/compound00370.pdf]

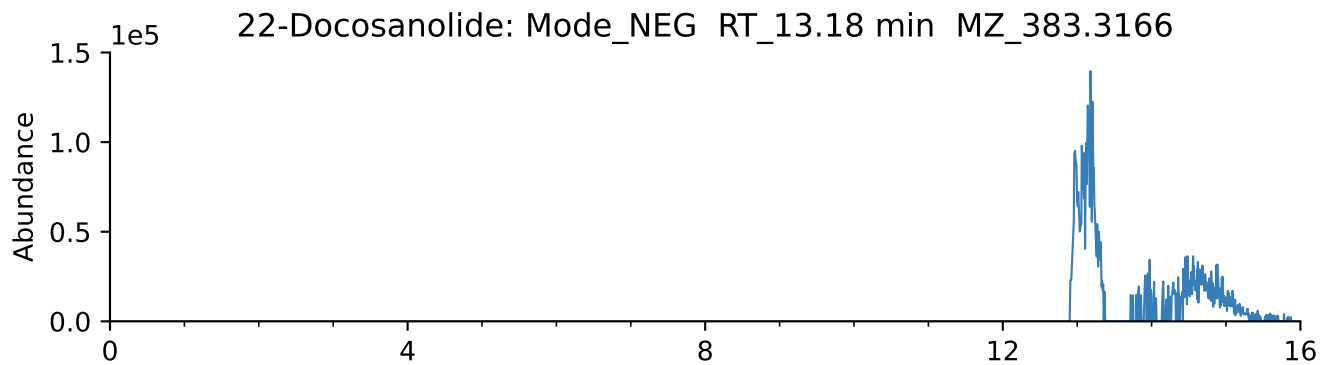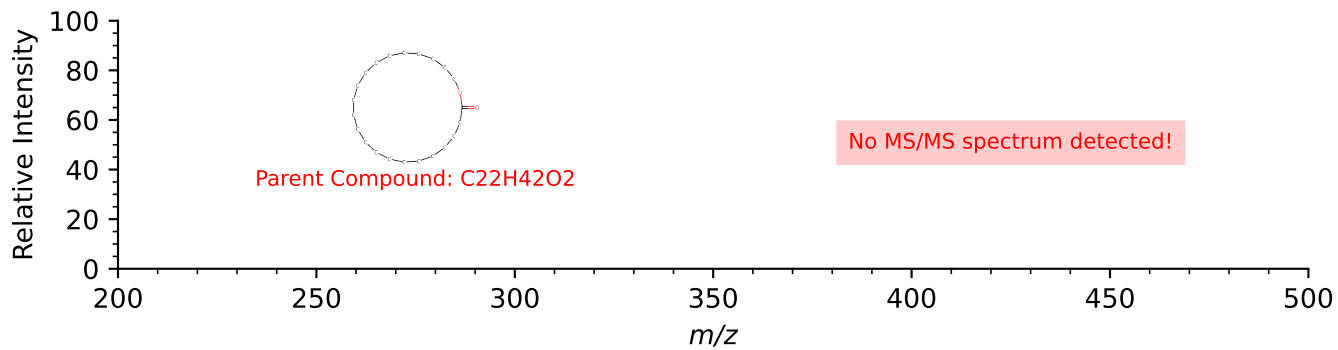

Supplement: identification_of_ingredients.zip [file compound00374.pdf › identification of ingredients/Data analysis/3.mass spectrometry/Original Ingredients/compound00374.pdf]

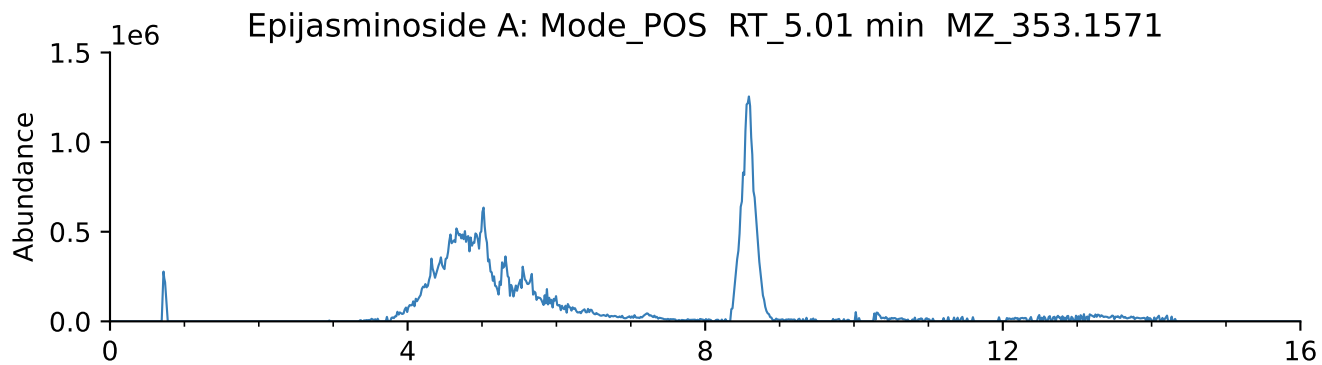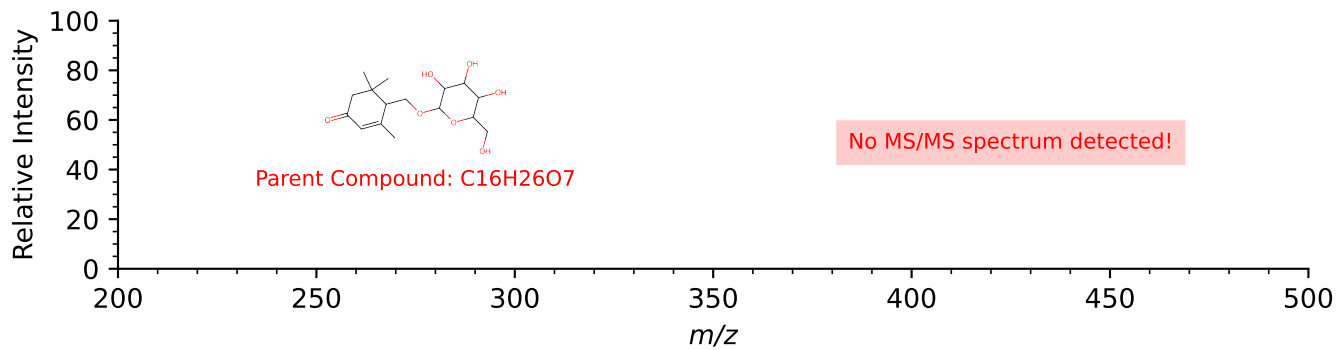

Supplement: identification_of_ingredients.zip [file compound00382.pdf › identification of ingredients/Data analysis/3.mass spectrometry/Original Ingredients/compound00382.pdf]

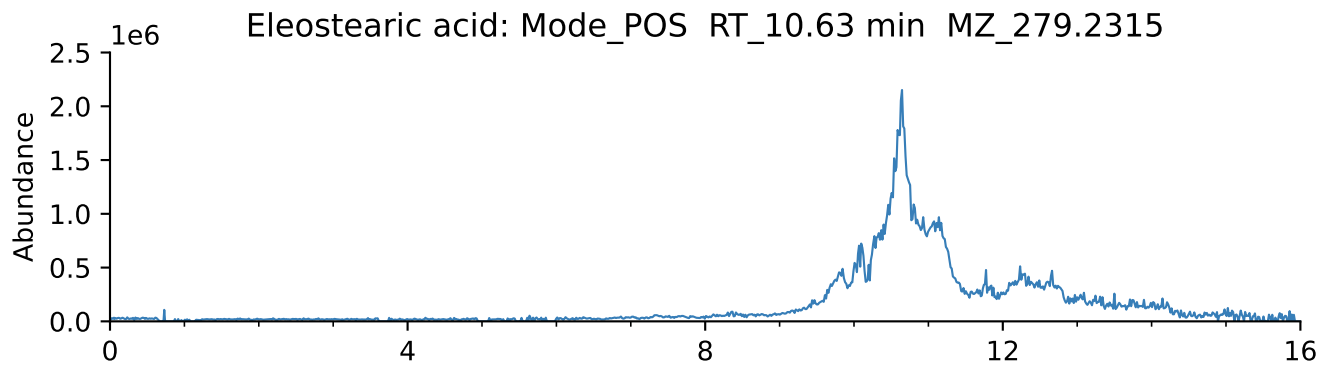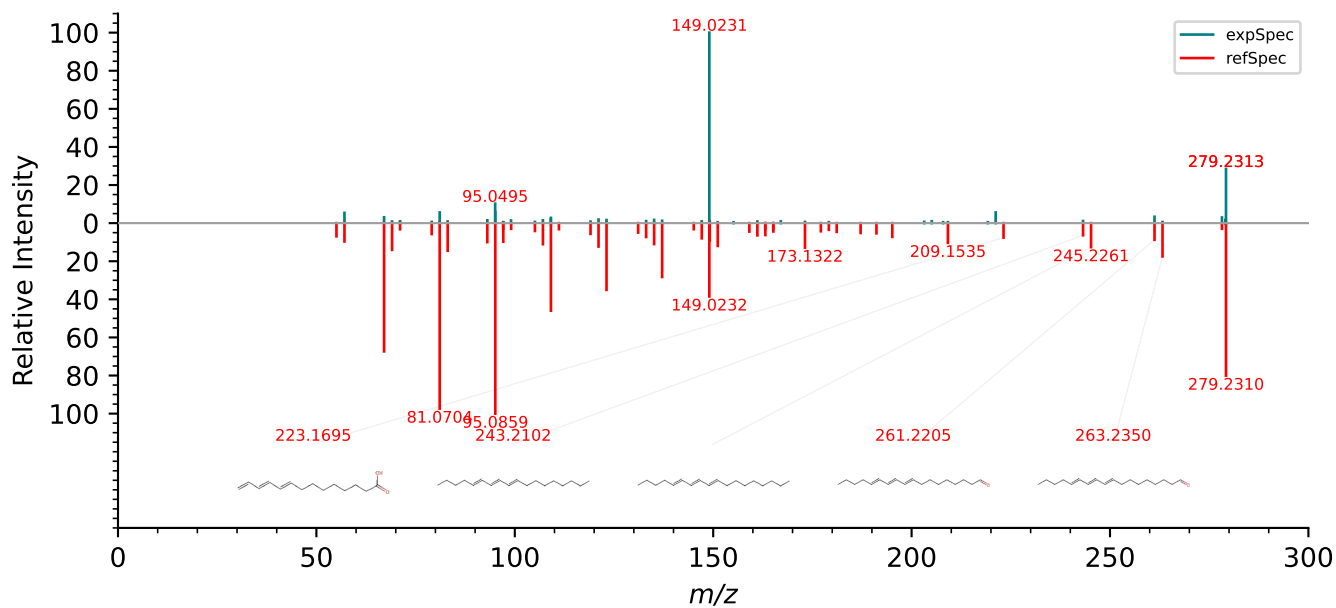

Supplement: identification_of_ingredients.zip [file compound00385.pdf › identification of ingredients/Data analysis/3.mass spectrometry/Original Ingredients/compound00385.pdf]

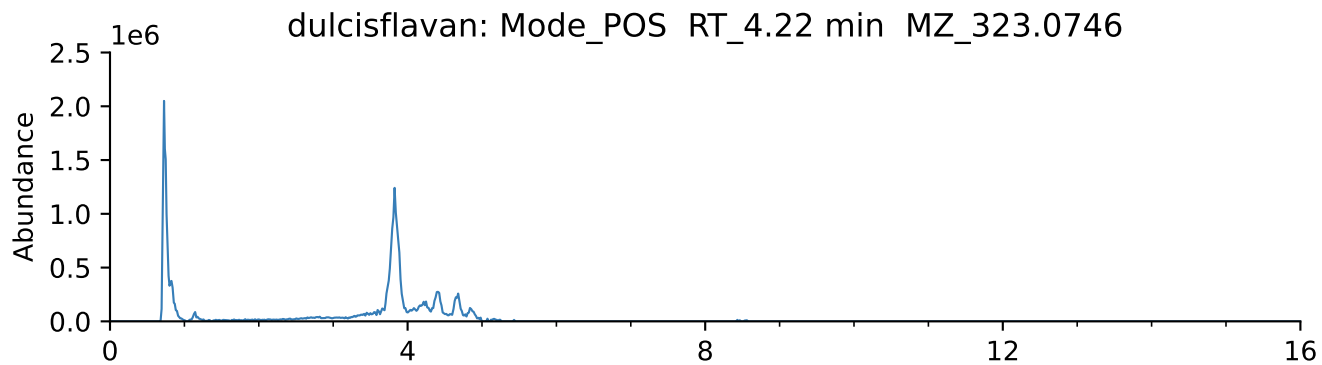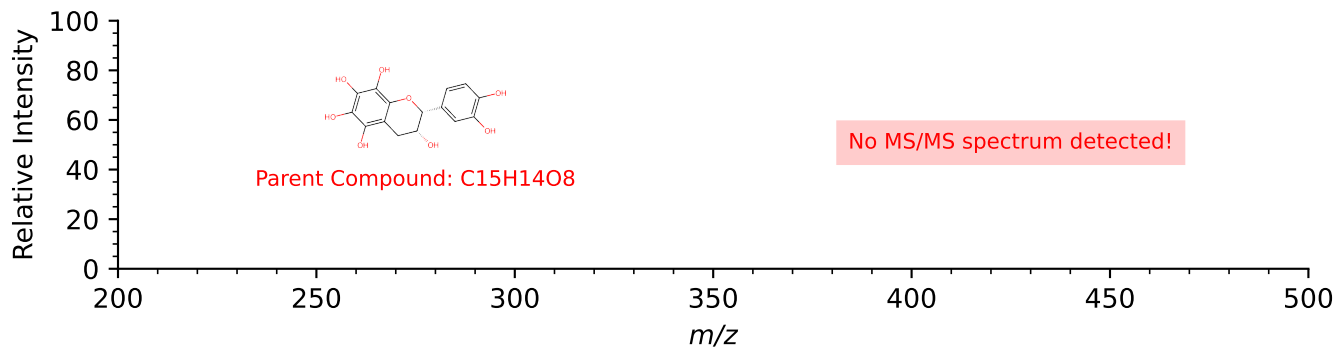

Supplement: identification_of_ingredients.zip [file compound00386.pdf › identification of ingredients/Data analysis/3.mass spectrometry/Original Ingredients/compound00386.pdf]

DL-Valine: Mode\_POS RT\_0.76 min MZ\_118.0864

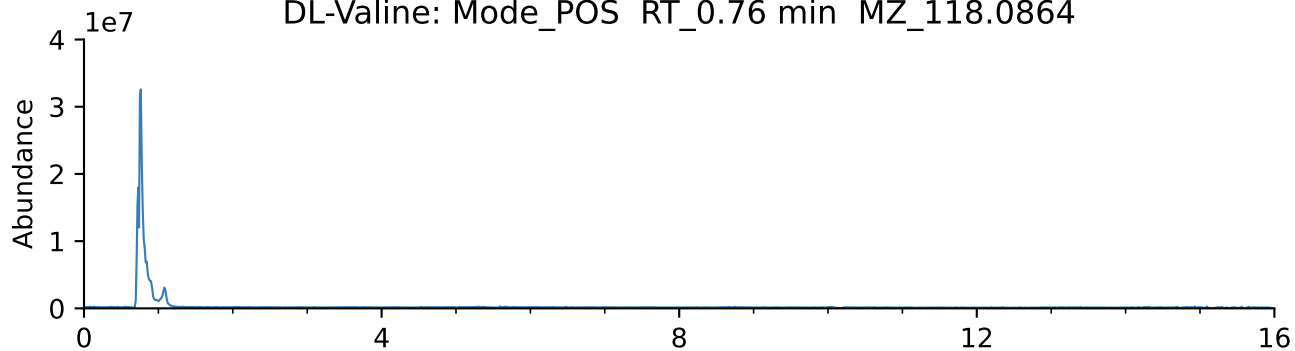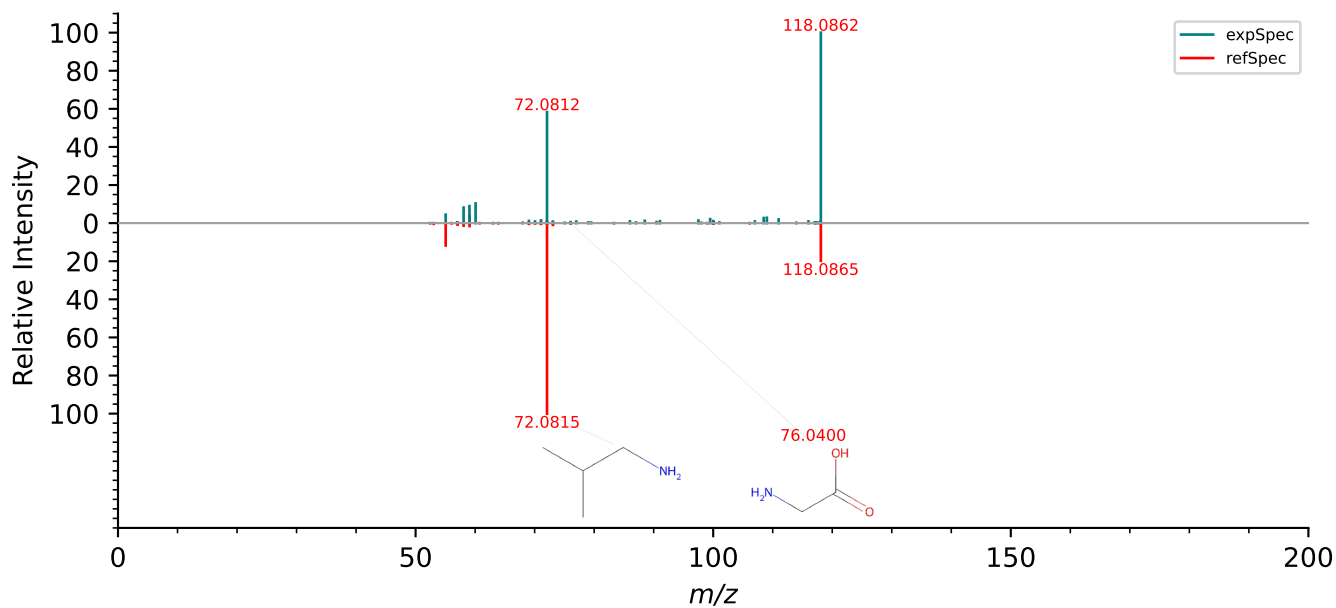

Supplement: identification_of_ingredients.zip [file compound00388.pdf › identification of ingredients/Data analysis/3.mass spectrometry/Original Ingredients/compound00388.pdf]

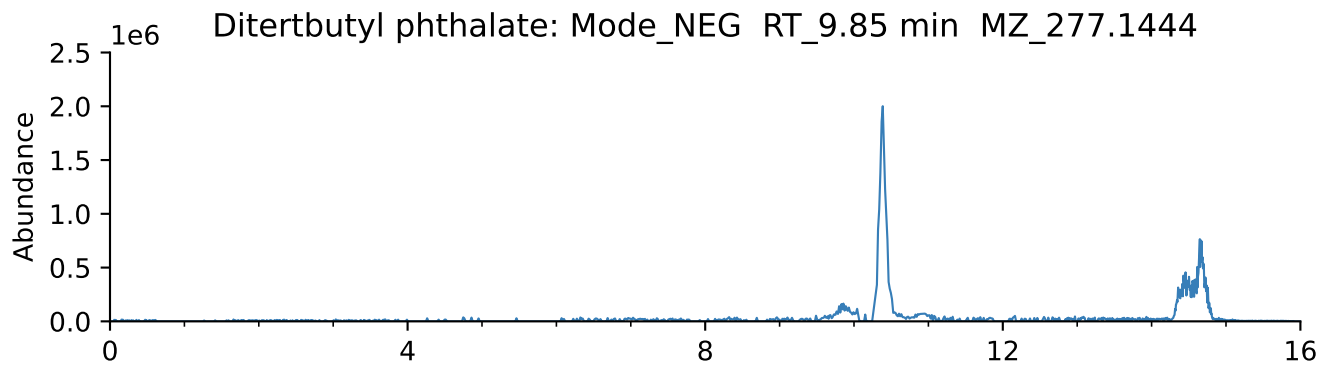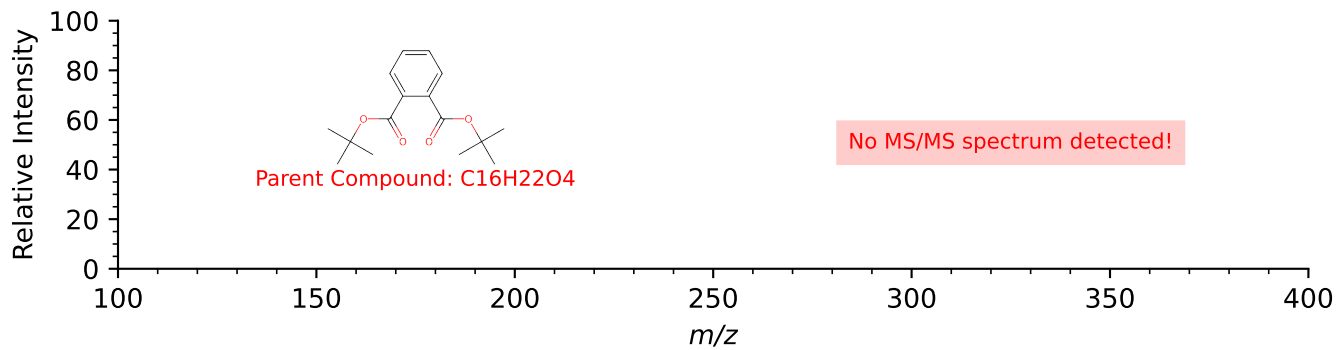

Supplement: identification_of_ingredients.zip [file compound00389.pdf › identification of ingredients/Data analysis/3.mass spectrometry/Original Ingredients/compound00389.pdf]

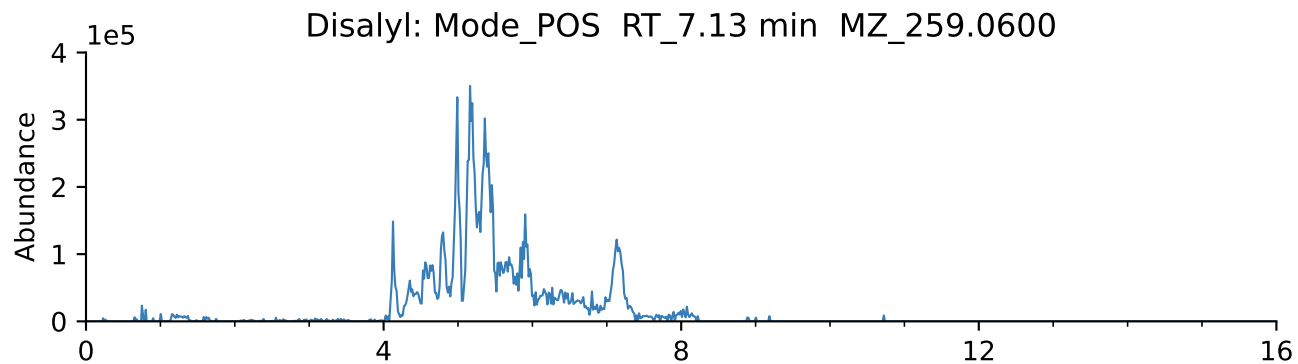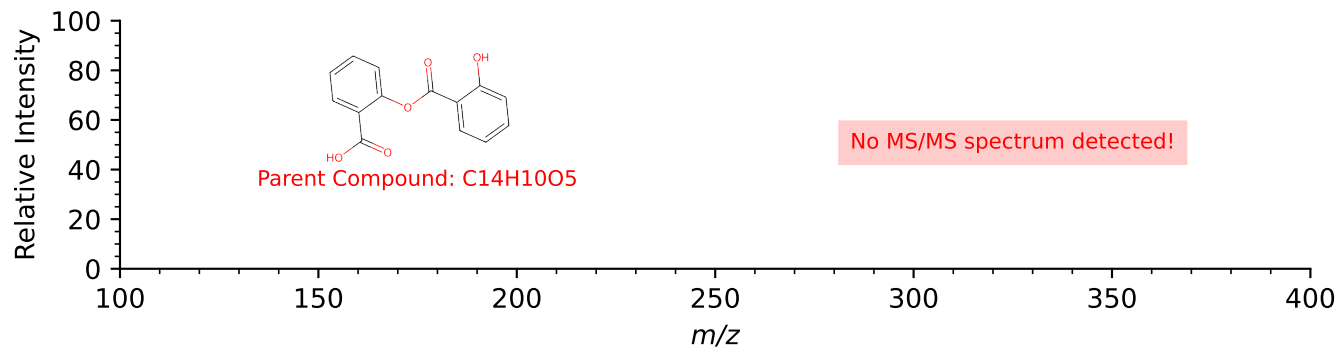

Supplement: identification_of_ingredients.zip [file compound00390.pdf › identification of ingredients/Data analysis/3.mass spectrometry/Original Ingredients/compound00390.pdf]

Dehydroabietic acid methyl ester: Mode\_POS RT\_12.52 min MZ\_315.2315

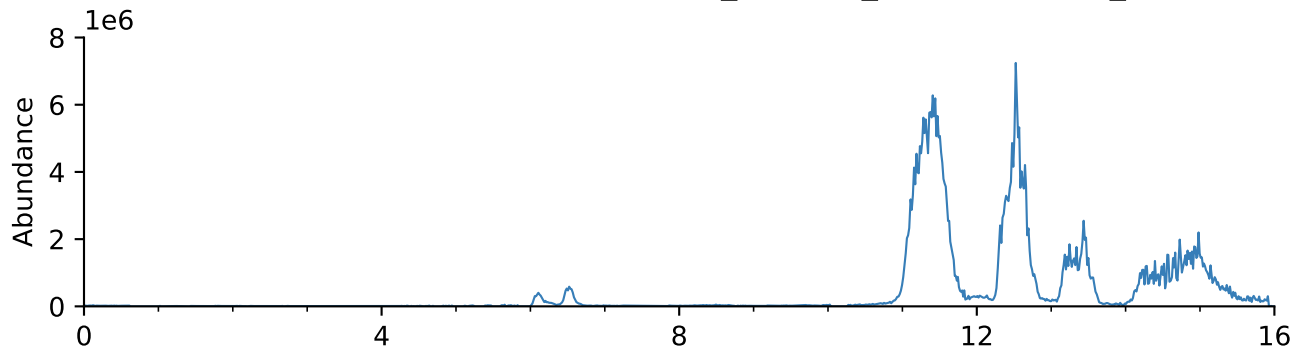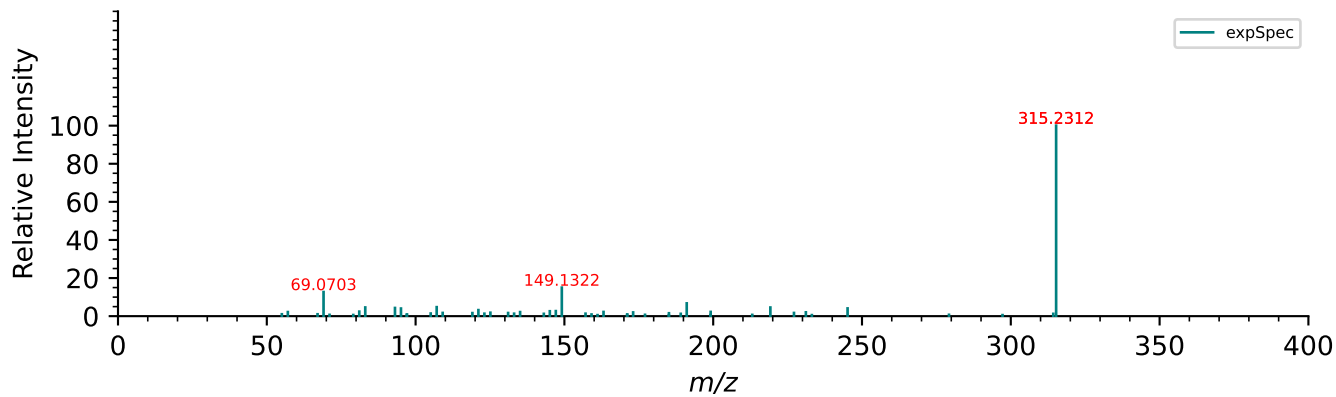

Supplement: identification_of_ingredients.zip [file compound00393.pdf › identification of ingredients/Data analysis/3.mass spectrometry/Original Ingredients/compound00393.pdf]

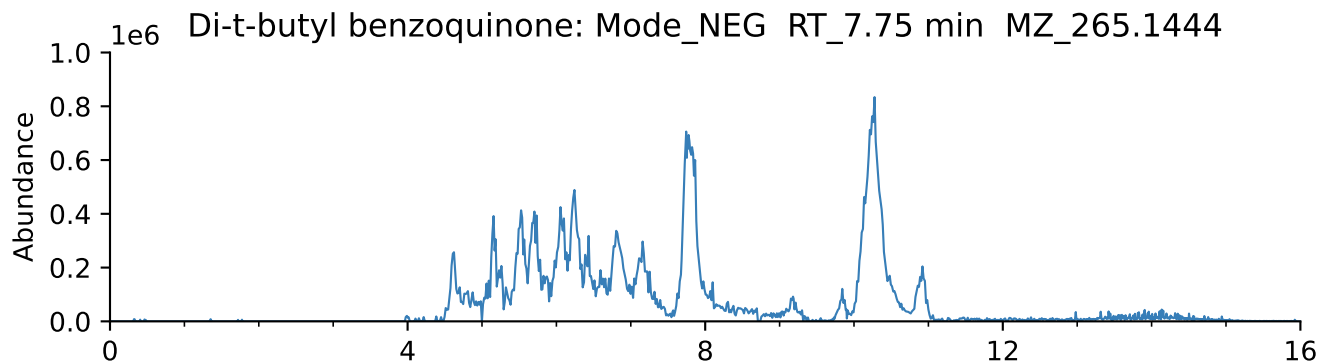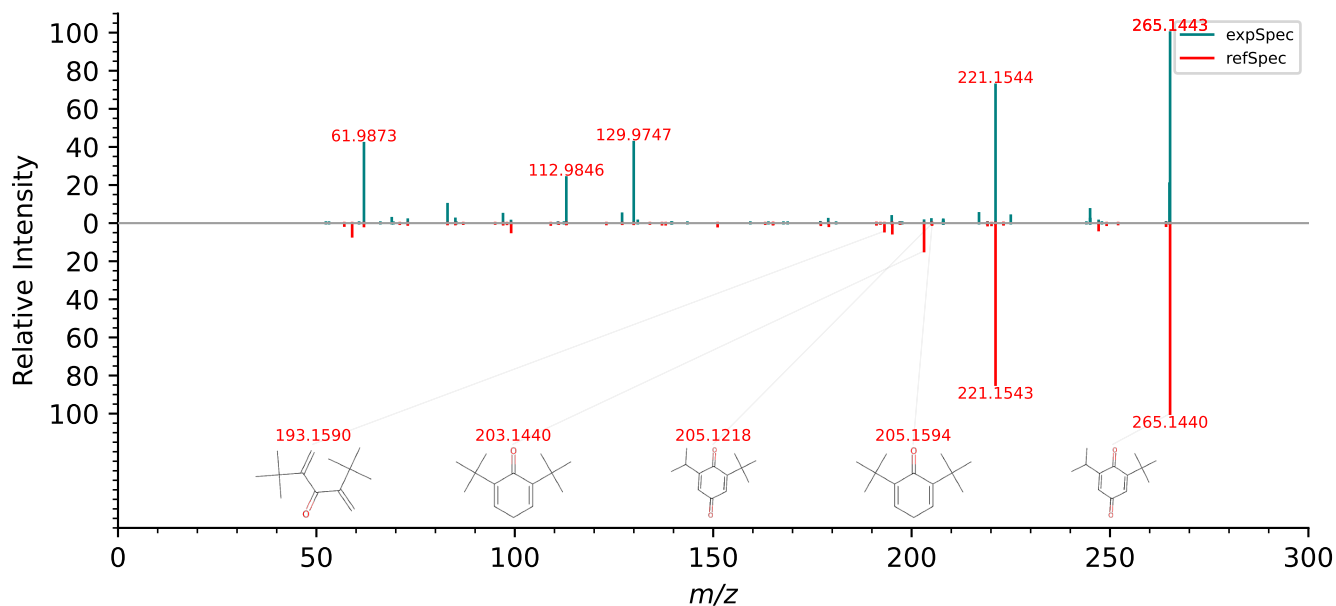

Supplement: identification_of_ingredients.zip [file compound00394.pdf › identification of ingredients/Data analysis/3.mass spectrometry/Original Ingredients/compound00394.pdf]

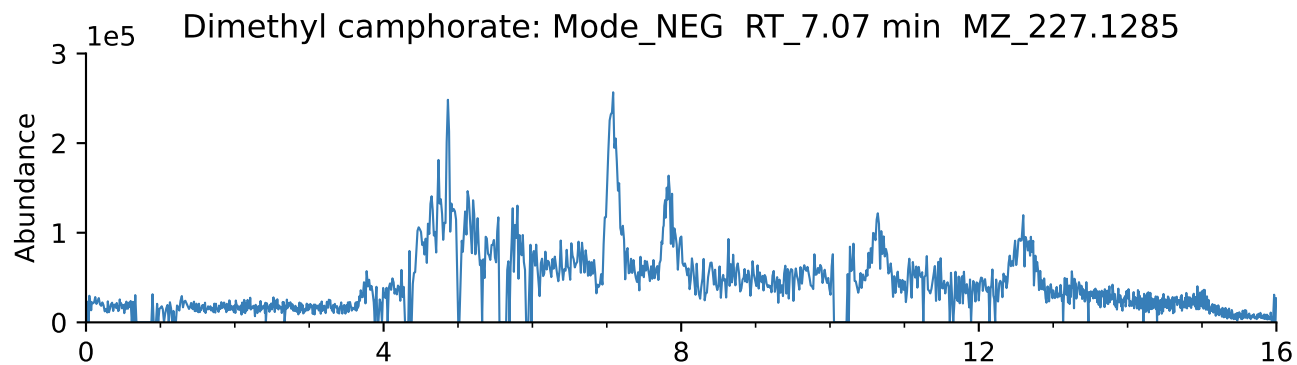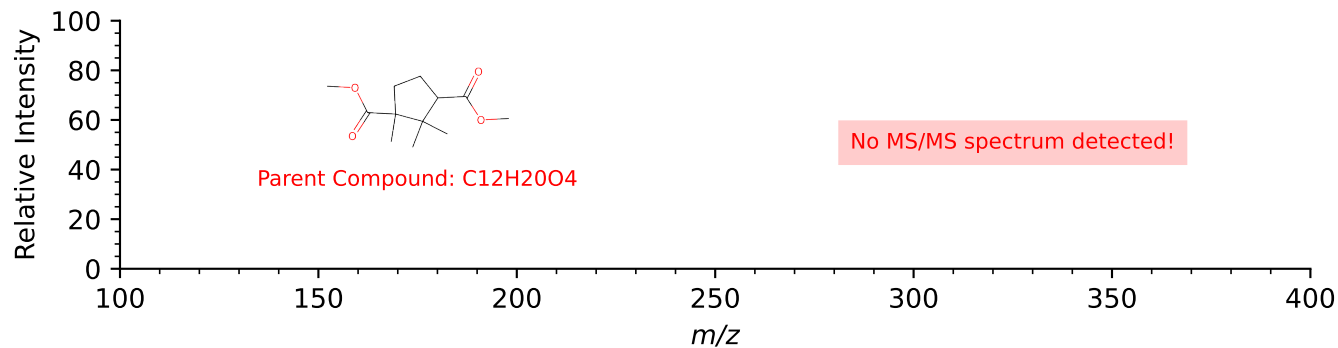

Supplement: identification_of_ingredients.zip [file compound00401.pdf › identification of ingredients/Data analysis/3.mass spectrometry/Original Ingredients/compound00401.pdf]

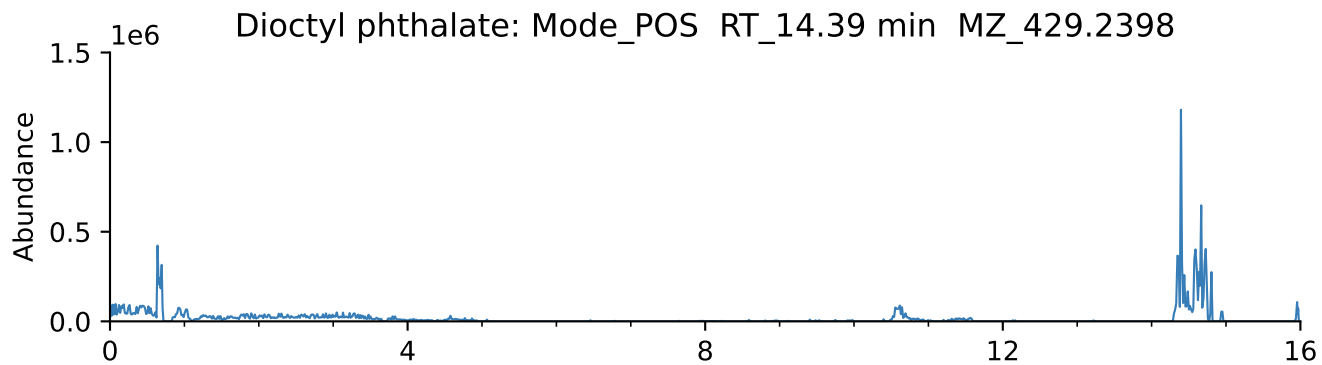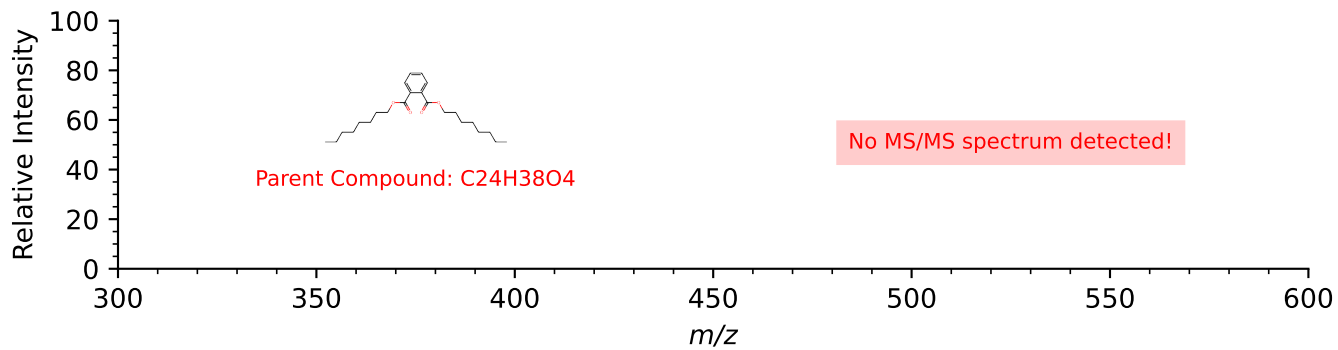

Supplement: identification_of_ingredients.zip [file compound00402.pdf › identification of ingredients/Data analysis/3.mass spectrometry/Original Ingredients/compound00402.pdf]

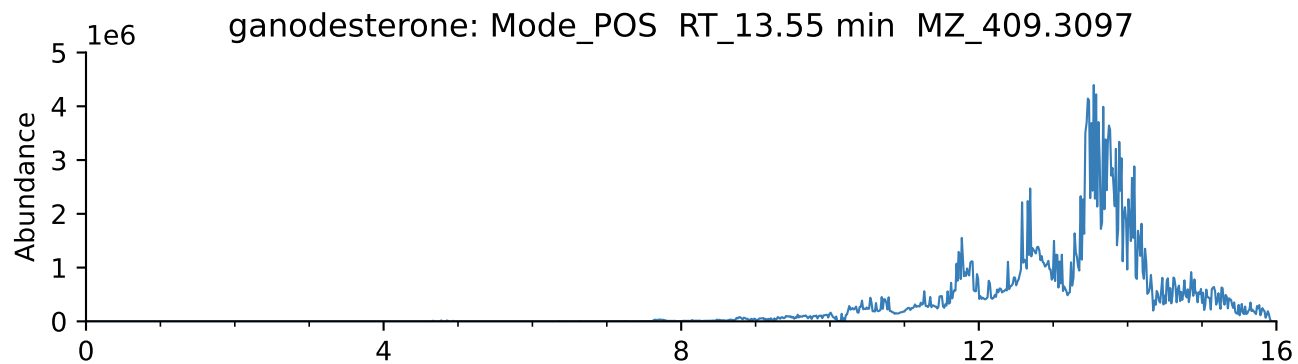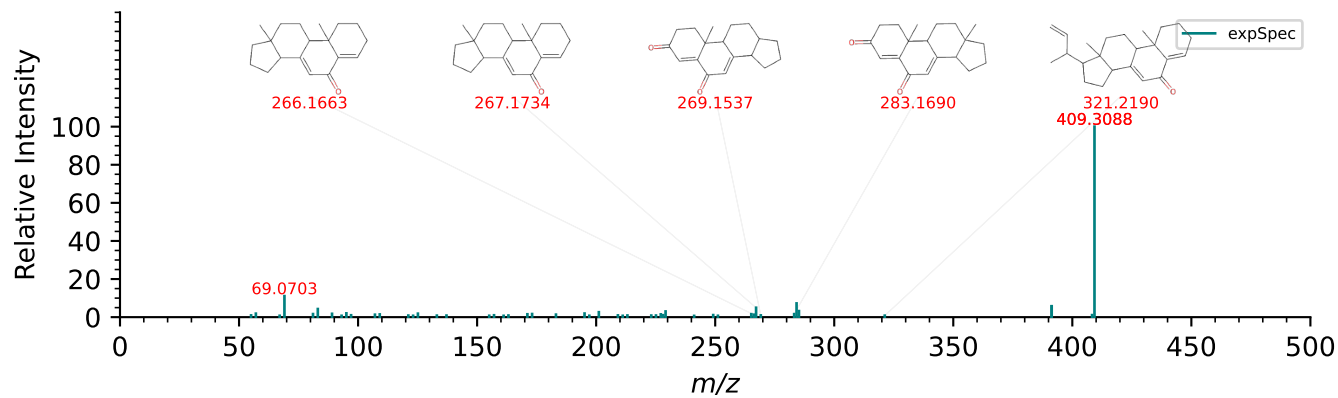

Supplement: identification_of_ingredients.zip [file compound00411.pdf › identification of ingredients/Data analysis/3.mass spectrometry/Original Ingredients/compound00411.pdf]

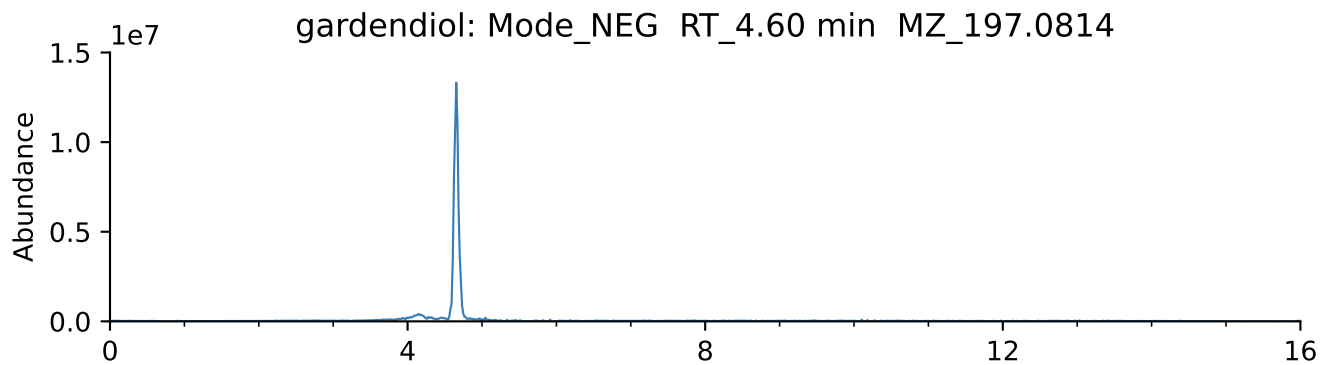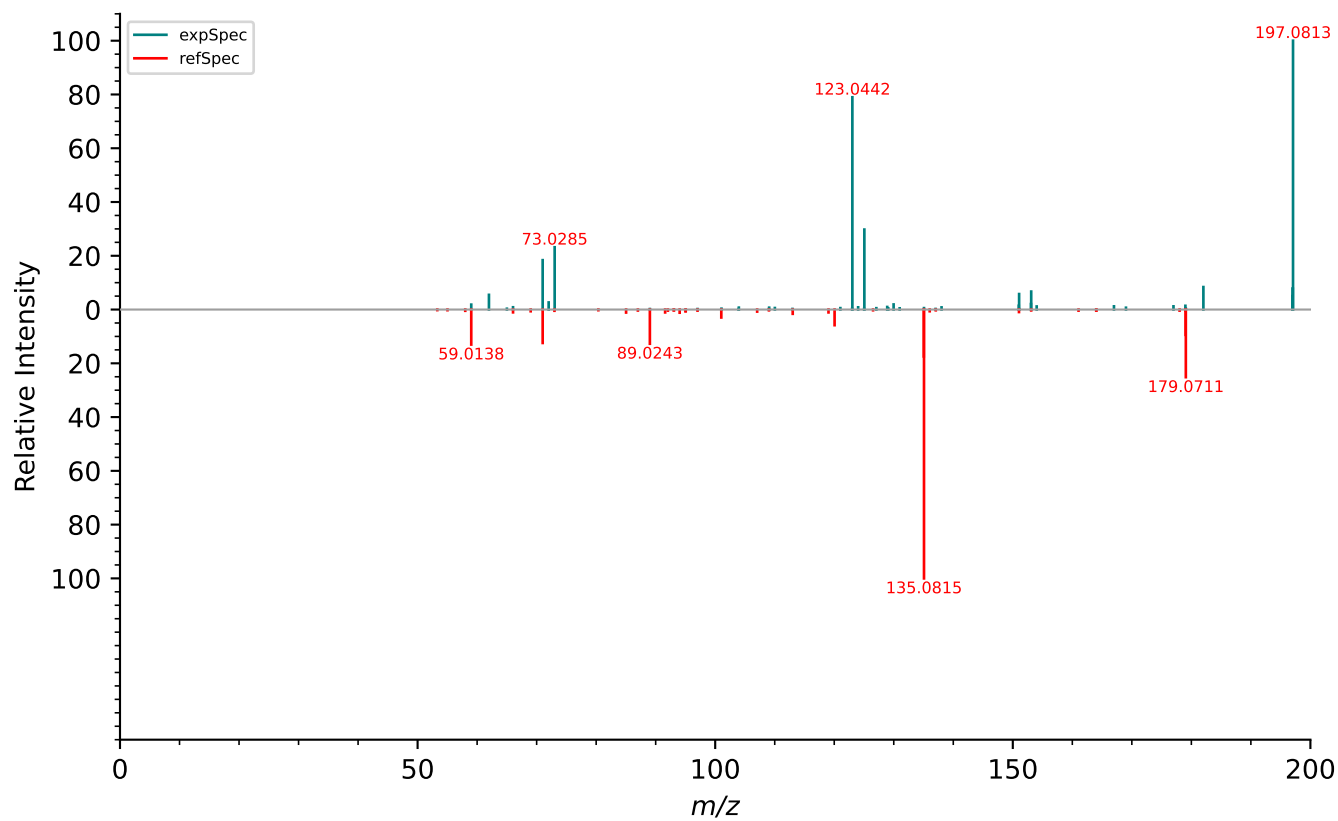

Supplement: identification_of_ingredients.zip [file compound00413.pdf › identification of ingredients/Data analysis/3.mass spectrometry/Original Ingredients/compound00413.pdf]

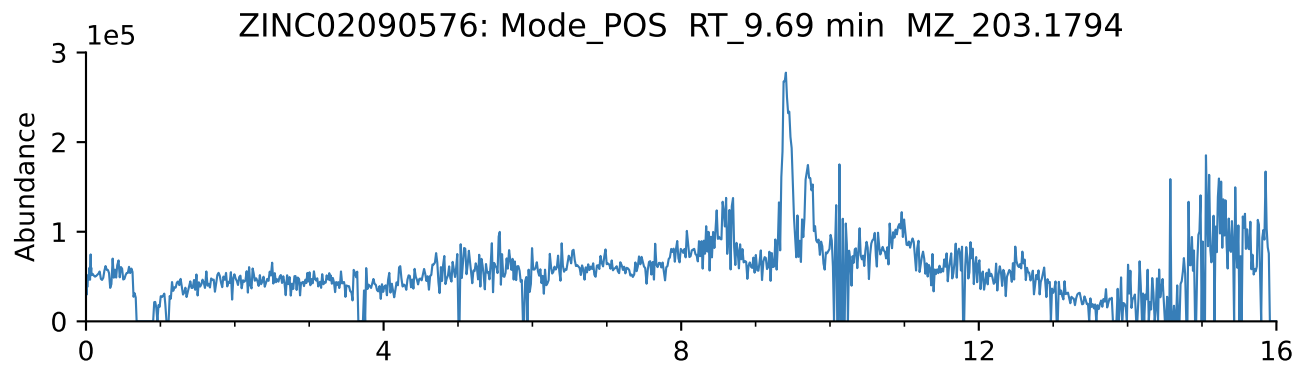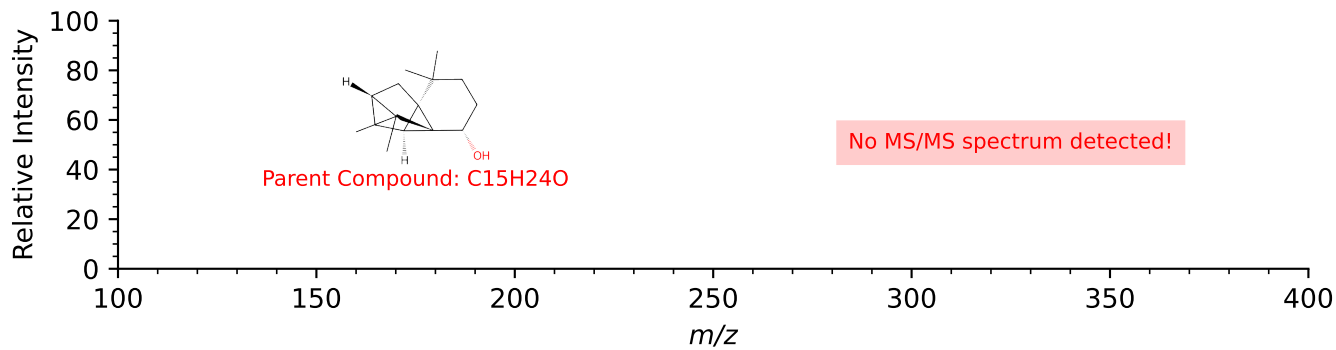

Supplement: identification_of_ingredients.zip [file compound00415.pdf › identification of ingredients/Data analysis/3.mass spectrometry/Original Ingredients/compound00415.pdf]

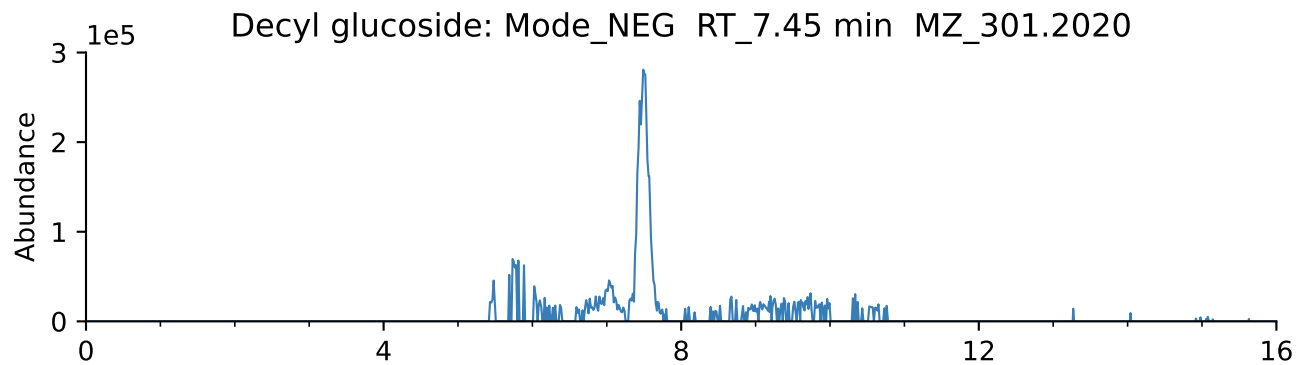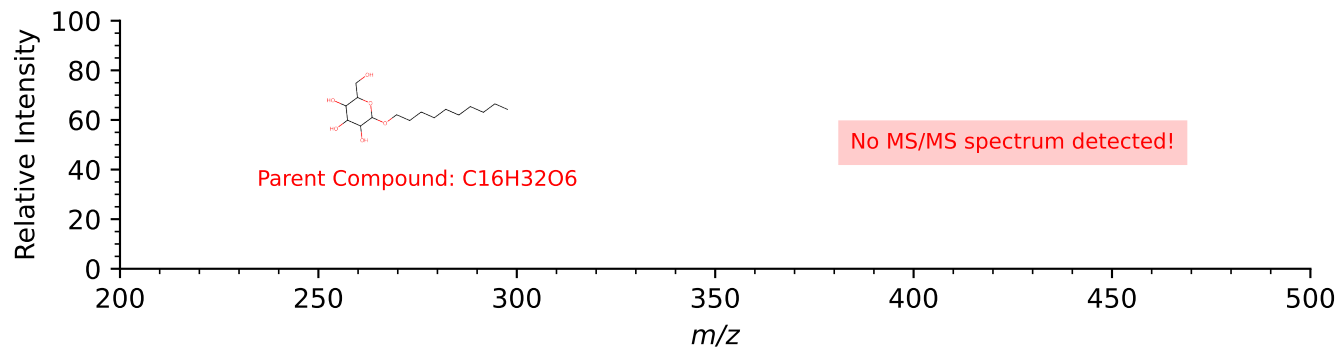

Supplement: identification_of_ingredients.zip [file compound00416.pdf › identification of ingredients/Data analysis/3.mass spectrometry/Original Ingredients/compound00416.pdf]

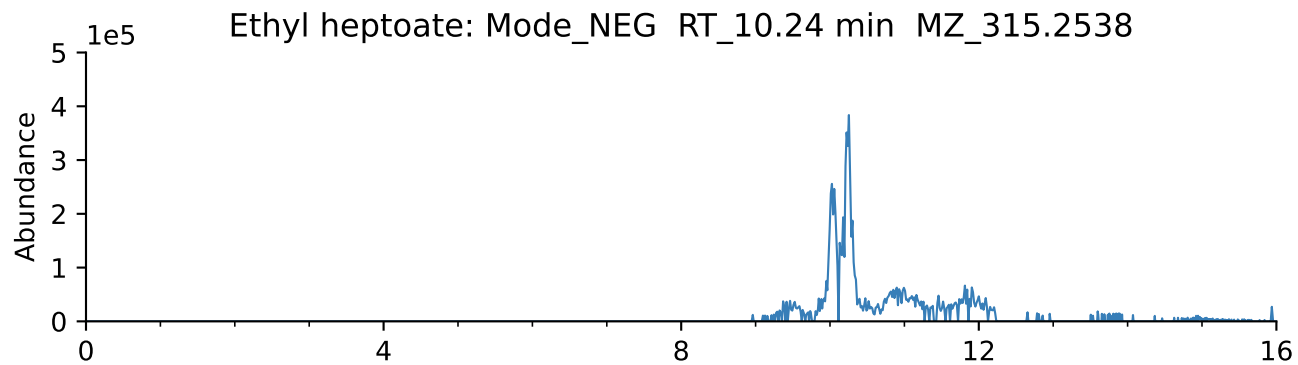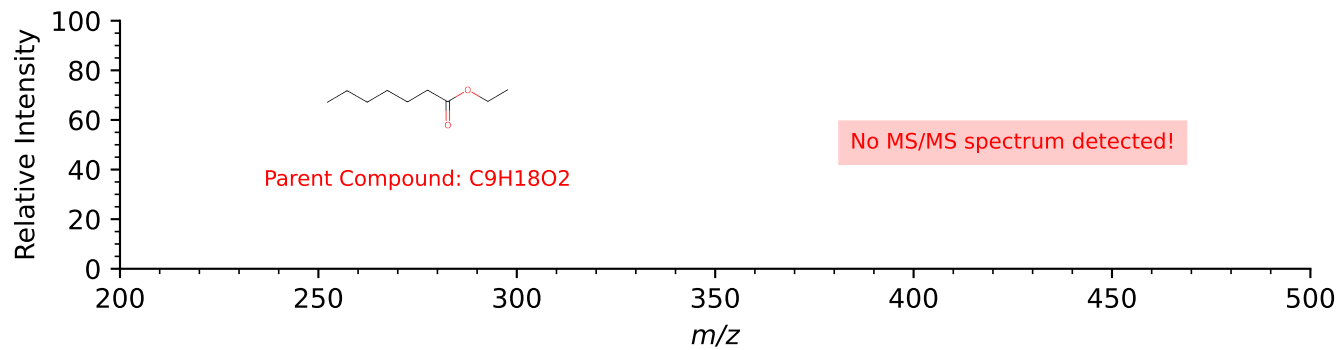

Supplement: identification_of_ingredients.zip [file compound00420.pdf › identification of ingredients/Data analysis/3.mass spectrometry/Original Ingredients/compound00420.pdf]

Eupatolide: Mode\_NEG RT\_8.92 min MZ\_247.1337

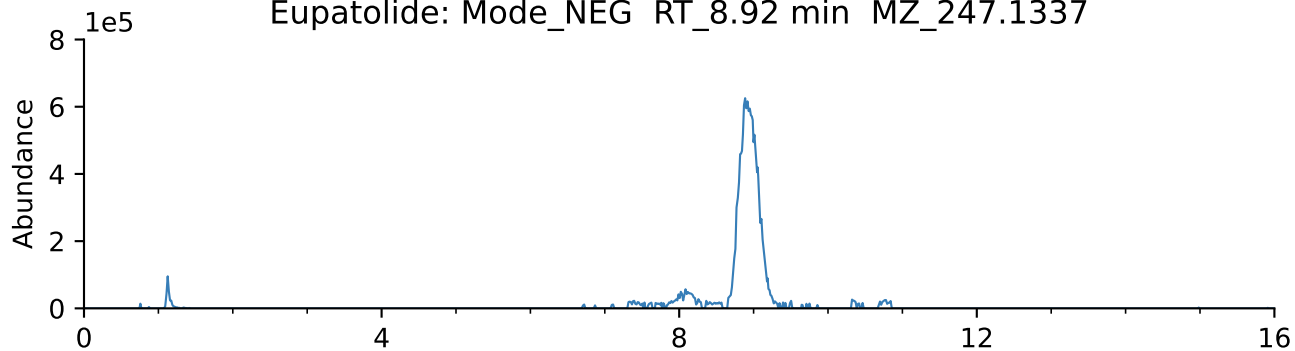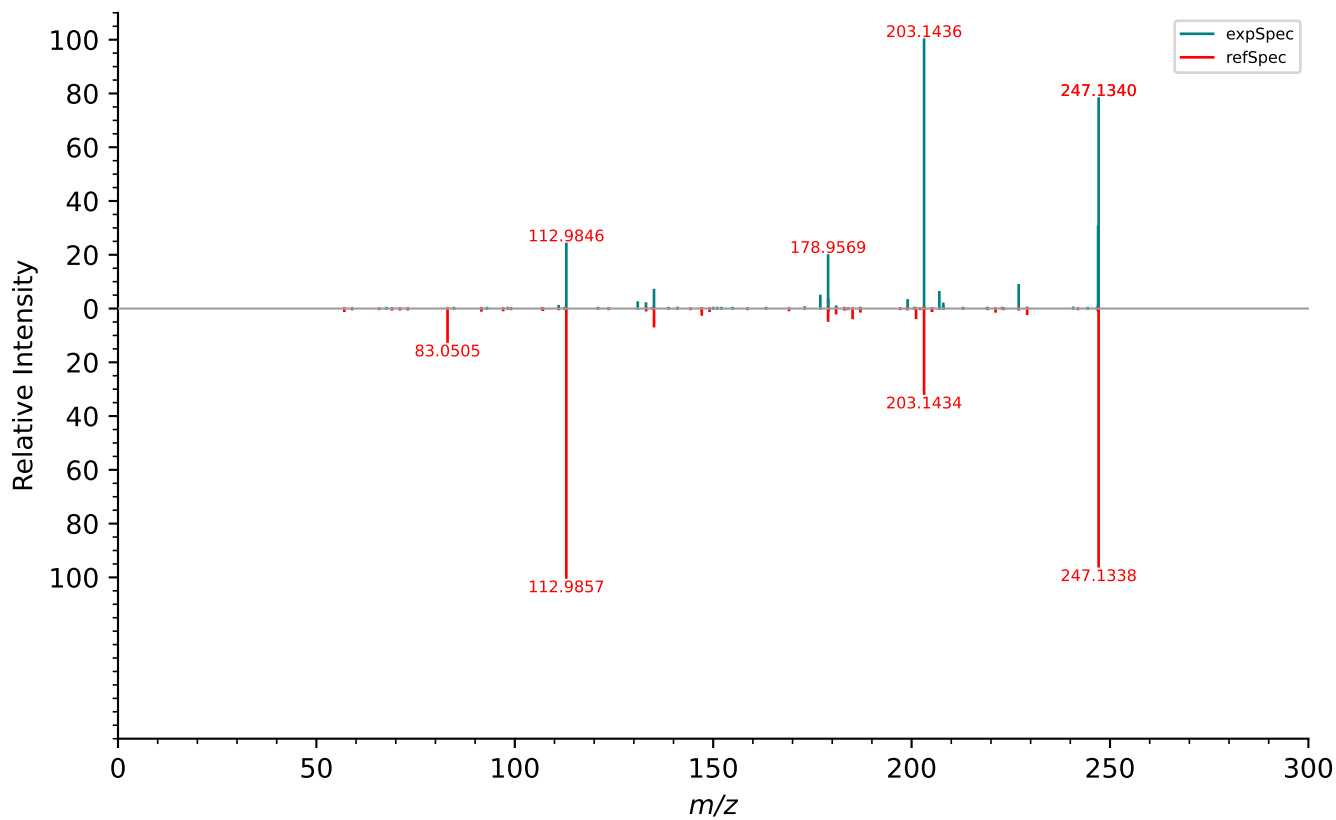

Supplement: identification_of_ingredients.zip [file compound00421.pdf › identification of ingredients/Data analysis/3.mass spectrometry/Original Ingredients/compound00421.pdf]

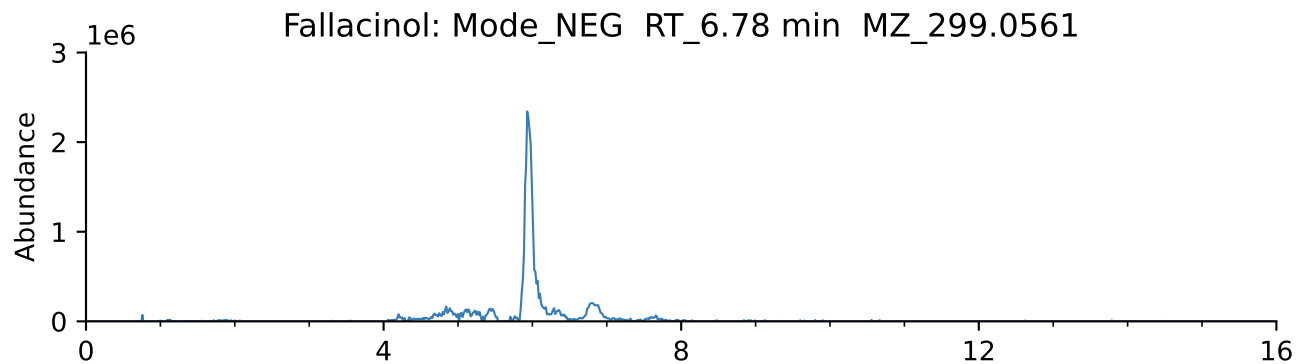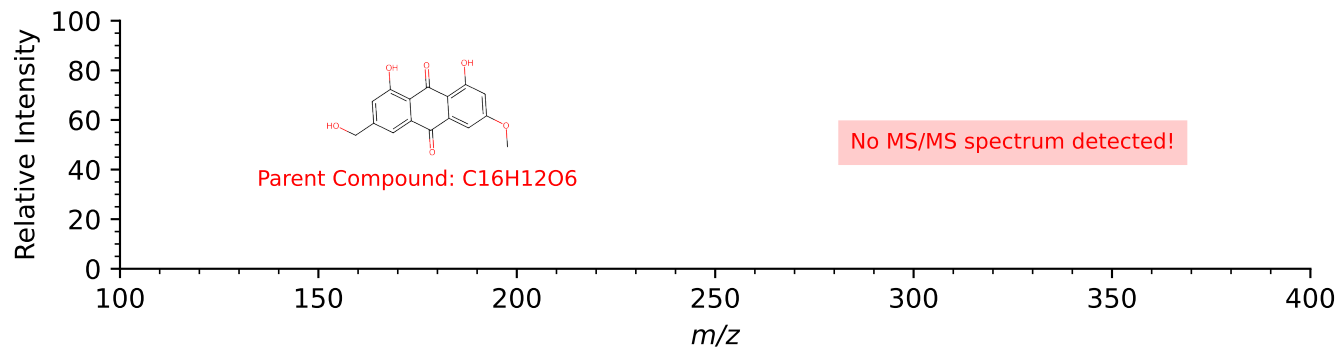

Supplement: identification_of_ingredients.zip [file compound00422.pdf › identification of ingredients/Data analysis/3.mass spectrometry/Original Ingredients/compound00422.pdf]

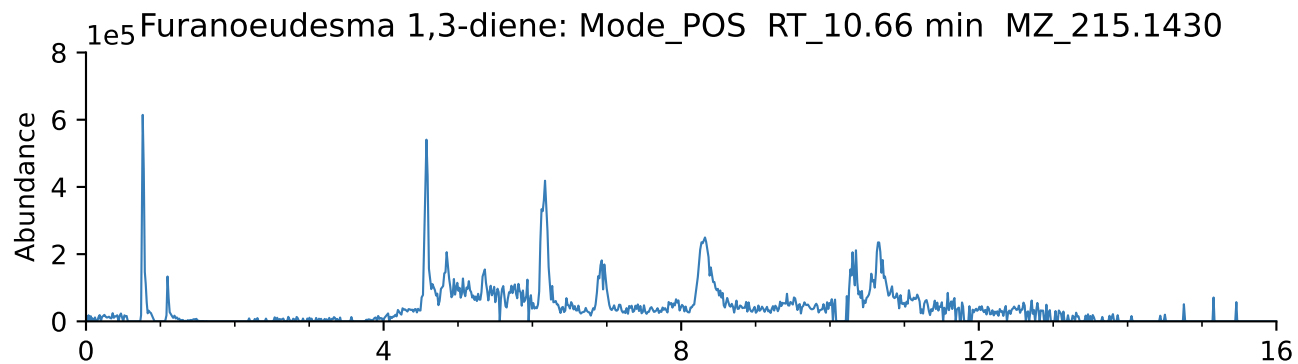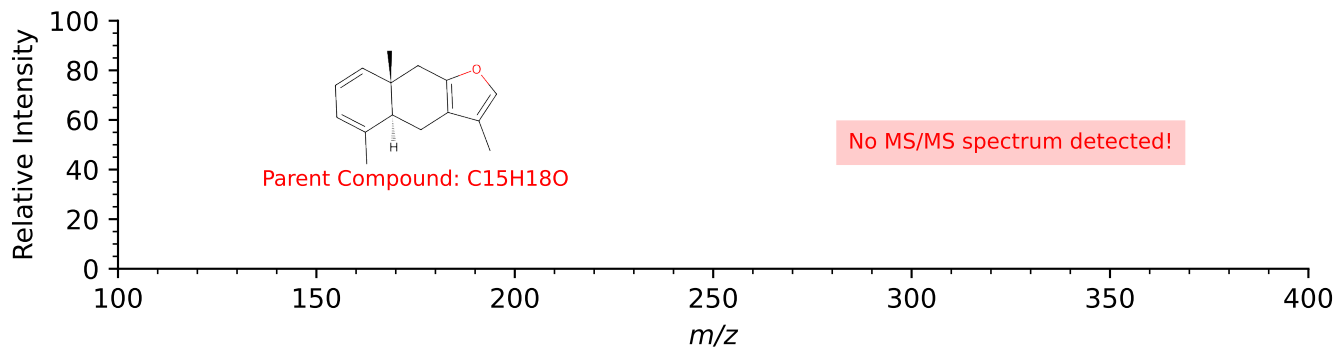

Supplement: identification_of_ingredients.zip [file compound00423.pdf › identification of ingredients/Data analysis/3.mass spectrometry/Original Ingredients/compound00423.pdf]

Fufural: Mode\_NEG RT\_4.58 min MZ\_191.0344

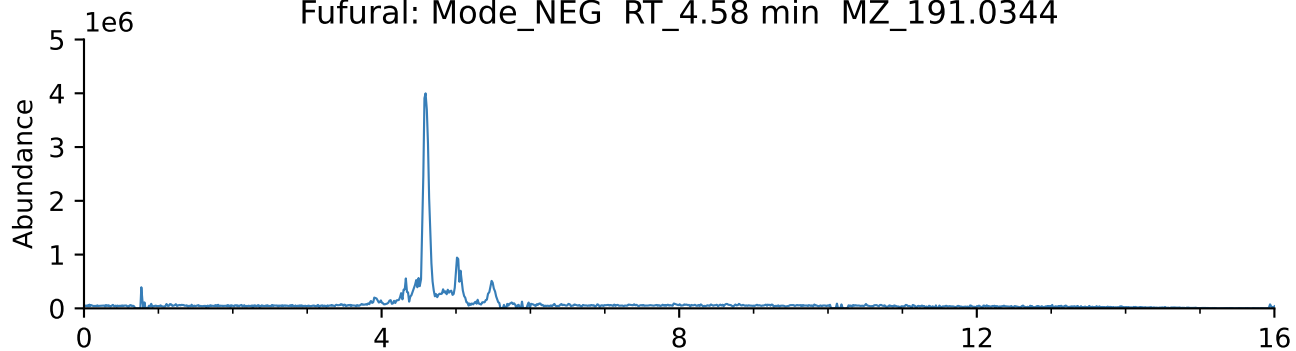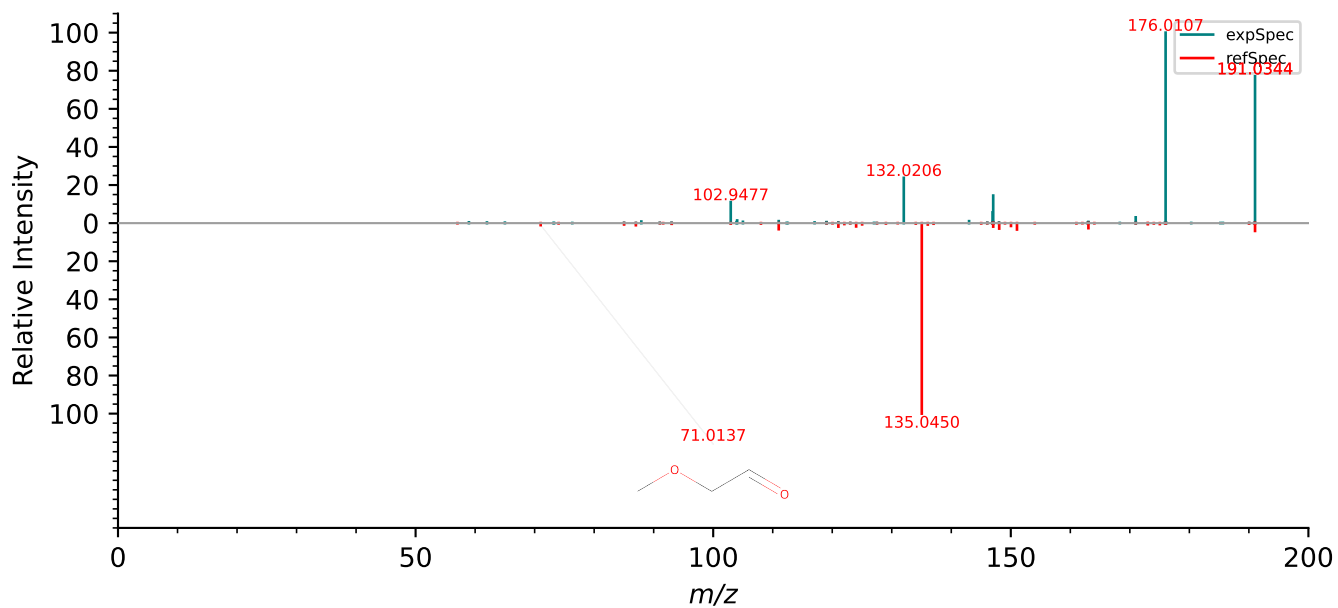

Supplement: identification_of_ingredients.zip [file compound00428.pdf › identification of ingredients/Data analysis/3.mass spectrometry/Original Ingredients/compound00428.pdf]

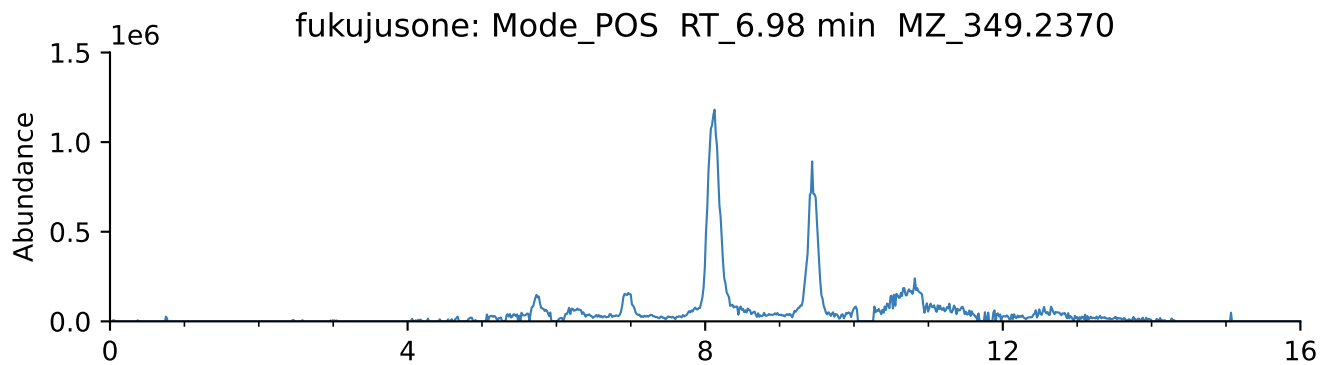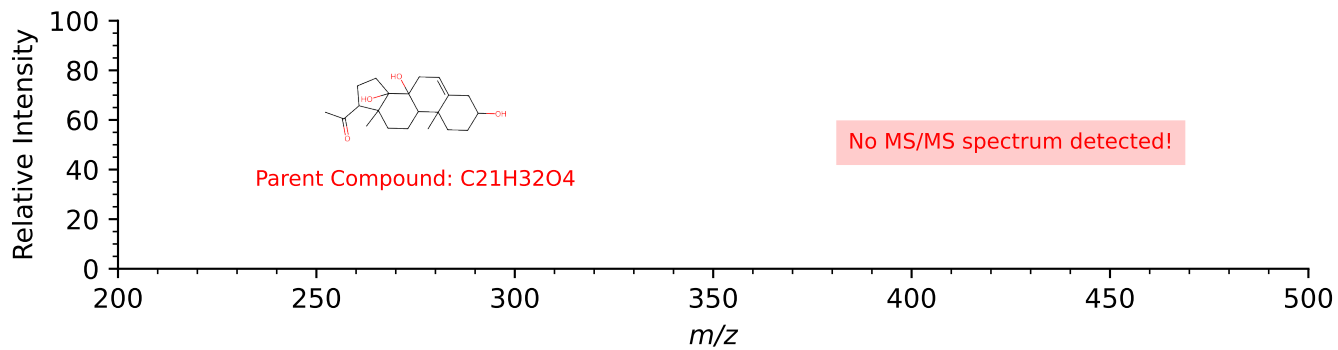

Supplement: identification_of_ingredients.zip [file compound00429.pdf › identification of ingredients/Data analysis/3.mass spectrometry/Original Ingredients/compound00429.pdf]

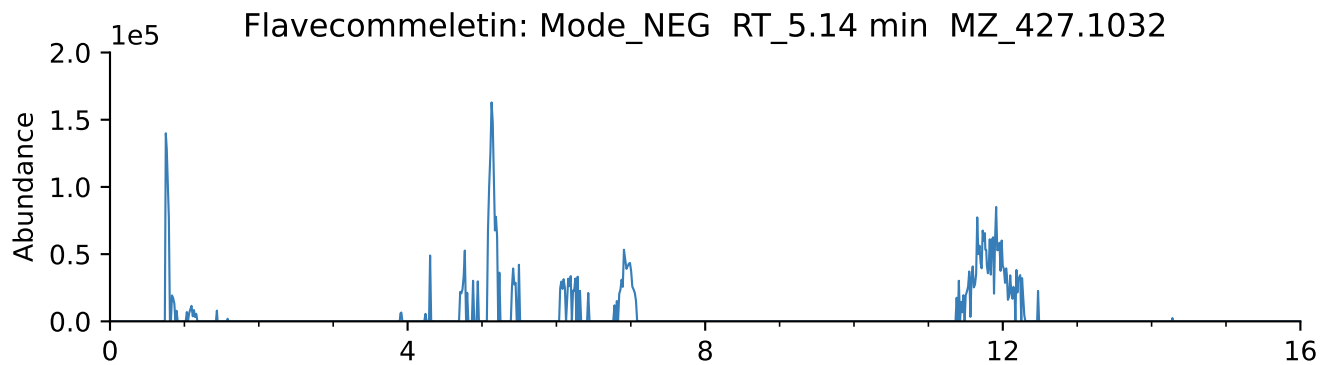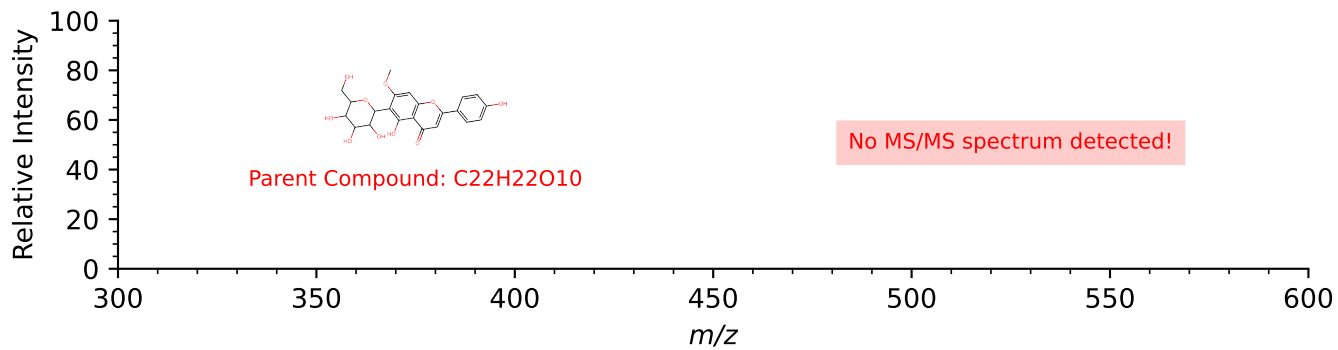

Supplement: identification_of_ingredients.zip [file compound00430.pdf › identification of ingredients/Data analysis/3.mass spectrometry/Original Ingredients/compound00430.pdf]

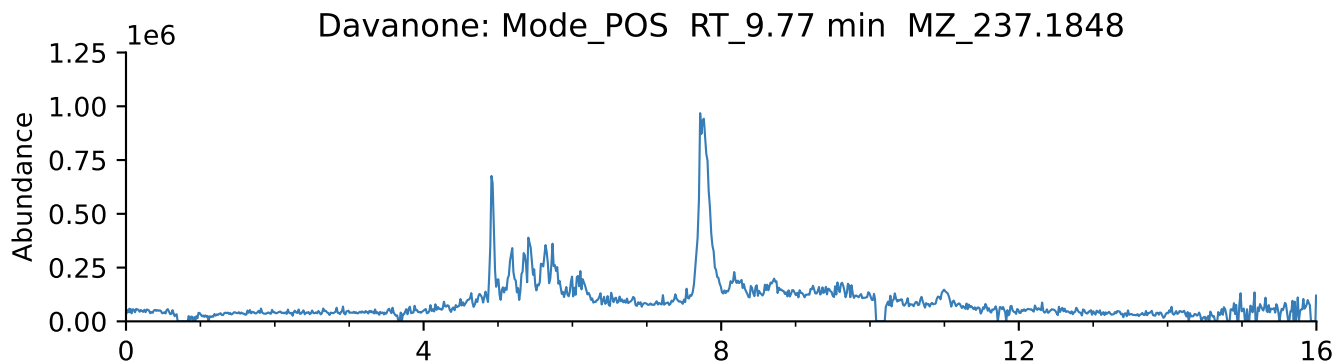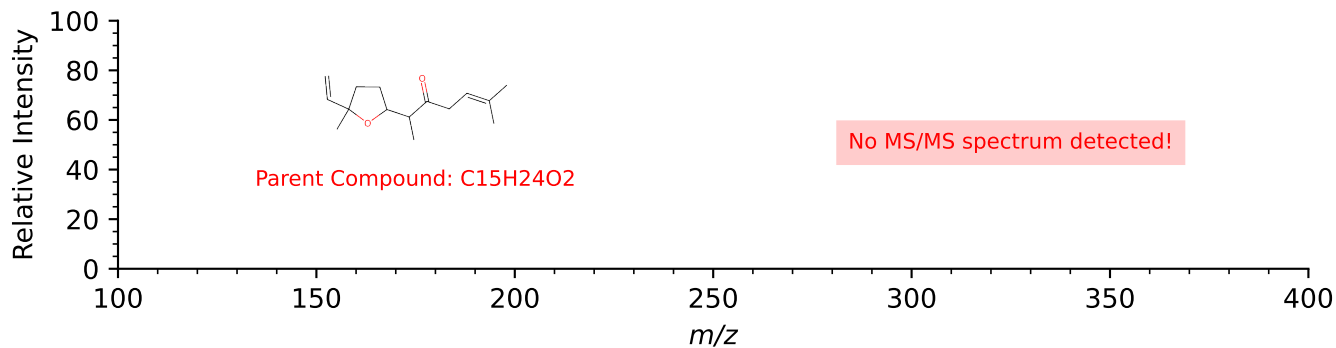

Supplement: identification_of_ingredients.zip [file compound00431.pdf › identification of ingredients/Data analysis/3.mass spectrometry/Original Ingredients/compound00431.pdf]

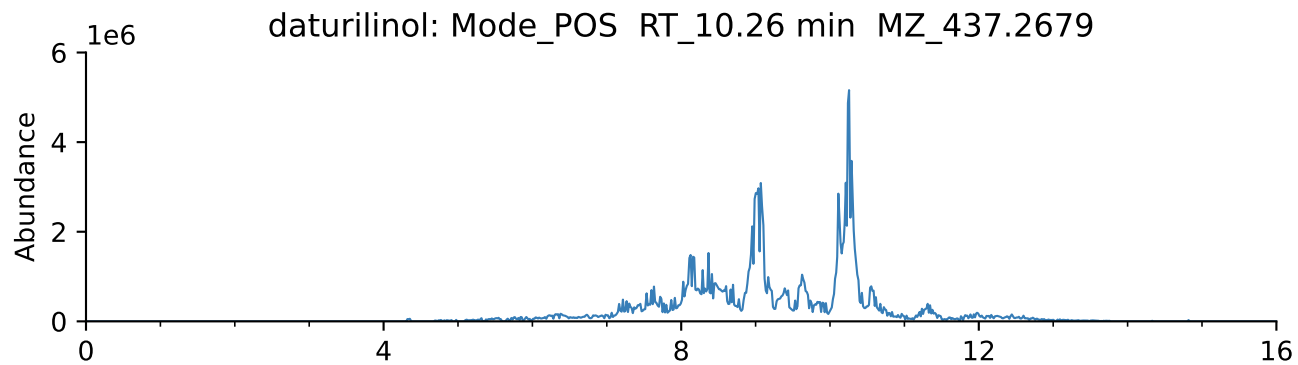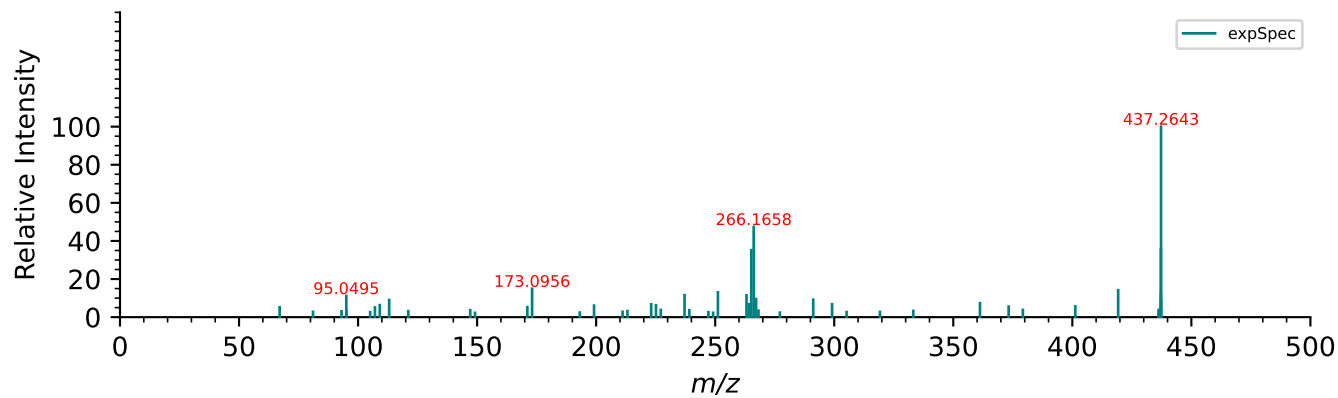

Supplement: identification_of_ingredients.zip [file compound00432.pdf › identification of ingredients/Data analysis/3.mass spectrometry/Original Ingredients/compound00432.pdf]

Blumenol C: Mode\_POS RT\_8.05 min MZ\_228.1957

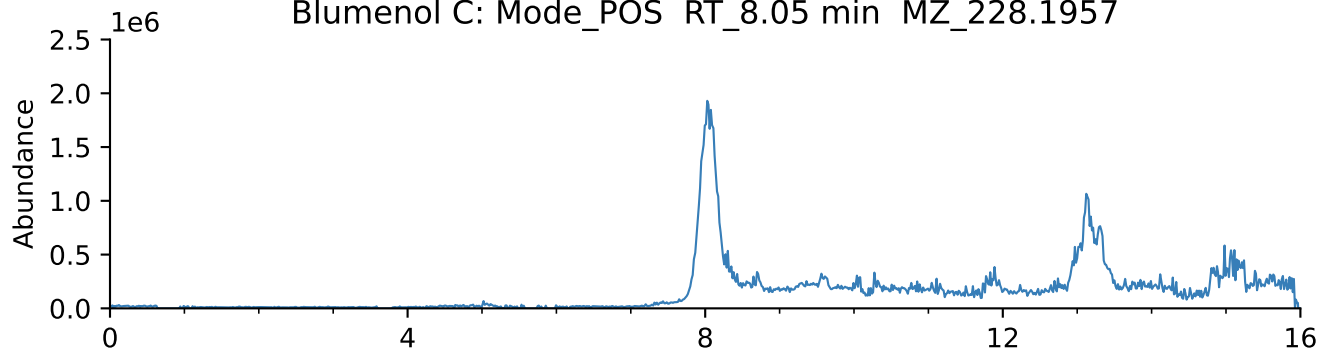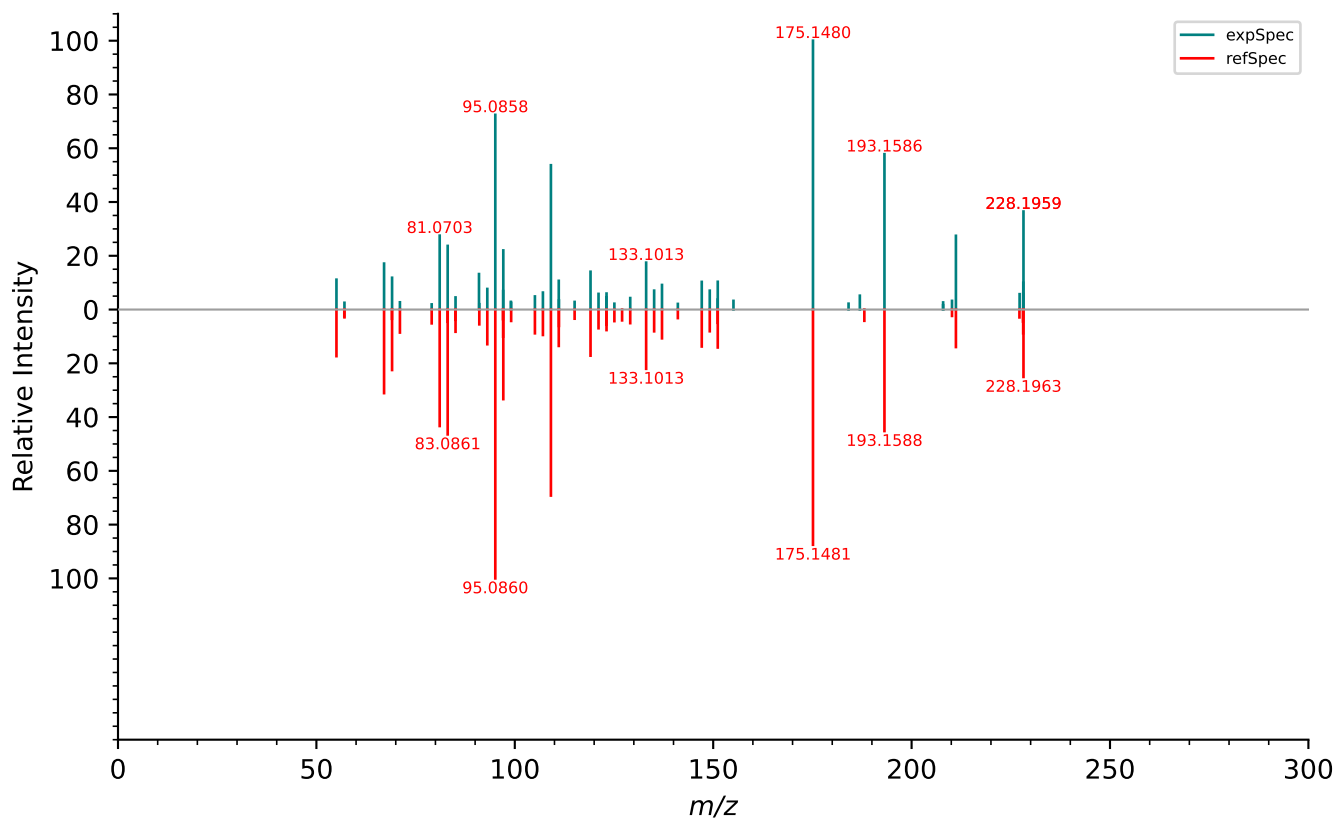

Supplement: identification_of_ingredients.zip [file compound00437.pdf › identification of ingredients/Data analysis/3.mass spectrometry/Original Ingredients/compound00437.pdf]

Benzyl EC-D-glucopyranoside: Mode\_POS RT\_4.10 min MZ\_293.0996

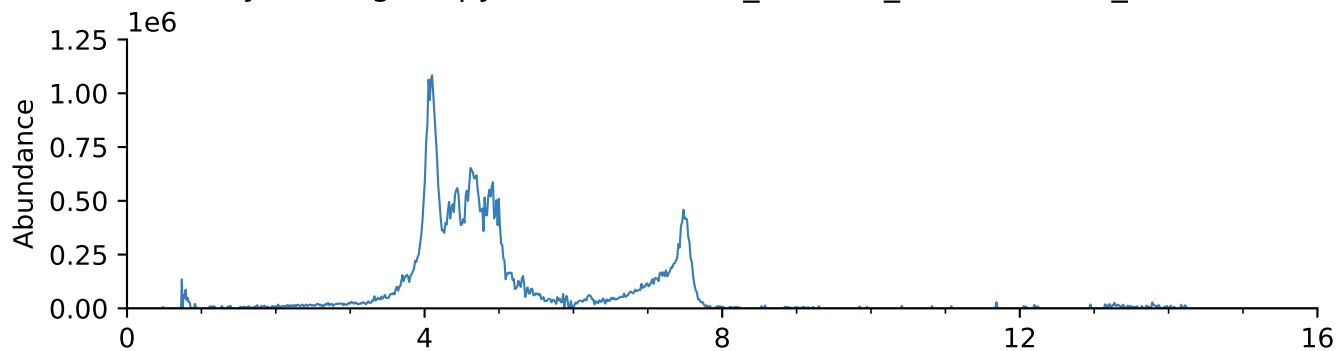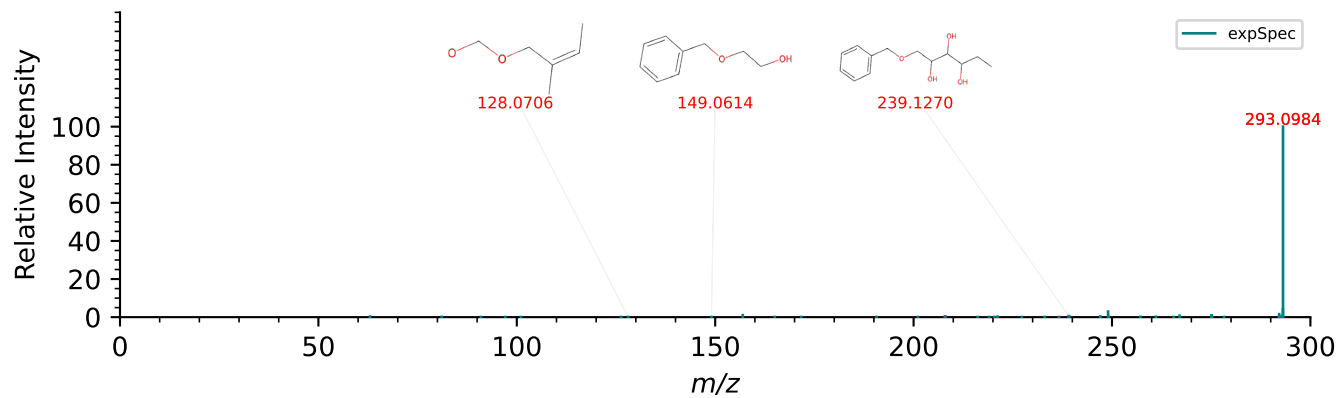

Supplement: identification_of_ingredients.zip [file compound00438.pdf › identification of ingredients/Data analysis/3.mass spectrometry/Original Ingredients/compound00438.pdf]

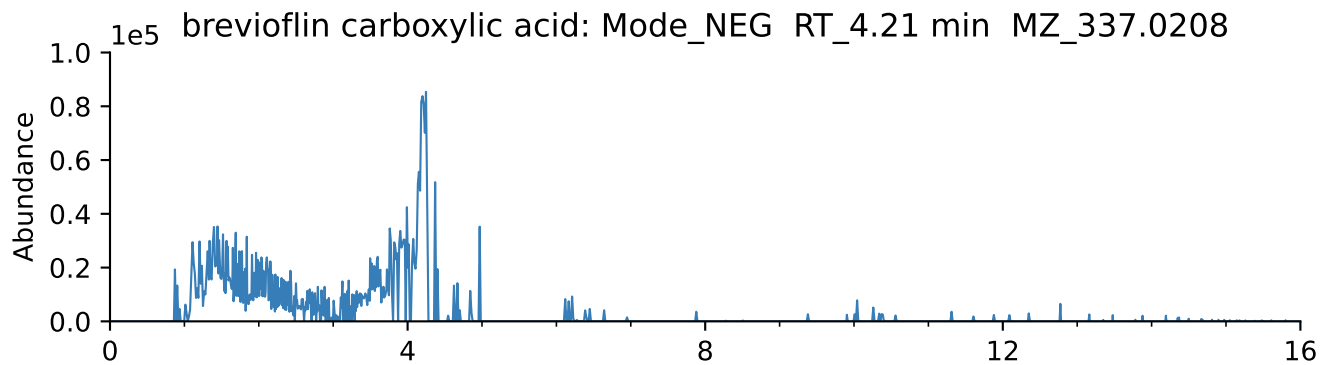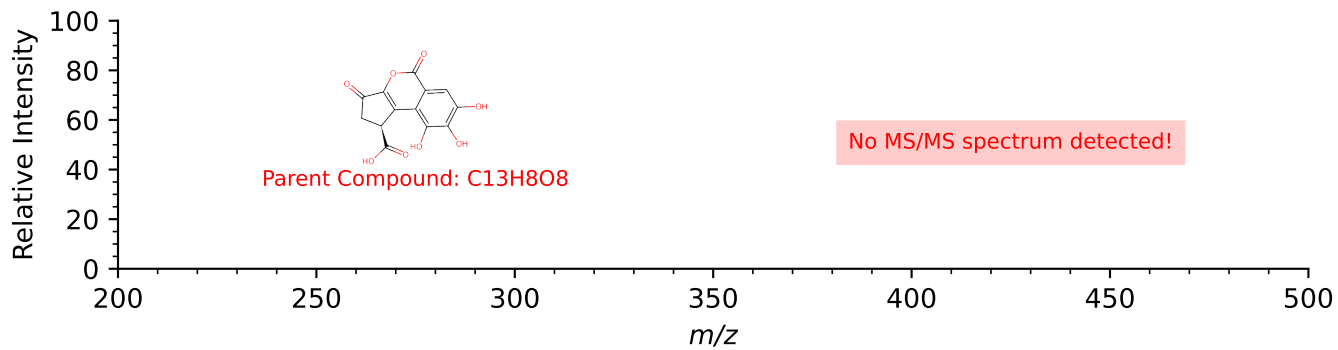

Supplement: identification_of_ingredients.zip [file compound00441.pdf › identification of ingredients/Data analysis/3.mass spectrometry/Original Ingredients/compound00441.pdf]

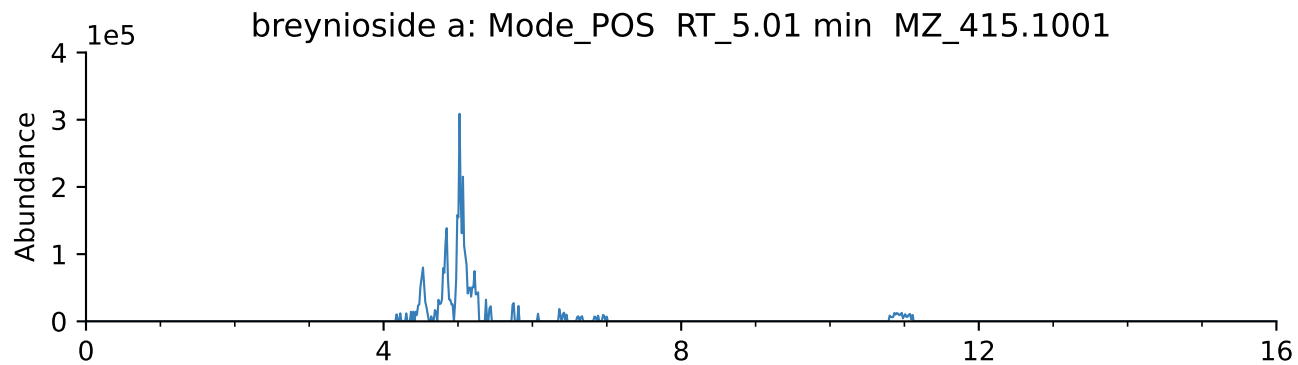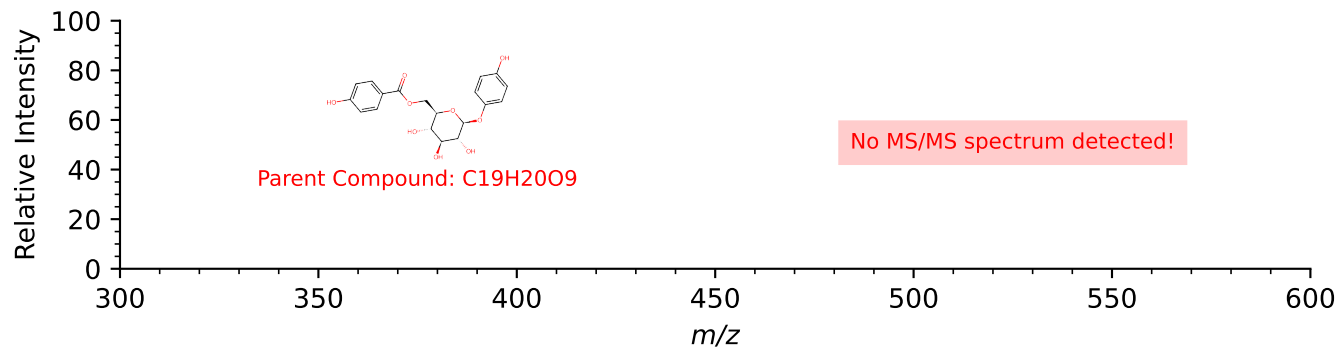

Supplement: identification_of_ingredients.zip [file compound00442.pdf › identification of ingredients/Data analysis/3.mass spectrometry/Original Ingredients/compound00442.pdf]

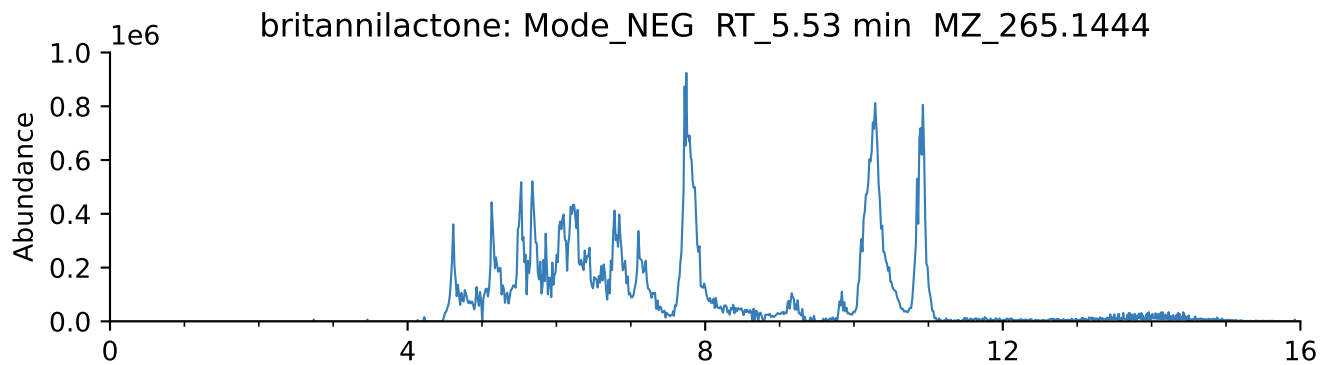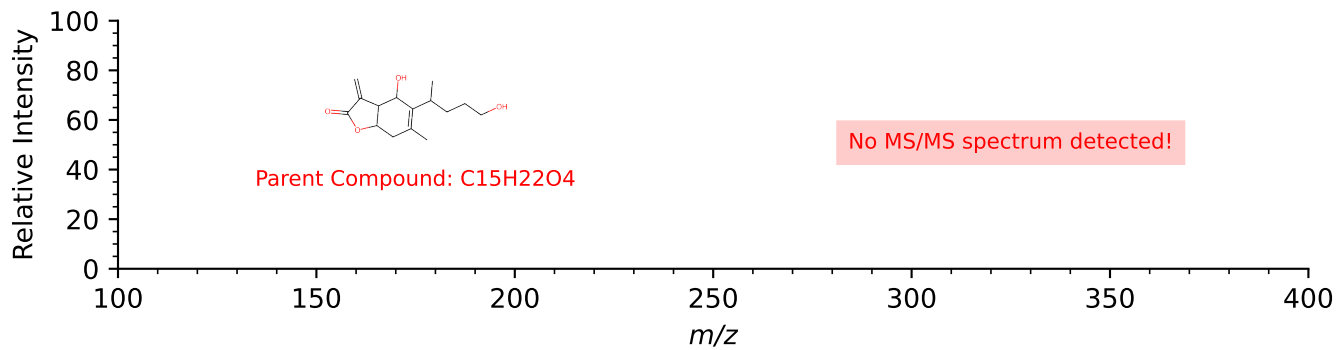

Supplement: identification_of_ingredients.zip [file compound00443.pdf › identification of ingredients/Data analysis/3.mass spectrometry/Original Ingredients/compound00443.pdf]

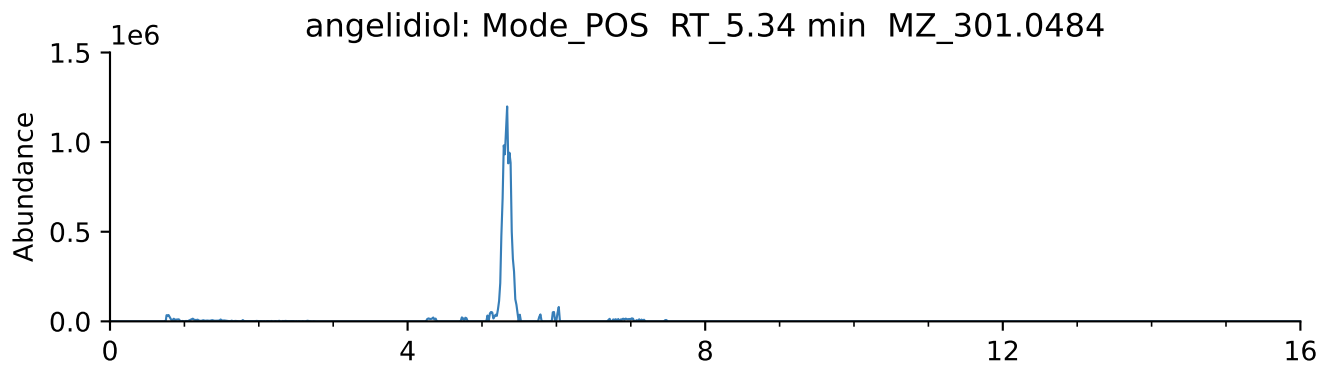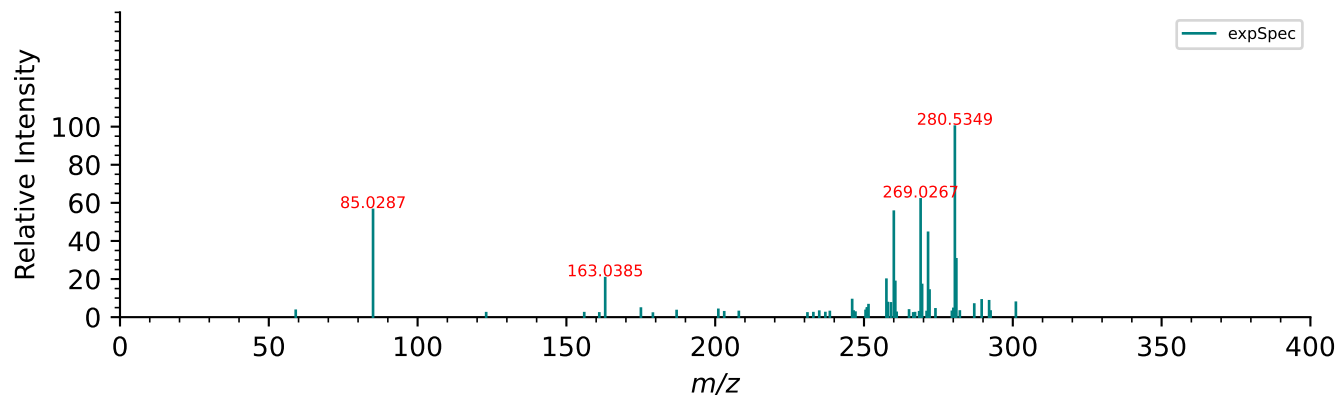

Supplement: identification_of_ingredients.zip [file compound00448.pdf › identification of ingredients/Data analysis/3.mass spectrometry/Original Ingredients/compound00448.pdf]

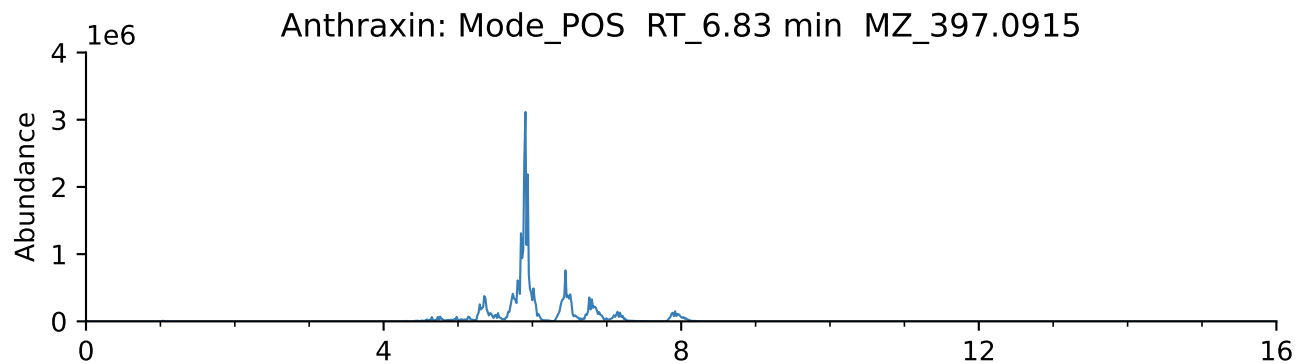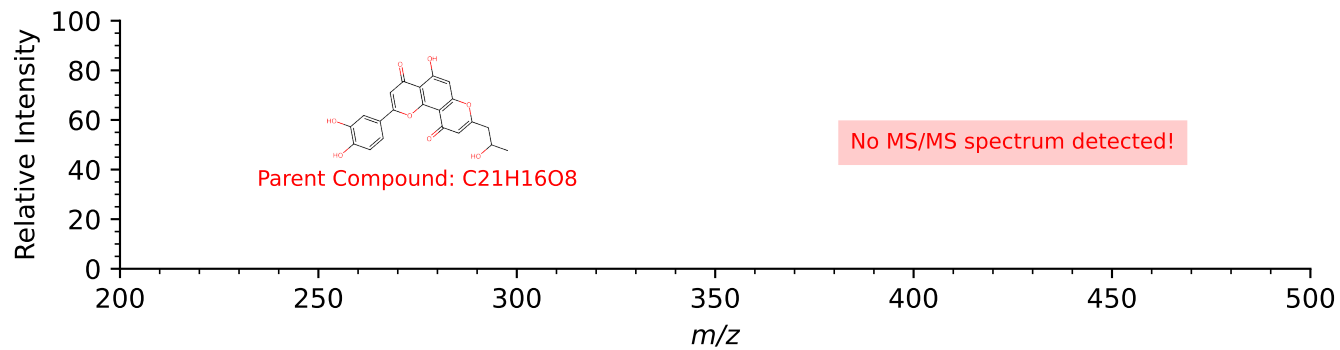

Supplement: identification_of_ingredients.zip [file compound00449.pdf › identification of ingredients/Data analysis/3.mass spectrometry/Original Ingredients/compound00449.pdf]

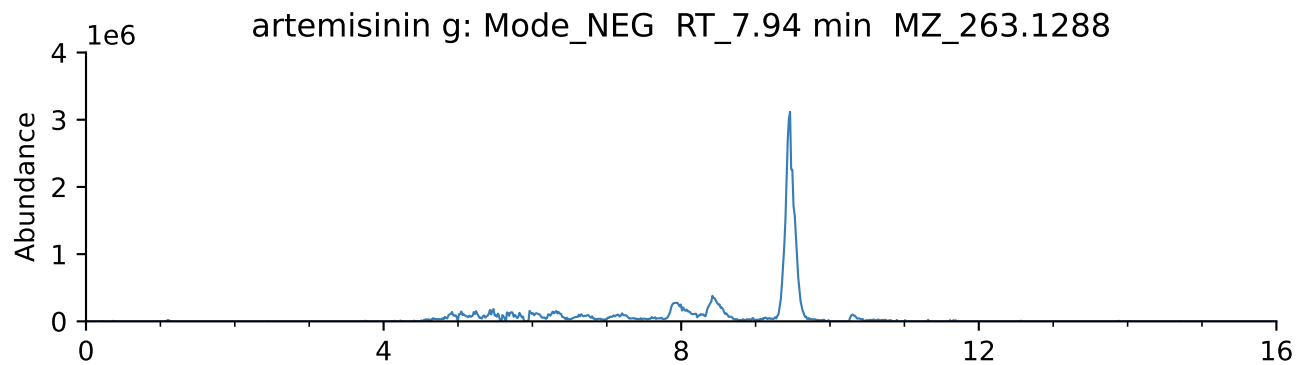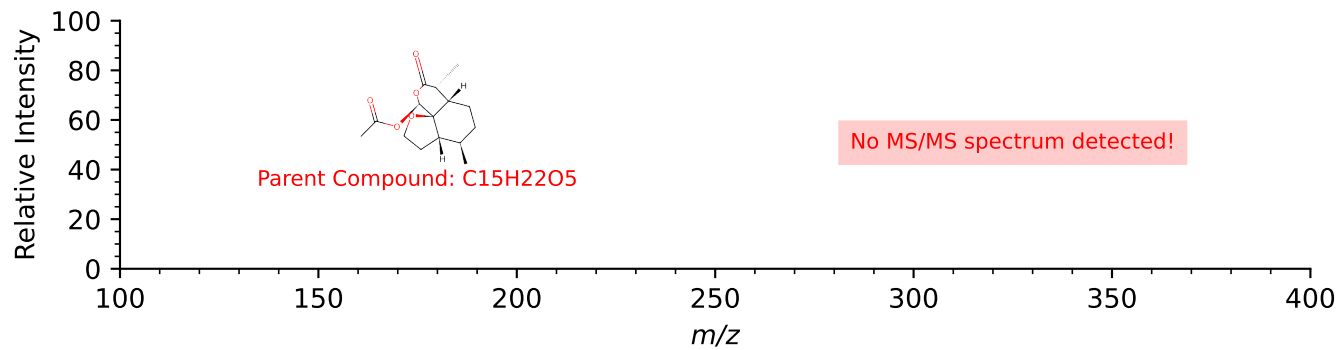

Supplement: identification_of_ingredients.zip [file compound00455.pdf › identification of ingredients/Data analysis/3.mass spectrometry/Original Ingredients/compound00455.pdf]

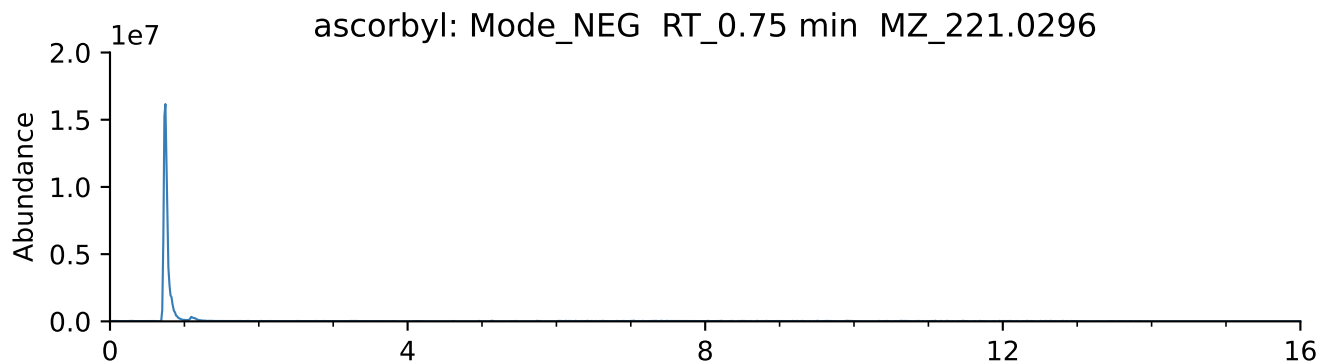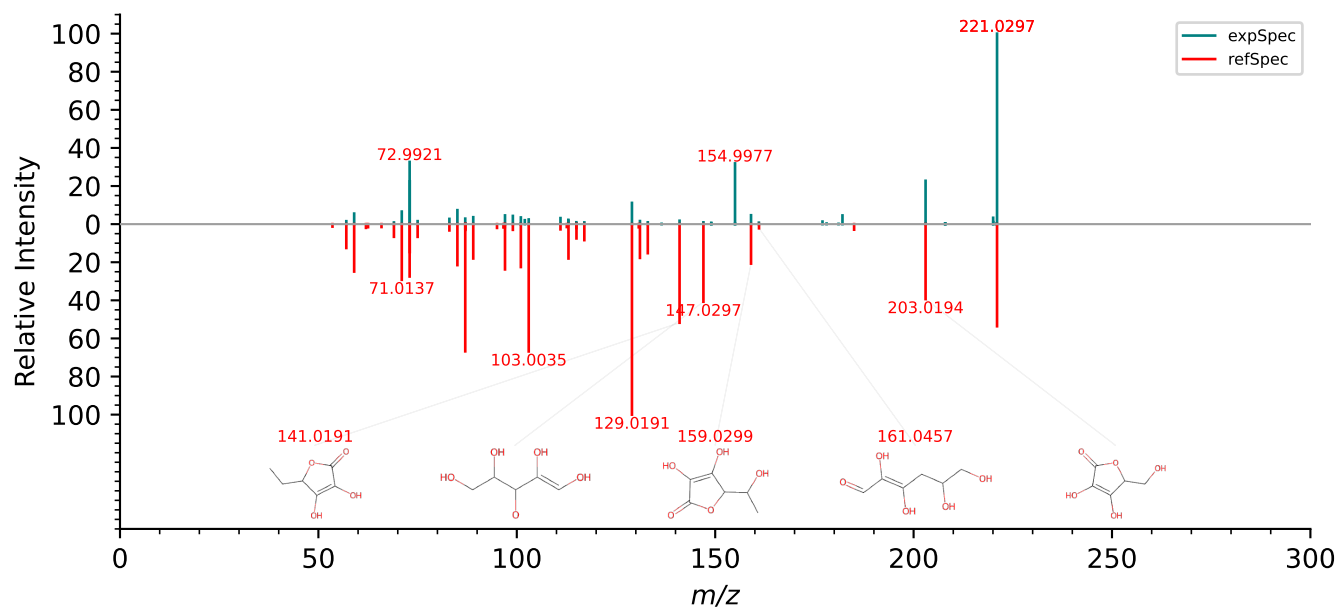

Supplement: identification_of_ingredients.zip [file compound00456.pdf › identification of ingredients/Data analysis/3.mass spectrometry/Original Ingredients/compound00456.pdf]

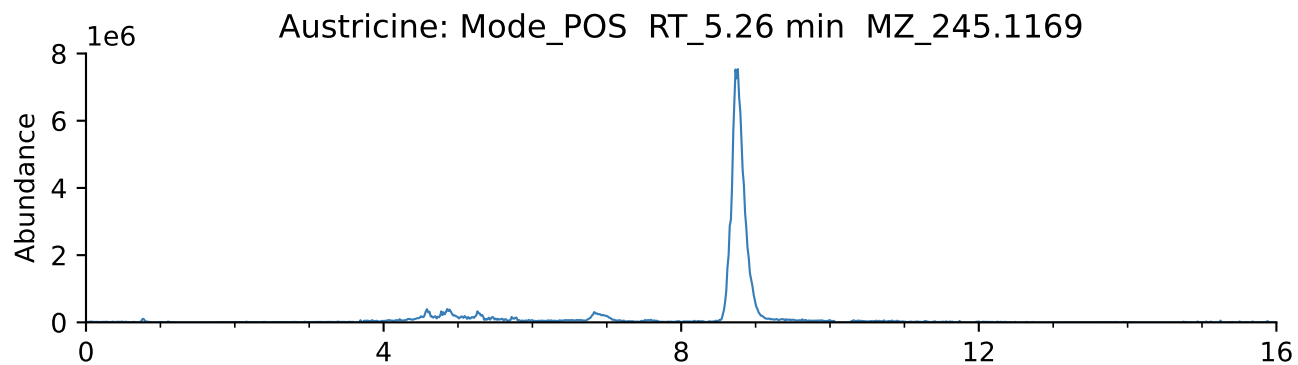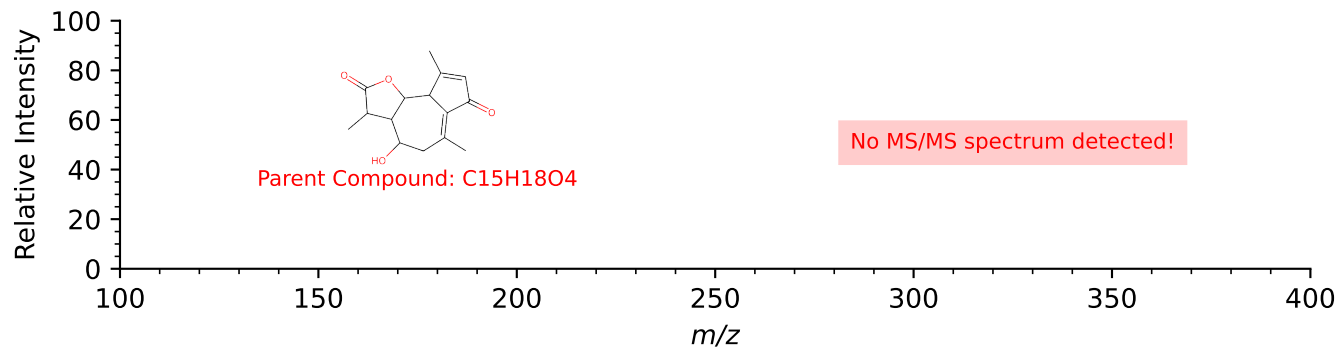

Supplement: identification_of_ingredients.zip [file compound00458.pdf › identification of ingredients/Data analysis/3.mass spectrometry/Original Ingredients/compound00458.pdf]

Auxin a: Mode\_NEG RT\_8.44 min MZ\_309.2071

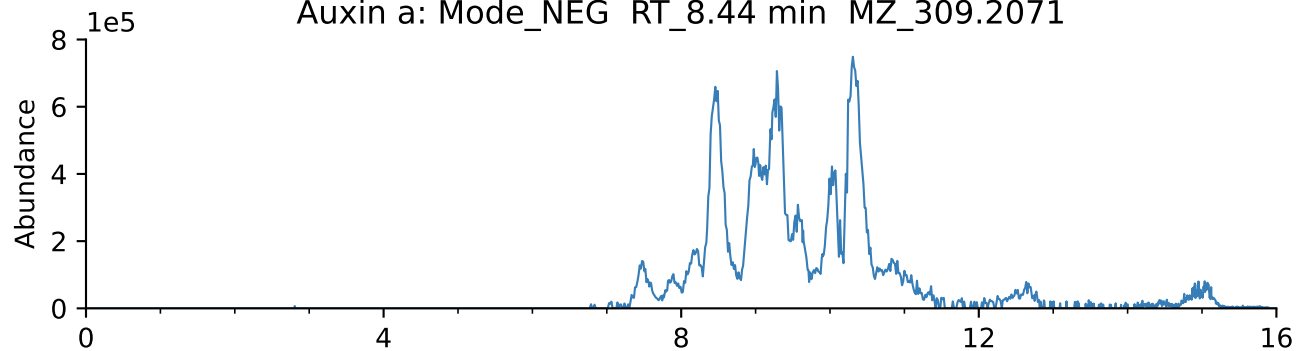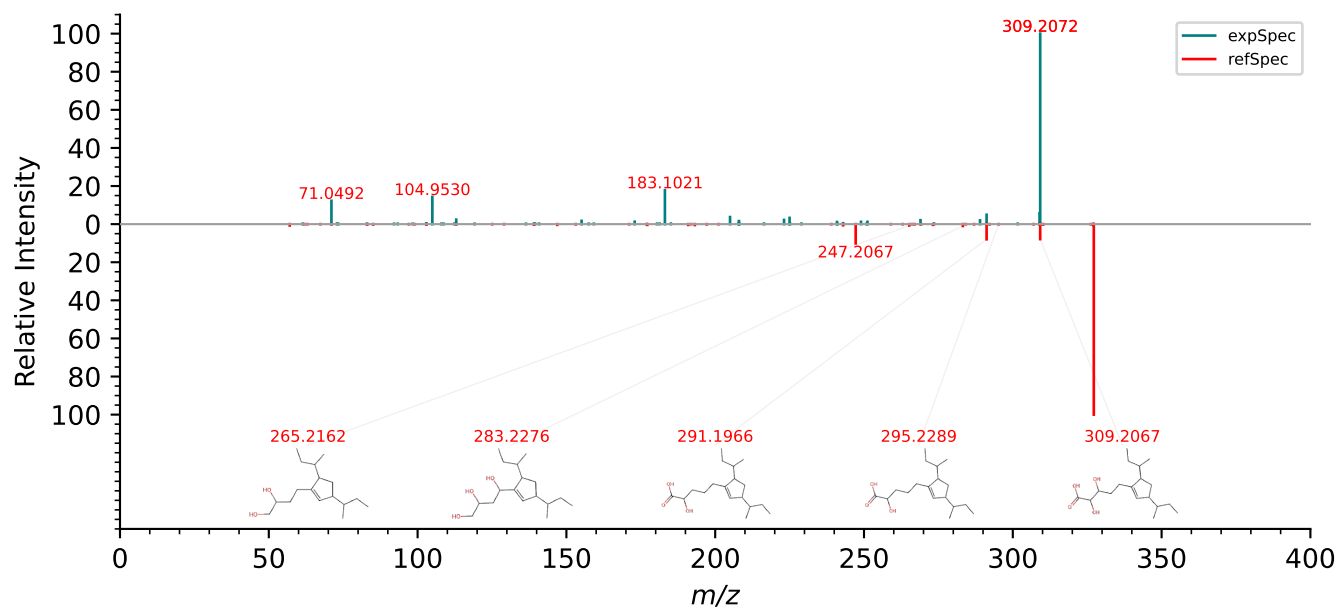

Supplement: identification_of_ingredients.zip [file compound00459.pdf › identification of ingredients/Data analysis/3.mass spectrometry/Original Ingredients/compound00459.pdf]

# Auxin b: Mode\_NEG RT\_9.26 min MZ\_309.2071

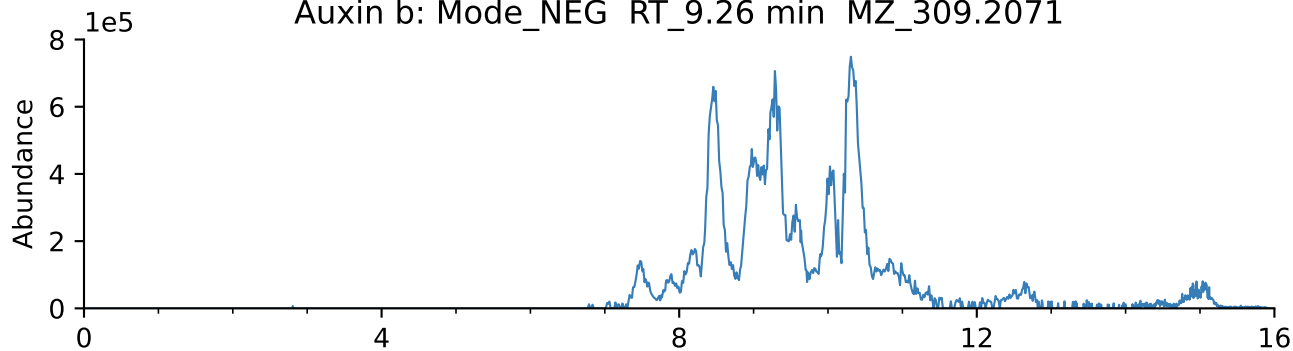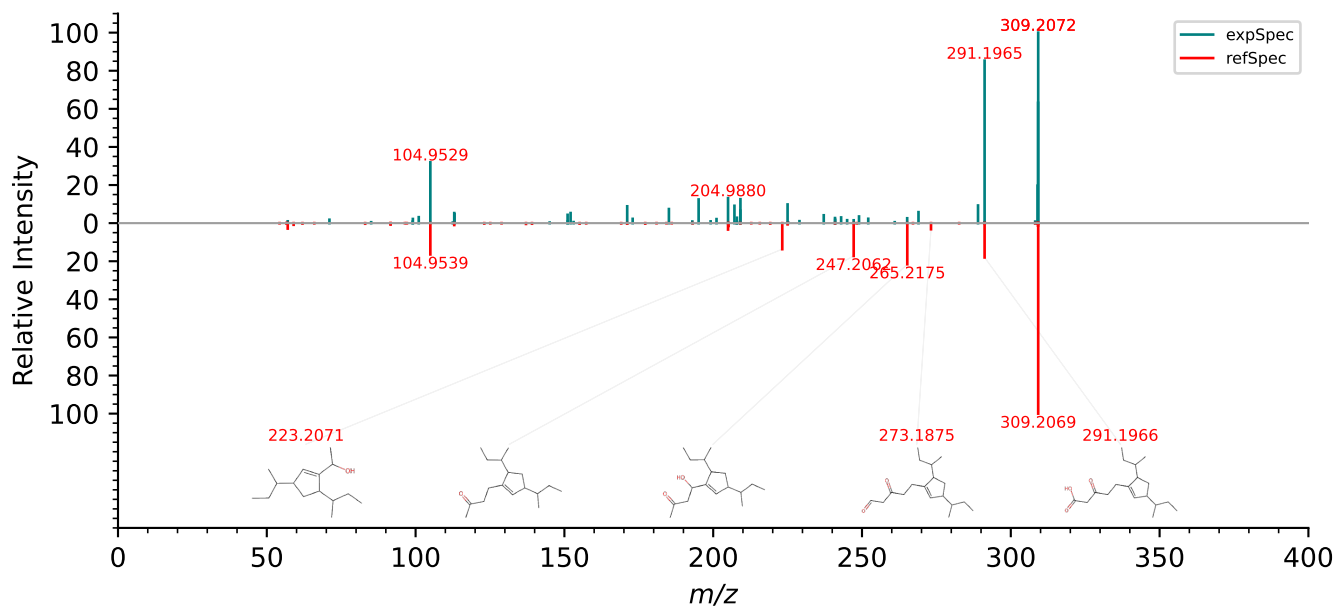

Supplement: identification_of_ingredients.zip [file compound00460.pdf › identification of ingredients/Data analysis/3.mass spectrometry/Original Ingredients/compound00460.pdf]

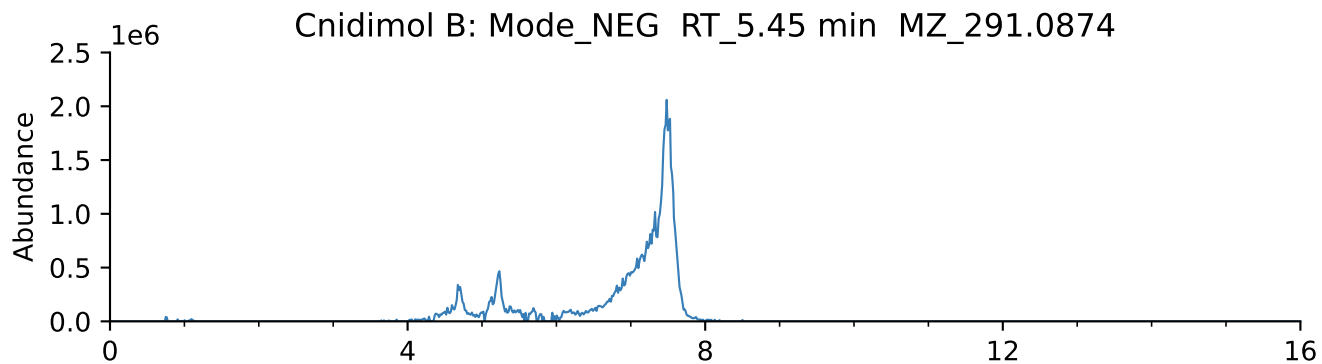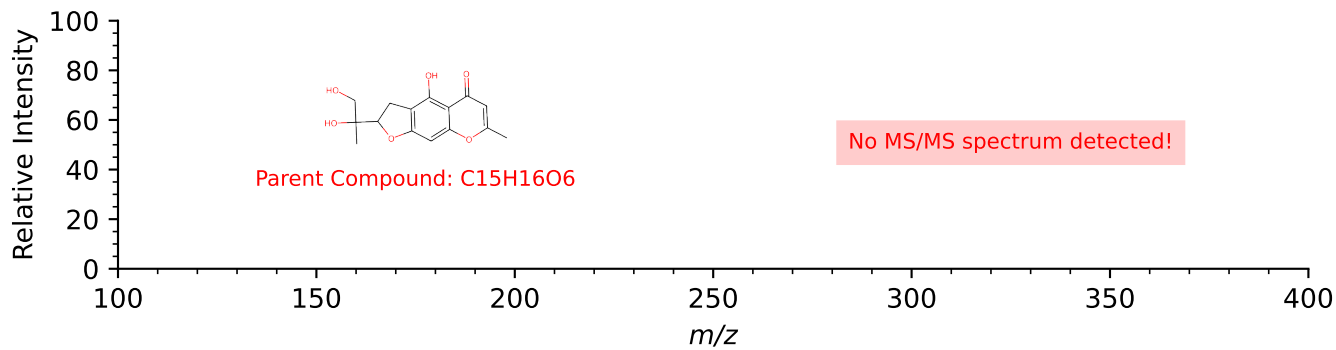

Supplement: identification_of_ingredients.zip [file compound00478.pdf › identification of ingredients/Data analysis/3.mass spectrometry/Original Ingredients/compound00478.pdf]

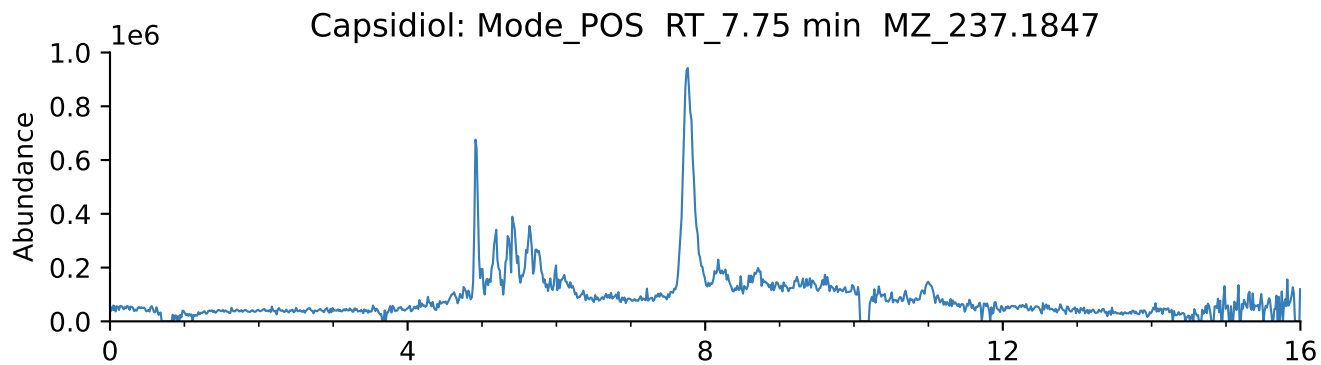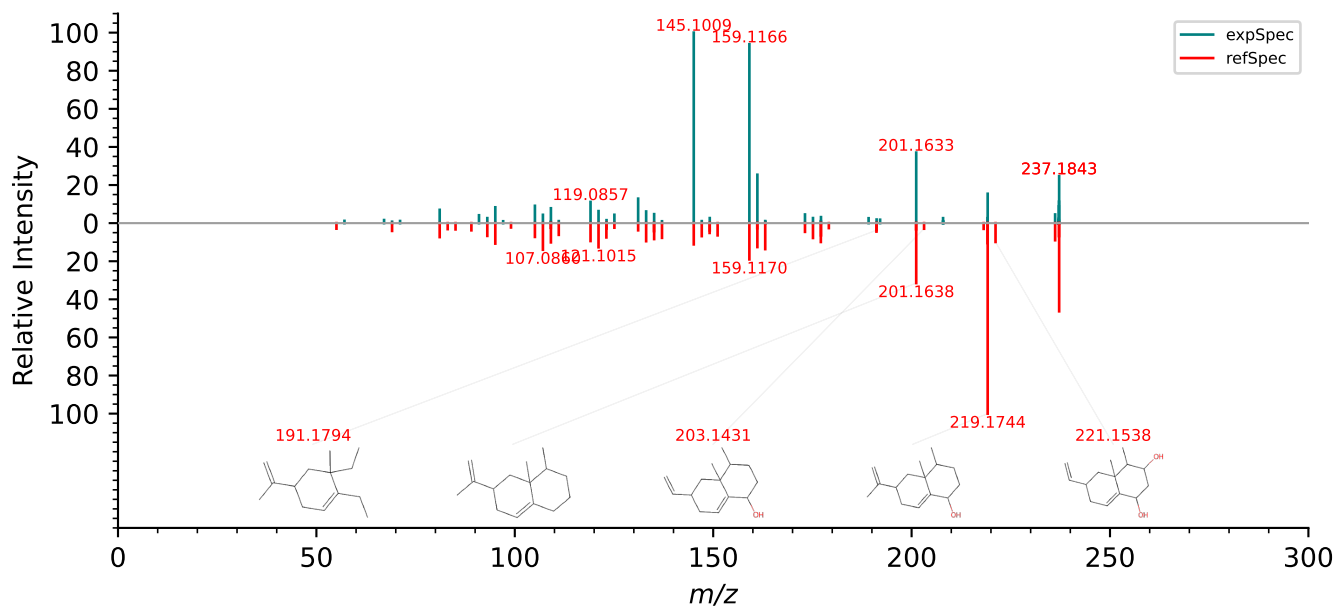

Supplement: identification_of_ingredients.zip [file compound00481.pdf › identification of ingredients/Data analysis/3.mass spectrometry/Original Ingredients/compound00481.pdf]

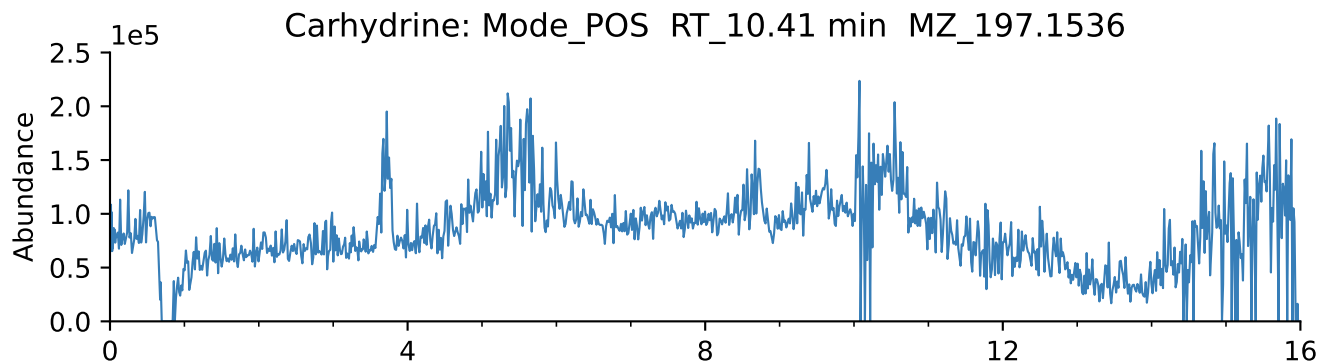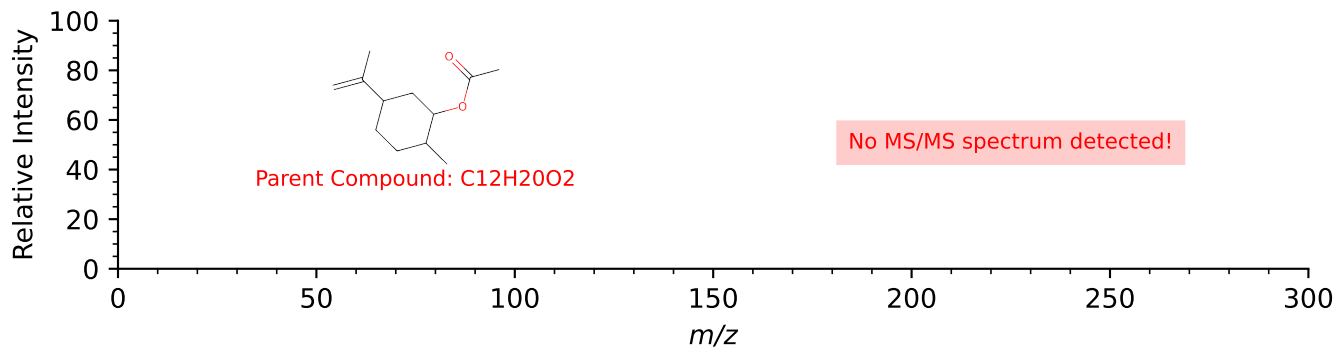

Supplement: identification_of_ingredients.zip [file compound00482.pdf › identification of ingredients/Data analysis/3.mass spectrometry/Original Ingredients/compound00482.pdf]

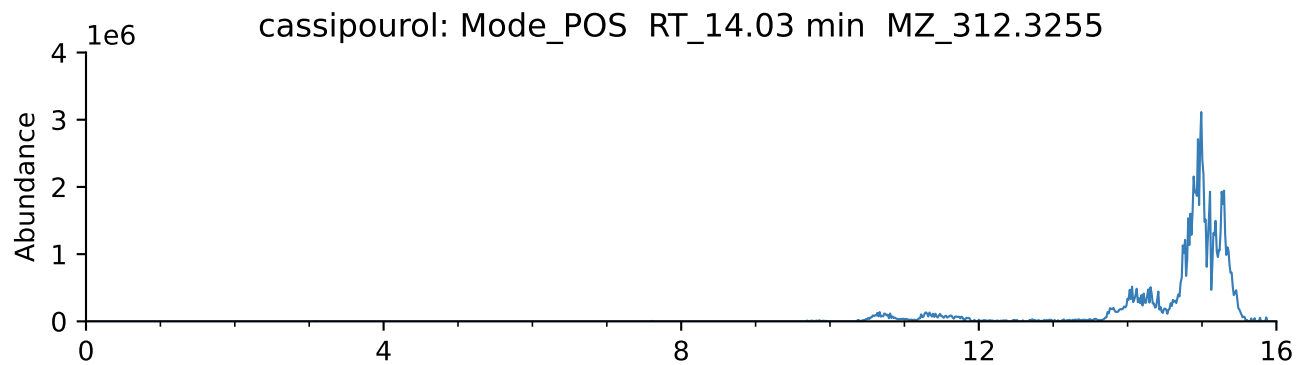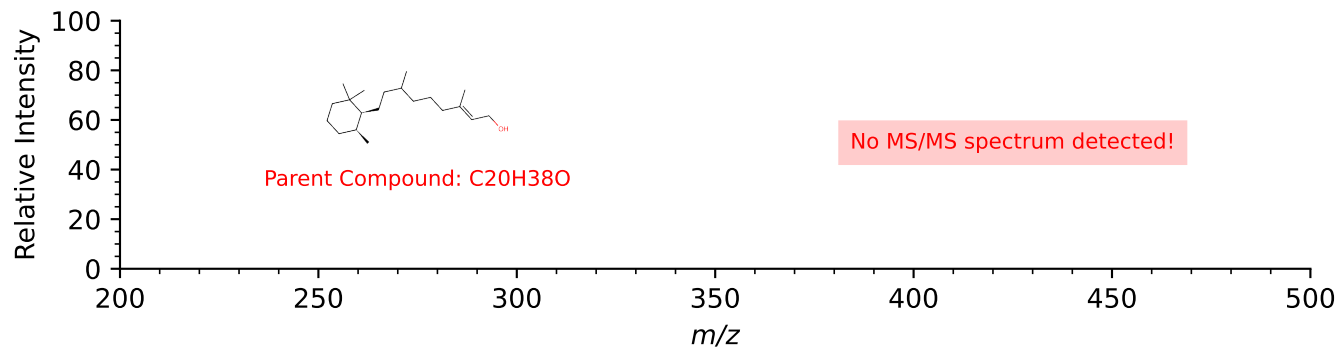

Supplement: identification_of_ingredients.zip [file compound00483.pdf › identification of ingredients/Data analysis/3.mass spectrometry/Original Ingredients/compound00483.pdf]

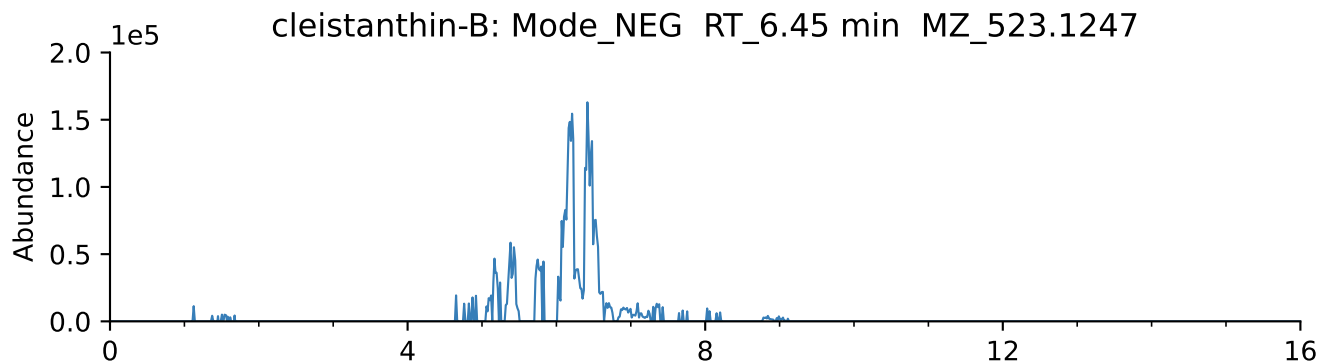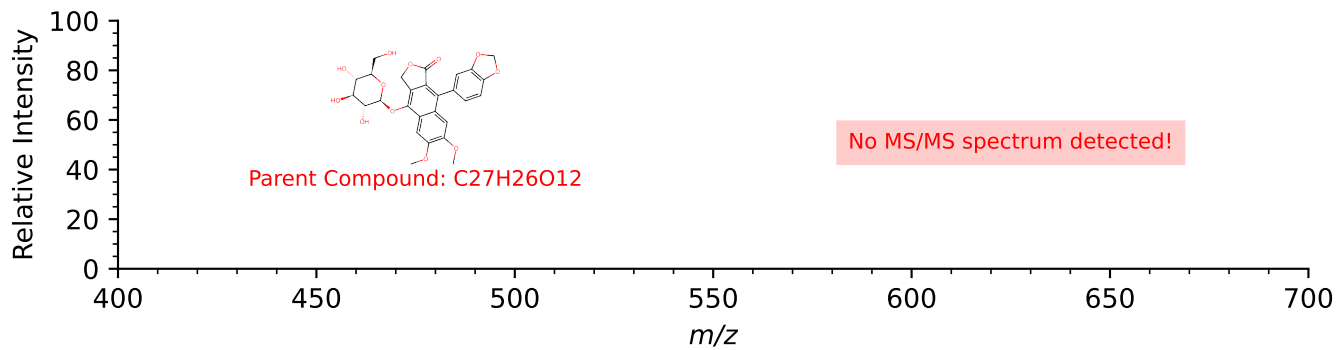

Supplement: identification_of_ingredients.zip [file compound00484.pdf › identification of ingredients/Data analysis/3.mass spectrometry/Original Ingredients/compound00484.pdf]
